# Supplementary material for: High-resolution prediction of American red squirrel in Interior Alaska: a role model for conservation using open access data, machine learning, GIS and LIDAR
Source: PeerJ journal article supplement (doi:10.7717/peerj.11830), 2021-09-14
Supplement: fairbanks_2010_metadata.zip [file fairbanks_2010_metadata.zip]

Analyzed on 9/13/2010 at 12:35:04 PM

Statistical Summary

Mean: 0.011 feet  
Median: 0.005 feet  
Mode: 0.006 feet  
Kurtosis: 0.276  
Skew: 0.261  
Minimum: -0.45 feet  
Maximum: 0.5 feet  
Range: 0.95 feet  
Count: 4280

RMSE: 0.128  
RMSE\*1.96 (95% CI - NSSDA) 0.251

| Bin   | Frequency |
|-------|-----------|
| -0.45 | 0         |
| -0.4  | 2         |
| -0.35 | 3         |
| -0.3  | 19        |
| -0.25 | 37        |
| -0.2  | 109       |
| -0.15 | 226       |
| -0.1  | 423       |
| -0.05 | 571       |
| 0     | 686       |
| 0.05  | 685       |
| 0.1   | 545       |
| 0.15  | 391       |
| 0.2   | 245       |
| 0.25  | 173       |
| 0.3   | 84        |
| 0.35  | 45        |
| 0.4   | 22        |
| 0.45  | 11        |
| 0.5   | 3         |
| sum   | 4280      |

**Histogram: Fairbanks N. Star Borough Lidar**

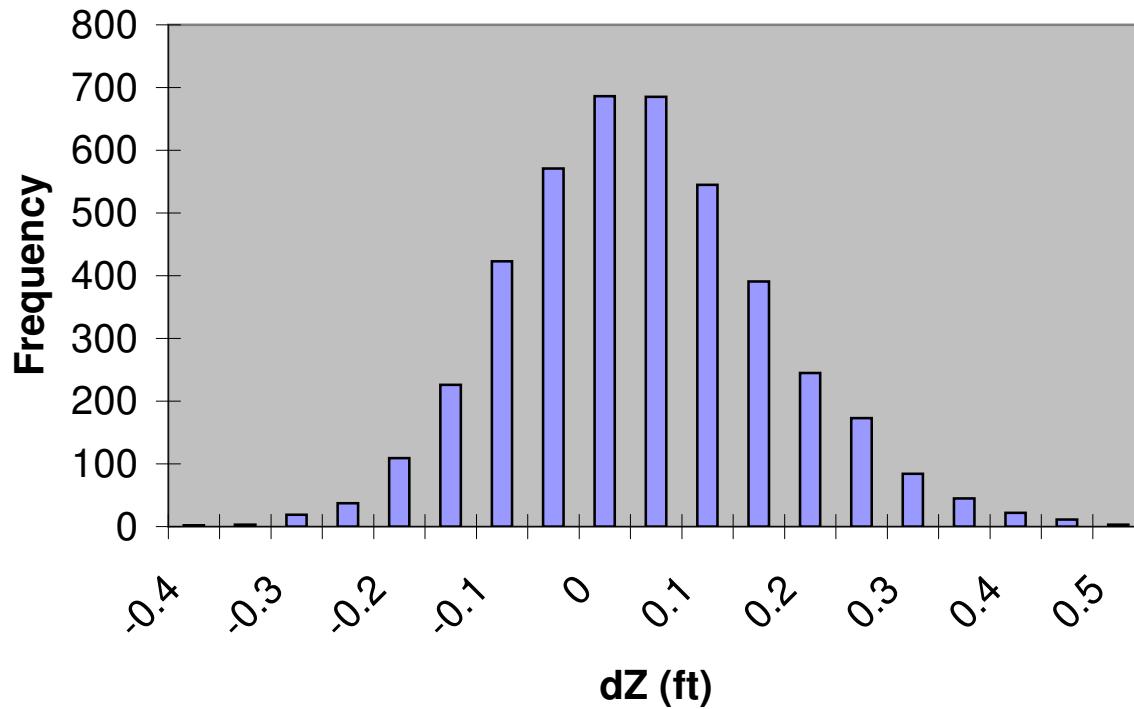

| Number | Easting | Northing | Known Z | Laser Z | Dz     | Dz^2     |
|--------|---------|----------|---------|---------|--------|----------|
| 105936 | 1421440 | 3951995  | 475.693 | 475.28  | -0.413 | 0.170569 |
| 103820 | 1373875 | 3957149  | 445.692 | 445.29  | -0.402 | 0.161604 |
| 103808 | 1373798 | 3958258  | 445.12  | 444.73  | -0.39  | 0.1521   |
| 103833 | 1373864 | 3956580  | 445.99  | 445.62  | -0.37  | 0.1369   |
| 103795 | 1373728 | 3958823  | 445.317 | 444.95  | -0.367 | 0.134689 |
| 100994 | 1334798 | 3948868  | 518.492 | 518.15  | -0.342 | 0.116964 |
| 100947 | 1336107 | 3950317  | 433.048 | 432.71  | -0.338 | 0.114244 |
| 101483 | 1348150 | 3965520  | 455.357 | 455.02  | -0.337 | 0.113569 |
| 101164 | 1336571 | 3950775  | 432.784 | 432.45  | -0.334 | 0.111556 |
| 104468 | 1373776 | 3952594  | 447.445 | 447.12  | -0.325 | 0.105625 |
| 103781 | 1373640 | 3959384  | 443.601 | 443.28  | -0.321 | 0.103041 |
| 100458 | 1348789 | 3966741  | 458.947 | 458.63  | -0.317 | 0.100489 |
| 104474 | 1373781 | 3952782  | 447.656 | 447.34  | -0.316 | 0.099856 |
| 101000 | 1334731 | 3948628  | 538.275 | 537.96  | -0.315 | 0.099225 |
| 100819 | 1340533 | 3953671  | 432.94  | 432.63  | -0.31  | 0.0961   |
| 106237 | 1421790 | 3970240  | 472.42  | 472.11  | -0.31  | 0.0961   |
| 100931 | 1336594 | 3950821  | 432.838 | 432.53  | -0.308 | 0.094864 |
| 103786 | 1373673 | 3959187  | 444.258 | 443.95  | -0.308 | 0.094864 |
| 100154 | 1358223 | 3964121  | 435.197 | 434.89  | -0.307 | 0.094249 |
| 103645 | 1374954 | 3964514  | 444.956 | 444.65  | -0.306 | 0.093636 |
| 101515 | 1348959 | 3966969  | 459.593 | 459.29  | -0.303 | 0.091809 |
| 100932 | 1336566 | 3950792  | 432.862 | 432.56  | -0.302 | 0.091204 |
| 103357 | 1379815 | 3974783  | 494.162 | 493.86  | -0.302 | 0.091204 |
| 104190 | 1372459 | 3947302  | 451.42  | 451.12  | -0.3   | 0.09     |
| 104179 | 1372415 | 3947319  | 449.336 | 449.04  | -0.296 | 0.087616 |
| 103359 | 1379776 | 3974694  | 491.621 | 491.33  | -0.291 | 0.084681 |
| 104186 | 1372429 | 3947275  | 451.257 | 450.97  | -0.287 | 0.082369 |
| 103787 | 1373679 | 3959148  | 444.284 | 444     | -0.284 | 0.080656 |
| 103791 | 1373704 | 3958989  | 444.564 | 444.28  | -0.284 | 0.080656 |
| 104210 | 1372623 | 3947573  | 450.463 | 450.18  | -0.283 | 0.080089 |
| 103780 | 1373634 | 3959423  | 443.711 | 443.43  | -0.281 | 0.078961 |
| 103355 | 1379857 | 3974870  | 496.881 | 496.6   | -0.281 | 0.078961 |
| 100707 | 1343684 | 3957467  | 433.688 | 433.41  | -0.278 | 0.077284 |
| 104185 | 1372419 | 3947275  | 451.158 | 450.88  | -0.278 | 0.077284 |
| 100939 | 1336338 | 3950556  | 432.967 | 432.69  | -0.277 | 0.076729 |
| 104178 | 1372426 | 3947323  | 449.566 | 449.29  | -0.276 | 0.076176 |
| 103821 | 1373874 | 3957103  | 445.655 | 445.38  | -0.275 | 0.075625 |
| 104472 | 1373780 | 3952727  | 447.764 | 447.49  | -0.274 | 0.075076 |
| 101597 | 1352314 | 3969063  | 449.484 | 449.21  | -0.274 | 0.075076 |
| 103452 | 1379599 | 3971436  | 449.484 | 449.21  | -0.274 | 0.075076 |
| 107601 | 1396337 | 3957182  | 457.122 | 456.85  | -0.272 | 0.073984 |
| 100987 | 1334945 | 3949112  | 494.142 | 493.87  | -0.272 | 0.073984 |
| 106278 | 1421815 | 3971779  | 471.5   | 471.23  | -0.27  | 0.0729   |
| 103796 | 1373732 | 3958780  | 445.408 | 445.14  | -0.268 | 0.071824 |
| 103777 | 1373615 | 3959538  | 444.017 | 443.75  | -0.267 | 0.071289 |
| 104174 | 1372470 | 3947352  | 450.347 | 450.08  | -0.267 | 0.071289 |
| 101109 | 1334834 | 3948920  | 512.287 | 512.02  | -0.267 | 0.071289 |
| 106267 | 1421805 | 3971224  | 470.046 | 469.78  | -0.266 | 0.070756 |
| 104469 | 1373776 | 3952619  | 447.493 | 447.23  | -0.263 | 0.069169 |
| 107002 | 1420630 | 3955001  | 475.453 | 475.19  | -0.263 | 0.069169 |

|        |         |         |         |        |        |          |
|--------|---------|---------|---------|--------|--------|----------|
| 106259 | 1421801 | 3970858 | 471.112 | 470.85 | -0.262 | 0.068644 |
| 107661 | 1395442 | 3954138 | 458.421 | 458.16 | -0.261 | 0.068121 |
| 101006 | 1334666 | 3948391 | 558.589 | 558.33 | -0.259 | 0.067081 |
| 103776 | 1373609 | 3959575 | 444.038 | 443.78 | -0.258 | 0.066564 |
| 105533 | 1429766 | 3934912 | 493.988 | 493.73 | -0.258 | 0.066564 |
| 107636 | 1395848 | 3955519 | 457.806 | 457.55 | -0.256 | 0.065536 |
| 106285 | 1421823 | 3972152 | 471.375 | 471.12 | -0.255 | 0.065025 |
| 103667 | 1374854 | 3963666 | 447.104 | 446.85 | -0.254 | 0.064516 |
| 103760 | 1373755 | 3960067 | 444.322 | 444.07 | -0.252 | 0.063504 |
| 103822 | 1373873 | 3957058 | 445.402 | 445.15 | -0.252 | 0.063504 |
| 107644 | 1395724 | 3955096 | 458.801 | 458.55 | -0.251 | 0.063001 |
| 100609 | 1345670 | 3961015 | 436.989 | 436.74 | -0.249 | 0.062001 |
| 104218 | 1372680 | 3947673 | 450.809 | 450.56 | -0.249 | 0.062001 |
| 100455 | 1348854 | 3966858 | 459.199 | 458.95 | -0.249 | 0.062001 |
| 101517 | 1349001 | 3967044 | 459.819 | 459.57 | -0.249 | 0.062001 |
| 106946 | 1420725 | 3957601 | 474.959 | 474.71 | -0.249 | 0.062001 |
| 100999 | 1334742 | 3948668 | 534.899 | 534.65 | -0.249 | 0.062001 |
| 103843 | 1373852 | 3956180 | 445.788 | 445.54 | -0.248 | 0.061504 |
| 103371 | 1379628 | 3974147 | 481.818 | 481.57 | -0.248 | 0.061504 |
| 105657 | 1428183 | 3939838 | 488.698 | 488.45 | -0.248 | 0.061504 |
| 104214 | 1372652 | 3947624 | 450.517 | 450.27 | -0.247 | 0.061009 |
| 106299 | 1421838 | 3972903 | 475.016 | 474.77 | -0.246 | 0.060516 |
| 100925 | 1336770 | 3951005 | 432.985 | 432.74 | -0.245 | 0.060025 |
| 103915 | 1373773 | 3952859 | 447.545 | 447.3  | -0.245 | 0.060025 |
| 103794 | 1373722 | 3958865 | 444.983 | 444.74 | -0.243 | 0.059049 |
| 103804 | 1373772 | 3958435 | 445.222 | 444.98 | -0.242 | 0.058564 |
| 101513 | 1348917 | 3966894 | 459.472 | 459.23 | -0.242 | 0.058564 |
| 105633 | 1429044 | 3939091 | 490.272 | 490.03 | -0.242 | 0.058564 |
| 103595 | 1375589 | 3967340 | 444.661 | 444.42 | -0.241 | 0.058081 |
| 103793 | 1373717 | 3958907 | 444.901 | 444.66 | -0.241 | 0.058081 |
| 101508 | 1348790 | 3966665 | 458.731 | 458.49 | -0.241 | 0.058081 |
| 103828 | 1373869 | 3956792 | 445.49  | 445.25 | -0.24  | 0.0576   |
| 100497 | 1347971 | 3965276 | 454.568 | 454.33 | -0.238 | 0.056644 |
| 100530 | 1347254 | 3963994 | 440.666 | 440.43 | -0.236 | 0.055696 |
| 100474 | 1348450 | 3966135 | 457.146 | 456.91 | -0.236 | 0.055696 |
| 107014 | 1420374 | 3954262 | 474.475 | 474.24 | -0.235 | 0.055225 |
| 103848 | 1373847 | 3955979 | 445.824 | 445.59 | -0.234 | 0.054756 |
| 103805 | 1373778 | 3958391 | 445.023 | 444.79 | -0.233 | 0.054289 |
| 103834 | 1373863 | 3956538 | 445.733 | 445.5  | -0.233 | 0.054289 |
| 103746 | 1374016 | 3960415 | 445.352 | 445.12 | -0.232 | 0.053824 |
| 107526 | 1398864 | 3959907 | 458.292 | 458.06 | -0.232 | 0.053824 |
| 107682 | 1395023 | 3953094 | 463.502 | 463.27 | -0.232 | 0.053824 |
| 100995 | 1334786 | 3948829 | 521.962 | 521.73 | -0.232 | 0.053824 |
| 103381 | 1379604 | 3973691 | 470.661 | 470.43 | -0.231 | 0.053361 |
| 103544 | 1377124 | 3968863 | 447.408 | 447.18 | -0.228 | 0.051984 |
| 106751 | 1421793 | 3971481 | 469.718 | 469.49 | -0.228 | 0.051984 |
| 100804 | 1340968 | 3954170 | 432.597 | 432.37 | -0.227 | 0.051529 |
| 103774 | 1373597 | 3959648 | 444.107 | 443.88 | -0.227 | 0.051529 |
| 101106 | 1334792 | 3948806 | 523.067 | 522.84 | -0.227 | 0.051529 |
| 101096 | 1334674 | 3948371 | 560.377 | 560.15 | -0.227 | 0.051529 |
| 103769 | 1373570 | 3959815 | 443.766 | 443.54 | -0.226 | 0.051076 |
| 100722 | 1343324 | 3956904 | 433.145 | 432.92 | -0.225 | 0.050625 |

|        |         |         |         |        |        |          |
|--------|---------|---------|---------|--------|--------|----------|
| 103916 | 1373771 | 3952821 | 447.605 | 447.38 | -0.225 | 0.050625 |
| 103383 | 1379604 | 3973600 | 468.875 | 468.65 | -0.225 | 0.050625 |
| 106752 | 1421792 | 3971440 | 469.554 | 469.33 | -0.224 | 0.050176 |
| 106728 | 1421814 | 3972633 | 473.974 | 473.75 | -0.224 | 0.050176 |
| 100052 | 1357734 | 3960038 | 436.553 | 436.33 | -0.223 | 0.049729 |
| 106773 | 1421774 | 3970447 | 472.163 | 471.94 | -0.223 | 0.049729 |
| 101866 | 1356997 | 3974824 | 494.213 | 493.99 | -0.223 | 0.049729 |
| 103815 | 1373876 | 3957380 | 446.562 | 446.34 | -0.222 | 0.049284 |
| 106746 | 1421798 | 3971759 | 471.352 | 471.13 | -0.222 | 0.049284 |
| 101790 | 1358371 | 3971862 | 441.681 | 441.46 | -0.221 | 0.048841 |
| 101005 | 1334677 | 3948430 | 555.311 | 555.09 | -0.221 | 0.048841 |
| 101518 | 1349022 | 3967081 | 459.95  | 459.73 | -0.22  | 0.0484   |
| 106749 | 1421795 | 3971602 | 470.54  | 470.32 | -0.22  | 0.0484   |
| 104202 | 1372563 | 3947469 | 450.709 | 450.49 | -0.219 | 0.047961 |
| 105957 | 1421094 | 3953029 | 475.449 | 475.23 | -0.219 | 0.047961 |
| 100983 | 1335055 | 3949227 | 479.809 | 479.59 | -0.219 | 0.047961 |
| 107598 | 1396382 | 3957340 | 457.838 | 457.62 | -0.218 | 0.047524 |
| 101300 | 1343797 | 3957641 | 434.207 | 433.99 | -0.217 | 0.047089 |
| 101817 | 1358363 | 3973115 | 449.517 | 449.3  | -0.217 | 0.047089 |
| 103593 | 1375641 | 3967410 | 443.436 | 443.22 | -0.216 | 0.046656 |
| 101551 | 1349747 | 3968304 | 457.056 | 456.84 | -0.216 | 0.046656 |
| 103382 | 1379604 | 3973646 | 469.645 | 469.43 | -0.215 | 0.046225 |
| 103938 | 1373744 | 3951907 | 445.944 | 445.73 | -0.214 | 0.045796 |
| 101590 | 1352000 | 3969072 | 450.674 | 450.46 | -0.214 | 0.045796 |
| 100808 | 1340852 | 3954037 | 432.573 | 432.36 | -0.213 | 0.045369 |
| 106793 | 1421251 | 3967867 | 468.663 | 468.45 | -0.213 | 0.045369 |
| 106747 | 1421796 | 3971681 | 471.133 | 470.92 | -0.213 | 0.045369 |
| 103660 | 1374915 | 3963945 | 446.112 | 445.9  | -0.212 | 0.044944 |
| 103657 | 1374927 | 3964053 | 445.781 | 445.57 | -0.211 | 0.044521 |
| 104409 | 1373737 | 3951090 | 446.261 | 446.05 | -0.211 | 0.044521 |
| 104155 | 1372643 | 3947629 | 450.391 | 450.18 | -0.211 | 0.044521 |
| 104195 | 1372496 | 3947359 | 450.921 | 450.71 | -0.211 | 0.044521 |
| 100469 | 1348554 | 3966322 | 457.66  | 457.45 | -0.21  | 0.0441   |
| 106741 | 1421803 | 3972000 | 471.54  | 471.33 | -0.21  | 0.0441   |
| 105948 | 1421249 | 3952586 | 474.41  | 474.2  | -0.21  | 0.0441   |
| 103782 | 1373647 | 3959345 | 443.699 | 443.49 | -0.209 | 0.043681 |
| 104170 | 1372510 | 3947400 | 450.459 | 450.25 | -0.209 | 0.043681 |
| 104216 | 1372666 | 3947649 | 450.649 | 450.44 | -0.209 | 0.043681 |
| 106964 | 1420706 | 3956756 | 475.049 | 474.84 | -0.209 | 0.043681 |
| 103810 | 1373812 | 3958172 | 445.518 | 445.31 | -0.208 | 0.043264 |
| 103451 | 1379600 | 3971475 | 449.738 | 449.53 | -0.208 | 0.043264 |
| 101548 | 1349670 | 3968205 | 457.618 | 457.41 | -0.208 | 0.043264 |
| 101500 | 1348581 | 3966292 | 457.688 | 457.48 | -0.208 | 0.043264 |
| 101480 | 1348064 | 3965367 | 454.767 | 454.56 | -0.207 | 0.042849 |
| 103814 | 1373875 | 3957426 | 446.666 | 446.46 | -0.206 | 0.042436 |
| 106764 | 1421781 | 3970855 | 471.046 | 470.84 | -0.206 | 0.042436 |
| 103448 | 1379602 | 3971582 | 450.455 | 450.25 | -0.205 | 0.042025 |
| 103920 | 1373766 | 3952676 | 447.724 | 447.52 | -0.204 | 0.041616 |
| 103386 | 1379604 | 3973467 | 466.714 | 466.51 | -0.204 | 0.041616 |
| 106739 | 1421805 | 3972081 | 471.524 | 471.32 | -0.204 | 0.041616 |
| 100993 | 1334813 | 3948907 | 514.994 | 514.79 | -0.204 | 0.041616 |
| 100484 | 1348244 | 3965765 | 456.233 | 456.03 | -0.203 | 0.041209 |

|        |         |         |         |        |        |          |
|--------|---------|---------|---------|--------|--------|----------|
| 101490 | 1348335 | 3965852 | 456.353 | 456.15 | -0.203 | 0.041209 |
| 106858 | 1420880 | 3964685 | 470.433 | 470.23 | -0.203 | 0.041209 |
| 106727 | 1421815 | 3972673 | 474.133 | 473.93 | -0.203 | 0.041209 |
| 105950 | 1421223 | 3952668 | 474.453 | 474.25 | -0.203 | 0.041209 |
| 107544 | 1398005 | 3959517 | 457.322 | 457.12 | -0.202 | 0.040804 |
| 100981 | 1335109 | 3949284 | 472.992 | 472.79 | -0.202 | 0.040804 |
| 100523 | 1347411 | 3964274 | 444.561 | 444.36 | -0.201 | 0.040401 |
| 104213 | 1372645 | 3947611 | 450.481 | 450.28 | -0.201 | 0.040401 |
| 100956 | 1335852 | 3950052 | 434.12  | 433.92 | -0.2   | 0.04     |
| 101728 | 1358361 | 3969054 | 436.9   | 436.7  | -0.2   | 0.04     |
| 101805 | 1358387 | 3972525 | 444.75  | 444.55 | -0.2   | 0.04     |
| 103649 | 1374945 | 3964356 | 444.93  | 444.73 | -0.2   | 0.04     |
| 103744 | 1374020 | 3960486 | 445.43  | 445.23 | -0.2   | 0.04     |
| 103662 | 1374903 | 3963874 | 446.35  | 446.15 | -0.2   | 0.04     |
| 104192 | 1372471 | 3947320 | 451.45  | 451.25 | -0.2   | 0.04     |
| 103427 | 1379603 | 3971991 | 453.15  | 452.95 | -0.2   | 0.04     |
| 103788 | 1373685 | 3959108 | 444.299 | 444.1  | -0.199 | 0.039601 |
| 100365 | 1352615 | 3969067 | 447.149 | 446.95 | -0.199 | 0.039601 |
| 104470 | 1373777 | 3952645 | 447.639 | 447.44 | -0.199 | 0.039601 |
| 100389 | 1351566 | 3969111 | 451.699 | 451.5  | -0.199 | 0.039601 |
| 100794 | 1341252 | 3954496 | 432.998 | 432.8  | -0.198 | 0.039204 |
| 101729 | 1358362 | 3969085 | 436.608 | 436.41 | -0.198 | 0.039204 |
| 103658 | 1374923 | 3964016 | 445.938 | 445.74 | -0.198 | 0.039204 |
| 104212 | 1372637 | 3947598 | 450.438 | 450.24 | -0.198 | 0.039204 |
| 100200 | 1358290 | 3966734 | 438.378 | 438.18 | -0.197 | 0.038809 |
| 101815 | 1358382 | 3972979 | 448.677 | 448.48 | -0.197 | 0.038809 |
| 101453 | 1347383 | 3964166 | 442.786 | 442.59 | -0.196 | 0.038416 |
| 103918 | 1373769 | 3952747 | 447.786 | 447.59 | -0.196 | 0.038416 |
| 104177 | 1372437 | 3947328 | 449.796 | 449.6  | -0.196 | 0.038416 |
| 103790 | 1373698 | 3959029 | 444.445 | 444.25 | -0.195 | 0.038025 |
| 103838 | 1373859 | 3956377 | 445.915 | 445.72 | -0.195 | 0.038025 |
| 104450 | 1373758 | 3952027 | 446.125 | 445.93 | -0.195 | 0.038025 |
| 104402 | 1373733 | 3950938 | 446.425 | 446.23 | -0.195 | 0.038025 |
| 106934 | 1420736 | 3958157 | 474.215 | 474.02 | -0.195 | 0.038025 |
| 105535 | 1429825 | 3935029 | 494.245 | 494.05 | -0.195 | 0.038025 |
| 100241 | 1358344 | 3968528 | 436.974 | 436.78 | -0.194 | 0.037636 |
| 105538 | 1429905 | 3935181 | 493.774 | 493.58 | -0.194 | 0.037636 |
| 104475 | 1373782 | 3952812 | 447.613 | 447.42 | -0.193 | 0.037249 |
| 104180 | 1372400 | 3947307 | 449.843 | 449.65 | -0.193 | 0.037249 |
| 106049 | 1420735 | 3957226 | 474.663 | 474.47 | -0.193 | 0.037249 |
| 107020 | 1420293 | 3954090 | 474.843 | 474.65 | -0.193 | 0.037249 |
| 106723 | 1421820 | 3972871 | 474.953 | 474.76 | -0.193 | 0.037249 |
| 101110 | 1334853 | 3948958 | 508.673 | 508.48 | -0.193 | 0.037249 |
| 101726 | 1358360 | 3969000 | 437.142 | 436.95 | -0.192 | 0.036864 |
| 103771 | 1373580 | 3959751 | 443.852 | 443.66 | -0.192 | 0.036864 |
| 103688 | 1374490 | 3962925 | 448.522 | 448.33 | -0.192 | 0.036864 |
| 100091 | 1358159 | 3961723 | 435.15  | 434.96 | -0.19  | 0.0361   |
| 101135 | 1335638 | 3949811 | 436.031 | 435.84 | -0.19  | 0.0361   |
| 101561 | 1350826 | 3969001 | 452.61  | 452.42 | -0.19  | 0.0361   |
| 103379 | 1379604 | 3973783 | 472.87  | 472.68 | -0.19  | 0.0361   |
| 105524 | 1429599 | 3934484 | 493.73  | 493.54 | -0.19  | 0.0361   |
| 100936 | 1336452 | 3950674 | 432.919 | 432.73 | -0.189 | 0.035721 |

|        |         |         |         |        |        |          |
|--------|---------|---------|---------|--------|--------|----------|
| 103767 | 1373560 | 3959874 | 443.639 | 443.45 | -0.189 | 0.035721 |
| 103758 | 1373810 | 3960088 | 444.249 | 444.06 | -0.189 | 0.035721 |
| 105929 | 1421544 | 3951643 | 476.679 | 476.49 | -0.189 | 0.035721 |
| 103588 | 1375739 | 3967538 | 442.779 | 442.59 | -0.188 | 0.035344 |
| 103366 | 1379671 | 3974373 | 486.068 | 485.88 | -0.188 | 0.035344 |
| 101296 | 1343617 | 3957326 | 433.387 | 433.2  | -0.187 | 0.034969 |
| 103770 | 1373575 | 3959784 | 443.757 | 443.57 | -0.187 | 0.034969 |
| 104427 | 1373744 | 3951466 | 446.627 | 446.44 | -0.187 | 0.034969 |
| 104463 | 1373772 | 3952490 | 447.187 | 447    | -0.187 | 0.034969 |
| 103473 | 1379347 | 3970560 | 451.077 | 450.89 | -0.187 | 0.034969 |
| 101034 | 1333853 | 3947591 | 552.737 | 552.55 | -0.187 | 0.034969 |
| 100536 | 1347126 | 3963757 | 440.536 | 440.35 | -0.186 | 0.034596 |
| 104460 | 1373766 | 3952290 | 446.136 | 445.95 | -0.186 | 0.034596 |
| 104176 | 1372448 | 3947334 | 450.036 | 449.85 | -0.186 | 0.034596 |
| 107015 | 1420362 | 3954235 | 474.436 | 474.25 | -0.186 | 0.034596 |
| 103376 | 1379606 | 3973920 | 476.516 | 476.33 | -0.186 | 0.034596 |
| 103360 | 1379757 | 3974648 | 490.486 | 490.3  | -0.186 | 0.034596 |
| 101100 | 1334719 | 3948535 | 546.176 | 545.99 | -0.186 | 0.034596 |
| 101800 | 1358383 | 3972300 | 443.395 | 443.21 | -0.185 | 0.034225 |
| 104462 | 1373772 | 3952473 | 447.035 | 446.85 | -0.185 | 0.034225 |
| 100098 | 1358167 | 3962019 | 436.104 | 435.92 | -0.184 | 0.033856 |
| 103653 | 1374937 | 3964202 | 445.404 | 445.22 | -0.184 | 0.033856 |
| 101809 | 1358389 | 3972705 | 446.254 | 446.07 | -0.184 | 0.033856 |
| 104152 | 1372669 | 3947676 | 450.624 | 450.44 | -0.184 | 0.033856 |
| 103487 | 1378928 | 3970065 | 452.054 | 451.87 | -0.184 | 0.033856 |
| 100466 | 1348616 | 3966433 | 458.004 | 457.82 | -0.184 | 0.033856 |
| 106038 | 1420725 | 3956685 | 475.084 | 474.9  | -0.184 | 0.033856 |
| 100218 | 1358311 | 3967533 | 435.453 | 435.27 | -0.183 | 0.033489 |
| 100549 | 1346868 | 3963226 | 438.813 | 438.63 | -0.183 | 0.033489 |
| 100358 | 1352917 | 3969063 | 444.753 | 444.57 | -0.183 | 0.033489 |
| 103829 | 1373868 | 3956750 | 445.833 | 445.65 | -0.183 | 0.033489 |
| 103889 | 1373803 | 3953915 | 447.263 | 447.08 | -0.183 | 0.033489 |
| 101509 | 1348812 | 3966704 | 458.943 | 458.76 | -0.183 | 0.033489 |
| 105707 | 1426016 | 3941353 | 486.053 | 485.87 | -0.183 | 0.033489 |
| 105685 | 1427120 | 3940750 | 487.993 | 487.81 | -0.183 | 0.033489 |
| 103358 | 1379795 | 3974739 | 492.983 | 492.8  | -0.183 | 0.033489 |
| 100710 | 1343618 | 3957354 | 433.192 | 433.01 | -0.182 | 0.033124 |
| 100231 | 1358325 | 3968106 | 438.252 | 438.07 | -0.182 | 0.033124 |
| 106281 | 1421818 | 3971946 | 471.652 | 471.47 | -0.182 | 0.033124 |
| 103373 | 1379617 | 3974056 | 479.592 | 479.41 | -0.182 | 0.033124 |
| 105631 | 1429123 | 3939024 | 490.312 | 490.13 | -0.182 | 0.033124 |
| 5527   | 1388588 | 4005429 | 737.802 | 737.62 | -0.182 | 0.033124 |
| 101171 | 1336778 | 3950992 | 432.851 | 432.67 | -0.181 | 0.032761 |
| 101172 | 1336808 | 3951023 | 432.931 | 432.75 | -0.181 | 0.032761 |
| 101292 | 1343472 | 3957094 | 433.261 | 433.08 | -0.181 | 0.032761 |
| 103465 | 1379498 | 3970893 | 450.291 | 450.11 | -0.181 | 0.032761 |
| 103606 | 1375324 | 3966906 | 453.641 | 453.46 | -0.181 | 0.032761 |
| 105529 | 1429679 | 3934720 | 493.121 | 492.94 | -0.181 | 0.032761 |
| 100960 | 1335738 | 3949934 | 435.08  | 434.9  | -0.18  | 0.0324   |
| 100537 | 1347106 | 3963717 | 440.37  | 440.19 | -0.18  | 0.0324   |
| 101569 | 1351126 | 3969058 | 451.89  | 451.71 | -0.18  | 0.0324   |
| 106249 | 1421811 | 3970564 | 471.75  | 471.57 | -0.18  | 0.0324   |

|        |         |         |         |        |        |          |
|--------|---------|---------|---------|--------|--------|----------|
| 106111 | 1420795 | 3960414 | 474.95  | 474.77 | -0.18  | 0.0324   |
| 107003 | 1420615 | 3954931 | 475.4   | 475.22 | -0.18  | 0.0324   |
| 100940 | 1336309 | 3950526 | 433.019 | 432.84 | -0.179 | 0.032041 |
| 104405 | 1373735 | 3951006 | 446.249 | 446.07 | -0.179 | 0.032041 |
| 107455 | 1402319 | 3961350 | 461.709 | 461.53 | -0.179 | 0.032041 |
| 100618 | 1345490 | 3960699 | 436.878 | 436.7  | -0.178 | 0.031684 |
| 103605 | 1375345 | 3966949 | 452.788 | 452.61 | -0.178 | 0.031684 |
| 103608 | 1375285 | 3966820 | 455.438 | 455.26 | -0.178 | 0.031684 |
| 100043 | 1357409 | 3959870 | 436.957 | 436.78 | -0.177 | 0.031329 |
| 101446 | 1347183 | 3963807 | 440.137 | 439.96 | -0.177 | 0.031329 |
| 103585 | 1375854 | 3967691 | 443.107 | 442.93 | -0.177 | 0.031329 |
| 104175 | 1372459 | 3947342 | 450.247 | 450.07 | -0.177 | 0.031329 |
| 101516 | 1348980 | 3967006 | 459.687 | 459.51 | -0.177 | 0.031329 |
| 103393 | 1379602 | 3973166 | 462.697 | 462.52 | -0.177 | 0.031329 |
| 106866 | 1420870 | 3964279 | 471.057 | 470.88 | -0.177 | 0.031329 |
| 106730 | 1421813 | 3972554 | 473.817 | 473.64 | -0.177 | 0.031329 |
| 106696 | 1421847 | 3974286 | 480.517 | 480.34 | -0.177 | 0.031329 |
| 101044 | 1333375 | 3947313 | 540.817 | 540.64 | -0.177 | 0.031329 |
| 100182 | 1358271 | 3965975 | 437.526 | 437.35 | -0.176 | 0.030976 |
| 103789 | 1373692 | 3959068 | 444.426 | 444.25 | -0.176 | 0.030976 |
| 100482 | 1348285 | 3965839 | 456.326 | 456.15 | -0.176 | 0.030976 |
| 103812 | 1373825 | 3958086 | 445.755 | 445.58 | -0.175 | 0.030625 |
| 104206 | 1372596 | 3947525 | 450.555 | 450.38 | -0.175 | 0.030625 |
| 100438 | 1349219 | 3967512 | 459.975 | 459.8  | -0.175 | 0.030625 |
| 107483 | 1400960 | 3960841 | 460.575 | 460.4  | -0.175 | 0.030625 |
| 106742 | 1421802 | 3971960 | 471.675 | 471.5  | -0.175 | 0.030625 |
| 100718 | 1343427 | 3957052 | 432.804 | 432.63 | -0.174 | 0.030276 |
| 104217 | 1372673 | 3947661 | 450.704 | 450.53 | -0.174 | 0.030276 |
| 105658 | 1428152 | 3939865 | 488.674 | 488.5  | -0.174 | 0.030276 |
| 103852 | 1373843 | 3955825 | 445.933 | 445.76 | -0.173 | 0.029929 |
| 103447 | 1379602 | 3971614 | 450.623 | 450.45 | -0.173 | 0.029929 |
| 105548 | 1430027 | 3935413 | 493.503 | 493.33 | -0.173 | 0.029929 |
| 103570 | 1376228 | 3968181 | 446.202 | 446.03 | -0.172 | 0.029584 |
| 106066 | 1420750 | 3958099 | 474.262 | 474.09 | -0.172 | 0.029584 |
| 100802 | 1341025 | 3954236 | 432.741 | 432.57 | -0.171 | 0.029241 |
| 100239 | 1358343 | 3968445 | 437.011 | 436.84 | -0.171 | 0.029241 |
| 106738 | 1421806 | 3972164 | 471.43  | 471.26 | -0.171 | 0.029241 |
| 105981 | 1420375 | 3953932 | 475.411 | 475.24 | -0.171 | 0.029241 |
| 103666 | 1374864 | 3963699 | 446.97  | 446.8  | -0.17  | 0.0289   |
| 101816 | 1358376 | 3973024 | 449.03  | 448.86 | -0.17  | 0.0289   |
| 100465 | 1348637 | 3966470 | 458.07  | 457.9  | -0.17  | 0.0289   |
| 100413 | 1349820 | 3968455 | 458.5   | 458.33 | -0.17  | 0.0289   |
| 106284 | 1421822 | 3972111 | 471.45  | 471.28 | -0.17  | 0.0289   |
| 100989 | 1334894 | 3949050 | 500.88  | 500.71 | -0.17  | 0.0289   |
| 101108 | 1334818 | 3948882 | 516.12  | 515.95 | -0.17  | 0.0289   |
| 103803 | 1373766 | 3958480 | 445.489 | 445.32 | -0.169 | 0.028561 |
| 103936 | 1373745 | 3951975 | 446.029 | 445.86 | -0.169 | 0.028561 |
| 107624 | 1396026 | 3956125 | 457.129 | 456.96 | -0.169 | 0.028561 |
| 106726 | 1421817 | 3972752 | 474.549 | 474.38 | -0.169 | 0.028561 |
| 107019 | 1420303 | 3954110 | 474.689 | 474.52 | -0.169 | 0.028561 |
| 101001 | 1334720 | 3948588 | 541.719 | 541.55 | -0.169 | 0.028561 |
| 100128 | 1358206 | 3963252 | 435.338 | 435.17 | -0.168 | 0.028224 |

|        |         |         |         |        |        |          |
|--------|---------|---------|---------|--------|--------|----------|
| 103839 | 1373857 | 3956338 | 445.878 | 445.71 | -0.168 | 0.028224 |
| 100374 | 1352208 | 3969080 | 450.018 | 449.85 | -0.168 | 0.028224 |
| 105725 | 1424940 | 3941682 | 486.208 | 486.04 | -0.168 | 0.028224 |
| 103665 | 1374873 | 3963733 | 446.807 | 446.64 | -0.167 | 0.027889 |
| 100398 | 1351187 | 3969111 | 453.647 | 453.48 | -0.167 | 0.027889 |
| 105973 | 1420651 | 3953706 | 475.547 | 475.38 | -0.167 | 0.027889 |
| 103884 | 1373809 | 3954149 | 447.146 | 446.98 | -0.166 | 0.027556 |
| 106152 | 1420907 | 3965299 | 470.456 | 470.29 | -0.166 | 0.027556 |
| 105651 | 1428428 | 3939626 | 489.197 | 489.03 | -0.166 | 0.027556 |
| 101398 | 1345925 | 3961436 | 436.945 | 436.78 | -0.165 | 0.027225 |
| 101425 | 1346708 | 3962866 | 437.315 | 437.15 | -0.165 | 0.027225 |
| 103594 | 1375615 | 3967376 | 443.995 | 443.83 | -0.165 | 0.027225 |
| 100197 | 1358287 | 3966603 | 440.074 | 439.91 | -0.164 | 0.026896 |
| 103654 | 1374935 | 3964164 | 445.484 | 445.32 | -0.164 | 0.026896 |
| 103836 | 1373861 | 3956456 | 445.994 | 445.83 | -0.164 | 0.026896 |
| 101573 | 1351286 | 3969072 | 451.144 | 450.98 | -0.164 | 0.026896 |
| 101112 | 1334897 | 3949032 | 501.265 | 501.1  | -0.164 | 0.026896 |
| 100139 | 1358212 | 3963566 | 434.783 | 434.62 | -0.163 | 0.026569 |
| 100215 | 1358308 | 3967402 | 435.273 | 435.11 | -0.163 | 0.026569 |
| 100357 | 1352960 | 3969062 | 444.553 | 444.39 | -0.163 | 0.026569 |
| 103455 | 1379590 | 3971313 | 449.323 | 449.16 | -0.163 | 0.026569 |
| 103377 | 1379605 | 3973874 | 475.293 | 475.13 | -0.163 | 0.026569 |
| 100121 | 1358198 | 3963011 | 435.672 | 435.51 | -0.162 | 0.026244 |
| 103754 | 1373921 | 3960167 | 444.252 | 444.09 | -0.162 | 0.026244 |
| 103837 | 1373860 | 3956416 | 445.962 | 445.8  | -0.162 | 0.026244 |
| 104411 | 1373738 | 3951132 | 446.382 | 446.22 | -0.162 | 0.026244 |
| 104203 | 1372572 | 3947484 | 450.692 | 450.53 | -0.162 | 0.026244 |
| 103482 | 1379102 | 3970230 | 452.052 | 451.89 | -0.162 | 0.026244 |
| 106734 | 1421810 | 3972363 | 472.212 | 472.05 | -0.162 | 0.026244 |
| 106731 | 1421812 | 3972477 | 473.122 | 472.96 | -0.162 | 0.026244 |
| 100172 | 1358259 | 3965545 | 437.151 | 436.99 | -0.161 | 0.025921 |
| 100199 | 1358289 | 3966690 | 438.871 | 438.71 | -0.161 | 0.025921 |
| 100364 | 1352659 | 3969067 | 446.771 | 446.61 | -0.161 | 0.025921 |
| 103387 | 1379604 | 3973424 | 466.071 | 465.91 | -0.161 | 0.025921 |
| 106737 | 1421807 | 3972205 | 471.091 | 470.93 | -0.161 | 0.025921 |
| 106743 | 1421801 | 3971879 | 471.581 | 471.42 | -0.161 | 0.025921 |
| 107006 | 1420592 | 3954841 | 475.061 | 474.9  | -0.161 | 0.025921 |
| 100998 | 1334753 | 3948708 | 531.551 | 531.39 | -0.161 | 0.025921 |
| 106007 | 1420667 | 3955125 | 476     | 475.84 | -0.16  | 0.0256   |
| 100997 | 1334764 | 3948748 | 528.28  | 528.12 | -0.16  | 0.0256   |
| 100952 | 1335964 | 3950168 | 433.619 | 433.46 | -0.159 | 0.025281 |
| 103623 | 1375003 | 3965446 | 446.429 | 446.27 | -0.159 | 0.025281 |
| 103600 | 1375462 | 3967154 | 448.009 | 447.85 | -0.159 | 0.025281 |
| 100986 | 1334972 | 3949141 | 490.579 | 490.42 | -0.159 | 0.025281 |
| 100946 | 1336136 | 3950346 | 432.998 | 432.84 | -0.158 | 0.024964 |
| 103650 | 1374943 | 3964317 | 445.168 | 445.01 | -0.158 | 0.024964 |
| 104198 | 1372526 | 3947406 | 450.678 | 450.52 | -0.158 | 0.024964 |
| 101157 | 1336367 | 3950562 | 432.917 | 432.76 | -0.157 | 0.024649 |
| 103589 | 1375724 | 3967519 | 442.777 | 442.62 | -0.157 | 0.024649 |
| 104156 | 1372634 | 3947613 | 450.297 | 450.14 | -0.157 | 0.024649 |
| 104223 | 1372717 | 3947736 | 451.077 | 450.92 | -0.157 | 0.024649 |
| 106005 | 1420654 | 3955051 | 475.887 | 475.73 | -0.157 | 0.024649 |



|        |         |         |         |        |        |          |
|--------|---------|---------|---------|--------|--------|----------|
| 103364 | 1379695 | 3974464 | 487.927 | 487.77 | -0.157 | 0.024649 |
| 105521 | 1429558 | 3934343 | 493.707 | 493.55 | -0.157 | 0.024649 |
| 104477 | 1373786 | 3952880 | 447.446 | 447.29 | -0.156 | 0.024336 |
| 101093 | 1334598 | 3948162 | 571.716 | 571.56 | -0.156 | 0.024336 |
| 100923 | 1336832 | 3951068 | 433.255 | 433.1  | -0.155 | 0.024025 |
| 100206 | 1358297 | 3966999 | 436.035 | 435.88 | -0.155 | 0.024025 |
| 100177 | 1358265 | 3965758 | 436.835 | 436.68 | -0.155 | 0.024025 |
| 103965 | 1373728 | 3951110 | 446.245 | 446.09 | -0.155 | 0.024025 |
| 101596 | 1352269 | 3969065 | 449.785 | 449.63 | -0.155 | 0.024025 |
| 101847 | 1357624 | 3974186 | 480.125 | 479.97 | -0.155 | 0.024025 |
| 101807 | 1358388 | 3972615 | 445.233 | 445.08 | -0.154 | 0.023716 |
| 103557 | 1376650 | 3968556 | 445.934 | 445.78 | -0.154 | 0.023716 |
| 104211 | 1372630 | 3947585 | 450.454 | 450.3  | -0.154 | 0.023716 |
| 104194 | 1372487 | 3947345 | 451.034 | 450.88 | -0.154 | 0.023716 |
| 106867 | 1420868 | 3964237 | 471.134 | 470.98 | -0.154 | 0.023716 |
| 106250 | 1421811 | 3970581 | 471.824 | 471.67 | -0.154 | 0.023716 |
| 105924 | 1421621 | 3951396 | 477.224 | 477.07 | -0.154 | 0.023716 |
| 105628 | 1429201 | 3938956 | 490.524 | 490.37 | -0.154 | 0.023716 |
| 103819 | 1373875 | 3957195 | 445.733 | 445.58 | -0.153 | 0.023409 |
| 100404 | 1350946 | 3969076 | 454.523 | 454.37 | -0.153 | 0.023409 |
| 106759 | 1421785 | 3971076 | 470.153 | 470    | -0.153 | 0.023409 |
| 105738 | 1424321 | 3942076 | 486.423 | 486.27 | -0.153 | 0.023409 |
| 104461 | 1373767 | 3952311 | 446.222 | 446.07 | -0.152 | 0.023104 |
| 103378 | 1379604 | 3973829 | 473.992 | 473.84 | -0.152 | 0.023104 |
| 100240 | 1358344 | 3968487 | 436.951 | 436.8  | -0.151 | 0.022801 |
| 104447 | 1373755 | 3951941 | 446.011 | 445.86 | -0.151 | 0.022801 |
| 101565 | 1350972 | 3969034 | 452.281 | 452.13 | -0.151 | 0.022801 |
| 106052 | 1420739 | 3957385 | 474.791 | 474.64 | -0.151 | 0.022801 |
| 101114 | 1334954 | 3949101 | 493.661 | 493.51 | -0.151 | 0.022801 |
| 105532 | 1429747 | 3934874 | 493.691 | 493.54 | -0.151 | 0.022801 |
| 103356 | 1379835 | 3974827 | 495.731 | 495.58 | -0.151 | 0.022801 |
| 104204 | 1372580 | 3947498 | 450.65  | 450.5  | -0.15  | 0.0225   |
| 103426 | 1379603 | 3972013 | 453.32  | 453.17 | -0.15  | 0.0225   |
| 106735 | 1421808 | 3972285 | 471.29  | 471.14 | -0.15  | 0.0225   |
| 100653 | 1344799 | 3959460 | 436.999 | 436.85 | -0.149 | 0.022201 |
| 104453 | 1373760 | 3952111 | 446.029 | 445.88 | -0.149 | 0.022201 |
| 104165 | 1372552 | 3947471 | 450.539 | 450.39 | -0.149 | 0.022201 |
| 101494 | 1348439 | 3966039 | 456.859 | 456.71 | -0.149 | 0.022201 |
| 107535 | 1398420 | 3959711 | 457.709 | 457.56 | -0.149 | 0.022201 |
| 106244 | 1421806 | 3970464 | 471.949 | 471.8  | -0.149 | 0.022201 |
| 107007 | 1420577 | 3954791 | 474.869 | 474.72 | -0.149 | 0.022201 |
| 101115 | 1334985 | 3949134 | 489.719 | 489.57 | -0.149 | 0.022201 |
| 101012 | 1334585 | 3948162 | 571.289 | 571.14 | -0.149 | 0.022201 |
| 100602 | 1345817 | 3961277 | 436.848 | 436.7  | -0.148 | 0.021904 |
| 103775 | 1373603 | 3959612 | 444.068 | 443.92 | -0.148 | 0.021904 |
| 104473 | 1373780 | 3952754 | 447.708 | 447.56 | -0.148 | 0.021904 |
| 104196 | 1372506 | 3947374 | 450.808 | 450.66 | -0.148 | 0.021904 |
| 107653 | 1395569 | 3954568 | 458.458 | 458.31 | -0.148 | 0.021904 |
| 105523 | 1429588 | 3934447 | 493.708 | 493.56 | -0.148 | 0.021904 |
| 100670 | 1344438 | 3958814 | 436.858 | 436.71 | -0.147 | 0.021609 |
| 101386 | 1345679 | 3960993 | 436.977 | 436.83 | -0.147 | 0.021609 |
| 104428 | 1373745 | 3951487 | 446.568 | 446.42 | -0.147 | 0.021609 |

|        |         |         |         |        |        |          |
|--------|---------|---------|---------|--------|--------|----------|
| 103462 | 1379537 | 3971022 | 450.037 | 449.89 | -0.147 | 0.021609 |
| 101506 | 1348748 | 3966588 | 458.547 | 458.4  | -0.147 | 0.021609 |
| 105978 | 1420484 | 3953857 | 475.547 | 475.4  | -0.147 | 0.021609 |
| 105647 | 1428578 | 3939495 | 489.557 | 489.41 | -0.147 | 0.021609 |
| 100771 | 1341895 | 3955231 | 432.926 | 432.78 | -0.146 | 0.021316 |
| 103717 | 1374048 | 3961578 | 447.126 | 446.98 | -0.146 | 0.021316 |
| 104162 | 1372579 | 3947516 | 450.466 | 450.32 | -0.146 | 0.021316 |
| 100426 | 1349478 | 3967981 | 459.606 | 459.46 | -0.146 | 0.021316 |
| 101794 | 1358376 | 3972040 | 442.255 | 442.11 | -0.145 | 0.021025 |
| 103755 | 1373895 | 3960144 | 444.245 | 444.1  | -0.145 | 0.021025 |
| 103934 | 1373748 | 3952045 | 446.015 | 445.87 | -0.145 | 0.021025 |
| 104200 | 1372545 | 3947439 | 450.705 | 450.56 | -0.145 | 0.021025 |
| 105646 | 1428607 | 3939470 | 489.645 | 489.5  | -0.145 | 0.021025 |
| 101865 | 1357020 | 3974784 | 493.835 | 493.69 | -0.145 | 0.021025 |
| 101356 | 1345059 | 3959895 | 436.794 | 436.65 | -0.144 | 0.020736 |
| 100185 | 1358274 | 3966102 | 438.894 | 438.75 | -0.144 | 0.020736 |
| 103624 | 1375001 | 3965399 | 446.074 | 445.93 | -0.144 | 0.020736 |
| 103692 | 1374396 | 3962760 | 448.754 | 448.61 | -0.144 | 0.020736 |
| 104390 | 1373723 | 3950664 | 452.234 | 452.09 | -0.144 | 0.020736 |
| 107665 | 1395381 | 3953933 | 459.174 | 459.03 | -0.144 | 0.020736 |
| 100711 | 1343596 | 3957316 | 433.023 | 432.88 | -0.143 | 0.020449 |
| 100556 | 1346734 | 3962977 | 437.323 | 437.18 | -0.143 | 0.020449 |
| 101440 | 1347023 | 3963501 | 439.443 | 439.3  | -0.143 | 0.020449 |
| 103747 | 1374013 | 3960381 | 445.123 | 444.98 | -0.143 | 0.020449 |
| 103811 | 1373818 | 3958129 | 445.713 | 445.57 | -0.143 | 0.020449 |
| 103435 | 1379601 | 3971886 | 452.433 | 452.29 | -0.143 | 0.020449 |
| 106258 | 1421800 | 3970801 | 471.143 | 471    | -0.143 | 0.020449 |
| 106959 | 1420712 | 3956974 | 474.993 | 474.85 | -0.143 | 0.020449 |
| 105488 | 1429250 | 3933302 | 494.423 | 494.28 | -0.143 | 0.020449 |
| 103801 | 1373755 | 3958568 | 445.952 | 445.81 | -0.142 | 0.020164 |
| 103926 | 1373760 | 3952469 | 446.962 | 446.82 | -0.142 | 0.020164 |
| 103524 | 1377790 | 3969294 | 447.752 | 447.61 | -0.142 | 0.020164 |
| 104208 | 1372609 | 3947549 | 450.502 | 450.36 | -0.142 | 0.020164 |
| 104189 | 1372453 | 3947294 | 451.082 | 450.94 | -0.142 | 0.020164 |
| 101822 | 1358290 | 3973377 | 452.712 | 452.57 | -0.142 | 0.020164 |
| 106191 | 1421180 | 3967712 | 470.132 | 469.99 | -0.142 | 0.020164 |
| 106798 | 1421155 | 3967702 | 470.672 | 470.53 | -0.142 | 0.020164 |
| 106736 | 1421807 | 3972245 | 471.312 | 471.17 | -0.142 | 0.020164 |
| 106287 | 1421826 | 3972277 | 471.592 | 471.45 | -0.142 | 0.020164 |
| 100992 | 1334831 | 3948944 | 511.412 | 511.27 | -0.142 | 0.020164 |
| 100920 | 1336925 | 3951164 | 433.471 | 433.33 | -0.141 | 0.019881 |
| 100917 | 1337023 | 3951257 | 433.491 | 433.35 | -0.141 | 0.019881 |
| 101344 | 1344719 | 3959288 | 437.251 | 437.11 | -0.141 | 0.019881 |
| 100532 | 1347209 | 3963914 | 440.731 | 440.59 | -0.141 | 0.019881 |
| 103460 | 1379558 | 3971108 | 449.661 | 449.52 | -0.141 | 0.019881 |
| 107546 | 1397887 | 3959465 | 457.521 | 457.38 | -0.141 | 0.019881 |
| 101740 | 1358361 | 3969496 | 435.88  | 435.74 | -0.14  | 0.0196   |
| 103799 | 1373745 | 3958654 | 445.91  | 445.77 | -0.14  | 0.0196   |
| 101563 | 1350898 | 3969019 | 452.37  | 452.23 | -0.14  | 0.0196   |
| 107668 | 1395344 | 3953807 | 459.48  | 459.34 | -0.14  | 0.0196   |
| 100964 | 1335617 | 3949808 | 436.109 | 435.97 | -0.139 | 0.019321 |
| 100965 | 1335586 | 3949776 | 436.689 | 436.55 | -0.139 | 0.019321 |

|        |         |         |         |        |        |          |
|--------|---------|---------|---------|--------|--------|----------|
| 103824 | 1373873 | 3956968 | 445.459 | 445.32 | -0.139 | 0.019321 |
| 103542 | 1377196 | 3968910 | 447.369 | 447.23 | -0.139 | 0.019321 |
| 101571 | 1351206 | 3969067 | 451.499 | 451.36 | -0.139 | 0.019321 |
| 106335 | 1421876 | 3974849 | 484.289 | 484.15 | -0.139 | 0.019321 |
| 105653 | 1428336 | 3939706 | 488.969 | 488.83 | -0.139 | 0.019321 |
| 100955 | 1335880 | 3950081 | 433.978 | 433.84 | -0.138 | 0.019044 |
| 103766 | 1373555 | 3959901 | 443.538 | 443.4  | -0.138 | 0.019044 |
| 103846 | 1373849 | 3956059 | 445.768 | 445.63 | -0.138 | 0.019044 |
| 103967 | 1373727 | 3951053 | 446.288 | 446.15 | -0.138 | 0.019044 |
| 103681 | 1374642 | 3963192 | 448.888 | 448.75 | -0.138 | 0.019044 |
| 104182 | 1372400 | 3947287 | 451.018 | 450.88 | -0.138 | 0.019044 |
| 101491 | 1348355 | 3965889 | 456.478 | 456.34 | -0.138 | 0.019044 |
| 106139 | 1420896 | 3964737 | 470.398 | 470.26 | -0.138 | 0.019044 |
| 106805 | 1421039 | 3967452 | 470.818 | 470.68 | -0.138 | 0.019044 |
| 106243 | 1421804 | 3970446 | 472.048 | 471.91 | -0.138 | 0.019044 |
| 103365 | 1379683 | 3974419 | 487.088 | 486.95 | -0.138 | 0.019044 |
| 105520 | 1429549 | 3934312 | 493.418 | 493.28 | -0.138 | 0.019044 |
| 101004 | 1334688 | 3948469 | 551.988 | 551.85 | -0.138 | 0.019044 |
| 101301 | 1343818 | 3957679 | 434.347 | 434.21 | -0.137 | 0.018769 |
| 101787 | 1358365 | 3971719 | 441.107 | 440.97 | -0.137 | 0.018769 |
| 101129 | 1335418 | 3949585 | 442.747 | 442.61 | -0.137 | 0.018769 |
| 103797 | 1373736 | 3958738 | 445.647 | 445.51 | -0.137 | 0.018769 |
| 104412 | 1373738 | 3951153 | 446.467 | 446.33 | -0.137 | 0.018769 |
| 104466 | 1373774 | 3952549 | 447.407 | 447.27 | -0.137 | 0.018769 |
| 104163 | 1372570 | 3947501 | 450.467 | 450.33 | -0.137 | 0.018769 |
| 107614 | 1396164 | 3956590 | 456.197 | 456.06 | -0.137 | 0.018769 |
| 107631 | 1395920 | 3955766 | 456.777 | 456.64 | -0.137 | 0.018769 |
| 106273 | 1421810 | 3971524 | 469.937 | 469.8  | -0.137 | 0.018769 |
| 106242 | 1421802 | 3970428 | 472.017 | 471.88 | -0.137 | 0.018769 |
| 105742 | 1424171 | 3942242 | 486.038 | 485.9  | -0.137 | 0.018769 |
| 103785 | 1373666 | 3959226 | 444.016 | 443.88 | -0.136 | 0.018496 |
| 100977 | 1335223 | 3949400 | 459.196 | 459.06 | -0.136 | 0.018496 |
| 106772 | 1421775 | 3970485 | 472.016 | 471.88 | -0.136 | 0.018496 |
| 105482 | 1429186 | 3933183 | 494.556 | 494.42 | -0.136 | 0.018496 |
| 101002 | 1334710 | 3948548 | 545.286 | 545.15 | -0.136 | 0.018496 |
| 101792 | 1358373 | 3971952 | 442.045 | 441.91 | -0.135 | 0.018225 |
| 103981 | 1373715 | 3950693 | 450.755 | 450.62 | -0.135 | 0.018225 |
| 104188 | 1372447 | 3947286 | 451.055 | 450.92 | -0.135 | 0.018225 |
| 101489 | 1348294 | 3965778 | 456.115 | 455.98 | -0.135 | 0.018225 |
| 101511 | 1348876 | 3966818 | 459.205 | 459.07 | -0.135 | 0.018225 |
| 101540 | 1349496 | 3967926 | 459.325 | 459.19 | -0.135 | 0.018225 |
| 105942 | 1421353 | 3952264 | 475.185 | 475.05 | -0.135 | 0.018225 |
| 105736 | 1424390 | 3942012 | 486.345 | 486.21 | -0.135 | 0.018225 |
| 100810 | 1340794 | 3953970 | 432.824 | 432.69 | -0.134 | 0.017956 |
| 100957 | 1335824 | 3950023 | 434.374 | 434.24 | -0.134 | 0.017956 |
| 103849 | 1373846 | 3955940 | 445.824 | 445.69 | -0.134 | 0.017956 |
| 105852 | 1423019 | 3947743 | 477.344 | 477.21 | -0.134 | 0.017956 |
| 105638 | 1428887 | 3939227 | 489.924 | 489.79 | -0.134 | 0.017956 |
| 105518 | 1429532 | 3934257 | 493.274 | 493.14 | -0.134 | 0.017956 |
| 100938 | 1336396 | 3950615 | 432.953 | 432.82 | -0.133 | 0.017689 |
| 100210 | 1358302 | 3967180 | 435.673 | 435.54 | -0.133 | 0.017689 |
| 100157 | 1358226 | 3964241 | 435.833 | 435.7  | -0.133 | 0.017689 |

|        |         |         |         |        |        |          |
|--------|---------|---------|---------|--------|--------|----------|
| 101798 | 1358380 | 3972213 | 443.083 | 442.95 | -0.133 | 0.017689 |
| 103733 | 1374031 | 3960906 | 445.803 | 445.67 | -0.133 | 0.017689 |
| 104432 | 1373747 | 3951567 | 446.173 | 446.04 | -0.133 | 0.017689 |
| 100366 | 1352571 | 3969068 | 447.474 | 447.34 | -0.133 | 0.017689 |
| 105702 | 1426285 | 3941261 | 487.423 | 487.29 | -0.133 | 0.017689 |
| 100644 | 1344998 | 3959817 | 436.812 | 436.68 | -0.132 | 0.017424 |
| 101346 | 1344763 | 3959367 | 437.112 | 436.98 | -0.132 | 0.017424 |
| 104416 | 1373740 | 3951237 | 446.712 | 446.58 | -0.132 | 0.017424 |
| 104207 | 1372602 | 3947537 | 450.542 | 450.41 | -0.132 | 0.017424 |
| 104183 | 1372405 | 3947281 | 451.242 | 451.11 | -0.132 | 0.017424 |
| 100476 | 1348409 | 3966061 | 456.812 | 456.68 | -0.132 | 0.017424 |
| 101512 | 1348897 | 3966856 | 459.342 | 459.21 | -0.132 | 0.017424 |
| 106279 | 1421817 | 3971862 | 471.542 | 471.41 | -0.132 | 0.017424 |
| 107011 | 1420542 | 3954668 | 475.022 | 474.89 | -0.132 | 0.017424 |
| 101116 | 1335017 | 3949168 | 485.552 | 485.42 | -0.132 | 0.017424 |
| 101127 | 1335357 | 3949522 | 447.161 | 447.03 | -0.131 | 0.017161 |
| 103716 | 1374049 | 3961623 | 447.541 | 447.41 | -0.131 | 0.017161 |
| 107600 | 1396360 | 3957261 | 457.361 | 457.23 | -0.131 | 0.017161 |
| 106261 | 1421802 | 3970918 | 470.981 | 470.85 | -0.131 | 0.017161 |
| 105992 | 1420362 | 3954197 | 474.291 | 474.16 | -0.131 | 0.017161 |
| 107012 | 1420534 | 3954643 | 475.031 | 474.9  | -0.131 | 0.017161 |
| 106722 | 1421822 | 3972951 | 475.211 | 475.08 | -0.131 | 0.017161 |
| 105698 | 1426497 | 3941166 | 487.831 | 487.7  | -0.131 | 0.017161 |
| 101166 | 1336629 | 3950837 | 432.65  | 432.52 | -0.13  | 0.0169   |
| 101179 | 1337025 | 3951241 | 433.19  | 433.06 | -0.13  | 0.0169   |
| 101290 | 1343344 | 3956909 | 433.45  | 433.32 | -0.13  | 0.0169   |
| 100131 | 1358209 | 3963335 | 435.18  | 435.05 | -0.13  | 0.0169   |
| 101730 | 1358362 | 3969117 | 436.48  | 436.35 | -0.13  | 0.0169   |
| 103759 | 1373782 | 3960076 | 444.26  | 444.13 | -0.13  | 0.0169   |
| 104504 | 1373826 | 3954242 | 447.2   | 447.07 | -0.13  | 0.0169   |
| 103917 | 1373770 | 3952784 | 447.7   | 447.57 | -0.13  | 0.0169   |
| 103510 | 1378102 | 3969502 | 450.02  | 449.89 | -0.13  | 0.0169   |
| 100410 | 1350767 | 3969033 | 455.01  | 454.88 | -0.13  | 0.0169   |
| 106265 | 1421803 | 3971096 | 470.221 | 470.09 | -0.13  | 0.0169   |
| 107017 | 1420325 | 3954157 | 474.55  | 474.42 | -0.13  | 0.0169   |
| 105967 | 1420840 | 3953475 | 475.34  | 475.21 | -0.13  | 0.0169   |
| 105537 | 1429865 | 3935106 | 494.05  | 493.92 | -0.13  | 0.0169   |
| 101617 | 1353196 | 3969030 | 445.049 | 444.92 | -0.129 | 0.016641 |
| 107454 | 1402364 | 3961364 | 461.759 | 461.63 | -0.129 | 0.016641 |
| 106750 | 1421794 | 3971562 | 470.109 | 469.98 | -0.129 | 0.016641 |
| 106184 | 1421062 | 3967461 | 470.109 | 469.98 | -0.129 | 0.016641 |
| 106231 | 1421784 | 3970046 | 471.799 | 471.67 | -0.129 | 0.016641 |
| 106246 | 1421809 | 3970499 | 471.949 | 471.82 | -0.129 | 0.016641 |
| 101422 | 1346631 | 3962719 | 436.898 | 436.77 | -0.128 | 0.016384 |
| 101519 | 1349064 | 3967157 | 460.168 | 460.04 | -0.128 | 0.016384 |
| 101836 | 1357958 | 3973899 | 467.098 | 466.97 | -0.128 | 0.016384 |
| 106011 | 1420690 | 3955315 | 475.688 | 475.56 | -0.128 | 0.016384 |
| 101013 | 1334566 | 3948128 | 572.108 | 571.98 | -0.128 | 0.016384 |
| 101397 | 1345906 | 3961401 | 436.907 | 436.78 | -0.127 | 0.016129 |
| 101788 | 1358367 | 3971767 | 441.257 | 441.13 | -0.127 | 0.016129 |
| 103831 | 1373866 | 3956664 | 446.037 | 445.91 | -0.127 | 0.016129 |
| 103540 | 1377265 | 3968954 | 447.417 | 447.29 | -0.127 | 0.016129 |

|        |         |         |         |        |        |          |
|--------|---------|---------|---------|--------|--------|----------|
| 106756 | 1421789 | 3971234 | 469.767 | 469.64 | -0.127 | 0.016129 |
| 106277 | 1421815 | 3971737 | 471.427 | 471.3  | -0.127 | 0.016129 |
| 101102 | 1334740 | 3948614 | 539.147 | 539.02 | -0.127 | 0.016129 |
| 100107 | 1358177 | 3962417 | 436.756 | 436.63 | -0.126 | 0.015876 |
| 103778 | 1373621 | 3959500 | 443.776 | 443.65 | -0.126 | 0.015876 |
| 103932 | 1373750 | 3952116 | 446.056 | 445.93 | -0.126 | 0.015876 |
| 100988 | 1334919 | 3949082 | 497.486 | 497.36 | -0.126 | 0.015876 |
| 101165 | 1336600 | 3950806 | 432.695 | 432.57 | -0.125 | 0.015625 |
| 100896 | 1337774 | 3951750 | 432.885 | 432.76 | -0.125 | 0.015625 |
| 100751 | 1342491 | 3955912 | 433.215 | 433.09 | -0.125 | 0.015625 |
| 100599 | 1345882 | 3961394 | 436.735 | 436.61 | -0.125 | 0.015625 |
| 103582 | 1375910 | 3967765 | 443.365 | 443.24 | -0.125 | 0.015625 |
| 103627 | 1374993 | 3965264 | 445.555 | 445.43 | -0.125 | 0.015625 |
| 104181 | 1372398 | 3947297 | 450.495 | 450.37 | -0.125 | 0.015625 |
| 101580 | 1351570 | 3969072 | 451.145 | 451.02 | -0.125 | 0.015625 |
| 100412 | 1349849 | 3968485 | 458.435 | 458.31 | -0.125 | 0.015625 |
| 106136 | 1420892 | 3964595 | 470.485 | 470.36 | -0.125 | 0.015625 |
| 105630 | 1429149 | 3939001 | 490.315 | 490.19 | -0.125 | 0.015625 |
| 101101 | 1334730 | 3948574 | 542.535 | 542.41 | -0.125 | 0.015625 |
| 100137 | 1358212 | 3963499 | 434.934 | 434.81 | -0.124 | 0.015376 |
| 100051 | 1357692 | 3960014 | 436.344 | 436.22 | -0.124 | 0.015376 |
| 103573 | 1376141 | 3968073 | 445.184 | 445.06 | -0.124 | 0.015376 |
| 103572 | 1376169 | 3968110 | 445.704 | 445.58 | -0.124 | 0.015376 |
| 103637 | 1374971 | 3964842 | 445.914 | 445.79 | -0.124 | 0.015376 |
| 104161 | 1372588 | 3947532 | 450.424 | 450.3  | -0.124 | 0.015376 |
| 107570 | 1396881 | 3958715 | 459.954 | 459.83 | -0.124 | 0.015376 |
| 106289 | 1421827 | 3972360 | 472.324 | 472.2  | -0.124 | 0.015376 |
| 106729 | 1421814 | 3972593 | 474.004 | 473.88 | -0.124 | 0.015376 |
| 105954 | 1421157 | 3952871 | 475.284 | 475.16 | -0.124 | 0.015376 |
| 103370 | 1379635 | 3974192 | 482.704 | 482.58 | -0.124 | 0.015376 |
| 100991 | 1334850 | 3948981 | 507.814 | 507.69 | -0.124 | 0.015376 |
| 101142 | 1335860 | 3950042 | 434.093 | 433.97 | -0.123 | 0.015129 |
| 101385 | 1345663 | 3960965 | 437.013 | 436.89 | -0.123 | 0.015129 |
| 101784 | 1358361 | 3971580 | 440.573 | 440.45 | -0.123 | 0.015129 |
| 101806 | 1358388 | 3972570 | 444.953 | 444.83 | -0.123 | 0.015129 |
| 104408 | 1373737 | 3951069 | 446.263 | 446.14 | -0.123 | 0.015129 |
| 101457 | 1347498 | 3964357 | 447.493 | 447.37 | -0.123 | 0.015129 |
| 103459 | 1379566 | 3971150 | 449.523 | 449.4  | -0.123 | 0.015129 |
| 103463 | 1379525 | 3970979 | 450.103 | 449.98 | -0.123 | 0.015129 |
| 106770 | 1421778 | 3970600 | 471.843 | 471.72 | -0.123 | 0.015129 |
| 106046 | 1420732 | 3957070 | 474.753 | 474.63 | -0.123 | 0.015129 |
| 105941 | 1421366 | 3952225 | 475.273 | 475.15 | -0.123 | 0.015129 |
| 105610 | 1429789 | 3938436 | 490.673 | 490.55 | -0.123 | 0.015129 |
| 105451 | 1429154 | 3931906 | 495.383 | 495.26 | -0.123 | 0.015129 |
| 101014 | 1334545 | 3948094 | 572.643 | 572.52 | -0.123 | 0.015129 |
| 100721 | 1343350 | 3956941 | 433.082 | 432.96 | -0.122 | 0.014884 |
| 100039 | 1357296 | 3959813 | 436.342 | 436.22 | -0.122 | 0.014884 |
| 100041 | 1357365 | 3959848 | 436.742 | 436.62 | -0.122 | 0.014884 |
| 103923 | 1373763 | 3952572 | 447.572 | 447.45 | -0.122 | 0.014884 |
| 104471 | 1373778 | 3952672 | 447.672 | 447.55 | -0.122 | 0.014884 |
| 101554 | 1349828 | 3968399 | 456.642 | 456.52 | -0.122 | 0.014884 |
| 101111 | 1334874 | 3948996 | 504.902 | 504.78 | -0.122 | 0.014884 |

|        |         |         |         |        |        |          |
|--------|---------|---------|---------|--------|--------|----------|
| 101304 | 1343881 | 3957792 | 434.741 | 434.62 | -0.121 | 0.014641 |
| 101759 | 1358381 | 3970599 | 439.601 | 439.48 | -0.121 | 0.014641 |
| 103639 | 1374967 | 3964760 | 445.661 | 445.54 | -0.121 | 0.014641 |
| 103464 | 1379512 | 3970936 | 450.171 | 450.05 | -0.121 | 0.014641 |
| 105517 | 1429517 | 3934208 | 493.091 | 492.97 | -0.121 | 0.014641 |
| 100719 | 1343402 | 3957015 | 432.88  | 432.76 | -0.12  | 0.0144   |
| 101369 | 1345356 | 3960425 | 437.25  | 437.13 | -0.12  | 0.0144   |
| 101452 | 1347338 | 3964088 | 441.72  | 441.6  | -0.12  | 0.0144   |
| 103587 | 1375825 | 3967651 | 442.93  | 442.81 | -0.12  | 0.0144   |
| 101608 | 1352806 | 3969045 | 445.66  | 445.54 | -0.12  | 0.0144   |
| 101567 | 1351047 | 3969047 | 452.12  | 452    | -0.12  | 0.0144   |
| 100459 | 1348767 | 3966702 | 458.84  | 458.72 | -0.12  | 0.0144   |
| 100450 | 1348960 | 3967048 | 459.95  | 459.83 | -0.12  | 0.0144   |
| 106753 | 1421792 | 3971399 | 469.591 | 469.47 | -0.12  | 0.0144   |
| 101158 | 1336398 | 3950593 | 432.849 | 432.73 | -0.119 | 0.014161 |
| 100933 | 1336537 | 3950762 | 432.919 | 432.8  | -0.119 | 0.014161 |
| 100949 | 1336050 | 3950257 | 433.199 | 433.08 | -0.119 | 0.014161 |
| 101735 | 1358364 | 3969295 | 435.829 | 435.71 | -0.119 | 0.014161 |
| 101780 | 1358362 | 3971411 | 440.039 | 439.92 | -0.119 | 0.014161 |
| 103726 | 1374038 | 3961199 | 446.109 | 445.99 | -0.119 | 0.014161 |
| 104168 | 1372527 | 3947427 | 450.499 | 450.38 | -0.119 | 0.014161 |
| 101510 | 1348854 | 3966780 | 459.079 | 458.96 | -0.119 | 0.014161 |
| 106276 | 1421813 | 3971695 | 471.249 | 471.13 | -0.119 | 0.014161 |
| 105543 | 1429963 | 3935293 | 493.489 | 493.37 | -0.119 | 0.014161 |
| 101032 | 1333927 | 3947633 | 555.479 | 555.36 | -0.119 | 0.014161 |
| 101336 | 1344548 | 3958982 | 436.718 | 436.6  | -0.118 | 0.013924 |
| 100181 | 1358270 | 3965932 | 437.138 | 437.02 | -0.118 | 0.013924 |
| 103571 | 1376198 | 3968146 | 446.058 | 445.94 | -0.118 | 0.013924 |
| 101819 | 1358344 | 3973205 | 450.348 | 450.23 | -0.118 | 0.013924 |
| 101484 | 1348171 | 3965557 | 455.538 | 455.42 | -0.118 | 0.013924 |
| 101544 | 1349576 | 3968064 | 458.178 | 458.06 | -0.118 | 0.013924 |
| 101537 | 1349443 | 3967831 | 459.368 | 459.25 | -0.118 | 0.013924 |
| 106763 | 1421782 | 3970891 | 470.978 | 470.86 | -0.118 | 0.013924 |
| 106953 | 1420718 | 3957275 | 474.878 | 474.76 | -0.118 | 0.013924 |
| 101153 | 1336242 | 3950436 | 432.867 | 432.75 | -0.117 | 0.013689 |
| 101802 | 1358385 | 3972390 | 443.837 | 443.72 | -0.117 | 0.013689 |
| 103682 | 1374621 | 3963155 | 448.797 | 448.68 | -0.117 | 0.013689 |
| 101526 | 1349236 | 3967465 | 460.097 | 459.98 | -0.117 | 0.013689 |
| 105991 | 1420340 | 3954150 | 474.477 | 474.36 | -0.117 | 0.013689 |
| 106954 | 1420717 | 3957238 | 474.917 | 474.8  | -0.117 | 0.013689 |
| 106969 | 1420701 | 3956555 | 474.937 | 474.82 | -0.117 | 0.013689 |
| 100953 | 1335936 | 3950139 | 433.746 | 433.63 | -0.116 | 0.013456 |
| 101732 | 1358363 | 3969185 | 436.086 | 435.97 | -0.116 | 0.013456 |
| 101347 | 1344785 | 3959406 | 437.006 | 436.89 | -0.116 | 0.013456 |
| 101781 | 1358361 | 3971452 | 440.256 | 440.14 | -0.116 | 0.013456 |
| 101449 | 1347270 | 3963967 | 440.626 | 440.51 | -0.116 | 0.013456 |
| 104486 | 1373803 | 3953375 | 447.366 | 447.25 | -0.116 | 0.013456 |
| 100368 | 1352482 | 3969070 | 448.176 | 448.06 | -0.116 | 0.013456 |
| 100392 | 1351442 | 3969118 | 452.496 | 452.38 | -0.116 | 0.013456 |
| 105993 | 1420373 | 3954220 | 474.296 | 474.18 | -0.116 | 0.013456 |
| 105699 | 1426456 | 3941187 | 487.816 | 487.7  | -0.116 | 0.013456 |
| 100926 | 1336740 | 3950973 | 432.865 | 432.75 | -0.115 | 0.013225 |

|        |         |         |         |        |        |          |
|--------|---------|---------|---------|--------|--------|----------|
| 100935 | 1336481 | 3950703 | 432.875 | 432.76 | -0.115 | 0.013225 |
| 100950 | 1336021 | 3950227 | 433.305 | 433.19 | -0.115 | 0.013225 |
| 100869 | 1338841 | 3952219 | 433.425 | 433.31 | -0.115 | 0.013225 |
| 101359 | 1345125 | 3960012 | 436.845 | 436.73 | -0.115 | 0.013225 |
| 101342 | 1344676 | 3959211 | 437.105 | 436.99 | -0.115 | 0.013225 |
| 103768 | 1373565 | 3959845 | 443.715 | 443.6  | -0.115 | 0.013225 |
| 103772 | 1373586 | 3959717 | 443.795 | 443.68 | -0.115 | 0.013225 |
| 103718 | 1374047 | 3961534 | 446.735 | 446.62 | -0.115 | 0.013225 |
| 104397 | 1373730 | 3950823 | 447.055 | 446.94 | -0.115 | 0.013225 |
| 103708 | 1374094 | 3962044 | 449.335 | 449.22 | -0.115 | 0.013225 |
| 103988 | 1373705 | 3950548 | 454.255 | 454.14 | -0.115 | 0.013225 |
| 106760 | 1421785 | 3971038 | 470.215 | 470.1  | -0.115 | 0.013225 |
| 106274 | 1421811 | 3971567 | 470.225 | 470.11 | -0.115 | 0.013225 |
| 100217 | 1358310 | 3967489 | 435.464 | 435.35 | -0.114 | 0.012996 |
| 101777 | 1358369 | 3971301 | 439.634 | 439.52 | -0.114 | 0.012996 |
| 104445 | 1373754 | 3951882 | 445.984 | 445.87 | -0.114 | 0.012996 |
| 104448 | 1373756 | 3951970 | 446.074 | 445.96 | -0.114 | 0.012996 |
| 104485 | 1373802 | 3953330 | 447.104 | 446.99 | -0.114 | 0.012996 |
| 100425 | 1349501 | 3968021 | 459.734 | 459.62 | -0.114 | 0.012996 |
| 106766 | 1421780 | 3970784 | 471.124 | 471.01 | -0.114 | 0.012996 |
| 105545 | 1429983 | 3935330 | 493.374 | 493.26 | -0.114 | 0.012996 |
| 100990 | 1334871 | 3949016 | 504.334 | 504.22 | -0.114 | 0.012996 |
| 100704 | 1343747 | 3957579 | 433.973 | 433.86 | -0.113 | 0.012769 |
| 101454 | 1347406 | 3964205 | 443.623 | 443.51 | -0.113 | 0.012769 |
| 103818 | 1373876 | 3957241 | 445.963 | 445.85 | -0.113 | 0.012769 |
| 104465 | 1373773 | 3952528 | 447.143 | 447.03 | -0.113 | 0.012769 |
| 101501 | 1348601 | 3966328 | 457.803 | 457.69 | -0.113 | 0.012769 |
| 100461 | 1348723 | 3966624 | 458.603 | 458.49 | -0.113 | 0.012769 |
| 100414 | 1349791 | 3968424 | 458.603 | 458.49 | -0.113 | 0.012769 |
| 107016 | 1420350 | 3954209 | 474.423 | 474.31 | -0.113 | 0.012769 |
| 106003 | 1420625 | 3954905 | 475.933 | 475.82 | -0.113 | 0.012769 |
| 105549 | 1430041 | 3935439 | 493.503 | 493.39 | -0.113 | 0.012769 |
| 100944 | 1336193 | 3950406 | 432.932 | 432.82 | -0.112 | 0.012544 |
| 100079 | 1358146 | 3961207 | 435.932 | 435.82 | -0.112 | 0.012544 |
| 101402 | 1346025 | 3961612 | 436.832 | 436.72 | -0.112 | 0.012544 |
| 103802 | 1373761 | 3958524 | 445.682 | 445.57 | -0.112 | 0.012544 |
| 103841 | 1373855 | 3956259 | 445.772 | 445.66 | -0.112 | 0.012544 |
| 103887 | 1373806 | 3954009 | 447.112 | 447    | -0.112 | 0.012544 |
| 103673 | 1374786 | 3963472 | 447.872 | 447.76 | -0.112 | 0.012544 |
| 103493 | 1378703 | 3969902 | 452.092 | 451.98 | -0.112 | 0.012544 |
| 101529 | 1349300 | 3967578 | 459.792 | 459.68 | -0.112 | 0.012544 |
| 106061 | 1420746 | 3957850 | 474.582 | 474.47 | -0.112 | 0.012544 |
| 105741 | 1424199 | 3942208 | 486.212 | 486.1  | -0.112 | 0.012544 |
| 105460 | 1429122 | 3932291 | 495.052 | 494.94 | -0.112 | 0.012544 |
| 101146 | 1335988 | 3950174 | 433.471 | 433.36 | -0.111 | 0.012321 |
| 100156 | 1358225 | 3964200 | 435.521 | 435.41 | -0.111 | 0.012321 |
| 101733 | 1358364 | 3969220 | 436.061 | 435.95 | -0.111 | 0.012321 |
| 100234 | 1358332 | 3968235 | 437.951 | 437.84 | -0.111 | 0.012321 |
| 100540 | 1347048 | 3963596 | 440.121 | 440.01 | -0.111 | 0.012321 |
| 103590 | 1375706 | 3967497 | 442.611 | 442.5  | -0.111 | 0.012321 |
| 103515 | 1377959 | 3969406 | 448.902 | 448.79 | -0.111 | 0.012321 |
| 101507 | 1348769 | 3966627 | 458.601 | 458.49 | -0.111 | 0.012321 |

|        |         |         |         |        |        |          |
|--------|---------|---------|---------|--------|--------|----------|
| 106740 | 1421804 | 3972040 | 471.411 | 471.3  | -0.111 | 0.012321 |
| 105925 | 1421608 | 3951437 | 477.121 | 477.01 | -0.111 | 0.012321 |
| 105497 | 1429316 | 3933592 | 492.971 | 492.86 | -0.111 | 0.012321 |
| 100086 | 1358154 | 3961512 | 435.02  | 434.91 | -0.11  | 0.0121   |
| 103919 | 1373767 | 3952711 | 447.68  | 447.57 | -0.11  | 0.0121   |
| 106325 | 1421865 | 3974286 | 480.5   | 480.39 | -0.11  | 0.0121   |
| 100945 | 1336164 | 3950376 | 432.909 | 432.8  | -0.109 | 0.011881 |
| 100963 | 1335648 | 3949840 | 435.739 | 435.63 | -0.109 | 0.011881 |
| 100078 | 1358145 | 3961164 | 436.069 | 435.96 | -0.109 | 0.011881 |
| 100633 | 1345212 | 3960208 | 436.749 | 436.64 | -0.109 | 0.011881 |
| 100230 | 1358323 | 3968063 | 438.119 | 438.01 | -0.109 | 0.011881 |
| 104484 | 1373800 | 3953238 | 446.719 | 446.61 | -0.109 | 0.011881 |
| 103450 | 1379601 | 3971512 | 449.989 | 449.88 | -0.109 | 0.011881 |
| 103367 | 1379661 | 3974327 | 485.069 | 484.96 | -0.109 | 0.011881 |
| 101010 | 1334619 | 3948235 | 568.629 | 568.52 | -0.109 | 0.011881 |
| 100553 | 1346785 | 3963073 | 438.058 | 437.95 | -0.108 | 0.011664 |
| 101443 | 1347100 | 3963650 | 439.938 | 439.83 | -0.108 | 0.011664 |
| 104197 | 1372516 | 3947389 | 450.738 | 450.63 | -0.108 | 0.011664 |
| 107531 | 1398616 | 3959798 | 458.128 | 458.02 | -0.108 | 0.011664 |
| 107555 | 1397470 | 3959258 | 458.768 | 458.66 | -0.108 | 0.011664 |
| 106754 | 1421791 | 3971357 | 469.688 | 469.58 | -0.108 | 0.011664 |
| 106840 | 1420897 | 3965621 | 470.868 | 470.76 | -0.108 | 0.011664 |
| 105964 | 1420909 | 3953374 | 475.358 | 475.25 | -0.108 | 0.011664 |
| 105751 | 1423924 | 3942655 | 485.098 | 484.99 | -0.108 | 0.011664 |
| 101007 | 1334656 | 3948352 | 561.628 | 561.52 | -0.108 | 0.011664 |
| 100954 | 1335908 | 3950110 | 433.917 | 433.81 | -0.107 | 0.011449 |
| 103854 | 1373841 | 3955745 | 446.107 | 446    | -0.107 | 0.011449 |
| 103715 | 1374051 | 3961667 | 448.027 | 447.92 | -0.107 | 0.011449 |
| 100371 | 1352346 | 3969075 | 449.107 | 449    | -0.107 | 0.011449 |
| 101830 | 1358124 | 3973701 | 459.527 | 459.42 | -0.107 | 0.011449 |
| 101107 | 1334804 | 3948844 | 519.697 | 519.59 | -0.107 | 0.011449 |
| 100893 | 1337888 | 3951800 | 432.676 | 432.57 | -0.106 | 0.011236 |
| 101731 | 1358363 | 3969151 | 436.396 | 436.29 | -0.106 | 0.011236 |
| 100598 | 1345904 | 3961432 | 436.897 | 436.79 | -0.106 | 0.011236 |
| 101604 | 1352629 | 3969052 | 447.066 | 446.96 | -0.106 | 0.011236 |
| 103619 | 1375014 | 3965639 | 448.496 | 448.39 | -0.106 | 0.011236 |
| 104201 | 1372554 | 3947454 | 450.706 | 450.6  | -0.106 | 0.011236 |
| 101575 | 1351366 | 3969073 | 451.036 | 450.93 | -0.106 | 0.011236 |
| 103432 | 1379601 | 3971912 | 452.666 | 452.56 | -0.106 | 0.011236 |
| 100462 | 1348701 | 3966585 | 458.536 | 458.43 | -0.106 | 0.011236 |
| 107667 | 1395357 | 3953850 | 459.376 | 459.27 | -0.106 | 0.011236 |
| 107567 | 1396980 | 3958841 | 459.786 | 459.68 | -0.106 | 0.011236 |
| 103372 | 1379622 | 3974101 | 480.776 | 480.67 | -0.106 | 0.011236 |
| 100924 | 1336801 | 3951036 | 433.065 | 432.96 | -0.105 | 0.011025 |
| 100958 | 1335796 | 3949994 | 434.565 | 434.46 | -0.105 | 0.011025 |
| 100068 | 1358134 | 3960726 | 436.865 | 436.76 | -0.105 | 0.011025 |
| 100611 | 1345630 | 3960942 | 437.025 | 436.92 | -0.105 | 0.011025 |
| 101744 | 1358365 | 3969977 | 437.925 | 437.82 | -0.105 | 0.011025 |
| 103872 | 1373822 | 3954740 | 446.185 | 446.08 | -0.105 | 0.011025 |
| 107618 | 1396106 | 3956396 | 456.615 | 456.51 | -0.105 | 0.011025 |
| 101527 | 1349258 | 3967503 | 459.965 | 459.86 | -0.105 | 0.011025 |
| 105963 | 1420955 | 3953299 | 475.485 | 475.38 | -0.105 | 0.011025 |



|        |         |         |         |        |        |          |
|--------|---------|---------|---------|--------|--------|----------|
| 104418 | 1373742 | 3951281 | 446.784 | 446.68 | -0.104 | 0.010816 |
| 104169 | 1372519 | 3947414 | 450.464 | 450.36 | -0.104 | 0.010816 |
| 103609 | 1375267 | 3966777 | 456.315 | 456.21 | -0.104 | 0.010816 |
| 107543 | 1398043 | 3959535 | 457.534 | 457.43 | -0.104 | 0.010816 |
| 107547 | 1397847 | 3959447 | 457.594 | 457.49 | -0.104 | 0.010816 |
| 106142 | 1420899 | 3964880 | 470.484 | 470.38 | -0.104 | 0.010816 |
| 106961 | 1420711 | 3956900 | 475.065 | 474.96 | -0.104 | 0.010816 |
| 100081 | 1358148 | 3961294 | 435.533 | 435.43 | -0.103 | 0.010609 |
| 101401 | 1346005 | 3961576 | 436.713 | 436.61 | -0.103 | 0.010609 |
| 100201 | 1358291 | 3966778 | 437.823 | 437.72 | -0.103 | 0.010609 |
| 104215 | 1372659 | 3947637 | 450.553 | 450.45 | -0.103 | 0.010609 |
| 107622 | 1396049 | 3956203 | 457.103 | 457    | -0.103 | 0.010609 |
| 106931 | 1420738 | 3958267 | 473.923 | 473.82 | -0.103 | 0.010609 |
| 103369 | 1379642 | 3974237 | 483.503 | 483.4  | -0.103 | 0.010609 |
| 104420 | 1373743 | 3951325 | 446.712 | 446.61 | -0.102 | 0.010404 |
| 104154 | 1372651 | 3947644 | 450.482 | 450.38 | -0.102 | 0.010404 |
| 105965 | 1420885 | 3953410 | 475.352 | 475.25 | -0.102 | 0.010404 |
| 105750 | 1423942 | 3942615 | 485.232 | 485.13 | -0.102 | 0.010404 |
| 100820 | 1340504 | 3953638 | 432.901 | 432.8  | -0.101 | 0.010201 |
| 103971 | 1373725 | 3950936 | 446.531 | 446.43 | -0.101 | 0.010201 |
| 104209 | 1372616 | 3947561 | 450.491 | 450.39 | -0.101 | 0.010201 |
| 107625 | 1396004 | 3956045 | 456.851 | 456.75 | -0.101 | 0.010201 |
| 100423 | 1349548 | 3968100 | 459.861 | 459.76 | -0.101 | 0.010201 |
| 103397 | 1379602 | 3972997 | 461.051 | 460.95 | -0.101 | 0.010201 |
| 106762 | 1421783 | 3970963 | 470.911 | 470.81 | -0.101 | 0.010201 |
| 106313 | 1421852 | 3973634 | 477.971 | 477.87 | -0.101 | 0.010201 |
| 105642 | 1428750 | 3939346 | 489.771 | 489.67 | -0.101 | 0.010201 |
| 101868 | 1356938 | 3974945 | 494.991 | 494.89 | -0.101 | 0.010201 |
| 100951 | 1335992 | 3950197 | 433.45  | 433.35 | -0.1   | 0.01     |
| 100196 | 1358286 | 3966559 | 440.62  | 440.52 | -0.1   | 0.01     |
| 103599 | 1375487 | 3967193 | 447.24  | 447.14 | -0.1   | 0.01     |
| 103467 | 1379466 | 3970806 | 450.48  | 450.38 | -0.1   | 0.01     |
| 107495 | 1400424 | 3960619 | 460.27  | 460.17 | -0.1   | 0.01     |
| 107684 | 1394971 | 3953034 | 463.74  | 463.64 | -0.1   | 0.01     |
| 106194 | 1421254 | 3967835 | 468.85  | 468.75 | -0.1   | 0.01     |
| 106767 | 1421780 | 3970712 | 471.54  | 471.44 | -0.1   | 0.01     |
| 106224 | 1421776 | 3969750 | 472.73  | 472.63 | -0.1   | 0.01     |
| 105650 | 1428458 | 3939599 | 489.32  | 489.22 | -0.1   | 0.01     |
| 105493 | 1429279 | 3933464 | 493.4   | 493.3  | -0.1   | 0.01     |
| 105515 | 1429513 | 3934165 | 493.44  | 493.34 | -0.1   | 0.01     |
| 105522 | 1429578 | 3934411 | 493.83  | 493.73 | -0.1   | 0.01     |
| 100720 | 1343376 | 3956978 | 433.069 | 432.97 | -0.099 | 0.009801 |
| 101766 | 1358388 | 3970889 | 438.469 | 438.37 | -0.099 | 0.009801 |
| 103817 | 1373876 | 3957288 | 446.199 | 446.1  | -0.099 | 0.009801 |
| 103960 | 1373732 | 3951250 | 446.819 | 446.72 | -0.099 | 0.009801 |
| 103538 | 1377331 | 3968996 | 447.479 | 447.38 | -0.099 | 0.009801 |
| 104158 | 1372616 | 3947581 | 450.279 | 450.18 | -0.099 | 0.009801 |
| 103442 | 1379601 | 3971758 | 451.269 | 451.17 | -0.099 | 0.009801 |
| 103611 | 1375050 | 3966018 | 456.979 | 456.88 | -0.099 | 0.009801 |
| 107645 | 1395699 | 3955012 | 458.619 | 458.52 | -0.099 | 0.009801 |
| 100429 | 1349412 | 3967862 | 459.299 | 459.2  | -0.099 | 0.009801 |
| 101863 | 1357093 | 3974672 | 492.469 | 492.37 | -0.099 | 0.009801 |

|        |         |         |         |        |        |          |
|--------|---------|---------|---------|--------|--------|----------|
| 100942 | 1336251 | 3950466 | 432.928 | 432.83 | -0.098 | 0.009604 |
| 101155 | 1336305 | 3950499 | 433.008 | 432.91 | -0.098 | 0.009604 |
| 103630 | 1374987 | 3965135 | 445.928 | 445.83 | -0.098 | 0.009604 |
| 103518 | 1377891 | 3969361 | 448.388 | 448.29 | -0.098 | 0.009604 |
| 100460 | 1348745 | 3966663 | 458.678 | 458.58 | -0.098 | 0.009604 |
| 106269 | 1421806 | 3971309 | 469.718 | 469.62 | -0.098 | 0.009604 |
| 101191 | 1337503 | 3951589 | 432.577 | 432.48 | -0.097 | 0.009409 |
| 100593 | 1346012 | 3961622 | 436.847 | 436.75 | -0.097 | 0.009409 |
| 103784 | 1373660 | 3959265 | 443.867 | 443.77 | -0.097 | 0.009409 |
| 103813 | 1373831 | 3958043 | 445.547 | 445.45 | -0.097 | 0.009409 |
| 103840 | 1373856 | 3956298 | 445.847 | 445.75 | -0.097 | 0.009409 |
| 104160 | 1372597 | 3947548 | 450.397 | 450.3  | -0.097 | 0.009409 |
| 107651 | 1395609 | 3954705 | 458.207 | 458.11 | -0.097 | 0.009409 |
| 100452 | 1348918 | 3966973 | 459.717 | 459.62 | -0.097 | 0.009409 |
| 106143 | 1420899 | 3964915 | 470.467 | 470.37 | -0.097 | 0.009409 |
| 106843 | 1420894 | 3965464 | 470.497 | 470.4  | -0.097 | 0.009409 |
| 100982 | 1335082 | 3949255 | 476.397 | 476.3  | -0.097 | 0.009409 |
| 105467 | 1429077 | 3932597 | 495.927 | 495.83 | -0.097 | 0.009409 |
| 100220 | 1358313 | 3967623 | 435.886 | 435.79 | -0.096 | 0.009216 |
| 101451 | 1347315 | 3964048 | 441.196 | 441.1  | -0.096 | 0.009216 |
| 107619 | 1396095 | 3956357 | 456.716 | 456.62 | -0.096 | 0.009216 |
| 100417 | 1349705 | 3968325 | 459.186 | 459.09 | -0.096 | 0.009216 |
| 100431 | 1349369 | 3967783 | 459.286 | 459.19 | -0.096 | 0.009216 |
| 106189 | 1421146 | 3967651 | 470.336 | 470.24 | -0.096 | 0.009216 |
| 105540 | 1429937 | 3935242 | 493.576 | 493.48 | -0.096 | 0.009216 |
| 103641 | 1374962 | 3964678 | 445.425 | 445.33 | -0.095 | 0.009025 |
| 100361 | 1352790 | 3969065 | 445.645 | 445.55 | -0.095 | 0.009025 |
| 103638 | 1374969 | 3964801 | 445.765 | 445.67 | -0.095 | 0.009025 |
| 103553 | 1376796 | 3968650 | 446.325 | 446.23 | -0.095 | 0.009025 |
| 100974 | 1335311 | 3949491 | 450.255 | 450.16 | -0.095 | 0.009025 |
| 101553 | 1349801 | 3968367 | 456.765 | 456.67 | -0.095 | 0.009025 |
| 100453 | 1348897 | 3966935 | 459.615 | 459.52 | -0.095 | 0.009025 |
| 106744 | 1421800 | 3971839 | 471.515 | 471.42 | -0.095 | 0.009025 |
| 106295 | 1421833 | 3972694 | 474.395 | 474.3  | -0.095 | 0.009025 |
| 105994 | 1420384 | 3954243 | 474.445 | 474.35 | -0.095 | 0.009025 |
| 100796 | 1341196 | 3954432 | 433.064 | 432.97 | -0.094 | 0.008836 |
| 100918 | 1336990 | 3951227 | 433.494 | 433.4  | -0.094 | 0.008836 |
| 100699 | 1343853 | 3957767 | 434.594 | 434.5  | -0.094 | 0.008836 |
| 101765 | 1358388 | 3970851 | 438.574 | 438.48 | -0.094 | 0.008836 |
| 101455 | 1347428 | 3964243 | 444.364 | 444.27 | -0.094 | 0.008836 |
| 103629 | 1374989 | 3965178 | 445.794 | 445.7  | -0.094 | 0.008836 |
| 103885 | 1373808 | 3954103 | 447.144 | 447.05 | -0.094 | 0.008836 |
| 103607 | 1375304 | 3966863 | 454.554 | 454.46 | -0.094 | 0.008836 |
| 103612 | 1375044 | 3965972 | 456.094 | 456    | -0.094 | 0.008836 |
| 107525 | 1398906 | 3959926 | 458.424 | 458.33 | -0.094 | 0.008836 |
| 105708 | 1425925 | 3941380 | 485.824 | 485.73 | -0.094 | 0.008836 |
| 105743 | 1424145 | 3942277 | 485.914 | 485.82 | -0.094 | 0.008836 |
| 105627 | 1429253 | 3938911 | 490.434 | 490.34 | -0.094 | 0.008836 |
| 101860 | 1357175 | 3974569 | 491.114 | 491.02 | -0.094 | 0.008836 |
| 105544 | 1429975 | 3935315 | 493.474 | 493.38 | -0.094 | 0.008836 |
| 101008 | 1334644 | 3948313 | 564.364 | 564.27 | -0.094 | 0.008836 |
| 100816 | 1340620 | 3953770 | 432.903 | 432.81 | -0.093 | 0.008649 |

|        |         |         |         |        |        |          |
|--------|---------|---------|---------|--------|--------|----------|
| 100622 | 1345414 | 3960567 | 436.833 | 436.74 | -0.093 | 0.008649 |
| 103827 | 1373870 | 3956836 | 445.213 | 445.12 | -0.093 | 0.008649 |
| 103955 | 1373734 | 3951390 | 446.683 | 446.59 | -0.093 | 0.008649 |
| 104464 | 1373773 | 3952508 | 447.173 | 447.08 | -0.093 | 0.008649 |
| 103680 | 1374662 | 3963227 | 448.683 | 448.59 | -0.093 | 0.008649 |
| 100373 | 1352254 | 3969078 | 449.773 | 449.68 | -0.093 | 0.008649 |
| 104172 | 1372491 | 3947375 | 450.423 | 450.33 | -0.093 | 0.008649 |
| 106792 | 1421271 | 3967900 | 468.053 | 467.96 | -0.093 | 0.008649 |
| 100996 | 1334775 | 3948789 | 525.153 | 525.06 | -0.093 | 0.008649 |
| 100716 | 1343477 | 3957126 | 432.832 | 432.74 | -0.092 | 0.008464 |
| 100161 | 1358230 | 3964406 | 436.872 | 436.78 | -0.092 | 0.008464 |
| 103856 | 1373838 | 3955664 | 446.063 | 445.97 | -0.092 | 0.008464 |
| 103664 | 1374881 | 3963768 | 446.712 | 446.62 | -0.092 | 0.008464 |
| 103921 | 1373765 | 3952641 | 447.602 | 447.51 | -0.092 | 0.008464 |
| 106106 | 1420789 | 3960163 | 474.942 | 474.85 | -0.092 | 0.008464 |
| 105744 | 1424094 | 3942348 | 485.792 | 485.7  | -0.092 | 0.008464 |
| 105527 | 1429648 | 3934641 | 493.202 | 493.11 | -0.092 | 0.008464 |
| 105550 | 1430056 | 3935468 | 493.352 | 493.26 | -0.092 | 0.008464 |
| 105554 | 1430144 | 3935637 | 493.862 | 493.77 | -0.092 | 0.008464 |
| 101236 | 1340387 | 3953485 | 432.891 | 432.8  | -0.091 | 0.008281 |
| 100037 | 1357273 | 3959802 | 436.231 | 436.14 | -0.091 | 0.008281 |
| 100595 | 1345969 | 3961546 | 436.721 | 436.63 | -0.091 | 0.008281 |
| 100534 | 1347167 | 3963835 | 440.641 | 440.55 | -0.091 | 0.008281 |
| 101818 | 1358354 | 3973160 | 449.801 | 449.71 | -0.091 | 0.008281 |
| 104166 | 1372544 | 3947456 | 450.541 | 450.45 | -0.091 | 0.008281 |
| 103474 | 1379324 | 3970522 | 451.221 | 451.13 | -0.091 | 0.008281 |
| 100449 | 1348981 | 3967086 | 460.061 | 459.97 | -0.091 | 0.008281 |
| 105860 | 1422765 | 3948114 | 478.391 | 478.3  | -0.091 | 0.008281 |
| 105749 | 1423961 | 3942575 | 485.231 | 485.14 | -0.091 | 0.008281 |
| 105561 | 1430312 | 3935980 | 494.471 | 494.38 | -0.091 | 0.008281 |
| 101103 | 1334751 | 3948652 | 535.821 | 535.73 | -0.091 | 0.008281 |
| 101169 | 1336718 | 3950930 | 432.73  | 432.64 | -0.09  | 0.0081   |
| 101456 | 1347451 | 3964281 | 445.3   | 445.21 | -0.09  | 0.0081   |
| 103679 | 1374682 | 3963262 | 448.65  | 448.56 | -0.09  | 0.0081   |
| 101833 | 1358044 | 3973805 | 462.81  | 462.72 | -0.09  | 0.0081   |
| 106190 | 1421162 | 3967681 | 470.241 | 470.15 | -0.09  | 0.0081   |
| 106133 | 1420889 | 3964489 | 470.45  | 470.36 | -0.09  | 0.0081   |
| 106055 | 1420741 | 3957510 | 474.82  | 474.73 | -0.09  | 0.0081   |
| 105975 | 1420598 | 3953760 | 475.55  | 475.46 | -0.09  | 0.0081   |
| 101159 | 1336427 | 3950624 | 432.739 | 432.65 | -0.089 | 0.007921 |
| 100697 | 1343894 | 3957841 | 434.869 | 434.78 | -0.089 | 0.007921 |
| 103646 | 1374951 | 3964474 | 444.879 | 444.79 | -0.089 | 0.007921 |
| 103743 | 1374021 | 3960522 | 445.489 | 445.4  | -0.089 | 0.007921 |
| 103976 | 1373719 | 3950800 | 447.439 | 447.35 | -0.089 | 0.007921 |
| 106932 | 1420737 | 3958230 | 474.109 | 474.02 | -0.089 | 0.007921 |
| 105931 | 1421521 | 3951724 | 476.339 | 476.25 | -0.089 | 0.007921 |
| 105446 | 1429148 | 3931683 | 496.059 | 495.97 | -0.089 | 0.007921 |
| 105413 | 1428987 | 3930775 | 496.859 | 496.77 | -0.089 | 0.007921 |
| 100040 | 1357347 | 3959839 | 436.678 | 436.59 | -0.088 | 0.007744 |
| 100058 | 1357969 | 3960255 | 436.708 | 436.62 | -0.088 | 0.007744 |
| 100664 | 1344562 | 3959036 | 436.788 | 436.7  | -0.088 | 0.007744 |
| 100656 | 1344733 | 3959341 | 437.148 | 437.06 | -0.088 | 0.007744 |

|        |         |         |         |        |        |          |
|--------|---------|---------|---------|--------|--------|----------|
| 103576 | 1376057 | 3967961 | 444.228 | 444.14 | -0.088 | 0.007744 |
| 103835 | 1373862 | 3956497 | 445.868 | 445.78 | -0.088 | 0.007744 |
| 107506 | 1399873 | 3960371 | 459.048 | 458.96 | -0.088 | 0.007744 |
| 100428 | 1349434 | 3967902 | 459.238 | 459.15 | -0.088 | 0.007744 |
| 106905 | 1420762 | 3959578 | 475.168 | 475.08 | -0.088 | 0.007744 |
| 5528   | 1388625 | 4005465 | 738.378 | 738.29 | -0.088 | 0.007744 |
| 100233 | 1358329 | 3968192 | 438.037 | 437.95 | -0.087 | 0.007569 |
| 100533 | 1347188 | 3963874 | 440.647 | 440.56 | -0.087 | 0.007569 |
| 101450 | 1347293 | 3964008 | 440.757 | 440.67 | -0.087 | 0.007569 |
| 107649 | 1395635 | 3954794 | 458.207 | 458.12 | -0.087 | 0.007569 |
| 106260 | 1421802 | 3970888 | 471.047 | 470.96 | -0.087 | 0.007569 |
| 106160 | 1420913 | 3965657 | 471.157 | 471.07 | -0.087 | 0.007569 |
| 107013 | 1420525 | 3954618 | 475.007 | 474.92 | -0.087 | 0.007569 |
| 105745 | 1424070 | 3942384 | 485.677 | 485.59 | -0.087 | 0.007569 |
| 105541 | 1429947 | 3935262 | 493.617 | 493.53 | -0.087 | 0.007569 |
| 101045 | 1333197 | 3947213 | 546.917 | 546.83 | -0.087 | 0.007569 |
| 101392 | 1345793 | 3961198 | 436.876 | 436.79 | -0.086 | 0.007396 |
| 101427 | 1346744 | 3962936 | 437.356 | 437.27 | -0.086 | 0.007396 |
| 103597 | 1375537 | 3967268 | 445.926 | 445.84 | -0.086 | 0.007396 |
| 103937 | 1373744 | 3951941 | 445.926 | 445.84 | -0.086 | 0.007396 |
| 101574 | 1351326 | 3969073 | 451.076 | 450.99 | -0.086 | 0.007396 |
| 101493 | 1348397 | 3965964 | 456.586 | 456.5  | -0.086 | 0.007396 |
| 103392 | 1379602 | 3973208 | 463.156 | 463.07 | -0.086 | 0.007396 |
| 106288 | 1421826 | 3972318 | 471.966 | 471.88 | -0.086 | 0.007396 |
| 106733 | 1421811 | 3972401 | 472.446 | 472.36 | -0.086 | 0.007396 |
| 100937 | 1336424 | 3950645 | 432.895 | 432.81 | -0.085 | 0.007225 |
| 101293 | 1343496 | 3957132 | 433.275 | 433.19 | -0.085 | 0.007225 |
| 103561 | 1376510 | 3968455 | 445.835 | 445.75 | -0.085 | 0.007225 |
| 100399 | 1351144 | 3969107 | 453.785 | 453.7  | -0.085 | 0.007225 |
| 103404 | 1379603 | 3972715 | 458.645 | 458.56 | -0.085 | 0.007225 |
| 107664 | 1395405 | 3954016 | 458.995 | 458.91 | -0.085 | 0.007225 |
| 105843 | 1423324 | 3947339 | 476.445 | 476.36 | -0.085 | 0.007225 |
| 101419 | 1346445 | 3962371 | 437.194 | 437.11 | -0.084 | 0.007056 |
| 101783 | 1358360 | 3971536 | 440.404 | 440.32 | -0.084 | 0.007056 |
| 100363 | 1352703 | 3969066 | 446.334 | 446.25 | -0.084 | 0.007056 |
| 103479 | 1379195 | 3970337 | 451.834 | 451.75 | -0.084 | 0.007056 |
| 100408 | 1350819 | 3969047 | 454.934 | 454.85 | -0.084 | 0.007056 |
| 106861 | 1420877 | 3964565 | 470.404 | 470.32 | -0.084 | 0.007056 |
| 106903 | 1420763 | 3959656 | 475.254 | 475.17 | -0.084 | 0.007056 |
| 105644 | 1428665 | 3939420 | 489.634 | 489.55 | -0.084 | 0.007056 |
| 103361 | 1379740 | 3974602 | 489.814 | 489.73 | -0.084 | 0.007056 |
| 100619 | 1345470 | 3960666 | 436.793 | 436.71 | -0.083 | 0.006889 |
| 100669 | 1344459 | 3958851 | 436.833 | 436.75 | -0.083 | 0.006889 |
| 104478 | 1373788 | 3952918 | 447.443 | 447.36 | -0.083 | 0.006889 |
| 101587 | 1351869 | 3969070 | 450.833 | 450.75 | -0.083 | 0.006889 |
| 107508 | 1399794 | 3960335 | 459.033 | 458.95 | -0.083 | 0.006889 |
| 106293 | 1421831 | 3972569 | 474.013 | 473.93 | -0.083 | 0.006889 |
| 5536   | 1388930 | 4005772 | 742.083 | 742    | -0.083 | 0.006889 |
| 100133 | 1358211 | 3963385 | 435.162 | 435.08 | -0.082 | 0.006724 |
| 100123 | 1358201 | 3963086 | 435.542 | 435.46 | -0.082 | 0.006724 |
| 100205 | 1358296 | 3966954 | 436.252 | 436.17 | -0.082 | 0.006724 |
| 101762 | 1358385 | 3970728 | 439.142 | 439.06 | -0.082 | 0.006724 |

|        |         |         |         |        |        |          |
|--------|---------|---------|---------|--------|--------|----------|
| 103845 | 1373850 | 3956099 | 445.832 | 445.75 | -0.082 | 0.006724 |
| 103972 | 1373724 | 3950907 | 446.612 | 446.53 | -0.082 | 0.006724 |
| 107603 | 1396315 | 3957105 | 456.722 | 456.64 | -0.082 | 0.006724 |
| 100420 | 1349624 | 3968216 | 459.582 | 459.5  | -0.082 | 0.006724 |
| 106266 | 1421804 | 3971138 | 470.112 | 470.03 | -0.082 | 0.006724 |
| 106236 | 1421789 | 3970192 | 472.272 | 472.19 | -0.082 | 0.006724 |
| 105956 | 1421111 | 3952990 | 475.522 | 475.44 | -0.082 | 0.006724 |
| 105494 | 1429286 | 3933490 | 493.312 | 493.23 | -0.082 | 0.006724 |
| 101021 | 1334341 | 3947880 | 570.922 | 570.84 | -0.082 | 0.006724 |
| 100036 | 1357259 | 3959794 | 436.191 | 436.11 | -0.081 | 0.006561 |
| 101424 | 1346671 | 3962794 | 436.941 | 436.86 | -0.081 | 0.006561 |
| 103950 | 1373735 | 3951529 | 446.291 | 446.21 | -0.081 | 0.006561 |
| 104479 | 1373790 | 3952960 | 447.361 | 447.28 | -0.081 | 0.006561 |
| 103520 | 1377853 | 3969335 | 448.191 | 448.11 | -0.081 | 0.006561 |
| 101504 | 1348683 | 3966474 | 458.071 | 457.99 | -0.081 | 0.006561 |
| 107459 | 1402100 | 3961274 | 460.691 | 460.61 | -0.081 | 0.006561 |
| 106268 | 1421805 | 3971267 | 469.831 | 469.75 | -0.081 | 0.006561 |
| 105974 | 1420625 | 3953733 | 475.521 | 475.44 | -0.081 | 0.006561 |
| 101003 | 1334699 | 3948509 | 548.651 | 548.57 | -0.081 | 0.006561 |
| 100032 | 1357177 | 3959753 | 436.08  | 436    | -0.08  | 0.0064   |
| 100581 | 1346275 | 3962093 | 436.91  | 436.83 | -0.08  | 0.0064   |
| 100655 | 1344755 | 3959381 | 437.05  | 436.97 | -0.08  | 0.0064   |
| 103761 | 1373729 | 3960061 | 444.15  | 444.07 | -0.08  | 0.0064   |
| 103946 | 1373736 | 3951648 | 446.62  | 446.54 | -0.08  | 0.0064   |
| 104499 | 1373819 | 3954003 | 447.17  | 447.09 | -0.08  | 0.0064   |
| 103537 | 1377363 | 3969017 | 447.54  | 447.46 | -0.08  | 0.0064   |
| 100394 | 1351357 | 3969119 | 453.13  | 453.05 | -0.08  | 0.0064   |
| 100444 | 1349089 | 3967278 | 460.42  | 460.34 | -0.08  | 0.0064   |
| 101011 | 1334603 | 3948198 | 570.13  | 570.05 | -0.08  | 0.0064   |
| 101294 | 1343520 | 3957170 | 433.249 | 433.17 | -0.079 | 0.006241 |
| 101343 | 1344698 | 3959249 | 437.189 | 437.11 | -0.079 | 0.006241 |
| 103826 | 1373871 | 3956880 | 445.409 | 445.33 | -0.079 | 0.006241 |
| 103857 | 1373837 | 3955623 | 446.079 | 446    | -0.079 | 0.006241 |
| 101602 | 1352538 | 3969055 | 447.759 | 447.68 | -0.079 | 0.006241 |
| 103497 | 1378553 | 3969804 | 451.869 | 451.79 | -0.079 | 0.006241 |
| 103483 | 1379069 | 3970196 | 452.079 | 452    | -0.079 | 0.006241 |
| 100400 | 1351102 | 3969103 | 453.99  | 453.91 | -0.079 | 0.006241 |
| 101487 | 1348253 | 3965705 | 455.889 | 455.81 | -0.079 | 0.006241 |
| 107660 | 1395466 | 3954220 | 458.269 | 458.19 | -0.079 | 0.006241 |
| 107654 | 1395555 | 3954524 | 458.289 | 458.21 | -0.079 | 0.006241 |
| 100454 | 1348875 | 3966897 | 459.449 | 459.37 | -0.079 | 0.006241 |
| 106868 | 1420867 | 3964195 | 471.279 | 471.2  | -0.079 | 0.006241 |
| 106235 | 1421788 | 3970167 | 472.169 | 472.09 | -0.079 | 0.006241 |
| 106172 | 1420928 | 3966620 | 472.339 | 472.26 | -0.079 | 0.006241 |
| 106298 | 1421836 | 3972819 | 474.719 | 474.64 | -0.079 | 0.006241 |
| 5541   | 1389119 | 4005964 | 744.429 | 744.35 | -0.079 | 0.006241 |
| 100227 | 1358320 | 3967932 | 437.718 | 437.64 | -0.078 | 0.006084 |
| 103851 | 1373844 | 3955864 | 445.868 | 445.79 | -0.078 | 0.006084 |
| 103546 | 1377052 | 3968816 | 447.418 | 447.34 | -0.078 | 0.006084 |
| 103475 | 1379301 | 3970484 | 451.408 | 451.33 | -0.078 | 0.006084 |
| 103476 | 1379276 | 3970447 | 451.568 | 451.49 | -0.078 | 0.006084 |
| 107626 | 1395992 | 3956005 | 456.738 | 456.66 | -0.078 | 0.006084 |

|        |         |         |         |        |        |          |
|--------|---------|---------|---------|--------|--------|----------|
| 100442 | 1349133 | 3967356 | 460.508 | 460.43 | -0.078 | 0.006084 |
| 106256 | 1421800 | 3970748 | 471.328 | 471.25 | -0.078 | 0.006084 |
| 106950 | 1420722 | 3957423 | 474.948 | 474.87 | -0.078 | 0.006084 |
| 105969 | 1420774 | 3953562 | 475.298 | 475.22 | -0.078 | 0.006084 |
| 100104 | 1358173 | 3962284 | 436.647 | 436.57 | -0.077 | 0.005929 |
| 100173 | 1358260 | 3965587 | 437.227 | 437.15 | -0.077 | 0.005929 |
| 101778 | 1358366 | 3971335 | 439.577 | 439.5  | -0.077 | 0.005929 |
| 103809 | 1373805 | 3958214 | 445.317 | 445.24 | -0.077 | 0.005929 |
| 104415 | 1373740 | 3951216 | 446.668 | 446.59 | -0.077 | 0.005929 |
| 104419 | 1373742 | 3951303 | 446.767 | 446.69 | -0.077 | 0.005929 |
| 103697 | 1374282 | 3962553 | 450.477 | 450.4  | -0.077 | 0.005929 |
| 103388 | 1379604 | 3973380 | 465.657 | 465.58 | -0.077 | 0.005929 |
| 106816 | 1420930 | 3967005 | 471.947 | 471.87 | -0.077 | 0.005929 |
| 106924 | 1420743 | 3958607 | 472.967 | 472.89 | -0.077 | 0.005929 |
| 106051 | 1420737 | 3957305 | 474.707 | 474.63 | -0.077 | 0.005929 |
| 107008 | 1420570 | 3954767 | 474.857 | 474.78 | -0.077 | 0.005929 |
| 101095 | 1334663 | 3948329 | 563.637 | 563.56 | -0.077 | 0.005929 |
| 100120 | 1358197 | 3962971 | 435.716 | 435.64 | -0.076 | 0.005776 |
| 100629 | 1345289 | 3960343 | 436.816 | 436.74 | -0.076 | 0.005776 |
| 100668 | 1344479 | 3958888 | 436.876 | 436.8  | -0.076 | 0.005776 |
| 100539 | 1347067 | 3963637 | 440.156 | 440.08 | -0.076 | 0.005776 |
| 104441 | 1373752 | 3951768 | 446.456 | 446.38 | -0.076 | 0.005776 |
| 103963 | 1373730 | 3951166 | 446.506 | 446.43 | -0.076 | 0.005776 |
| 103616 | 1375023 | 3965785 | 452.236 | 452.16 | -0.076 | 0.005776 |
| 101525 | 1349215 | 3967426 | 460.186 | 460.11 | -0.076 | 0.005776 |
| 105656 | 1428214 | 3939812 | 488.676 | 488.6  | -0.076 | 0.005776 |
| 105534 | 1429805 | 3934990 | 494.246 | 494.17 | -0.076 | 0.005776 |
| 5531   | 1388740 | 4005581 | 739.446 | 739.37 | -0.076 | 0.005776 |
| 100871 | 1338754 | 3952181 | 433.215 | 433.14 | -0.075 | 0.005625 |
| 104459 | 1373766 | 3952268 | 446.055 | 445.98 | -0.075 | 0.005625 |
| 104157 | 1372625 | 3947598 | 450.305 | 450.23 | -0.075 | 0.005625 |
| 103495 | 1378627 | 3969852 | 451.955 | 451.88 | -0.075 | 0.005625 |
| 105614 | 1429642 | 3938573 | 490.045 | 489.97 | -0.075 | 0.005625 |
| 105547 | 1430003 | 3935367 | 493.495 | 493.42 | -0.075 | 0.005625 |
| 105440 | 1429143 | 3931388 | 495.915 | 495.84 | -0.075 | 0.005625 |
| 101025 | 1334188 | 3947784 | 564.965 | 564.89 | -0.075 | 0.005625 |
| 100053 | 1357776 | 3960065 | 436.644 | 436.57 | -0.074 | 0.005476 |
| 100666 | 1344521 | 3958962 | 436.824 | 436.75 | -0.074 | 0.005476 |
| 101789 | 1358369 | 3971815 | 441.494 | 441.42 | -0.074 | 0.005476 |
| 103875 | 1373821 | 3954603 | 446.484 | 446.41 | -0.074 | 0.005476 |
| 104417 | 1373741 | 3951259 | 446.734 | 446.66 | -0.074 | 0.005476 |
| 103457 | 1379580 | 3971232 | 449.384 | 449.31 | -0.074 | 0.005476 |
| 107457 | 1402186 | 3961305 | 461.084 | 461.01 | -0.074 | 0.005476 |
| 105652 | 1428366 | 3939679 | 489.024 | 488.95 | -0.074 | 0.005476 |
| 100930 | 1336623 | 3950851 | 432.713 | 432.64 | -0.073 | 0.005329 |
| 100744 | 1342699 | 3956150 | 433.023 | 432.95 | -0.073 | 0.005329 |
| 101375 | 1345475 | 3960634 | 436.953 | 436.88 | -0.073 | 0.005329 |
| 100657 | 1344711 | 3959302 | 437.233 | 437.16 | -0.073 | 0.005329 |
| 103699 | 1374240 | 3962467 | 450.563 | 450.49 | -0.073 | 0.005329 |
| 104384 | 1373719 | 3950548 | 454.013 | 453.94 | -0.073 | 0.005329 |
| 100448 | 1349002 | 3967123 | 460.113 | 460.04 | -0.073 | 0.005329 |
| 103391 | 1379602 | 3973251 | 463.703 | 463.63 | -0.073 | 0.005329 |

|        |         |         |         |        |        |          |
|--------|---------|---------|---------|--------|--------|----------|
| 106280 | 1421817 | 3971904 | 471.483 | 471.41 | -0.073 | 0.005329 |
| 107005 | 1420599 | 3954868 | 475.163 | 475.09 | -0.073 | 0.005329 |
| 105747 | 1424024 | 3942460 | 485.383 | 485.31 | -0.073 | 0.005329 |
| 105542 | 1429960 | 3935287 | 493.534 | 493.46 | -0.073 | 0.005329 |
| 100793 | 1341280 | 3954527 | 433.012 | 432.94 | -0.072 | 0.005184 |
| 100170 | 1358241 | 3964823 | 437.462 | 437.39 | -0.072 | 0.005184 |
| 103748 | 1374009 | 3960347 | 444.972 | 444.9  | -0.072 | 0.005184 |
| 103714 | 1374053 | 3961713 | 448.472 | 448.4  | -0.072 | 0.005184 |
| 100470 | 1348534 | 3966285 | 457.592 | 457.52 | -0.072 | 0.005184 |
| 107595 | 1396426 | 3957504 | 458.262 | 458.19 | -0.072 | 0.005184 |
| 103385 | 1379604 | 3973512 | 467.422 | 467.35 | -0.072 | 0.005184 |
| 106226 | 1421780 | 3969929 | 472.552 | 472.48 | -0.072 | 0.005184 |
| 106885 | 1420848 | 3963333 | 473.852 | 473.78 | -0.072 | 0.005184 |
| 105706 | 1426062 | 3941339 | 486.392 | 486.32 | -0.072 | 0.005184 |
| 101104 | 1334761 | 3948691 | 532.482 | 532.41 | -0.072 | 0.005184 |
| 101040 | 1333555 | 3947418 | 542.192 | 542.12 | -0.072 | 0.005184 |
| 103734 | 1374030 | 3960865 | 445.741 | 445.67 | -0.071 | 0.005041 |
| 101503 | 1348663 | 3966437 | 457.971 | 457.9  | -0.071 | 0.005041 |
| 103384 | 1379604 | 3973556 | 468.141 | 468.07 | -0.071 | 0.005041 |
| 106871 | 1420863 | 3964025 | 471.951 | 471.88 | -0.071 | 0.005041 |
| 105727 | 1424855 | 3941717 | 486.231 | 486.16 | -0.071 | 0.005041 |
| 101859 | 1357236 | 3974506 | 489.921 | 489.85 | -0.071 | 0.005041 |
| 101077 | 1334040 | 3947685 | 559.441 | 559.37 | -0.071 | 0.005041 |
| 101091 | 1334528 | 3948050 | 573.711 | 573.64 | -0.071 | 0.005041 |
| 101178 | 1336993 | 3951210 | 433.08  | 433.01 | -0.07  | 0.0049   |
| 100919 | 1336958 | 3951195 | 433.43  | 433.36 | -0.07  | 0.0049   |
| 101396 | 1345886 | 3961367 | 436.96  | 436.89 | -0.07  | 0.0049   |
| 103626 | 1374996 | 3965308 | 445.72  | 445.65 | -0.07  | 0.0049   |
| 103700 | 1374220 | 3962422 | 450.36  | 450.29 | -0.07  | 0.0049   |
| 103472 | 1379369 | 3970599 | 450.99  | 450.92 | -0.07  | 0.0049   |
| 101568 | 1351086 | 3969053 | 452     | 451.93 | -0.07  | 0.0049   |
| 100976 | 1335252 | 3949430 | 455.97  | 455.9  | -0.07  | 0.0049   |
| 100485 | 1348223 | 3965728 | 456.25  | 456.18 | -0.07  | 0.0049   |
| 100415 | 1349762 | 3968392 | 458.82  | 458.75 | -0.07  | 0.0049   |
| 106757 | 1421788 | 3971194 | 469.95  | 469.88 | -0.07  | 0.0049   |
| 106297 | 1421835 | 3972777 | 474.44  | 474.37 | -0.07  | 0.0049   |
| 106044 | 1420731 | 3956992 | 474.81  | 474.74 | -0.07  | 0.0049   |
| 101117 | 1335049 | 3949201 | 481.45  | 481.38 | -0.07  | 0.0049   |
| 105719 | 1425315 | 3941564 | 485.54  | 485.47 | -0.07  | 0.0049   |
| 105491 | 1429258 | 3933391 | 493.68  | 493.61 | -0.07  | 0.0049   |
| 105448 | 1429151 | 3931758 | 495.84  | 495.77 | -0.07  | 0.0049   |
| 100746 | 1342640 | 3956082 | 433.069 | 433    | -0.069 | 0.004761 |
| 100150 | 1358219 | 3963971 | 435.059 | 434.99 | -0.069 | 0.004761 |
| 101415 | 1346342 | 3962179 | 436.889 | 436.82 | -0.069 | 0.004761 |
| 100560 | 1346685 | 3962883 | 437.079 | 437.01 | -0.069 | 0.004761 |
| 100966 | 1335555 | 3949744 | 437.299 | 437.23 | -0.069 | 0.004761 |
| 100543 | 1346989 | 3963472 | 439.679 | 439.61 | -0.069 | 0.004761 |
| 104171 | 1372500 | 3947387 | 450.429 | 450.36 | -0.069 | 0.004761 |
| 104164 | 1372561 | 3947485 | 450.449 | 450.38 | -0.069 | 0.004761 |
| 104153 | 1372660 | 3947660 | 450.539 | 450.47 | -0.069 | 0.004761 |
| 107616 | 1396141 | 3956513 | 456.229 | 456.16 | -0.069 | 0.004761 |
| 107473 | 1401404 | 3961009 | 460.219 | 460.15 | -0.069 | 0.004761 |

|        |         |         |         |        |        |          |
|--------|---------|---------|---------|--------|--------|----------|
| 106153 | 1420908 | 3965370 | 470.449 | 470.38 | -0.069 | 0.004761 |
| 106241 | 1421800 | 3970409 | 471.919 | 471.85 | -0.069 | 0.004761 |
| 105946 | 1421287 | 3952464 | 474.729 | 474.66 | -0.069 | 0.004761 |
| 106951 | 1420720 | 3957349 | 474.849 | 474.78 | -0.069 | 0.004761 |
| 105970 | 1420751 | 3953591 | 475.339 | 475.27 | -0.069 | 0.004761 |
| 101844 | 1357715 | 3974111 | 476.659 | 476.59 | -0.069 | 0.004761 |
| 105526 | 1429634 | 3934601 | 493.429 | 493.36 | -0.069 | 0.004761 |
| 105514 | 1429516 | 3934145 | 493.609 | 493.54 | -0.069 | 0.004761 |
| 101009 | 1334632 | 3948274 | 566.729 | 566.66 | -0.069 | 0.004761 |
| 100922 | 1336863 | 3951100 | 433.368 | 433.3  | -0.068 | 0.004624 |
| 100088 | 1358156 | 3961598 | 434.988 | 434.92 | -0.068 | 0.004624 |
| 100596 | 1345947 | 3961509 | 436.828 | 436.76 | -0.068 | 0.004624 |
| 101753 | 1358374 | 3970348 | 440.108 | 440.04 | -0.068 | 0.004624 |
| 103596 | 1375563 | 3967304 | 445.348 | 445.28 | -0.068 | 0.004624 |
| 103975 | 1373720 | 3950826 | 447.058 | 446.99 | -0.068 | 0.004624 |
| 100378 | 1352028 | 3969087 | 450.548 | 450.48 | -0.068 | 0.004624 |
| 103494 | 1378665 | 3969877 | 452.058 | 451.99 | -0.068 | 0.004624 |
| 107540 | 1398195 | 3959606 | 457.578 | 457.51 | -0.068 | 0.004624 |
| 107548 | 1397808 | 3959429 | 457.608 | 457.54 | -0.068 | 0.004624 |
| 107646 | 1395686 | 3954969 | 458.438 | 458.37 | -0.068 | 0.004624 |
| 100421 | 1349598 | 3968178 | 459.558 | 459.49 | -0.068 | 0.004624 |
| 106797 | 1421173 | 3967736 | 470.458 | 470.39 | -0.068 | 0.004624 |
| 106774 | 1421773 | 3970408 | 472.128 | 472.06 | -0.068 | 0.004624 |
| 101056 | 1333318 | 3947265 | 542.418 | 542.35 | -0.068 | 0.004624 |
| 100589 | 1346098 | 3961777 | 436.547 | 436.48 | -0.067 | 0.004489 |
| 101334 | 1344506 | 3958906 | 436.807 | 436.74 | -0.067 | 0.004489 |
| 100575 | 1346394 | 3962309 | 437.058 | 436.99 | -0.067 | 0.004489 |
| 100554 | 1346766 | 3963039 | 437.867 | 437.8  | -0.067 | 0.004489 |
| 101786 | 1358364 | 3971672 | 440.927 | 440.86 | -0.067 | 0.004489 |
| 103579 | 1375978 | 3967856 | 443.887 | 443.82 | -0.067 | 0.004489 |
| 103850 | 1373845 | 3955902 | 445.877 | 445.81 | -0.067 | 0.004489 |
| 103558 | 1376615 | 3968532 | 445.988 | 445.92 | -0.067 | 0.004489 |
| 104421 | 1373744 | 3951346 | 446.657 | 446.59 | -0.067 | 0.004489 |
| 101599 | 1352403 | 3969060 | 448.707 | 448.64 | -0.067 | 0.004489 |
| 101560 | 1350792 | 3968992 | 452.807 | 452.74 | -0.067 | 0.004489 |
| 104373 | 1373707 | 3950332 | 453.547 | 453.48 | -0.067 | 0.004489 |
| 103390 | 1379603 | 3973294 | 464.348 | 464.28 | -0.067 | 0.004489 |
| 106177 | 1420934 | 3966835 | 471.777 | 471.71 | -0.067 | 0.004489 |
| 105552 | 1430107 | 3935565 | 493.657 | 493.59 | -0.067 | 0.004489 |
| 5538   | 1389005 | 4005848 | 743.057 | 742.99 | -0.067 | 0.004489 |
| 101239 | 1340469 | 3953577 | 432.806 | 432.74 | -0.066 | 0.004356 |
| 100713 | 1343550 | 3957240 | 432.966 | 432.9  | -0.066 | 0.004356 |
| 101352 | 1344922 | 3959651 | 436.936 | 436.87 | -0.066 | 0.004356 |
| 101801 | 1358384 | 3972345 | 443.606 | 443.54 | -0.066 | 0.004356 |
| 103735 | 1374029 | 3960825 | 445.726 | 445.66 | -0.066 | 0.004356 |
| 103713 | 1374055 | 3961758 | 448.796 | 448.73 | -0.066 | 0.004356 |
| 104199 | 1372536 | 3947422 | 450.656 | 450.59 | -0.066 | 0.004356 |
| 100402 | 1351021 | 3969090 | 454.346 | 454.28 | -0.066 | 0.004356 |
| 101556 | 1349886 | 3968460 | 456.356 | 456.29 | -0.066 | 0.004356 |
| 101499 | 1348561 | 3966256 | 457.516 | 457.45 | -0.066 | 0.004356 |
| 106844 | 1420894 | 3965423 | 470.356 | 470.29 | -0.066 | 0.004356 |
| 106253 | 1421804 | 3970656 | 471.646 | 471.58 | -0.066 | 0.004356 |



|        |         |         |         |        |        |          |
|--------|---------|---------|---------|--------|--------|----------|
| 106330 | 1421871 | 3974549 | 482.056 | 481.99 | -0.066 | 0.004356 |
| 105681 | 1427292 | 3940605 | 487.716 | 487.65 | -0.066 | 0.004356 |
| 100214 | 1358307 | 3967358 | 435.315 | 435.25 | -0.065 | 0.004225 |
| 101399 | 1345945 | 3961470 | 436.885 | 436.82 | -0.065 | 0.004225 |
| 100649 | 1344890 | 3959621 | 436.965 | 436.9  | -0.065 | 0.004225 |
| 103844 | 1373851 | 3956139 | 445.805 | 445.74 | -0.065 | 0.004225 |
| 103798 | 1373741 | 3958696 | 445.815 | 445.75 | -0.065 | 0.004225 |
| 103913 | 1373776 | 3952936 | 447.425 | 447.36 | -0.065 | 0.004225 |
| 103675 | 1374755 | 3963403 | 447.955 | 447.89 | -0.065 | 0.004225 |
| 101813 | 1358388 | 3972888 | 447.985 | 447.92 | -0.065 | 0.004225 |
| 101814 | 1358385 | 3972933 | 448.385 | 448.32 | -0.065 | 0.004225 |
| 101583 | 1351697 | 3969070 | 450.935 | 450.87 | -0.065 | 0.004225 |
| 103485 | 1379000 | 3970128 | 452.255 | 452.19 | -0.065 | 0.004225 |
| 107608 | 1396250 | 3956883 | 456.415 | 456.35 | -0.065 | 0.004225 |
| 107643 | 1395736 | 3955138 | 458.795 | 458.73 | -0.065 | 0.004225 |
| 101523 | 1349171 | 3967349 | 460.425 | 460.36 | -0.065 | 0.004225 |
| 106058 | 1420743 | 3957682 | 474.675 | 474.61 | -0.065 | 0.004225 |
| 106942 | 1420729 | 3957782 | 474.775 | 474.71 | -0.065 | 0.004225 |
| 101042 | 1333482 | 3947374 | 540.735 | 540.67 | -0.065 | 0.004225 |
| 101152 | 1336210 | 3950404 | 432.964 | 432.9  | -0.064 | 0.004096 |
| 101405 | 1346107 | 3961758 | 436.524 | 436.46 | -0.064 | 0.004096 |
| 103484 | 1379035 | 3970162 | 452.204 | 452.14 | -0.064 | 0.004096 |
| 107524 | 1398988 | 3959964 | 458.394 | 458.33 | -0.064 | 0.004096 |
| 107593 | 1396448 | 3957588 | 458.574 | 458.51 | -0.064 | 0.004096 |
| 100962 | 1335679 | 3949871 | 435.513 | 435.45 | -0.063 | 0.003969 |
| 101393 | 1345811 | 3961231 | 436.843 | 436.78 | -0.063 | 0.003969 |
| 101796 | 1358378 | 3972127 | 442.703 | 442.64 | -0.063 | 0.003969 |
| 103750 | 1373994 | 3960281 | 444.553 | 444.49 | -0.063 | 0.003969 |
| 104454 | 1373761 | 3952138 | 446.113 | 446.05 | -0.063 | 0.003969 |
| 103517 | 1377912 | 3969375 | 448.433 | 448.37 | -0.063 | 0.003969 |
| 103696 | 1374304 | 3962595 | 450.363 | 450.3  | -0.063 | 0.003969 |
| 104205 | 1372588 | 3947512 | 450.573 | 450.51 | -0.063 | 0.003969 |
| 103471 | 1379390 | 3970639 | 450.913 | 450.85 | -0.063 | 0.003969 |
| 101564 | 1350935 | 3969027 | 452.283 | 452.22 | -0.063 | 0.003969 |
| 100403 | 1350983 | 3969083 | 454.443 | 454.38 | -0.063 | 0.003969 |
| 100405 | 1350911 | 3969069 | 454.633 | 454.57 | -0.063 | 0.003969 |
| 106138 | 1420895 | 3964701 | 470.383 | 470.32 | -0.063 | 0.003969 |
| 103374 | 1379612 | 3974011 | 478.493 | 478.43 | -0.063 | 0.003969 |
| 105704 | 1426153 | 3941309 | 487.043 | 486.98 | -0.063 | 0.003969 |
| 105528 | 1429663 | 3934680 | 493.123 | 493.06 | -0.063 | 0.003969 |
| 5532   | 1388779 | 4005620 | 739.993 | 739.93 | -0.063 | 0.003969 |
| 100921 | 1336894 | 3951132 | 433.412 | 433.35 | -0.062 | 0.003844 |
| 100122 | 1358200 | 3963049 | 435.622 | 435.56 | -0.062 | 0.003844 |
| 100605 | 1345754 | 3961163 | 436.812 | 436.75 | -0.062 | 0.003844 |
| 100786 | 1341474 | 3954748 | 432.801 | 432.74 | -0.061 | 0.003721 |
| 101249 | 1341211 | 3954427 | 433.051 | 432.99 | -0.061 | 0.003721 |
| 104440 | 1373751 | 3951742 | 446.501 | 446.44 | -0.061 | 0.003721 |
| 103503 | 1378344 | 3969666 | 451.341 | 451.28 | -0.061 | 0.003721 |
| 103481 | 1379134 | 3970265 | 451.971 | 451.91 | -0.061 | 0.003721 |
| 101821 | 1358306 | 3973335 | 452.291 | 452.23 | -0.061 | 0.003721 |
| 103436 | 1379602 | 3971874 | 452.351 | 452.29 | -0.061 | 0.003721 |
| 101827 | 1358196 | 3973584 | 456.001 | 455.94 | -0.061 | 0.003721 |

|        |         |         |         |        |        |          |
|--------|---------|---------|---------|--------|--------|----------|
| 100479 | 1348346 | 3965951 | 456.561 | 456.5  | -0.061 | 0.003721 |
| 100477 | 1348388 | 3966024 | 456.761 | 456.7  | -0.061 | 0.003721 |
| 107640 | 1395785 | 3955307 | 458.181 | 458.12 | -0.061 | 0.003721 |
| 105668 | 1427758 | 3940208 | 488.161 | 488.1  | -0.061 | 0.003721 |
| 105639 | 1428860 | 3939250 | 489.961 | 489.9  | -0.061 | 0.003721 |
| 5548   | 1389381 | 4006229 | 748.271 | 748.21 | -0.061 | 0.003721 |
| 100916 | 1337056 | 3951287 | 433.54  | 433.48 | -0.06  | 0.0036   |
| 100703 | 1343768 | 3957617 | 434.091 | 434.03 | -0.06  | 0.0036   |
| 103969 | 1373727 | 3950995 | 446.37  | 446.31 | -0.06  | 0.0036   |
| 100379 | 1351986 | 3969088 | 450.64  | 450.58 | -0.06  | 0.0036   |
| 101591 | 1352044 | 3969072 | 450.66  | 450.6  | -0.06  | 0.0036   |
| 103428 | 1379602 | 3971970 | 453     | 452.94 | -0.06  | 0.0036   |
| 100401 | 1351061 | 3969097 | 454.17  | 454.11 | -0.06  | 0.0036   |
| 101485 | 1348192 | 3965594 | 455.57  | 455.51 | -0.06  | 0.0036   |
| 107602 | 1396326 | 3957144 | 456.92  | 456.86 | -0.06  | 0.0036   |
| 100472 | 1348492 | 3966210 | 457.41  | 457.35 | -0.06  | 0.0036   |
| 101541 | 1349515 | 3967959 | 459.2   | 459.14 | -0.06  | 0.0036   |
| 106270 | 1421807 | 3971352 | 469.82  | 469.76 | -0.06  | 0.0036   |
| 106803 | 1421070 | 3967527 | 470.93  | 470.87 | -0.06  | 0.0036   |
| 106001 | 1420608 | 3954836 | 475.63  | 475.57 | -0.06  | 0.0036   |
| 101105 | 1334782 | 3948768 | 526.21  | 526.15 | -0.06  | 0.0036   |
| 100824 | 1340390 | 3953507 | 432.839 | 432.78 | -0.059 | 0.003481 |
| 101149 | 1336084 | 3950274 | 433.079 | 433.02 | -0.059 | 0.003481 |
| 100948 | 1336078 | 3950287 | 433.119 | 433.06 | -0.059 | 0.003481 |
| 101442 | 1347080 | 3963612 | 439.979 | 439.92 | -0.059 | 0.003481 |
| 103636 | 1374973 | 3964883 | 445.989 | 445.93 | -0.059 | 0.003481 |
| 103466 | 1379483 | 3970850 | 450.339 | 450.28 | -0.059 | 0.003481 |
| 101566 | 1351009 | 3969041 | 452.149 | 452.09 | -0.059 | 0.003481 |
| 101478 | 1348021 | 3965289 | 454.559 | 454.5  | -0.059 | 0.003481 |
| 100978 | 1335194 | 3949370 | 462.529 | 462.47 | -0.059 | 0.003481 |
| 101851 | 1357499 | 3974288 | 483.449 | 483.39 | -0.059 | 0.003481 |
| 105714 | 1425600 | 3941480 | 485.549 | 485.49 | -0.059 | 0.003481 |
| 105513 | 1429518 | 3934126 | 493.739 | 493.68 | -0.059 | 0.003481 |
| 101305 | 1343901 | 3957829 | 434.908 | 434.85 | -0.058 | 0.003364 |
| 101739 | 1358362 | 3969455 | 435.888 | 435.83 | -0.058 | 0.003364 |
| 103962 | 1373731 | 3951194 | 446.528 | 446.47 | -0.058 | 0.003364 |
| 104414 | 1373739 | 3951195 | 446.608 | 446.55 | -0.058 | 0.003364 |
| 101820 | 1358332 | 3973249 | 450.968 | 450.91 | -0.058 | 0.003364 |
| 106132 | 1420888 | 3964418 | 470.589 | 470.53 | -0.058 | 0.003364 |
| 106919 | 1420749 | 3958836 | 472.818 | 472.76 | -0.058 | 0.003364 |
| 106904 | 1420762 | 3959617 | 475.368 | 475.31 | -0.058 | 0.003364 |
| 105870 | 1422515 | 3948601 | 478.468 | 478.41 | -0.058 | 0.003364 |
| 105678 | 1427419 | 3940500 | 487.658 | 487.6  | -0.058 | 0.003364 |
| 100941 | 1336280 | 3950496 | 432.937 | 432.88 | -0.057 | 0.003249 |
| 100152 | 1358221 | 3964044 | 435.087 | 435.03 | -0.057 | 0.003249 |
| 101428 | 1346762 | 3962970 | 437.557 | 437.5  | -0.057 | 0.003249 |
| 100548 | 1346889 | 3963266 | 438.877 | 438.82 | -0.057 | 0.003249 |
| 101131 | 1335481 | 3949649 | 439.257 | 439.2  | -0.057 | 0.003249 |
| 101782 | 1358360 | 3971494 | 440.317 | 440.26 | -0.057 | 0.003249 |
| 101130 | 1335449 | 3949617 | 440.947 | 440.89 | -0.057 | 0.003249 |
| 100430 | 1349390 | 3967823 | 459.227 | 459.17 | -0.057 | 0.003249 |
| 106794 | 1421231 | 3967834 | 469.207 | 469.15 | -0.057 | 0.003249 |

|        |         |         |         |        |        |          |
|--------|---------|---------|---------|--------|--------|----------|
| 106245 | 1421808 | 3970481 | 471.967 | 471.91 | -0.057 | 0.003249 |
| 106318 | 1421857 | 3973891 | 478.637 | 478.58 | -0.057 | 0.003249 |
| 105748 | 1423981 | 3942537 | 485.217 | 485.16 | -0.057 | 0.003249 |
| 105701 | 1426328 | 3941244 | 487.567 | 487.51 | -0.057 | 0.003249 |
| 105649 | 1428489 | 3939573 | 489.357 | 489.3  | -0.057 | 0.003249 |
| 103362 | 1379724 | 3974555 | 489.357 | 489.3  | -0.057 | 0.003249 |
| 105637 | 1428914 | 3939204 | 489.967 | 489.91 | -0.057 | 0.003249 |
| 101143 | 1335892 | 3950074 | 433.956 | 433.9  | -0.056 | 0.003136 |
| 100129 | 1358207 | 3963281 | 435.276 | 435.22 | -0.056 | 0.003136 |
| 100638 | 1345117 | 3960034 | 436.816 | 436.76 | -0.056 | 0.003136 |
| 100583 | 1346231 | 3962015 | 436.866 | 436.81 | -0.056 | 0.003136 |
| 100970 | 1335433 | 3949617 | 441.546 | 441.49 | -0.056 | 0.003136 |
| 101803 | 1358386 | 3972435 | 444.066 | 444.01 | -0.056 | 0.003136 |
| 103656 | 1374930 | 3964090 | 445.696 | 445.64 | -0.056 | 0.003136 |
| 103855 | 1373839 | 3955704 | 446.086 | 446.03 | -0.056 | 0.003136 |
| 104455 | 1373762 | 3952165 | 446.116 | 446.06 | -0.056 | 0.003136 |
| 104407 | 1373736 | 3951049 | 446.206 | 446.15 | -0.056 | 0.003136 |
| 101593 | 1352134 | 3969069 | 450.586 | 450.53 | -0.056 | 0.003136 |
| 103433 | 1379601 | 3971903 | 452.596 | 452.54 | -0.056 | 0.003136 |
| 100427 | 1349456 | 3967942 | 459.516 | 459.46 | -0.056 | 0.003136 |
| 106745 | 1421799 | 3971799 | 471.406 | 471.35 | -0.056 | 0.003136 |
| 105869 | 1422533 | 3948559 | 478.536 | 478.48 | -0.056 | 0.003136 |
| 105726 | 1424897 | 3941699 | 486.276 | 486.22 | -0.056 | 0.003136 |
| 105734 | 1424501 | 3941923 | 486.406 | 486.35 | -0.056 | 0.003136 |
| 101394 | 1345829 | 3961264 | 436.845 | 436.79 | -0.055 | 0.003025 |
| 101384 | 1345647 | 3960937 | 436.955 | 436.9  | -0.055 | 0.003025 |
| 100165 | 1358234 | 3964590 | 437.105 | 437.05 | -0.055 | 0.003025 |
| 103736 | 1374027 | 3960785 | 445.685 | 445.63 | -0.055 | 0.003025 |
| 103461 | 1379548 | 3971065 | 449.865 | 449.81 | -0.055 | 0.003025 |
| 100381 | 1351902 | 3969093 | 450.995 | 450.94 | -0.055 | 0.003025 |
| 100409 | 1350792 | 3969040 | 454.975 | 454.92 | -0.055 | 0.003025 |
| 103610 | 1375057 | 3966064 | 457.695 | 457.64 | -0.055 | 0.003025 |
| 107662 | 1395429 | 3954097 | 458.635 | 458.58 | -0.055 | 0.003025 |
| 106286 | 1421824 | 3972194 | 471.215 | 471.16 | -0.055 | 0.003025 |
| 103380 | 1379604 | 3973737 | 471.765 | 471.71 | -0.055 | 0.003025 |
| 106069 | 1420753 | 3958269 | 473.785 | 473.73 | -0.055 | 0.003025 |
| 101842 | 1357775 | 3974061 | 474.575 | 474.52 | -0.055 | 0.003025 |
| 101207 | 1338115 | 3951885 | 432.444 | 432.39 | -0.054 | 0.002916 |
| 100044 | 1357436 | 3959884 | 437.024 | 436.97 | -0.054 | 0.002916 |
| 103702 | 1374181 | 3962332 | 450.104 | 450.05 | -0.054 | 0.002916 |
| 106123 | 1420878 | 3964026 | 471.894 | 471.84 | -0.054 | 0.002916 |
| 106296 | 1421834 | 3972736 | 474.464 | 474.41 | -0.054 | 0.002916 |
| 106724 | 1421819 | 3972831 | 474.764 | 474.71 | -0.054 | 0.002916 |
| 105972 | 1420677 | 3953678 | 475.414 | 475.36 | -0.054 | 0.002916 |
| 101843 | 1357745 | 3974086 | 475.574 | 475.52 | -0.054 | 0.002916 |
| 105703 | 1426241 | 3941278 | 487.324 | 487.27 | -0.054 | 0.002916 |
| 5540   | 1389081 | 4005926 | 743.984 | 743.93 | -0.054 | 0.002916 |
| 100228 | 1358321 | 3967975 | 437.983 | 437.93 | -0.053 | 0.002809 |
| 101447 | 1347205 | 3963848 | 440.163 | 440.11 | -0.053 | 0.002809 |
| 101495 | 1348459 | 3966076 | 456.913 | 456.86 | -0.053 | 0.002809 |
| 107464 | 1401852 | 3961182 | 460.313 | 460.26 | -0.053 | 0.002809 |
| 101839 | 1357867 | 3973983 | 471.093 | 471.04 | -0.053 | 0.002809 |

|        |         |         |         |        |        |          |
|--------|---------|---------|---------|--------|--------|----------|
| 106771 | 1421776 | 3970523 | 471.963 | 471.91 | -0.053 | 0.002809 |
| 105959 | 1421057 | 3953107 | 475.423 | 475.37 | -0.053 | 0.002809 |
| 106690 | 1421853 | 3974628 | 482.253 | 482.2  | -0.053 | 0.002809 |
| 105718 | 1425363 | 3941549 | 485.543 | 485.49 | -0.053 | 0.002809 |
| 105546 | 1429993 | 3935348 | 493.403 | 493.35 | -0.053 | 0.002809 |
| 101869 | 1356921 | 3974987 | 494.643 | 494.59 | -0.053 | 0.002809 |
| 105470 | 1429075 | 3932734 | 495.753 | 495.7  | -0.053 | 0.002809 |
| 105469 | 1429074 | 3932700 | 495.883 | 495.83 | -0.053 | 0.002809 |
| 100151 | 1358220 | 3964007 | 435.062 | 435.01 | -0.052 | 0.002704 |
| 103977 | 1373718 | 3950776 | 447.882 | 447.83 | -0.052 | 0.002704 |
| 101589 | 1351956 | 3969071 | 450.682 | 450.63 | -0.052 | 0.002704 |
| 104151 | 1372678 | 3947691 | 450.742 | 450.69 | -0.052 | 0.002704 |
| 101577 | 1351446 | 3969073 | 451.322 | 451.27 | -0.052 | 0.002704 |
| 101570 | 1351166 | 3969063 | 451.672 | 451.62 | -0.052 | 0.002704 |
| 103496 | 1378590 | 3969828 | 451.912 | 451.86 | -0.052 | 0.002704 |
| 106264 | 1421803 | 3971057 | 470.172 | 470.12 | -0.052 | 0.002704 |
| 105551 | 1430072 | 3935498 | 493.362 | 493.31 | -0.052 | 0.002704 |
| 101090 | 1334502 | 3948015 | 573.982 | 573.93 | -0.052 | 0.002704 |
| 100818 | 1340562 | 3953704 | 432.871 | 432.82 | -0.051 | 0.002601 |
| 100961 | 1335709 | 3949903 | 435.371 | 435.32 | -0.051 | 0.002601 |
| 100094 | 1358162 | 3961849 | 435.441 | 435.39 | -0.051 | 0.002601 |
| 100585 | 1346187 | 3961935 | 436.761 | 436.71 | -0.051 | 0.002601 |
| 101132 | 1335544 | 3949714 | 437.541 | 437.49 | -0.051 | 0.002601 |
| 103842 | 1373854 | 3956220 | 445.771 | 445.72 | -0.051 | 0.002601 |
| 100372 | 1352301 | 3969076 | 449.441 | 449.39 | -0.051 | 0.002601 |
| 100451 | 1348939 | 3967011 | 459.831 | 459.78 | -0.051 | 0.002601 |
| 106869 | 1420866 | 3964153 | 471.431 | 471.38 | -0.051 | 0.002601 |
| 106291 | 1421829 | 3972486 | 473.431 | 473.38 | -0.051 | 0.002601 |
| 105935 | 1421464 | 3951920 | 475.861 | 475.81 | -0.051 | 0.002601 |
| 101189 | 1337425 | 3951543 | 432.73  | 432.68 | -0.05  | 0.0025   |
| 100209 | 1358301 | 3967135 | 435.68  | 435.63 | -0.05  | 0.0025   |
| 100116 | 1358190 | 3962805 | 436.04  | 435.99 | -0.05  | 0.0025   |
| 103816 | 1373876 | 3957334 | 446.41  | 446.36 | -0.05  | 0.0025   |
| 100367 | 1352526 | 3969069 | 447.78  | 447.73 | -0.05  | 0.0025   |
| 103454 | 1379595 | 3971354 | 449.35  | 449.3  | -0.05  | 0.0025   |
| 104219 | 1372687 | 3947685 | 450.85  | 450.8  | -0.05  | 0.0025   |
| 101831 | 1358098 | 3973737 | 460.53  | 460.48 | -0.05  | 0.0025   |
| 105953 | 1421170 | 3952830 | 475.13  | 475.08 | -0.05  | 0.0025   |
| 105723 | 1425076 | 3941635 | 485.85  | 485.8  | -0.05  | 0.0025   |
| 105555 | 1430163 | 3935675 | 493.88  | 493.83 | -0.05  | 0.0025   |
| 100928 | 1336681 | 3950912 | 432.709 | 432.66 | -0.049 | 0.002401 |
| 101175 | 1336899 | 3951116 | 433.009 | 432.96 | -0.049 | 0.002401 |
| 100865 | 1339013 | 3952297 | 433.939 | 433.89 | -0.049 | 0.002401 |
| 100212 | 1358304 | 3967269 | 435.459 | 435.41 | -0.049 | 0.002401 |
| 100033 | 1357201 | 3959765 | 436.039 | 435.99 | -0.049 | 0.002401 |
| 103741 | 1374023 | 3960595 | 445.589 | 445.54 | -0.049 | 0.002401 |
| 104423 | 1373744 | 3951386 | 446.649 | 446.6  | -0.049 | 0.002401 |
| 100385 | 1351733 | 3969101 | 451.099 | 451.05 | -0.049 | 0.002401 |
| 106223 | 1421776 | 3969732 | 472.809 | 472.76 | -0.049 | 0.002401 |
| 105979 | 1420456 | 3953878 | 475.519 | 475.47 | -0.049 | 0.002401 |
| 105474 | 1429103 | 3932901 | 495.369 | 495.32 | -0.049 | 0.002401 |
| 105449 | 1429153 | 3931833 | 495.579 | 495.53 | -0.049 | 0.002401 |

|        |         |         |         |        |        |          |
|--------|---------|---------|---------|--------|--------|----------|
| 101297 | 1343664 | 3957406 | 433.788 | 433.74 | -0.048 | 0.002304 |
| 101357 | 1345081 | 3959934 | 436.828 | 436.78 | -0.048 | 0.002304 |
| 100243 | 1358341 | 3968605 | 437.058 | 437.01 | -0.048 | 0.002304 |
| 103739 | 1374025 | 3960669 | 445.628 | 445.58 | -0.048 | 0.002304 |
| 101808 | 1358388 | 3972660 | 445.768 | 445.72 | -0.048 | 0.002304 |
| 104480 | 1373792 | 3953004 | 447.378 | 447.33 | -0.048 | 0.002304 |
| 104225 | 1372733 | 3947763 | 451.178 | 451.13 | -0.048 | 0.002304 |
| 103477 | 1379250 | 3970410 | 451.678 | 451.63 | -0.048 | 0.002304 |
| 100499 | 1347929 | 3965200 | 454.338 | 454.29 | -0.048 | 0.002304 |
| 106180 | 1420944 | 3966975 | 471.568 | 471.52 | -0.048 | 0.002304 |
| 106239 | 1421796 | 3970371 | 471.968 | 471.92 | -0.048 | 0.002304 |
| 106819 | 1420918 | 3966878 | 472.218 | 472.17 | -0.048 | 0.002304 |
| 105729 | 1424735 | 3941776 | 486.208 | 486.16 | -0.048 | 0.002304 |
| 105475 | 1429112 | 3932932 | 495.349 | 495.3  | -0.048 | 0.002304 |
| 100825 | 1340361 | 3953474 | 432.867 | 432.82 | -0.047 | 0.002209 |
| 100712 | 1343573 | 3957278 | 432.977 | 432.93 | -0.047 | 0.002209 |
| 103943 | 1373739 | 3951742 | 446.487 | 446.44 | -0.047 | 0.002209 |
| 101811 | 1358390 | 3972796 | 446.917 | 446.87 | -0.047 | 0.002209 |
| 101584 | 1351740 | 3969069 | 450.827 | 450.78 | -0.047 | 0.002209 |
| 100395 | 1351314 | 3969118 | 453.247 | 453.2  | -0.047 | 0.002209 |
| 100496 | 1347992 | 3965313 | 454.677 | 454.63 | -0.047 | 0.002209 |
| 107612 | 1396196 | 3956702 | 456.417 | 456.37 | -0.047 | 0.002209 |
| 107560 | 1397255 | 3959107 | 459.027 | 458.98 | -0.047 | 0.002209 |
| 107564 | 1397094 | 3958961 | 459.447 | 459.4  | -0.047 | 0.002209 |
| 100441 | 1349154 | 3967394 | 460.397 | 460.35 | -0.047 | 0.002209 |
| 105947 | 1421275 | 3952505 | 474.667 | 474.62 | -0.047 | 0.002209 |
| 103368 | 1379651 | 3974282 | 484.287 | 484.24 | -0.047 | 0.002209 |
| 100809 | 1340823 | 3954004 | 432.486 | 432.44 | -0.046 | 0.002116 |
| 100650 | 1344867 | 3959581 | 437.027 | 436.98 | -0.046 | 0.002116 |
| 103909 | 1373782 | 3953093 | 447.326 | 447.28 | -0.046 | 0.002116 |
| 103458 | 1379573 | 3971191 | 449.466 | 449.42 | -0.046 | 0.002116 |
| 104221 | 1372702 | 3947709 | 450.976 | 450.93 | -0.046 | 0.002116 |
| 101826 | 1358218 | 3973543 | 455.146 | 455.1  | -0.046 | 0.002116 |
| 107554 | 1397506 | 3959280 | 458.716 | 458.67 | -0.046 | 0.002116 |
| 107557 | 1397361 | 3959186 | 458.926 | 458.88 | -0.046 | 0.002116 |
| 100457 | 1348811 | 3966780 | 459.066 | 459.02 | -0.046 | 0.002116 |
| 101535 | 1349408 | 3967770 | 459.326 | 459.28 | -0.046 | 0.002116 |
| 106063 | 1420748 | 3957932 | 474.606 | 474.56 | -0.046 | 0.002116 |
| 105737 | 1424355 | 3942044 | 486.366 | 486.32 | -0.046 | 0.002116 |
| 100785 | 1341502 | 3954780 | 432.765 | 432.72 | -0.045 | 0.002025 |
| 101400 | 1345984 | 3961540 | 436.685 | 436.64 | -0.045 | 0.002025 |
| 100062 | 1358073 | 3960446 | 436.835 | 436.79 | -0.045 | 0.002025 |
| 103756 | 1373867 | 3960122 | 444.125 | 444.08 | -0.045 | 0.002025 |
| 100972 | 1335372 | 3949554 | 445.515 | 445.47 | -0.045 | 0.002025 |
| 104437 | 1373749 | 3951670 | 446.875 | 446.83 | -0.045 | 0.002025 |
| 103879 | 1373816 | 3954374 | 446.985 | 446.94 | -0.045 | 0.002025 |
| 103880 | 1373815 | 3954330 | 447.125 | 447.08 | -0.045 | 0.002025 |
| 103519 | 1377871 | 3969347 | 448.245 | 448.2  | -0.045 | 0.002025 |
| 107538 | 1398270 | 3959641 | 457.635 | 457.59 | -0.045 | 0.002025 |
| 106134 | 1420890 | 3964524 | 470.345 | 470.3  | -0.045 | 0.002025 |
| 105985 | 1420298 | 3954001 | 476.045 | 476    | -0.045 | 0.002025 |
| 105478 | 1429150 | 3933056 | 495.045 | 495    | -0.045 | 0.002025 |

|        |         |         |         |        |        |          |
|--------|---------|---------|---------|--------|--------|----------|
| 105463 | 1429099 | 3932429 | 495.635 | 495.59 | -0.045 | 0.002025 |
| 100176 | 1358264 | 3965715 | 436.804 | 436.76 | -0.044 | 0.001936 |
| 104444 | 1373753 | 3951852 | 446.154 | 446.11 | -0.044 | 0.001936 |
| 103564 | 1376412 | 3968370 | 446.254 | 446.21 | -0.044 | 0.001936 |
| 104503 | 1373825 | 3954202 | 447.224 | 447.18 | -0.044 | 0.001936 |
| 107681 | 1395048 | 3953127 | 463.194 | 463.15 | -0.044 | 0.001936 |
| 106939 | 1420731 | 3957895 | 474.734 | 474.69 | -0.044 | 0.001936 |
| 105857 | 1422864 | 3947961 | 478.005 | 477.96 | -0.044 | 0.001936 |
| 100904 | 1337476 | 3951594 | 433.143 | 433.1  | -0.043 | 0.001849 |
| 100610 | 1345650 | 3960978 | 436.993 | 436.95 | -0.043 | 0.001849 |
| 101750 | 1358370 | 3970225 | 440.263 | 440.22 | -0.043 | 0.001849 |
| 101612 | 1352984 | 3969038 | 444.723 | 444.68 | -0.043 | 0.001849 |
| 100495 | 1348013 | 3965351 | 454.853 | 454.81 | -0.043 | 0.001849 |
| 107510 | 1399677 | 3960279 | 458.993 | 458.95 | -0.043 | 0.001849 |
| 106196 | 1421291 | 3967898 | 467.824 | 467.78 | -0.043 | 0.001849 |
| 105976 | 1420542 | 3953811 | 475.583 | 475.54 | -0.043 | 0.001849 |
| 105648 | 1428519 | 3939547 | 489.433 | 489.39 | -0.043 | 0.001849 |
| 100902 | 1337550 | 3951637 | 433.132 | 433.09 | -0.042 | 0.001764 |
| 100102 | 1358171 | 3962195 | 436.652 | 436.61 | -0.042 | 0.001764 |
| 101610 | 1352895 | 3969042 | 445.092 | 445.05 | -0.042 | 0.001764 |
| 100362 | 1352747 | 3969066 | 445.962 | 445.92 | -0.042 | 0.001764 |
| 103677 | 1374720 | 3963333 | 448.382 | 448.34 | -0.042 | 0.001764 |
| 103689 | 1374467 | 3962884 | 448.522 | 448.48 | -0.042 | 0.001764 |
| 103511 | 1378070 | 3969481 | 449.852 | 449.81 | -0.042 | 0.001764 |
| 100397 | 1351230 | 3969114 | 453.552 | 453.51 | -0.042 | 0.001764 |
| 101532 | 1349358 | 3967681 | 459.382 | 459.34 | -0.042 | 0.001764 |
| 105717 | 1425411 | 3941536 | 485.622 | 485.58 | -0.042 | 0.001764 |
| 105641 | 1428778 | 3939322 | 489.832 | 489.79 | -0.042 | 0.001764 |
| 101736 | 1358364 | 3969334 | 435.751 | 435.71 | -0.041 | 0.001681 |
| 101332 | 1344463 | 3958831 | 436.901 | 436.86 | -0.041 | 0.001681 |
| 103698 | 1374260 | 3962510 | 450.621 | 450.58 | -0.041 | 0.001681 |
| 101562 | 1350862 | 3969010 | 452.421 | 452.38 | -0.041 | 0.001681 |
| 107450 | 1402590 | 3961419 | 461.391 | 461.35 | -0.041 | 0.001681 |
| 106068 | 1420752 | 3958226 | 474.091 | 474.05 | -0.041 | 0.001681 |
| 106043 | 1420730 | 3956914 | 474.831 | 474.79 | -0.041 | 0.001681 |
| 106032 | 1420718 | 3956408 | 475.031 | 474.99 | -0.041 | 0.001681 |
| 106300 | 1421839 | 3972945 | 475.161 | 475.12 | -0.041 | 0.001681 |
| 100806 | 1340910 | 3954104 | 432.72  | 432.68 | -0.04  | 0.0016   |
| 101291 | 1343397 | 3956983 | 433.49  | 433.45 | -0.04  | 0.0016   |
| 101303 | 1343860 | 3957755 | 434.57  | 434.53 | -0.04  | 0.0016   |
| 101607 | 1352762 | 3969047 | 445.99  | 445.95 | -0.04  | 0.0016   |
| 103925 | 1373762 | 3952504 | 447.14  | 447.1  | -0.04  | 0.0016   |
| 104379 | 1373713 | 3950453 | 453.52  | 453.48 | -0.04  | 0.0016   |
| 100464 | 1348659 | 3966508 | 458.11  | 458.07 | -0.04  | 0.0016   |
| 107484 | 1400925 | 3960827 | 460.62  | 460.58 | -0.04  | 0.0016   |
| 106827 | 1420911 | 3966527 | 472.5   | 472.46 | -0.04  | 0.0016   |
| 106881 | 1420852 | 3963529 | 473.65  | 473.61 | -0.04  | 0.0016   |
| 105977 | 1420513 | 3953835 | 475.57  | 475.53 | -0.04  | 0.0016   |
| 105716 | 1425458 | 3941521 | 485.64  | 485.6  | -0.04  | 0.0016   |
| 105621 | 1429415 | 3938767 | 490.16  | 490.12 | -0.04  | 0.0016   |
| 101776 | 1358371 | 3971269 | 439.709 | 439.67 | -0.039 | 0.001521 |
| 100969 | 1335463 | 3949649 | 440.009 | 439.97 | -0.039 | 0.001521 |

|        |         |         |         |        |        |          |
|--------|---------|---------|---------|--------|--------|----------|
| 103873 | 1373822 | 3954694 | 446.289 | 446.25 | -0.039 | 0.001521 |
| 104476 | 1373784 | 3952844 | 447.539 | 447.5  | -0.039 | 0.001521 |
| 101734 | 1358364 | 3969257 | 435.958 | 435.92 | -0.038 | 0.001444 |
| 100646 | 1344956 | 3959741 | 436.958 | 436.92 | -0.038 | 0.001444 |
| 101752 | 1358372 | 3970307 | 440.048 | 440.01 | -0.038 | 0.001444 |
| 101609 | 1352851 | 3969043 | 445.368 | 445.33 | -0.038 | 0.001444 |
| 104452 | 1373760 | 3952083 | 446.088 | 446.05 | -0.038 | 0.001444 |
| 104403 | 1373734 | 3950961 | 446.358 | 446.32 | -0.038 | 0.001444 |
| 103528 | 1377594 | 3969168 | 447.788 | 447.75 | -0.038 | 0.001444 |
| 103446 | 1379602 | 3971645 | 450.618 | 450.58 | -0.038 | 0.001444 |
| 101588 | 1351913 | 3969071 | 450.958 | 450.92 | -0.038 | 0.001444 |
| 103504 | 1378309 | 3969643 | 451.208 | 451.17 | -0.038 | 0.001444 |
| 100422 | 1349573 | 3968140 | 459.829 | 459.79 | -0.038 | 0.001444 |
| 100424 | 1349524 | 3968061 | 459.918 | 459.88 | -0.038 | 0.001444 |
| 107670 | 1395306 | 3953677 | 460.108 | 460.07 | -0.038 | 0.001444 |
| 107685 | 1394916 | 3952981 | 463.498 | 463.46 | -0.038 | 0.001444 |
| 106087 | 1420770 | 3959203 | 474.168 | 474.13 | -0.038 | 0.001444 |
| 106725 | 1421818 | 3972791 | 474.578 | 474.54 | -0.038 | 0.001444 |
| 105739 | 1424289 | 3942109 | 486.308 | 486.27 | -0.038 | 0.001444 |
| 105667 | 1427817 | 3940156 | 488.248 | 488.21 | -0.038 | 0.001444 |
| 105645 | 1428636 | 3939445 | 489.658 | 489.62 | -0.038 | 0.001444 |
| 100056 | 1357896 | 3960168 | 436.727 | 436.69 | -0.037 | 0.001369 |
| 100236 | 1358337 | 3968319 | 437.417 | 437.38 | -0.037 | 0.001369 |
| 103541 | 1377231 | 3968932 | 447.377 | 447.34 | -0.037 | 0.001369 |
| 103505 | 1378273 | 3969619 | 450.977 | 450.94 | -0.037 | 0.001369 |
| 101581 | 1351612 | 3969072 | 451.107 | 451.07 | -0.037 | 0.001369 |
| 100489 | 1348139 | 3965577 | 455.697 | 455.66 | -0.037 | 0.001369 |
| 100456 | 1348832 | 3966819 | 459.077 | 459.04 | -0.037 | 0.001369 |
| 107565 | 1397036 | 3958901 | 459.527 | 459.49 | -0.037 | 0.001369 |
| 106263 | 1421803 | 3971019 | 470.237 | 470.2  | -0.037 | 0.001369 |
| 106865 | 1420872 | 3964362 | 470.757 | 470.72 | -0.037 | 0.001369 |
| 106870 | 1420864 | 3964068 | 471.707 | 471.67 | -0.037 | 0.001369 |
| 101840 | 1357836 | 3974010 | 472.227 | 472.19 | -0.037 | 0.001369 |
| 106998 | 1420660 | 3955186 | 475.397 | 475.36 | -0.037 | 0.001369 |
| 105405 | 1429140 | 3930434 | 496.937 | 496.9  | -0.037 | 0.001369 |
| 101094 | 1334635 | 3948243 | 568.727 | 568.69 | -0.037 | 0.001369 |
| 100790 | 1341362 | 3954622 | 432.696 | 432.66 | -0.036 | 0.001296 |
| 100913 | 1337159 | 3951372 | 433.396 | 433.36 | -0.036 | 0.001296 |
| 100077 | 1358143 | 3961121 | 436.126 | 436.09 | -0.036 | 0.001296 |
| 101757 | 1358378 | 3970514 | 439.876 | 439.84 | -0.036 | 0.001296 |
| 100529 | 1347276 | 3964034 | 440.856 | 440.82 | -0.036 | 0.001296 |
| 103586 | 1375839 | 3967670 | 443.006 | 442.97 | -0.036 | 0.001296 |
| 103832 | 1373865 | 3956622 | 446.026 | 445.99 | -0.036 | 0.001296 |
| 103632 | 1374982 | 3965050 | 446.036 | 446    | -0.036 | 0.001296 |
| 103881 | 1373814 | 3954285 | 447.176 | 447.14 | -0.036 | 0.001296 |
| 101514 | 1348938 | 3966931 | 459.526 | 459.49 | -0.036 | 0.001296 |
| 100979 | 1335165 | 3949341 | 465.956 | 465.92 | -0.036 | 0.001296 |
| 106808 | 1420998 | 3967334 | 471.166 | 471.13 | -0.036 | 0.001296 |
| 100985 | 1335000 | 3949170 | 486.906 | 486.87 | -0.036 | 0.001296 |
| 103363 | 1379709 | 3974510 | 488.507 | 488.47 | -0.036 | 0.001296 |
| 105655 | 1428274 | 3939759 | 488.866 | 488.83 | -0.036 | 0.001296 |
| 105519 | 1429541 | 3934283 | 493.346 | 493.31 | -0.036 | 0.001296 |

|        |         |         |         |        |        |          |
|--------|---------|---------|---------|--------|--------|----------|
| 5534   | 1388855 | 4005696 | 741.136 | 741.1  | -0.036 | 0.001296 |
| 100761 | 1342185 | 3955562 | 433.165 | 433.13 | -0.035 | 0.001225 |
| 100590 | 1346076 | 3961738 | 436.485 | 436.45 | -0.035 | 0.001225 |
| 101122 | 1335205 | 3949364 | 462.175 | 462.14 | -0.035 | 0.001225 |
| 101023 | 1334264 | 3947830 | 567.685 | 567.65 | -0.035 | 0.001225 |
| 100787 | 1341446 | 3954717 | 432.754 | 432.72 | -0.034 | 0.001156 |
| 101147 | 1336020 | 3950207 | 433.314 | 433.28 | -0.034 | 0.001156 |
| 100616 | 1345531 | 3960767 | 436.944 | 436.91 | -0.034 | 0.001156 |
| 103577 | 1376029 | 3967925 | 444.104 | 444.07 | -0.034 | 0.001156 |
| 101603 | 1352584 | 3969053 | 447.434 | 447.4  | -0.034 | 0.001156 |
| 103480 | 1379165 | 3970301 | 451.863 | 451.83 | -0.034 | 0.001156 |
| 104389 | 1373723 | 3950644 | 453.024 | 452.99 | -0.034 | 0.001156 |
| 107617 | 1396118 | 3956435 | 456.294 | 456.26 | -0.034 | 0.001156 |
| 107641 | 1395761 | 3955221 | 458.634 | 458.6  | -0.034 | 0.001156 |
| 101530 | 1349321 | 3967615 | 459.574 | 459.54 | -0.034 | 0.001156 |
| 106255 | 1421801 | 3970723 | 471.474 | 471.44 | -0.034 | 0.001156 |
| 106009 | 1420682 | 3955238 | 475.754 | 475.72 | -0.034 | 0.001156 |
| 105623 | 1429371 | 3938806 | 490.154 | 490.12 | -0.034 | 0.001156 |
| 105516 | 1429513 | 3934186 | 493.184 | 493.15 | -0.034 | 0.001156 |
| 105539 | 1429922 | 3935215 | 493.634 | 493.6  | -0.034 | 0.001156 |
| 100762 | 1342155 | 3955527 | 433.203 | 433.17 | -0.033 | 0.001089 |
| 101611 | 1352939 | 3969040 | 444.843 | 444.81 | -0.033 | 0.001089 |
| 103966 | 1373728 | 3951082 | 446.313 | 446.28 | -0.033 | 0.001089 |
| 103914 | 1373774 | 3952898 | 447.493 | 447.46 | -0.033 | 0.001089 |
| 103683 | 1374600 | 3963119 | 448.693 | 448.66 | -0.033 | 0.001089 |
| 104167 | 1372536 | 3947441 | 450.533 | 450.5  | -0.033 | 0.001089 |
| 107606 | 1396272 | 3956955 | 456.103 | 456.07 | -0.033 | 0.001089 |
| 106755 | 1421789 | 3971275 | 469.733 | 469.7  | -0.033 | 0.001089 |
| 106145 | 1420901 | 3965018 | 470.433 | 470.4  | -0.033 | 0.001089 |
| 105982 | 1420353 | 3953946 | 475.423 | 475.39 | -0.033 | 0.001089 |
| 105712 | 1425694 | 3941451 | 485.603 | 485.57 | -0.033 | 0.001089 |
| 101046 | 1333133 | 3947134 | 551.513 | 551.48 | -0.033 | 0.001089 |
| 5544   | 1389229 | 4006075 | 746.043 | 746.01 | -0.033 | 0.001089 |
| 100927 | 1336710 | 3950942 | 432.792 | 432.76 | -0.032 | 0.001024 |
| 100108 | 1358178 | 3962461 | 436.612 | 436.58 | -0.032 | 0.001024 |
| 100665 | 1344541 | 3958999 | 436.762 | 436.73 | -0.032 | 0.001024 |
| 103535 | 1377423 | 3969056 | 447.612 | 447.58 | -0.032 | 0.001024 |
| 100383 | 1351817 | 3969097 | 450.912 | 450.88 | -0.032 | 0.001024 |
| 104371 | 1373705 | 3950291 | 453.632 | 453.6  | -0.032 | 0.001024 |
| 106862 | 1420875 | 3964484 | 470.412 | 470.38 | -0.032 | 0.001024 |
| 106777 | 1421770 | 3970256 | 472.102 | 472.07 | -0.032 | 0.001024 |
| 105988 | 1420308 | 3954081 | 474.822 | 474.79 | -0.032 | 0.001024 |
| 106331 | 1421873 | 3974637 | 482.302 | 482.27 | -0.032 | 0.001024 |
| 105728 | 1424774 | 3941755 | 486.172 | 486.14 | -0.032 | 0.001024 |
| 100702 | 1343790 | 3957654 | 434.181 | 434.15 | -0.031 | 0.000961 |
| 100604 | 1345775 | 3961201 | 436.791 | 436.76 | -0.031 | 0.000961 |
| 101390 | 1345758 | 3961136 | 436.901 | 436.87 | -0.031 | 0.000961 |
| 100500 | 1347907 | 3965162 | 454.281 | 454.25 | -0.031 | 0.000961 |
| 101555 | 1349857 | 3968430 | 456.471 | 456.44 | -0.031 | 0.000961 |
| 101496 | 1348480 | 3966112 | 457.071 | 457.04 | -0.031 | 0.000961 |
| 107460 | 1402057 | 3961258 | 460.481 | 460.45 | -0.031 | 0.000961 |
| 106864 | 1420873 | 3964403 | 470.691 | 470.66 | -0.031 | 0.000961 |



|        |         |         |         |        |        |          |
|--------|---------|---------|---------|--------|--------|----------|
| 106131 | 1420887 | 3964383 | 470.691 | 470.66 | -0.031 | 0.000961 |
| 106262 | 1421802 | 3970950 | 470.942 | 470.91 | -0.031 | 0.000961 |
| 106811 | 1420966 | 3967211 | 471.811 | 471.78 | -0.031 | 0.000961 |
| 106909 | 1420760 | 3959378 | 475.002 | 474.97 | -0.031 | 0.000961 |
| 106002 | 1420617 | 3954870 | 475.761 | 475.73 | -0.031 | 0.000961 |
| 106685 | 1421858 | 3974885 | 484.941 | 484.91 | -0.031 | 0.000961 |
| 101853 | 1357434 | 3974340 | 485.191 | 485.16 | -0.031 | 0.000961 |
| 101016 | 1334497 | 3948028 | 573.461 | 573.43 | -0.031 | 0.000961 |
| 101173 | 1336838 | 3951054 | 432.93  | 432.9  | -0.03  | 0.0009   |
| 101176 | 1336930 | 3951148 | 433.07  | 433.04 | -0.03  | 0.0009   |
| 101137 | 1335701 | 3949876 | 435.27  | 435.24 | -0.03  | 0.0009   |
| 101315 | 1344101 | 3958184 | 436.08  | 436.05 | -0.03  | 0.0009   |
| 100648 | 1344912 | 3959662 | 436.93  | 436.9  | -0.03  | 0.0009   |
| 100613 | 1345591 | 3960872 | 436.96  | 436.93 | -0.03  | 0.0009   |
| 103723 | 1374042 | 3961323 | 446.29  | 446.26 | -0.03  | 0.0009   |
| 103566 | 1376350 | 3968311 | 446.34  | 446.31 | -0.03  | 0.0009   |
| 104422 | 1373744 | 3951366 | 446.65  | 446.62 | -0.03  | 0.0009   |
| 103618 | 1375016 | 3965688 | 449.42  | 449.39 | -0.03  | 0.0009   |
| 101492 | 1348376 | 3965927 | 456.5   | 456.47 | -0.03  | 0.0009   |
| 106271 | 1421808 | 3971438 | 469.74  | 469.71 | -0.03  | 0.0009   |
| 106113 | 1420867 | 3963572 | 473.59  | 473.56 | -0.03  | 0.0009   |
| 106941 | 1420730 | 3957820 | 474.71  | 474.68 | -0.03  | 0.0009   |
| 106039 | 1420726 | 3956723 | 475.09  | 475.06 | -0.03  | 0.0009   |
| 105635 | 1428991 | 3939136 | 490.17  | 490.14 | -0.03  | 0.0009   |
| 101862 | 1357119 | 3974637 | 491.94  | 491.91 | -0.03  | 0.0009   |
| 101248 | 1340825 | 3953987 | 432.889 | 432.86 | -0.029 | 0.000841 |
| 100087 | 1358155 | 3961555 | 435.039 | 435.01 | -0.029 | 0.000841 |
| 101738 | 1358362 | 3969414 | 435.799 | 435.77 | -0.029 | 0.000841 |
| 101615 | 1353118 | 3969032 | 444.779 | 444.75 | -0.029 | 0.000841 |
| 103745 | 1374018 | 3960450 | 445.429 | 445.4  | -0.029 | 0.000841 |
| 101810 | 1358389 | 3972750 | 446.619 | 446.59 | -0.029 | 0.000841 |
| 104380 | 1373714 | 3950472 | 453.559 | 453.53 | -0.029 | 0.000841 |
| 101520 | 1349085 | 3967195 | 460.289 | 460.26 | -0.029 | 0.000841 |
| 101837 | 1357928 | 3973928 | 468.489 | 468.46 | -0.029 | 0.000841 |
| 106222 | 1421775 | 3969709 | 472.69  | 472.66 | -0.029 | 0.000841 |
| 105983 | 1420334 | 3953958 | 475.449 | 475.42 | -0.029 | 0.000841 |
| 101022 | 1334303 | 3947854 | 569.259 | 569.23 | -0.029 | 0.000841 |
| 101287 | 1343125 | 3956623 | 433.368 | 433.34 | -0.028 | 0.000784 |
| 100140 | 1358212 | 3963601 | 434.768 | 434.74 | -0.028 | 0.000784 |
| 100184 | 1358273 | 3966061 | 438.388 | 438.36 | -0.028 | 0.000784 |
| 101795 | 1358377 | 3972084 | 442.458 | 442.43 | -0.028 | 0.000784 |
| 103732 | 1374032 | 3960947 | 445.858 | 445.83 | -0.028 | 0.000784 |
| 103635 | 1374976 | 3964925 | 446.048 | 446.02 | -0.028 | 0.000784 |
| 104511 | 1373835 | 3954598 | 446.458 | 446.43 | -0.028 | 0.000784 |
| 103552 | 1376833 | 3968674 | 446.628 | 446.6  | -0.028 | 0.000784 |
| 104398 | 1373730 | 3950846 | 446.838 | 446.81 | -0.028 | 0.000784 |
| 101468 | 1347751 | 3964806 | 453.228 | 453.2  | -0.028 | 0.000784 |
| 104368 | 1373702 | 3950229 | 453.658 | 453.63 | -0.028 | 0.000784 |
| 100491 | 1348097 | 3965501 | 455.528 | 455.5  | -0.028 | 0.000784 |
| 107615 | 1396152 | 3956551 | 456.138 | 456.11 | -0.028 | 0.000784 |
| 101533 | 1349375 | 3967710 | 459.328 | 459.3  | -0.028 | 0.000784 |
| 107468 | 1401661 | 3961108 | 460.378 | 460.35 | -0.028 | 0.000784 |

|        |         |         |         |        |        |          |
|--------|---------|---------|---------|--------|--------|----------|
| 107467 | 1401698 | 3961123 | 460.418 | 460.39 | -0.028 | 0.000784 |
| 106817 | 1420925 | 3966963 | 472.138 | 472.11 | -0.028 | 0.000784 |
| 106309 | 1421847 | 3973418 | 476.828 | 476.8  | -0.028 | 0.000784 |
| 105438 | 1429142 | 3931320 | 495.668 | 495.64 | -0.028 | 0.000784 |
| 5550   | 1389458 | 4006308 | 749.138 | 749.11 | -0.028 | 0.000784 |
| 100222 | 1358315 | 3967712 | 436.347 | 436.32 | -0.027 | 0.000729 |
| 101366 | 1345273 | 3960278 | 436.957 | 436.93 | -0.027 | 0.000729 |
| 101761 | 1358383 | 3970685 | 439.357 | 439.33 | -0.027 | 0.000729 |
| 103792 | 1373710 | 3958948 | 444.517 | 444.49 | -0.027 | 0.000729 |
| 103725 | 1374039 | 3961241 | 446.157 | 446.13 | -0.027 | 0.000729 |
| 104413 | 1373738 | 3951174 | 446.537 | 446.51 | -0.027 | 0.000729 |
| 104500 | 1373821 | 3954043 | 447.037 | 447.01 | -0.027 | 0.000729 |
| 103902 | 1373790 | 3953366 | 447.137 | 447.11 | -0.027 | 0.000729 |
| 104386 | 1373721 | 3950585 | 454.267 | 454.24 | -0.027 | 0.000729 |
| 107511 | 1399638 | 3960261 | 458.917 | 458.89 | -0.027 | 0.000729 |
| 106257 | 1421800 | 3970774 | 471.177 | 471.15 | -0.027 | 0.000729 |
| 106057 | 1420743 | 3957639 | 474.757 | 474.73 | -0.027 | 0.000729 |
| 106952 | 1420719 | 3957312 | 474.807 | 474.78 | -0.027 | 0.000729 |
| 105643 | 1428722 | 3939371 | 489.677 | 489.65 | -0.027 | 0.000729 |
| 100797 | 1341168 | 3954399 | 433.026 | 433    | -0.026 | 0.000676 |
| 100813 | 1340707 | 3953870 | 433.166 | 433.14 | -0.026 | 0.000676 |
| 101395 | 1345848 | 3961298 | 436.906 | 436.88 | -0.026 | 0.000676 |
| 101444 | 1347120 | 3963688 | 439.916 | 439.89 | -0.026 | 0.000676 |
| 103783 | 1373653 | 3959305 | 443.676 | 443.65 | -0.026 | 0.000676 |
| 104439 | 1373751 | 3951717 | 446.616 | 446.59 | -0.026 | 0.000676 |
| 103551 | 1376869 | 3968698 | 446.986 | 446.96 | -0.026 | 0.000676 |
| 103924 | 1373763 | 3952539 | 447.206 | 447.18 | -0.026 | 0.000676 |
| 103543 | 1377160 | 3968886 | 447.366 | 447.34 | -0.026 | 0.000676 |
| 103684 | 1374579 | 3963081 | 448.656 | 448.63 | -0.026 | 0.000676 |
| 100387 | 1351649 | 3969106 | 451.226 | 451.2  | -0.026 | 0.000676 |
| 107552 | 1397617 | 3959339 | 458.616 | 458.59 | -0.026 | 0.000676 |
| 107516 | 1399400 | 3960151 | 458.696 | 458.67 | -0.026 | 0.000676 |
| 106853 | 1420887 | 3964972 | 470.296 | 470.27 | -0.026 | 0.000676 |
| 106187 | 1421103 | 3967557 | 470.366 | 470.34 | -0.026 | 0.000676 |
| 106687 | 1421856 | 3974756 | 482.986 | 482.96 | -0.026 | 0.000676 |
| 105471 | 1429078 | 3932768 | 495.656 | 495.63 | -0.026 | 0.000676 |
| 101170 | 1336748 | 3950961 | 432.775 | 432.75 | -0.025 | 0.000625 |
| 101289 | 1343290 | 3956835 | 433.465 | 433.44 | -0.025 | 0.000625 |
| 101742 | 1358361 | 3969581 | 436.285 | 436.26 | -0.025 | 0.000625 |
| 100225 | 1358317 | 3967844 | 437.315 | 437.29 | -0.025 | 0.000625 |
| 100226 | 1358319 | 3967888 | 437.555 | 437.53 | -0.025 | 0.000625 |
| 103647 | 1374949 | 3964434 | 444.845 | 444.82 | -0.025 | 0.000625 |
| 100360 | 1352833 | 3969064 | 445.275 | 445.25 | -0.025 | 0.000625 |
| 104424 | 1373744 | 3951406 | 446.665 | 446.64 | -0.025 | 0.000625 |
| 104436 | 1373749 | 3951649 | 446.815 | 446.79 | -0.025 | 0.000625 |
| 103980 | 1373716 | 3950713 | 449.915 | 449.89 | -0.025 | 0.000625 |
| 100380 | 1351943 | 3969091 | 450.795 | 450.77 | -0.025 | 0.000625 |
| 100390 | 1351525 | 3969114 | 451.945 | 451.92 | -0.025 | 0.000625 |
| 107686 | 1394889 | 3952957 | 463.405 | 463.38 | -0.025 | 0.000625 |
| 106283 | 1421821 | 3972070 | 471.585 | 471.56 | -0.025 | 0.000625 |
| 106248 | 1421811 | 3970549 | 471.785 | 471.76 | -0.025 | 0.000625 |
| 105846 | 1423225 | 3947468 | 476.625 | 476.6  | -0.025 | 0.000625 |

|        |         |         |         |        |        |          |
|--------|---------|---------|---------|--------|--------|----------|
| 105878 | 1422360 | 3949039 | 476.805 | 476.78 | -0.025 | 0.000625 |
| 105730 | 1424695 | 3941797 | 486.225 | 486.2  | -0.025 | 0.000625 |
| 105694 | 1426699 | 3941054 | 488.195 | 488.17 | -0.025 | 0.000625 |
| 100134 | 1358211 | 3963410 | 435.034 | 435.01 | -0.024 | 0.000576 |
| 100211 | 1358303 | 3967225 | 435.514 | 435.49 | -0.024 | 0.000576 |
| 100244 | 1358341 | 3968639 | 437.144 | 437.12 | -0.024 | 0.000576 |
| 103580 | 1375954 | 3967824 | 443.674 | 443.65 | -0.024 | 0.000576 |
| 103941 | 1373741 | 3951806 | 446.324 | 446.3  | -0.024 | 0.000576 |
| 103883 | 1373811 | 3954194 | 447.214 | 447.19 | -0.024 | 0.000576 |
| 103997 | 1373691 | 3950361 | 453.524 | 453.5  | -0.024 | 0.000576 |
| 107542 | 1398081 | 3959553 | 457.614 | 457.59 | -0.024 | 0.000576 |
| 107523 | 1399030 | 3959982 | 458.404 | 458.38 | -0.024 | 0.000576 |
| 106240 | 1421798 | 3970390 | 471.974 | 471.95 | -0.024 | 0.000576 |
| 106075 | 1420757 | 3958569 | 472.934 | 472.91 | -0.024 | 0.000576 |
| 105884 | 1422257 | 3949370 | 475.704 | 475.68 | -0.024 | 0.000576 |
| 101036 | 1333743 | 3947526 | 548.504 | 548.48 | -0.024 | 0.000576 |
| 100815 | 1340649 | 3953803 | 432.943 | 432.92 | -0.023 | 0.000529 |
| 101247 | 1340796 | 3953953 | 433.023 | 433    | -0.023 | 0.000529 |
| 101737 | 1358363 | 3969373 | 435.813 | 435.79 | -0.023 | 0.000529 |
| 101391 | 1345775 | 3961167 | 436.893 | 436.87 | -0.023 | 0.000529 |
| 101431 | 1346830 | 3963107 | 438.343 | 438.32 | -0.023 | 0.000529 |
| 103752 | 1373964 | 3960220 | 444.363 | 444.34 | -0.023 | 0.000529 |
| 103930 | 1373751 | 3952188 | 446.053 | 446.03 | -0.023 | 0.000529 |
| 101595 | 1352224 | 3969067 | 450.053 | 450.03 | -0.023 | 0.000529 |
| 107553 | 1397543 | 3959300 | 458.703 | 458.68 | -0.023 | 0.000529 |
| 106048 | 1420735 | 3957187 | 474.633 | 474.61 | -0.023 | 0.000529 |
| 105472 | 1429082 | 3932802 | 495.623 | 495.6  | -0.023 | 0.000529 |
| 101081 | 1334198 | 3947776 | 565.423 | 565.4  | -0.023 | 0.000529 |
| 100724 | 1343271 | 3956832 | 433.112 | 433.09 | -0.022 | 0.000484 |
| 100136 | 1358212 | 3963468 | 434.902 | 434.88 | -0.022 | 0.000484 |
| 100168 | 1358239 | 3964731 | 437.342 | 437.32 | -0.022 | 0.000484 |
| 101616 | 1353159 | 3969031 | 444.912 | 444.89 | -0.022 | 0.000484 |
| 104506 | 1373828 | 3954362 | 447.112 | 447.09 | -0.022 | 0.000484 |
| 100376 | 1352116 | 3969083 | 450.542 | 450.52 | -0.022 | 0.000484 |
| 106791 | 1421291 | 3967933 | 467.502 | 467.48 | -0.022 | 0.000484 |
| 106813 | 1420949 | 3967130 | 471.922 | 471.9  | -0.022 | 0.000484 |
| 106221 | 1421775 | 3969684 | 472.472 | 472.45 | -0.022 | 0.000484 |
| 101038 | 1333630 | 3947461 | 544.482 | 544.46 | -0.022 | 0.000484 |
| 100097 | 1358166 | 3961976 | 435.951 | 435.93 | -0.021 | 0.000441 |
| 100643 | 1345018 | 3959854 | 436.771 | 436.75 | -0.021 | 0.000441 |
| 101345 | 1344741 | 3959327 | 437.221 | 437.2  | -0.021 | 0.000441 |
| 103947 | 1373736 | 3951618 | 446.251 | 446.23 | -0.021 | 0.000441 |
| 104513 | 1373836 | 3954677 | 446.331 | 446.31 | -0.021 | 0.000441 |
| 103685 | 1374557 | 3963043 | 448.641 | 448.62 | -0.021 | 0.000441 |
| 100411 | 1350746 | 3969027 | 455.111 | 455.09 | -0.021 | 0.000441 |
| 107529 | 1398698 | 3959833 | 458.091 | 458.07 | -0.021 | 0.000441 |
| 105625 | 1429302 | 3938867 | 490.381 | 490.36 | -0.021 | 0.000441 |
| 101092 | 1334553 | 3948086 | 573.201 | 573.18 | -0.021 | 0.000441 |
| 101160 | 1336456 | 3950654 | 432.72  | 432.7  | -0.02  | 0.0004   |
| 101727 | 1358360 | 3969026 | 436.98  | 436.96 | -0.02  | 0.0004   |
| 101613 | 1353030 | 3969036 | 444.65  | 444.63 | -0.02  | 0.0004   |
| 103970 | 1373726 | 3950965 | 446.46  | 446.44 | -0.02  | 0.0004   |

|        |         |         |         |        |        |          |
|--------|---------|---------|---------|--------|--------|----------|
| 107561 | 1397187 | 3959050 | 459.16  | 459.14 | -0.02  | 0.0004   |
| 101536 | 1349426 | 3967800 | 459.31  | 459.29 | -0.02  | 0.0004   |
| 107470 | 1401552 | 3961065 | 460.3   | 460.28 | -0.02  | 0.0004   |
| 106254 | 1421803 | 3970677 | 471.61  | 471.59 | -0.02  | 0.0004   |
| 106067 | 1420751 | 3958141 | 474.26  | 474.24 | -0.02  | 0.0004   |
| 101845 | 1357685 | 3974136 | 477.75  | 477.73 | -0.02  | 0.0004   |
| 101078 | 1334079 | 3947708 | 560.8   | 560.78 | -0.02  | 0.0004   |
| 100929 | 1336652 | 3950881 | 432.709 | 432.69 | -0.019 | 0.000361 |
| 101217 | 1338524 | 3952066 | 432.739 | 432.72 | -0.019 | 0.000361 |
| 100742 | 1342758 | 3956217 | 433.009 | 432.99 | -0.019 | 0.000361 |
| 101144 | 1335924 | 3950107 | 433.879 | 433.86 | -0.019 | 0.000361 |
| 100031 | 1357151 | 3959740 | 436.039 | 436.02 | -0.019 | 0.000361 |
| 100681 | 1344212 | 3958412 | 436.659 | 436.64 | -0.019 | 0.000361 |
| 101348 | 1344807 | 3959447 | 437.049 | 437.03 | -0.019 | 0.000361 |
| 104457 | 1373764 | 3952218 | 446.069 | 446.05 | -0.019 | 0.000361 |
| 104395 | 1373728 | 3950777 | 447.819 | 447.8  | -0.019 | 0.000361 |
| 101828 | 1358173 | 3973625 | 457.019 | 457    | -0.019 | 0.000361 |
| 107581 | 1396631 | 3958214 | 460.229 | 460.21 | -0.019 | 0.000361 |
| 100980 | 1335137 | 3949312 | 469.449 | 469.43 | -0.019 | 0.000361 |
| 106888 | 1420845 | 3963218 | 473.899 | 473.88 | -0.019 | 0.000361 |
| 101017 | 1334470 | 3947997 | 573.539 | 573.52 | -0.019 | 0.000361 |
| 100875 | 1338584 | 3952107 | 432.908 | 432.89 | -0.018 | 0.000324 |
| 100113 | 1358185 | 3962678 | 436.338 | 436.32 | -0.018 | 0.000324 |
| 101379 | 1345548 | 3960759 | 436.908 | 436.89 | -0.018 | 0.000324 |
| 100542 | 1347009 | 3963514 | 439.868 | 439.85 | -0.018 | 0.000324 |
| 103581 | 1375931 | 3967794 | 443.478 | 443.46 | -0.018 | 0.000324 |
| 104431 | 1373746 | 3951547 | 446.208 | 446.19 | -0.018 | 0.000324 |
| 104434 | 1373748 | 3951609 | 446.378 | 446.36 | -0.018 | 0.000324 |
| 104145 | 1372730 | 3947782 | 451.078 | 451.06 | -0.018 | 0.000324 |
| 103478 | 1379223 | 3970373 | 451.798 | 451.78 | -0.018 | 0.000324 |
| 103491 | 1378780 | 3969953 | 451.918 | 451.9  | -0.018 | 0.000324 |
| 100407 | 1350847 | 3969054 | 454.788 | 454.77 | -0.018 | 0.000324 |
| 106790 | 1421312 | 3967966 | 466.848 | 466.83 | -0.018 | 0.000324 |
| 106294 | 1421831 | 3972611 | 474.108 | 474.09 | -0.018 | 0.000324 |
| 106329 | 1421870 | 3974505 | 481.908 | 481.89 | -0.018 | 0.000324 |
| 101209 | 1338194 | 3951921 | 432.517 | 432.5  | -0.017 | 0.000289 |
| 101162 | 1336514 | 3950714 | 432.717 | 432.7  | -0.017 | 0.000289 |
| 100823 | 1340419 | 3953540 | 432.927 | 432.91 | -0.017 | 0.000289 |
| 101177 | 1336961 | 3951179 | 433.077 | 433.06 | -0.017 | 0.000289 |
| 100061 | 1358052 | 3960398 | 436.767 | 436.75 | -0.017 | 0.000289 |
| 100612 | 1345610 | 3960907 | 436.998 | 436.98 | -0.017 | 0.000289 |
| 101769 | 1358388 | 3970987 | 438.507 | 438.49 | -0.017 | 0.000289 |
| 103800 | 1373750 | 3958611 | 446.017 | 446    | -0.017 | 0.000289 |
| 103706 | 1374117 | 3962143 | 449.687 | 449.67 | -0.017 | 0.000289 |
| 103984 | 1373712 | 3950632 | 453.137 | 453.12 | -0.017 | 0.000289 |
| 107586 | 1396557 | 3957970 | 459.527 | 459.51 | -0.017 | 0.000289 |
| 101838 | 1357897 | 3973956 | 469.847 | 469.83 | -0.017 | 0.000289 |
| 106290 | 1421827 | 3972402 | 472.657 | 472.64 | -0.017 | 0.000289 |
| 101161 | 1336485 | 3950684 | 432.666 | 432.65 | -0.016 | 0.000256 |
| 100821 | 1340476 | 3953605 | 432.836 | 432.82 | -0.016 | 0.000256 |
| 101263 | 1341835 | 3955141 | 432.906 | 432.89 | -0.016 | 0.000256 |
| 100109 | 1358179 | 3962505 | 436.586 | 436.57 | -0.016 | 0.000256 |

|        |         |         |         |        |        |          |
|--------|---------|---------|---------|--------|--------|----------|
| 101408 | 1346193 | 3961911 | 436.746 | 436.73 | -0.016 | 0.000256 |
| 103931 | 1373751 | 3952152 | 445.976 | 445.96 | -0.016 | 0.000256 |
| 103945 | 1373737 | 3951679 | 446.526 | 446.51 | -0.016 | 0.000256 |
| 104400 | 1373731 | 3950891 | 446.576 | 446.56 | -0.016 | 0.000256 |
| 103922 | 1373764 | 3952606 | 447.516 | 447.5  | -0.016 | 0.000256 |
| 103530 | 1377548 | 3969139 | 447.736 | 447.72 | -0.016 | 0.000256 |
| 100382 | 1351859 | 3969095 | 450.896 | 450.88 | -0.016 | 0.000256 |
| 101579 | 1351528 | 3969073 | 451.306 | 451.29 | -0.016 | 0.000256 |
| 103429 | 1379602 | 3971951 | 452.856 | 452.84 | -0.016 | 0.000256 |
| 106775 | 1421772 | 3970332 | 472.056 | 472.04 | -0.016 | 0.000256 |
| 105731 | 1424656 | 3941820 | 486.236 | 486.22 | -0.016 | 0.000256 |
| 105629 | 1429175 | 3938979 | 490.386 | 490.37 | -0.016 | 0.000256 |
| 105411 | 1429030 | 3930681 | 496.946 | 496.93 | -0.016 | 0.000256 |
| 101192 | 1337541 | 3951611 | 432.635 | 432.62 | -0.015 | 0.000225 |
| 100805 | 1340939 | 3954137 | 432.655 | 432.64 | -0.015 | 0.000225 |
| 100714 | 1343526 | 3957202 | 432.895 | 432.88 | -0.015 | 0.000225 |
| 100099 | 1358168 | 3962062 | 436.265 | 436.25 | -0.015 | 0.000225 |
| 100551 | 1346826 | 3963147 | 438.425 | 438.41 | -0.015 | 0.000225 |
| 101751 | 1358371 | 3970266 | 440.195 | 440.18 | -0.015 | 0.000225 |
| 103621 | 1375008 | 3965541 | 447.215 | 447.2  | -0.015 | 0.000225 |
| 104173 | 1372481 | 3947363 | 450.435 | 450.42 | -0.015 | 0.000225 |
| 103501 | 1378412 | 3969712 | 451.295 | 451.28 | -0.015 | 0.000225 |
| 103425 | 1379603 | 3972036 | 453.425 | 453.41 | -0.015 | 0.000225 |
| 107545 | 1397927 | 3959482 | 457.425 | 457.41 | -0.015 | 0.000225 |
| 107562 | 1397155 | 3959020 | 459.265 | 459.25 | -0.015 | 0.000225 |
| 105901 | 1421991 | 3950224 | 474.875 | 474.86 | -0.015 | 0.000225 |
| 106701 | 1421842 | 3974026 | 479.225 | 479.21 | -0.015 | 0.000225 |
| 105531 | 1429729 | 3934836 | 493.515 | 493.5  | -0.015 | 0.000225 |
| 101098 | 1334696 | 3948453 | 553.295 | 553.28 | -0.015 | 0.000225 |
| 101243 | 1340629 | 3953762 | 432.904 | 432.89 | -0.014 | 0.000196 |
| 100083 | 1358150 | 3961381 | 435.344 | 435.33 | -0.014 | 0.000196 |
| 100639 | 1345098 | 3959999 | 436.904 | 436.89 | -0.014 | 0.000196 |
| 101387 | 1345710 | 3961050 | 436.914 | 436.9  | -0.014 | 0.000196 |
| 103569 | 1376258 | 3968216 | 446.284 | 446.27 | -0.014 | 0.000196 |
| 103904 | 1373788 | 3953289 | 446.894 | 446.88 | -0.014 | 0.000196 |
| 104392 | 1373725 | 3950708 | 450.224 | 450.21 | -0.014 | 0.000196 |
| 103502 | 1378378 | 3969689 | 451.344 | 451.33 | -0.014 | 0.000196 |
| 100433 | 1349326 | 3967706 | 459.474 | 459.46 | -0.014 | 0.000196 |
| 106073 | 1420756 | 3958482 | 473.174 | 473.16 | -0.014 | 0.000196 |
| 106985 | 1420691 | 3955807 | 475.384 | 475.37 | -0.014 | 0.000196 |
| 105853 | 1422993 | 3947778 | 477.444 | 477.43 | -0.014 | 0.000196 |
| 106686 | 1421857 | 3974842 | 484.224 | 484.21 | -0.014 | 0.000196 |
| 101163 | 1336542 | 3950744 | 432.723 | 432.71 | -0.013 | 0.000169 |
| 101302 | 1343840 | 3957717 | 434.523 | 434.51 | -0.013 | 0.000169 |
| 104482 | 1373797 | 3953145 | 447.143 | 447.13 | -0.013 | 0.000169 |
| 101125 | 1335296 | 3949459 | 452.233 | 452.22 | -0.013 | 0.000169 |
| 103993 | 1373695 | 3950446 | 453.613 | 453.6  | -0.013 | 0.000169 |
| 100490 | 1348117 | 3965539 | 455.613 | 455.6  | -0.013 | 0.000169 |
| 101522 | 1349128 | 3967272 | 460.433 | 460.42 | -0.013 | 0.000169 |
| 106209 | 1421622 | 3968496 | 464.753 | 464.74 | -0.013 | 0.000169 |
| 106146 | 1420902 | 3965052 | 470.453 | 470.44 | -0.013 | 0.000169 |
| 106732 | 1421812 | 3972439 | 472.733 | 472.72 | -0.013 | 0.000169 |

|        |         |         |         |        |        |          |
|--------|---------|---------|---------|--------|--------|----------|
| 106949 | 1420722 | 3957459 | 474.933 | 474.92 | -0.013 | 0.000169 |
| 105670 | 1427700 | 3940258 | 488.043 | 488.03 | -0.013 | 0.000169 |
| 105487 | 1429249 | 3933283 | 494.463 | 494.45 | -0.013 | 0.000169 |
| 101087 | 1334413 | 3947923 | 573.353 | 573.34 | -0.013 | 0.000169 |
| 100715 | 1343502 | 3957164 | 432.832 | 432.82 | -0.012 | 0.000144 |
| 100706 | 1343705 | 3957504 | 433.722 | 433.71 | -0.012 | 0.000144 |
| 101407 | 1346149 | 3961834 | 436.842 | 436.83 | -0.012 | 0.000144 |
| 101412 | 1346279 | 3962065 | 436.852 | 436.84 | -0.012 | 0.000144 |
| 101748 | 1358368 | 3970144 | 439.272 | 439.26 | -0.012 | 0.000144 |
| 101448 | 1347226 | 3963888 | 440.372 | 440.36 | -0.012 | 0.000144 |
| 103690 | 1374443 | 3962842 | 448.492 | 448.48 | -0.012 | 0.000144 |
| 107462 | 1401933 | 3961212 | 460.372 | 460.36 | -0.012 | 0.000144 |
| 106860 | 1420878 | 3964605 | 470.473 | 470.46 | -0.012 | 0.000144 |
| 105896 | 1422067 | 3949978 | 473.772 | 473.76 | -0.012 | 0.000144 |
| 105951 | 1421210 | 3952709 | 474.552 | 474.54 | -0.012 | 0.000144 |
| 105859 | 1422814 | 3948037 | 478.162 | 478.15 | -0.012 | 0.000144 |
| 105486 | 1429244 | 3933265 | 494.582 | 494.57 | -0.012 | 0.000144 |
| 101281 | 1342360 | 3955743 | 433.051 | 433.04 | -0.011 | 0.000121 |
| 100126 | 1358204 | 3963191 | 435.381 | 435.37 | -0.011 | 0.000121 |
| 100106 | 1358176 | 3962373 | 436.731 | 436.72 | -0.011 | 0.000121 |
| 101411 | 1346257 | 3962027 | 436.811 | 436.8  | -0.011 | 0.000121 |
| 100531 | 1347231 | 3963954 | 440.771 | 440.76 | -0.011 | 0.000121 |
| 103933 | 1373749 | 3952080 | 445.921 | 445.91 | -0.011 | 0.000121 |
| 104410 | 1373738 | 3951110 | 446.291 | 446.28 | -0.011 | 0.000121 |
| 106135 | 1420891 | 3964560 | 470.361 | 470.35 | -0.011 | 0.000121 |
| 106863 | 1420874 | 3964444 | 470.621 | 470.61 | -0.011 | 0.000121 |
| 106130 | 1420886 | 3964347 | 470.731 | 470.72 | -0.011 | 0.000121 |
| 106084 | 1420768 | 3959079 | 473.701 | 473.69 | -0.011 | 0.000121 |
| 106292 | 1421830 | 3972528 | 473.721 | 473.71 | -0.011 | 0.000121 |
| 105849 | 1423122 | 3947607 | 476.931 | 476.92 | -0.011 | 0.000121 |
| 105468 | 1429075 | 3932632 | 495.911 | 495.9  | -0.011 | 0.000121 |
| 105412 | 1429015 | 3930713 | 496.941 | 496.93 | -0.011 | 0.000121 |
| 101031 | 1333963 | 3947655 | 556.831 | 556.82 | -0.011 | 0.000121 |
| 101015 | 1334522 | 3948061 | 573.101 | 573.09 | -0.011 | 0.000121 |
| 101198 | 1337768 | 3951728 | 432.54  | 432.53 | -0.01  | 0.0001   |
| 101255 | 1341573 | 3954841 | 432.88  | 432.87 | -0.01  | 0.0001   |
| 101335 | 1344527 | 3958944 | 436.71  | 436.7  | -0.01  | 0.0001   |
| 103731 | 1374033 | 3960989 | 445.89  | 445.88 | -0.01  | 0.0001   |
| 101461 | 1347584 | 3964508 | 450.72  | 450.71 | -0.01  | 0.0001   |
| 101528 | 1349279 | 3967541 | 459.93  | 459.92 | -0.01  | 0.0001   |
| 106765 | 1421781 | 3970819 | 471.02  | 471.01 | -0.01  | 0.0001   |
| 106768 | 1421779 | 3970675 | 471.62  | 471.61 | -0.01  | 0.0001   |
| 106040 | 1420728 | 3956800 | 474.95  | 474.94 | -0.01  | 0.0001   |
| 106308 | 1421846 | 3973375 | 476.45  | 476.44 | -0.01  | 0.0001   |
| 105617 | 1429536 | 3938664 | 490.11  | 490.1  | -0.01  | 0.0001   |
| 105536 | 1429845 | 3935067 | 494.19  | 494.18 | -0.01  | 0.0001   |
| 105408 | 1429091 | 3930543 | 496.89  | 496.88 | -0.01  | 0.0001   |
| 101168 | 1336688 | 3950899 | 432.639 | 432.63 | -0.009 | 0.000081 |
| 101251 | 1341271 | 3954494 | 433.039 | 433.03 | -0.009 | 0.000081 |
| 100178 | 1358267 | 3965801 | 436.839 | 436.83 | -0.009 | 0.000081 |
| 100224 | 1358316 | 3967800 | 436.949 | 436.94 | -0.009 | 0.000081 |
| 101791 | 1358372 | 3971907 | 441.899 | 441.89 | -0.009 | 0.000081 |

|        |         |         |         |        |        |          |
|--------|---------|---------|---------|--------|--------|----------|
| 101793 | 1358375 | 3971997 | 442.069 | 442.06 | -0.009 | 0.000081 |
| 103592 | 1375664 | 3967442 | 442.959 | 442.95 | -0.009 | 0.000081 |
| 103773 | 1373591 | 3959682 | 443.949 | 443.94 | -0.009 | 0.000081 |
| 103998 | 1373690 | 3950341 | 453.529 | 453.52 | -0.009 | 0.000081 |
| 107656 | 1395529 | 3954435 | 458.029 | 458.02 | -0.009 | 0.000081 |
| 107452 | 1402499 | 3961399 | 461.439 | 461.43 | -0.009 | 0.000081 |
| 106842 | 1420895 | 3965504 | 470.459 | 470.45 | -0.009 | 0.000081 |
| 106167 | 1420918 | 3965976 | 472.639 | 472.63 | -0.009 | 0.000081 |
| 101154 | 1336274 | 3950468 | 432.958 | 432.95 | -0.008 | 0.000064 |
| 101295 | 1343569 | 3957247 | 433.178 | 433.17 | -0.008 | 0.000064 |
| 100042 | 1357386 | 3959858 | 436.898 | 436.89 | -0.008 | 0.000064 |
| 100180 | 1358269 | 3965888 | 436.968 | 436.96 | -0.008 | 0.000064 |
| 100186 | 1358275 | 3966143 | 439.398 | 439.39 | -0.008 | 0.000064 |
| 100359 | 1352875 | 3969064 | 445.008 | 445    | -0.008 | 0.000064 |
| 104404 | 1373735 | 3950984 | 446.298 | 446.29 | -0.008 | 0.000064 |
| 103676 | 1374738 | 3963368 | 448.098 | 448.09 | -0.008 | 0.000064 |
| 103469 | 1379430 | 3970721 | 450.708 | 450.7  | -0.008 | 0.000064 |
| 105952 | 1421184 | 3952790 | 474.958 | 474.95 | -0.008 | 0.000064 |
| 107001 | 1420637 | 3955037 | 475.348 | 475.34 | -0.008 | 0.000064 |
| 105885 | 1422244 | 3949411 | 475.668 | 475.66 | -0.008 | 0.000064 |
| 106698 | 1421845 | 3974199 | 480.178 | 480.17 | -0.008 | 0.000064 |
| 100717 | 1343453 | 3957089 | 432.787 | 432.78 | -0.007 | 0.000049 |
| 100799 | 1341111 | 3954334 | 432.907 | 432.9  | -0.007 | 0.000049 |
| 101266 | 1341918 | 3955237 | 432.917 | 432.91 | -0.007 | 0.000049 |
| 100138 | 1358212 | 3963532 | 434.897 | 434.89 | -0.007 | 0.000049 |
| 100048 | 1357572 | 3959951 | 436.477 | 436.47 | -0.007 | 0.000049 |
| 101350 | 1344852 | 3959527 | 437.147 | 437.14 | -0.007 | 0.000049 |
| 100526 | 1347344 | 3964154 | 442.567 | 442.56 | -0.007 | 0.000049 |
| 103806 | 1373785 | 3958346 | 444.817 | 444.81 | -0.007 | 0.000049 |
| 103951 | 1373735 | 3951501 | 446.457 | 446.45 | -0.007 | 0.000049 |
| 103694 | 1374350 | 3962678 | 449.697 | 449.69 | -0.007 | 0.000049 |
| 104159 | 1372606 | 3947564 | 450.327 | 450.32 | -0.007 | 0.000049 |
| 101539 | 1349478 | 3967893 | 459.207 | 459.2  | -0.007 | 0.000049 |
| 100418 | 1349677 | 3968289 | 459.377 | 459.37 | -0.007 | 0.000049 |
| 107463 | 1401892 | 3961197 | 460.367 | 460.36 | -0.007 | 0.000049 |
| 106099 | 1420782 | 3959798 | 474.827 | 474.82 | -0.007 | 0.000049 |
| 105939 | 1421405 | 3952108 | 475.357 | 475.35 | -0.007 | 0.000049 |
| 105746 | 1424047 | 3942422 | 485.567 | 485.56 | -0.007 | 0.000049 |
| 103353 | 1379903 | 3974955 | 499.417 | 499.41 | -0.007 | 0.000049 |
| 5533   | 1388818 | 4005659 | 740.687 | 740.68 | -0.007 | 0.000049 |
| 100943 | 1336222 | 3950436 | 432.856 | 432.85 | -0.006 | 0.000036 |
| 100748 | 1342580 | 3956014 | 433.096 | 433.09 | -0.006 | 0.000036 |
| 100213 | 1358306 | 3967314 | 435.416 | 435.41 | -0.006 | 0.000036 |
| 100617 | 1345511 | 3960733 | 436.916 | 436.91 | -0.006 | 0.000036 |
| 104451 | 1373759 | 3952055 | 446.066 | 446.06 | -0.006 | 0.000036 |
| 104399 | 1373731 | 3950868 | 446.666 | 446.66 | -0.006 | 0.000036 |
| 101812 | 1358390 | 3972842 | 447.456 | 447.45 | -0.006 | 0.000036 |
| 103533 | 1377477 | 3969091 | 447.716 | 447.71 | -0.006 | 0.000036 |
| 103523 | 1377804 | 3969303 | 447.846 | 447.84 | -0.006 | 0.000036 |
| 103687 | 1374513 | 3962965 | 448.616 | 448.61 | -0.006 | 0.000036 |
| 104220 | 1372695 | 3947697 | 450.956 | 450.95 | -0.006 | 0.000036 |
| 103440 | 1379601 | 3971804 | 451.656 | 451.65 | -0.006 | 0.000036 |

|        |         |         |         |        |        |          |
|--------|---------|---------|---------|--------|--------|----------|
| 103486 | 1378964 | 3970096 | 452.216 | 452.21 | -0.006 | 0.000036 |
| 104085 | 1373286 | 3948759 | 452.266 | 452.26 | -0.006 | 0.000036 |
| 101549 | 1349695 | 3968239 | 457.256 | 457.25 | -0.006 | 0.000036 |
| 107503 | 1400034 | 3960444 | 459.346 | 459.34 | -0.006 | 0.000036 |
| 106017 | 1420703 | 3955632 | 475.166 | 475.16 | -0.006 | 0.000036 |
| 105940 | 1421380 | 3952185 | 475.376 | 475.37 | -0.006 | 0.000036 |
| 105960 | 1421018 | 3953184 | 475.416 | 475.41 | -0.006 | 0.000036 |
| 101118 | 1335081 | 3949235 | 477.506 | 477.5  | -0.006 | 0.000036 |
| 101064 | 1333563 | 3947408 | 542.266 | 542.26 | -0.006 | 0.000036 |
| 100915 | 1337090 | 3951316 | 433.455 | 433.45 | -0.005 | 0.000025 |
| 100229 | 1358322 | 3968019 | 438.096 | 438.09 | -0.005 | 0.000025 |
| 104391 | 1373724 | 3950686 | 451.285 | 451.28 | -0.005 | 0.000025 |
| 101479 | 1348043 | 3965328 | 454.595 | 454.59 | -0.005 | 0.000025 |
| 101124 | 1335266 | 3949428 | 455.275 | 455.27 | -0.005 | 0.000025 |
| 101557 | 1349916 | 3968489 | 456.165 | 456.16 | -0.005 | 0.000025 |
| 106125 | 1420880 | 3964132 | 471.485 | 471.48 | -0.005 | 0.000025 |
| 106997 | 1420665 | 3955224 | 475.255 | 475.25 | -0.005 | 0.000025 |
| 105919 | 1421712 | 3951113 | 477.555 | 477.55 | -0.005 | 0.000025 |
| 101846 | 1357655 | 3974161 | 478.925 | 478.92 | -0.005 | 0.000025 |
| 106334 | 1421875 | 3974764 | 483.105 | 483.1  | -0.005 | 0.000025 |
| 101049 | 1333151 | 3947146 | 550.665 | 550.66 | -0.005 | 0.000025 |
| 101205 | 1338037 | 3951849 | 432.374 | 432.37 | -0.004 | 0.000016 |
| 100747 | 1342610 | 3956048 | 433.054 | 433.05 | -0.004 | 0.000016 |
| 100090 | 1358158 | 3961682 | 435.034 | 435.03 | -0.004 | 0.000016 |
| 100232 | 1358327 | 3968149 | 438.134 | 438.13 | -0.004 | 0.000016 |
| 101756 | 1358377 | 3970472 | 440.014 | 440.01 | -0.004 | 0.000016 |
| 103935 | 1373747 | 3952010 | 446.074 | 446.07 | -0.004 | 0.000016 |
| 104303 | 1373415 | 3948967 | 452.804 | 452.8  | -0.004 | 0.000016 |
| 104004 | 1373686 | 3950223 | 453.504 | 453.5  | -0.004 | 0.000016 |
| 104383 | 1373718 | 3950529 | 453.744 | 453.74 | -0.004 | 0.000016 |
| 107528 | 1398781 | 3959870 | 458.064 | 458.06 | -0.004 | 0.000016 |
| 105709 | 1425879 | 3941394 | 485.714 | 485.71 | -0.004 | 0.000016 |
| 105654 | 1428305 | 3939732 | 488.944 | 488.94 | -0.004 | 0.000016 |
| 100101 | 1358170 | 3962151 | 436.583 | 436.58 | -0.003 | 0.000009 |
| 100248 | 1358341 | 3968736 | 437.303 | 437.3  | -0.003 | 0.000009 |
| 103531 | 1377524 | 3969123 | 447.763 | 447.76 | -0.003 | 0.000009 |
| 101572 | 1351246 | 3969070 | 451.273 | 451.27 | -0.003 | 0.000009 |
| 104191 | 1372465 | 3947310 | 451.483 | 451.48 | -0.003 | 0.000009 |
| 104078 | 1373353 | 3948878 | 452.373 | 452.37 | -0.003 | 0.000009 |
| 103990 | 1373701 | 3950507 | 453.763 | 453.76 | -0.003 | 0.000009 |
| 106800 | 1421119 | 3967634 | 470.943 | 470.94 | -0.003 | 0.000009 |
| 106802 | 1421086 | 3967563 | 471.023 | 471.02 | -0.003 | 0.000009 |
| 106828 | 1420911 | 3966496 | 472.503 | 472.5  | -0.003 | 0.000009 |
| 105803 | 1424068 | 3945594 | 476.393 | 476.39 | -0.003 | 0.000009 |
| 105661 | 1428029 | 3939971 | 488.503 | 488.5  | -0.003 | 0.000009 |
| 105495 | 1429294 | 3933516 | 493.273 | 493.27 | -0.003 | 0.000009 |
| 101097 | 1334685 | 3948413 | 556.873 | 556.87 | -0.003 | 0.000009 |
| 101252 | 1341361 | 3954598 | 432.752 | 432.75 | -0.002 | 0.000004 |
| 101253 | 1341392 | 3954634 | 432.782 | 432.78 | -0.002 | 0.000004 |
| 100743 | 1342728 | 3956183 | 433.012 | 433.01 | -0.002 | 0.000004 |
| 100737 | 1342904 | 3956387 | 433.032 | 433.03 | -0.002 | 0.000004 |
| 101270 | 1342025 | 3955359 | 433.062 | 433.06 | -0.002 | 0.000004 |



|        |         |         |         |        |        |          |
|--------|---------|---------|---------|--------|--------|----------|
| 101311 | 1344021 | 3958043 | 435.582 | 435.58 | -0.002 | 0.000004 |
| 100100 | 1358169 | 3962106 | 436.492 | 436.49 | -0.002 | 0.000004 |
| 100591 | 1346054 | 3961699 | 436.572 | 436.57 | -0.002 | 0.000004 |
| 100174 | 1358262 | 3965630 | 437.052 | 437.05 | -0.002 | 0.000004 |
| 101445 | 1347161 | 3963767 | 440.232 | 440.23 | -0.002 | 0.000004 |
| 103940 | 1373742 | 3951839 | 446.072 | 446.07 | -0.002 | 0.000004 |
| 104449 | 1373757 | 3951999 | 446.122 | 446.12 | -0.002 | 0.000004 |
| 103886 | 1373807 | 3954056 | 447.082 | 447.08 | -0.002 | 0.000004 |
| 104467 | 1373775 | 3952571 | 447.632 | 447.63 | -0.002 | 0.000004 |
| 103979 | 1373717 | 3950733 | 449.152 | 449.15 | -0.002 | 0.000004 |
| 103604 | 1375366 | 3966991 | 451.832 | 451.83 | -0.002 | 0.000004 |
| 100406 | 1350878 | 3969061 | 454.712 | 454.71 | -0.002 | 0.000004 |
| 106247 | 1421811 | 3970533 | 471.842 | 471.84 | -0.002 | 0.000004 |
| 101261 | 1341778 | 3955076 | 432.921 | 432.92 | -0.001 | 0.000001 |
| 101271 | 1342052 | 3955389 | 433.091 | 433.09 | -0.001 | 0.000001 |
| 101404 | 1346086 | 3961721 | 436.601 | 436.6  | -0.001 | 0.000001 |
| 100592 | 1346033 | 3961660 | 436.691 | 436.69 | -0.001 | 0.000001 |
| 100566 | 1346630 | 3962765 | 436.851 | 436.85 | -0.001 | 0.000001 |
| 100641 | 1345059 | 3959926 | 436.861 | 436.86 | -0.001 | 0.000001 |
| 101376 | 1345495 | 3960666 | 436.861 | 436.86 | -0.001 | 0.000001 |
| 100065 | 1358116 | 3960591 | 436.921 | 436.92 | -0.001 | 0.000001 |
| 103764 | 1373662 | 3960058 | 443.851 | 443.85 | -0.001 | 0.000001 |
| 103939 | 1373743 | 3951873 | 445.931 | 445.93 | -0.001 | 0.000001 |
| 104222 | 1372709 | 3947722 | 451.021 | 451.02 | -0.001 | 0.000001 |
| 101824 | 1358256 | 3973460 | 453.941 | 453.94 | -0.001 | 0.000001 |
| 101545 | 1349598 | 3968100 | 457.801 | 457.8  | -0.001 | 0.000001 |
| 107504 | 1399993 | 3960425 | 459.261 | 459.26 | -0.001 | 0.000001 |
| 107453 | 1402409 | 3961376 | 461.651 | 461.65 | -0.001 | 0.000001 |
| 106175 | 1420931 | 3966728 | 472.311 | 472.31 | -0.001 | 0.000001 |
| 106033 | 1420719 | 3956449 | 474.981 | 474.98 | -0.001 | 0.000001 |
| 106688 | 1421854 | 3974713 | 482.571 | 482.57 | -0.001 | 0.000001 |
| 5542   | 1389155 | 4006000 | 744.941 | 744.94 | -0.001 | 0.000001 |
| 5543   | 1389191 | 4006037 | 745.551 | 745.55 | -0.001 | 0.000001 |
| 100880 | 1338380 | 3952017 | 432.45  | 432.45 | 0      | 0        |
| 101238 | 1340441 | 3953546 | 432.91  | 432.91 | 0      | 0        |
| 100119 | 1358195 | 3962930 | 435.81  | 435.81 | 0      | 0        |
| 101333 | 1344484 | 3958869 | 436.85  | 436.85 | 0      | 0        |
| 100175 | 1358263 | 3965672 | 436.86  | 436.86 | 0      | 0        |
| 100354 | 1353090 | 3969060 | 444.43  | 444.43 | 0      | 0        |
| 103751 | 1373981 | 3960250 | 444.51  | 444.51 | 0      | 0        |
| 103978 | 1373717 | 3950754 | 448.42  | 448.42 | 0      | 0        |
| 104141 | 1372766 | 3947843 | 451.22  | 451.22 | 0      | 0        |
| 103982 | 1373714 | 3950673 | 451.68  | 451.68 | 0      | 0        |
| 104374 | 1373708 | 3950353 | 453.51  | 453.51 | 0      | 0        |
| 107613 | 1396175 | 3956627 | 456.25  | 456.25 | 0      | 0        |
| 107518 | 1399279 | 3960095 | 458.75  | 458.75 | 0      | 0        |
| 106144 | 1420900 | 3964950 | 470.461 | 470.46 | 0      | 0        |
| 106064 | 1420749 | 3958015 | 474.49  | 474.49 | 0      | 0        |
| 107010 | 1420556 | 3954717 | 474.94  | 474.94 | 0      | 0        |
| 101020 | 1334376 | 3947907 | 572.18  | 572.18 | 0      | 0        |
| 101258 | 1341691 | 3954976 | 433.029 | 433.03 | 0.001  | 0.000001 |
| 100758 | 1342277 | 3955668 | 433.079 | 433.08 | 0.001  | 0.000001 |

|        |         |         |         |        |       |          |
|--------|---------|---------|---------|--------|-------|----------|
| 100764 | 1342096 | 3955460 | 433.279 | 433.28 | 0.001 | 0.000001 |
| 100700 | 1343832 | 3957730 | 434.449 | 434.45 | 0.001 | 0.000001 |
| 100959 | 1335767 | 3949964 | 434.789 | 434.79 | 0.001 | 0.000001 |
| 100057 | 1357934 | 3960210 | 436.699 | 436.7  | 0.001 | 0.000001 |
| 100538 | 1347087 | 3963677 | 440.219 | 440.22 | 0.001 | 0.000001 |
| 100521 | 1347455 | 3964353 | 446.729 | 446.73 | 0.001 | 0.000001 |
| 103711 | 1374068 | 3961899 | 449.109 | 449.11 | 0.001 | 0.000001 |
| 103443 | 1379601 | 3971731 | 450.979 | 450.98 | 0.001 | 0.000001 |
| 107559 | 1397290 | 3959134 | 458.919 | 458.92 | 0.001 | 0.000001 |
| 106129 | 1420885 | 3964311 | 470.949 | 470.95 | 0.001 | 0.000001 |
| 106892 | 1420771 | 3960133 | 474.729 | 474.73 | 0.001 | 0.000001 |
| 105984 | 1420306 | 3953984 | 475.909 | 475.91 | 0.001 | 0.000001 |
| 106706 | 1421838 | 3973771 | 478.319 | 478.32 | 0.001 | 0.000001 |
| 105679 | 1427388 | 3940525 | 487.659 | 487.66 | 0.001 | 0.000001 |
| 101055 | 1333293 | 3947250 | 543.419 | 543.42 | 0.001 | 0.000001 |
| 101028 | 1334074 | 3947718 | 560.669 | 560.67 | 0.001 | 0.000001 |
| 100735 | 1342963 | 3956454 | 433.028 | 433.03 | 0.002 | 0.000004 |
| 100046 | 1357499 | 3959915 | 436.748 | 436.75 | 0.002 | 0.000004 |
| 100628 | 1345307 | 3960375 | 436.918 | 436.92 | 0.002 | 0.000004 |
| 101353 | 1344968 | 3959733 | 437.007 | 437.01 | 0.002 | 0.000004 |
| 101373 | 1345436 | 3960566 | 437.008 | 437.01 | 0.002 | 0.000004 |
| 100183 | 1358272 | 3966018 | 437.878 | 437.88 | 0.002 | 0.000004 |
| 101585 | 1351783 | 3969068 | 450.788 | 450.79 | 0.002 | 0.000004 |
| 103394 | 1379602 | 3973124 | 462.318 | 462.32 | 0.002 | 0.000004 |
| 105986 | 1420294 | 3954018 | 475.748 | 475.75 | 0.002 | 0.000004 |
| 100784 | 1341529 | 3954812 | 432.807 | 432.81 | 0.003 | 0.000009 |
| 100776 | 1341753 | 3955068 | 433.107 | 433.11 | 0.003 | 0.000009 |
| 100103 | 1358172 | 3962240 | 436.667 | 436.67 | 0.003 | 0.000009 |
| 100600 | 1345860 | 3961355 | 436.777 | 436.78 | 0.003 | 0.000009 |
| 100063 | 1358091 | 3960495 | 436.867 | 436.87 | 0.003 | 0.000009 |
| 100654 | 1344777 | 3959420 | 436.947 | 436.95 | 0.003 | 0.000009 |
| 101760 | 1358382 | 3970642 | 439.477 | 439.48 | 0.003 | 0.000009 |
| 103695 | 1374327 | 3962636 | 450.067 | 450.07 | 0.003 | 0.000009 |
| 104255 | 1372980 | 3948197 | 451.717 | 451.72 | 0.003 | 0.000009 |
| 101825 | 1358238 | 3973502 | 454.427 | 454.43 | 0.003 | 0.000009 |
| 101505 | 1348705 | 3966512 | 458.217 | 458.22 | 0.003 | 0.000009 |
| 107642 | 1395748 | 3955179 | 458.827 | 458.83 | 0.003 | 0.000009 |
| 106036 | 1420723 | 3956608 | 474.867 | 474.87 | 0.003 | 0.000009 |
| 105987 | 1420295 | 3954038 | 475.357 | 475.36 | 0.003 | 0.000009 |
| 106978 | 1420697 | 3956158 | 475.537 | 475.54 | 0.003 | 0.000009 |
| 105409 | 1429061 | 3930613 | 496.897 | 496.9  | 0.003 | 0.000009 |
| 101018 | 1334442 | 3947966 | 573.417 | 573.42 | 0.003 | 0.000009 |
| 101274 | 1342132 | 3955482 | 433.026 | 433.03 | 0.004 | 0.000016 |
| 100147 | 1358216 | 3963861 | 434.906 | 434.91 | 0.004 | 0.000016 |
| 101349 | 1344829 | 3959487 | 437.106 | 437.11 | 0.004 | 0.000016 |
| 101758 | 1358380 | 3970556 | 439.806 | 439.81 | 0.004 | 0.000016 |
| 103911 | 1373779 | 3953015 | 447.366 | 447.37 | 0.004 | 0.000016 |
| 101486 | 1348233 | 3965668 | 455.806 | 455.81 | 0.004 | 0.000016 |
| 101558 | 1349945 | 3968517 | 456.096 | 456.1  | 0.004 | 0.000016 |
| 100463 | 1348680 | 3966546 | 458.346 | 458.35 | 0.004 | 0.000016 |
| 107566 | 1397008 | 3958871 | 459.646 | 459.65 | 0.004 | 0.000016 |
| 106159 | 1420912 | 3965621 | 470.926 | 470.93 | 0.004 | 0.000016 |

|        |         |         |         |        |       |          |
|--------|---------|---------|---------|--------|-------|----------|
| 106822 | 1420914 | 3966755 | 472.276 | 472.28 | 0.004 | 0.000016 |
| 101119 | 1335113 | 3949268 | 473.656 | 473.66 | 0.004 | 0.000016 |
| 105695 | 1426660 | 3941078 | 488.066 | 488.07 | 0.004 | 0.000016 |
| 101215 | 1338441 | 3952030 | 432.475 | 432.48 | 0.005 | 0.000025 |
| 101254 | 1341483 | 3954738 | 432.815 | 432.82 | 0.005 | 0.000025 |
| 100914 | 1337124 | 3951344 | 433.385 | 433.39 | 0.005 | 0.000025 |
| 100967 | 1335525 | 3949712 | 437.825 | 437.83 | 0.005 | 0.000025 |
| 103655 | 1374932 | 3964127 | 445.575 | 445.58 | 0.005 | 0.000025 |
| 103729 | 1374035 | 3961073 | 446.055 | 446.06 | 0.005 | 0.000025 |
| 101466 | 1347710 | 3964733 | 453.125 | 453.13 | 0.005 | 0.000025 |
| 103991 | 1373699 | 3950486 | 453.715 | 453.72 | 0.005 | 0.000025 |
| 107632 | 1395908 | 3955725 | 456.955 | 456.96 | 0.005 | 0.000025 |
| 100447 | 1349024 | 3967162 | 460.125 | 460.13 | 0.005 | 0.000025 |
| 106149 | 1420905 | 3965192 | 470.485 | 470.49 | 0.005 | 0.000025 |
| 106714 | 1421830 | 3973360 | 476.315 | 476.32 | 0.005 | 0.000025 |
| 105640 | 1428805 | 3939298 | 489.885 | 489.89 | 0.005 | 0.000025 |
| 101241 | 1340522 | 3953638 | 432.844 | 432.85 | 0.006 | 0.000036 |
| 100792 | 1341308 | 3954559 | 432.924 | 432.93 | 0.006 | 0.000036 |
| 100144 | 1358213 | 3963751 | 434.794 | 434.8  | 0.006 | 0.000036 |
| 103578 | 1376003 | 3967890 | 443.964 | 443.97 | 0.006 | 0.000036 |
| 103643 | 1374958 | 3964595 | 445.184 | 445.19 | 0.006 | 0.000036 |
| 104401 | 1373732 | 3950914 | 446.454 | 446.46 | 0.006 | 0.000036 |
| 103954 | 1373735 | 3951418 | 446.654 | 446.66 | 0.006 | 0.000036 |
| 104396 | 1373729 | 3950800 | 447.374 | 447.38 | 0.006 | 0.000036 |
| 103602 | 1375412 | 3967074 | 449.904 | 449.91 | 0.006 | 0.000036 |
| 103617 | 1375019 | 3965737 | 450.824 | 450.83 | 0.006 | 0.000036 |
| 104193 | 1372478 | 3947332 | 451.134 | 451.14 | 0.006 | 0.000036 |
| 101474 | 1347914 | 3965099 | 454.084 | 454.09 | 0.006 | 0.000036 |
| 101482 | 1348129 | 3965482 | 455.244 | 455.25 | 0.006 | 0.000036 |
| 107533 | 1398497 | 3959746 | 457.814 | 457.82 | 0.006 | 0.000036 |
| 100416 | 1349733 | 3968359 | 459.024 | 459.03 | 0.006 | 0.000036 |
| 107474 | 1401366 | 3960995 | 460.244 | 460.25 | 0.006 | 0.000036 |
| 106854 | 1420885 | 3964890 | 470.374 | 470.38 | 0.006 | 0.000036 |
| 106238 | 1421791 | 3970264 | 472.164 | 472.17 | 0.006 | 0.000036 |
| 106933 | 1420736 | 3958193 | 474.204 | 474.21 | 0.006 | 0.000036 |
| 106059 | 1420744 | 3957725 | 474.684 | 474.69 | 0.006 | 0.000036 |
| 106940 | 1420731 | 3957857 | 474.734 | 474.74 | 0.006 | 0.000036 |
| 105927 | 1421582 | 3951519 | 476.934 | 476.94 | 0.006 | 0.000036 |
| 105455 | 1429151 | 3932083 | 494.884 | 494.89 | 0.006 | 0.000036 |
| 100741 | 1342787 | 3956251 | 433.033 | 433.04 | 0.007 | 0.000049 |
| 100071 | 1358138 | 3960859 | 436.453 | 436.46 | 0.007 | 0.000049 |
| 100603 | 1345796 | 3961239 | 436.823 | 436.83 | 0.007 | 0.000049 |
| 101552 | 1349774 | 3968336 | 456.803 | 456.81 | 0.007 | 0.000049 |
| 101120 | 1335144 | 3949300 | 469.743 | 469.75 | 0.007 | 0.000049 |
| 101085 | 1334348 | 3947869 | 571.453 | 571.46 | 0.007 | 0.000049 |
| 101174 | 1336869 | 3951085 | 433.002 | 433.01 | 0.008 | 0.000064 |
| 100092 | 1358160 | 3961765 | 435.302 | 435.31 | 0.008 | 0.000064 |
| 100038 | 1357286 | 3959808 | 436.272 | 436.28 | 0.008 | 0.000064 |
| 101382 | 1345599 | 3960849 | 436.862 | 436.87 | 0.008 | 0.000064 |
| 100968 | 1335494 | 3949680 | 438.712 | 438.72 | 0.008 | 0.000064 |
| 103575 | 1376085 | 3967998 | 444.402 | 444.41 | 0.008 | 0.000064 |
| 104438 | 1373750 | 3951693 | 446.672 | 446.68 | 0.008 | 0.000064 |

|        |         |         |         |        |       |          |
|--------|---------|---------|---------|--------|-------|----------|
| 104487 | 1373805 | 3953419 | 447.462 | 447.47 | 0.008 | 0.000064 |
| 100396 | 1351272 | 3969116 | 453.402 | 453.41 | 0.008 | 0.000064 |
| 101546 | 1349621 | 3968136 | 457.782 | 457.79 | 0.008 | 0.000064 |
| 107596 | 1396415 | 3957462 | 458.182 | 458.19 | 0.008 | 0.000064 |
| 106197 | 1421329 | 3967963 | 466.732 | 466.74 | 0.008 | 0.000064 |
| 106795 | 1421211 | 3967802 | 469.672 | 469.68 | 0.008 | 0.000064 |
| 106929 | 1420740 | 3958378 | 473.552 | 473.56 | 0.008 | 0.000064 |
| 105996 | 1420544 | 3954620 | 475.702 | 475.71 | 0.008 | 0.000064 |
| 105710 | 1425833 | 3941408 | 485.642 | 485.65 | 0.008 | 0.000064 |
| 105720 | 1425219 | 3941592 | 485.692 | 485.7  | 0.008 | 0.000064 |
| 100822 | 1340447 | 3953572 | 432.821 | 432.83 | 0.009 | 0.000081 |
| 100749 | 1342551 | 3955980 | 433.101 | 433.11 | 0.009 | 0.000081 |
| 100247 | 1358341 | 3968717 | 437.351 | 437.36 | 0.009 | 0.000081 |
| 103574 | 1376113 | 3968036 | 444.721 | 444.73 | 0.009 | 0.000081 |
| 103742 | 1374023 | 3960558 | 445.571 | 445.58 | 0.009 | 0.000081 |
| 100973 | 1335341 | 3949523 | 447.881 | 447.89 | 0.009 | 0.000081 |
| 103712 | 1374063 | 3961851 | 449.151 | 449.16 | 0.009 | 0.000081 |
| 106748 | 1421795 | 3971641 | 470.931 | 470.94 | 0.009 | 0.000081 |
| 105943 | 1421340 | 3952304 | 474.991 | 475    | 0.009 | 0.000081 |
| 105839 | 1423437 | 3947186 | 476.541 | 476.55 | 0.009 | 0.000081 |
| 105802 | 1424073 | 3945551 | 476.541 | 476.55 | 0.009 | 0.000081 |
| 103375 | 1379609 | 3973965 | 477.391 | 477.4  | 0.009 | 0.000081 |
| 100895 | 1337812 | 3951767 | 432.92  | 432.93 | 0.01  | 0.0001   |
| 101269 | 1341999 | 3955328 | 433     | 433.01 | 0.01  | 0.0001   |
| 100148 | 1358217 | 3963898 | 434.94  | 434.95 | 0.01  | 0.0001   |
| 100584 | 1346209 | 3961975 | 436.75  | 436.76 | 0.01  | 0.0001   |
| 100573 | 1346429 | 3962374 | 436.94  | 436.95 | 0.01  | 0.0001   |
| 104512 | 1373836 | 3954637 | 446.34  | 446.35 | 0.01  | 0.0001   |
| 104184 | 1372411 | 3947277 | 450.98  | 450.99 | 0.01  | 0.0001   |
| 107537 | 1398307 | 3959659 | 457.62  | 457.63 | 0.01  | 0.0001   |
| 107532 | 1398576 | 3959781 | 458.05  | 458.06 | 0.01  | 0.0001   |
| 107509 | 1399716 | 3960298 | 459.03  | 459.04 | 0.01  | 0.0001   |
| 106859 | 1420879 | 3964645 | 470.481 | 470.49 | 0.01  | 0.0001   |
| 100788 | 1341418 | 3954685 | 432.709 | 432.72 | 0.011 | 0.000121 |
| 100705 | 1343726 | 3957542 | 433.829 | 433.84 | 0.011 | 0.000121 |
| 101141 | 1335829 | 3950009 | 434.319 | 434.33 | 0.011 | 0.000121 |
| 100667 | 1344500 | 3958925 | 436.83  | 436.84 | 0.011 | 0.000121 |
| 101328 | 1344380 | 3958683 | 436.909 | 436.92 | 0.011 | 0.000121 |
| 101417 | 1346405 | 3962295 | 437.159 | 437.17 | 0.011 | 0.000121 |
| 100187 | 1358276 | 3966184 | 439.929 | 439.94 | 0.011 | 0.000121 |
| 103470 | 1379410 | 3970679 | 450.799 | 450.81 | 0.011 | 0.000121 |
| 103439 | 1379602 | 3971824 | 451.839 | 451.85 | 0.011 | 0.000121 |
| 107633 | 1395884 | 3955644 | 457.579 | 457.59 | 0.011 | 0.000121 |
| 101538 | 1349461 | 3967862 | 459.199 | 459.21 | 0.011 | 0.000121 |
| 105806 | 1424047 | 3945765 | 476.169 | 476.18 | 0.011 | 0.000121 |
| 105605 | 1429968 | 3938254 | 491.059 | 491.07 | 0.011 | 0.000121 |
| 105553 | 1430125 | 3935601 | 493.759 | 493.77 | 0.011 | 0.000121 |
| 5529   | 1388664 | 4005504 | 738.759 | 738.77 | 0.011 | 0.000121 |
| 101203 | 1337960 | 3951814 | 432.348 | 432.36 | 0.012 | 0.000144 |
| 100886 | 1338148 | 3951915 | 432.558 | 432.57 | 0.012 | 0.000144 |
| 101267 | 1341945 | 3955267 | 432.928 | 432.94 | 0.012 | 0.000144 |
| 103625 | 1374998 | 3965353 | 445.778 | 445.79 | 0.012 | 0.000144 |

|        |         |         |         |        |       |          |
|--------|---------|---------|---------|--------|-------|----------|
| 103719 | 1374046 | 3961491 | 446.528 | 446.54 | 0.012 | 0.000144 |
| 103703 | 1374163 | 3962286 | 450.138 | 450.15 | 0.012 | 0.000144 |
| 104150 | 1372687 | 3947707 | 450.798 | 450.81 | 0.012 | 0.000144 |
| 104146 | 1372721 | 3947767 | 451.048 | 451.06 | 0.012 | 0.000144 |
| 101481 | 1348086 | 3965406 | 454.858 | 454.87 | 0.012 | 0.000144 |
| 100487 | 1348181 | 3965654 | 455.908 | 455.92 | 0.012 | 0.000144 |
| 106272 | 1421809 | 3971481 | 469.788 | 469.8  | 0.012 | 0.000144 |
| 106077 | 1420761 | 3958700 | 472.708 | 472.72 | 0.012 | 0.000144 |
| 106958 | 1420714 | 3957050 | 474.998 | 475.01 | 0.012 | 0.000144 |
| 100817 | 1340591 | 3953737 | 432.877 | 432.89 | 0.013 | 0.000169 |
| 100795 | 1341224 | 3954464 | 433.047 | 433.06 | 0.013 | 0.000169 |
| 100911 | 1337228 | 3951426 | 433.297 | 433.31 | 0.013 | 0.000169 |
| 100127 | 1358205 | 3963222 | 435.347 | 435.36 | 0.013 | 0.000169 |
| 100663 | 1344583 | 3959074 | 436.867 | 436.88 | 0.013 | 0.000169 |
| 100169 | 1358240 | 3964777 | 437.417 | 437.43 | 0.013 | 0.000169 |
| 101804 | 1358387 | 3972480 | 444.447 | 444.46 | 0.013 | 0.000169 |
| 100486 | 1348202 | 3965691 | 456.127 | 456.14 | 0.013 | 0.000169 |
| 101521 | 1349107 | 3967233 | 460.387 | 460.4  | 0.013 | 0.000169 |
| 101832 | 1358072 | 3973772 | 461.277 | 461.29 | 0.013 | 0.000169 |
| 106218 | 1421739 | 3968910 | 470.357 | 470.37 | 0.013 | 0.000169 |
| 101848 | 1357593 | 3974211 | 481.187 | 481.2  | 0.013 | 0.000169 |
| 105616 | 1429562 | 3938642 | 490.107 | 490.12 | 0.013 | 0.000169 |
| 105626 | 1429278 | 3938889 | 490.457 | 490.47 | 0.013 | 0.000169 |
| 105606 | 1429939 | 3938286 | 491.107 | 491.12 | 0.013 | 0.000169 |
| 105441 | 1429144 | 3931459 | 496.187 | 496.2  | 0.013 | 0.000169 |
| 101053 | 1333249 | 3947224 | 545.377 | 545.39 | 0.013 | 0.000169 |
| 101029 | 1334037 | 3947697 | 559.517 | 559.53 | 0.013 | 0.000169 |
| 100089 | 1358157 | 3961640 | 435.066 | 435.08 | 0.014 | 0.000196 |
| 100642 | 1345039 | 3959890 | 436.826 | 436.84 | 0.014 | 0.000196 |
| 100567 | 1346621 | 3962743 | 436.926 | 436.94 | 0.014 | 0.000196 |
| 100245 | 1358341 | 3968669 | 437.217 | 437.23 | 0.014 | 0.000196 |
| 101743 | 1358364 | 3969934 | 437.666 | 437.68 | 0.014 | 0.000196 |
| 103651 | 1374941 | 3964279 | 445.147 | 445.16 | 0.014 | 0.000196 |
| 104498 | 1373818 | 3953962 | 447.226 | 447.24 | 0.014 | 0.000196 |
| 103547 | 1377017 | 3968792 | 447.376 | 447.39 | 0.014 | 0.000196 |
| 103453 | 1379597 | 3971395 | 449.396 | 449.41 | 0.014 | 0.000196 |
| 103701 | 1374200 | 3962378 | 450.196 | 450.21 | 0.014 | 0.000196 |
| 101592 | 1352089 | 3969071 | 450.756 | 450.77 | 0.014 | 0.000196 |
| 101559 | 1350759 | 3968982 | 453.016 | 453.03 | 0.014 | 0.000196 |
| 100501 | 1347886 | 3965124 | 454.276 | 454.29 | 0.014 | 0.000196 |
| 101524 | 1349193 | 3967388 | 460.336 | 460.35 | 0.014 | 0.000196 |
| 106156 | 1420908 | 3965477 | 470.686 | 470.7  | 0.014 | 0.000196 |
| 106170 | 1420921 | 3966125 | 472.466 | 472.48 | 0.014 | 0.000196 |
| 105932 | 1421499 | 3951804 | 476.136 | 476.15 | 0.014 | 0.000196 |
| 101019 | 1334410 | 3947936 | 572.946 | 572.96 | 0.014 | 0.000196 |
| 100114 | 1358187 | 3962721 | 436.265 | 436.28 | 0.015 | 0.000225 |
| 100069 | 1358136 | 3960771 | 436.725 | 436.74 | 0.015 | 0.000225 |
| 101380 | 1345565 | 3960789 | 436.895 | 436.91 | 0.015 | 0.000225 |
| 100353 | 1353134 | 3969059 | 444.515 | 444.53 | 0.015 | 0.000225 |
| 103705 | 1374131 | 3962191 | 449.835 | 449.85 | 0.015 | 0.000225 |
| 103420 | 1379603 | 3972163 | 454.105 | 454.12 | 0.015 | 0.000225 |
| 106147 | 1420902 | 3965087 | 470.515 | 470.53 | 0.015 | 0.000225 |

|        |         |         |         |        |       |          |
|--------|---------|---------|---------|--------|-------|----------|
| 106937 | 1420733 | 3958008 | 474.585 | 474.6  | 0.015 | 0.000225 |
| 105968 | 1420796 | 3953534 | 475.275 | 475.29 | 0.015 | 0.000225 |
| 105938 | 1421417 | 3952071 | 475.485 | 475.5  | 0.015 | 0.000225 |
| 106715 | 1421827 | 3973276 | 475.825 | 475.84 | 0.015 | 0.000225 |
| 105804 | 1424058 | 3945680 | 476.145 | 476.16 | 0.015 | 0.000225 |
| 105445 | 1429147 | 3931645 | 496.185 | 496.2  | 0.015 | 0.000225 |
| 5546   | 1389306 | 4006153 | 747.245 | 747.26 | 0.015 | 0.000225 |
| 100050 | 1357651 | 3959992 | 436.344 | 436.36 | 0.016 | 0.000256 |
| 100597 | 1345926 | 3961471 | 436.814 | 436.83 | 0.016 | 0.000256 |
| 101594 | 1352179 | 3969068 | 450.344 | 450.36 | 0.016 | 0.000256 |
| 100481 | 1348306 | 3965876 | 456.444 | 456.46 | 0.016 | 0.000256 |
| 107623 | 1396038 | 3956164 | 457.134 | 457.15 | 0.016 | 0.000256 |
| 105894 | 1422104 | 3949858 | 474.044 | 474.06 | 0.016 | 0.000256 |
| 106045 | 1420732 | 3957031 | 474.764 | 474.78 | 0.016 | 0.000256 |
| 105563 | 1430345 | 3936057 | 494.394 | 494.41 | 0.016 | 0.000256 |
| 100863 | 1339095 | 3952338 | 434.163 | 434.18 | 0.017 | 0.000289 |
| 101413 | 1346300 | 3962103 | 436.723 | 436.74 | 0.017 | 0.000289 |
| 103722 | 1374043 | 3961364 | 446.273 | 446.29 | 0.017 | 0.000289 |
| 103549 | 1376943 | 3968746 | 447.233 | 447.25 | 0.017 | 0.000289 |
| 103488 | 1378892 | 3970035 | 451.903 | 451.92 | 0.017 | 0.000289 |
| 101542 | 1349534 | 3967993 | 459.023 | 459.04 | 0.017 | 0.000289 |
| 101841 | 1357805 | 3974036 | 473.403 | 473.42 | 0.017 | 0.000289 |
| 101140 | 1335797 | 3949976 | 434.622 | 434.64 | 0.018 | 0.000324 |
| 100146 | 1358215 | 3963824 | 434.902 | 434.92 | 0.018 | 0.000324 |
| 101741 | 1358361 | 3969538 | 436.002 | 436.02 | 0.018 | 0.000324 |
| 101410 | 1346236 | 3961989 | 436.692 | 436.71 | 0.018 | 0.000324 |
| 100163 | 1358232 | 3964496 | 436.812 | 436.83 | 0.018 | 0.000324 |
| 101619 | 1353261 | 3969027 | 445.232 | 445.25 | 0.018 | 0.000324 |
| 103652 | 1374939 | 3964240 | 445.232 | 445.25 | 0.018 | 0.000324 |
| 103847 | 1373848 | 3956019 | 445.772 | 445.79 | 0.018 | 0.000324 |
| 103560 | 1376544 | 3968481 | 445.852 | 445.87 | 0.018 | 0.000324 |
| 104433 | 1373747 | 3951588 | 446.272 | 446.29 | 0.018 | 0.000324 |
| 103548 | 1376980 | 3968769 | 447.322 | 447.34 | 0.018 | 0.000324 |
| 104388 | 1373722 | 3950624 | 453.572 | 453.59 | 0.018 | 0.000324 |
| 100468 | 1348575 | 3966359 | 457.782 | 457.8  | 0.018 | 0.000324 |
| 106833 | 1420903 | 3965961 | 472.512 | 472.53 | 0.018 | 0.000324 |
| 106830 | 1420910 | 3966442 | 472.642 | 472.66 | 0.018 | 0.000324 |
| 106962 | 1420710 | 3956863 | 474.922 | 474.94 | 0.018 | 0.000324 |
| 106306 | 1421844 | 3973245 | 475.792 | 475.81 | 0.018 | 0.000324 |
| 105921 | 1421673 | 3951233 | 477.422 | 477.44 | 0.018 | 0.000324 |
| 105620 | 1429438 | 3938748 | 490.142 | 490.16 | 0.018 | 0.000324 |
| 105624 | 1429326 | 3938846 | 490.342 | 490.36 | 0.018 | 0.000324 |
| 105476 | 1429121 | 3932964 | 495.372 | 495.39 | 0.018 | 0.000324 |
| 100207 | 1358298 | 3967044 | 435.951 | 435.97 | 0.019 | 0.000361 |
| 103927 | 1373754 | 3952293 | 446.051 | 446.07 | 0.019 | 0.000361 |
| 100369 | 1352437 | 3969072 | 448.521 | 448.54 | 0.019 | 0.000361 |
| 100375 | 1352162 | 3969081 | 450.261 | 450.28 | 0.019 | 0.000361 |
| 104382 | 1373717 | 3950510 | 453.651 | 453.67 | 0.019 | 0.000361 |
| 100488 | 1348160 | 3965616 | 455.751 | 455.77 | 0.019 | 0.000361 |
| 101488 | 1348273 | 3965741 | 456.051 | 456.07 | 0.019 | 0.000361 |
| 107597 | 1396393 | 3957381 | 458.171 | 458.19 | 0.019 | 0.000361 |
| 106179 | 1420938 | 3966905 | 471.661 | 471.68 | 0.019 | 0.000361 |

|        |         |         |         |        |       |          |
|--------|---------|---------|---------|--------|-------|----------|
| 106060 | 1420746 | 3957809 | 474.651 | 474.67 | 0.019 | 0.000361 |
| 105612 | 1429698 | 3938522 | 490.221 | 490.24 | 0.019 | 0.000361 |
| 100870 | 1338797 | 3952200 | 433.26  | 433.28 | 0.02  | 0.0004   |
| 100067 | 1358130 | 3960682 | 436.87  | 436.89 | 0.02  | 0.0004   |
| 101745 | 1358366 | 3970020 | 438.15  | 438.17 | 0.02  | 0.0004   |
| 103516 | 1377935 | 3969390 | 448.64  | 448.66 | 0.02  | 0.0004   |
| 103498 | 1378517 | 3969780 | 451.76  | 451.78 | 0.02  | 0.0004   |
| 101467 | 1347731 | 3964770 | 453.2   | 453.22 | 0.02  | 0.0004   |
| 100494 | 1348034 | 3965389 | 455.02  | 455.04 | 0.02  | 0.0004   |
| 106282 | 1421819 | 3971987 | 471.66  | 471.68 | 0.02  | 0.0004   |
| 106926 | 1420742 | 3958533 | 473.18  | 473.2  | 0.02  | 0.0004   |
| 107004 | 1420607 | 3954898 | 475.26  | 475.28 | 0.02  | 0.0004   |
| 105962 | 1420977 | 3953261 | 475.48  | 475.5  | 0.02  | 0.0004   |
| 105911 | 1421840 | 3950722 | 477.03  | 477.05 | 0.02  | 0.0004   |
| 105611 | 1429758 | 3938466 | 490.48  | 490.5  | 0.02  | 0.0004   |
| 105492 | 1429265 | 3933415 | 493.56  | 493.58 | 0.02  | 0.0004   |
| 100701 | 1343811 | 3957692 | 434.339 | 434.36 | 0.021 | 0.000441 |
| 100572 | 1346446 | 3962404 | 436.899 | 436.92 | 0.021 | 0.000441 |
| 101768 | 1358388 | 3970958 | 438.479 | 438.5  | 0.021 | 0.000441 |
| 103468 | 1379448 | 3970763 | 450.539 | 450.56 | 0.021 | 0.000441 |
| 103987 | 1373706 | 3950569 | 454.099 | 454.12 | 0.021 | 0.000441 |
| 100432 | 1349347 | 3967745 | 459.479 | 459.5  | 0.021 | 0.000441 |
| 106216 | 1421718 | 3968800 | 469.119 | 469.14 | 0.021 | 0.000441 |
| 105799 | 1424087 | 3945378 | 476.879 | 476.9  | 0.021 | 0.000441 |
| 100780 | 1341641 | 3954940 | 433.058 | 433.08 | 0.022 | 0.000484 |
| 100054 | 1357817 | 3960096 | 436.598 | 436.62 | 0.022 | 0.000484 |
| 101324 | 1344298 | 3958537 | 436.709 | 436.73 | 0.022 | 0.000484 |
| 101441 | 1347061 | 3963575 | 439.848 | 439.87 | 0.022 | 0.000484 |
| 100188 | 1358277 | 3966225 | 440.478 | 440.5  | 0.022 | 0.000484 |
| 104230 | 1372772 | 3947830 | 451.338 | 451.36 | 0.022 | 0.000484 |
| 104365 | 1373699 | 3950167 | 453.698 | 453.72 | 0.022 | 0.000484 |
| 103986 | 1373708 | 3950589 | 453.948 | 453.97 | 0.022 | 0.000484 |
| 107611 | 1396208 | 3956739 | 456.558 | 456.58 | 0.022 | 0.000484 |
| 107647 | 1395674 | 3954926 | 458.228 | 458.25 | 0.022 | 0.000484 |
| 103403 | 1379603 | 3972754 | 459.118 | 459.14 | 0.022 | 0.000484 |
| 107572 | 1396837 | 3958648 | 460.068 | 460.09 | 0.022 | 0.000484 |
| 107487 | 1400784 | 3960771 | 460.538 | 460.56 | 0.022 | 0.000484 |
| 106799 | 1421137 | 3967669 | 470.828 | 470.85 | 0.022 | 0.000484 |
| 105680 | 1427325 | 3940577 | 487.758 | 487.78 | 0.022 | 0.000484 |
| 5524   | 1388467 | 4005315 | 735.988 | 736.01 | 0.022 | 0.000484 |
| 100807 | 1340881 | 3954071 | 432.777 | 432.8  | 0.023 | 0.000529 |
| 100676 | 1344314 | 3958595 | 436.777 | 436.8  | 0.023 | 0.000529 |
| 101327 | 1344360 | 3958646 | 436.897 | 436.92 | 0.023 | 0.000529 |
| 100352 | 1353179 | 3969057 | 444.627 | 444.65 | 0.023 | 0.000529 |
| 103995 | 1373693 | 3950403 | 453.537 | 453.56 | 0.023 | 0.000529 |
| 101121 | 1335174 | 3949333 | 465.877 | 465.9  | 0.023 | 0.000529 |
| 106807 | 1421010 | 3967374 | 471.147 | 471.17 | 0.023 | 0.000529 |
| 106967 | 1420702 | 3956620 | 474.997 | 475.02 | 0.023 | 0.000529 |
| 105690 | 1426898 | 3940921 | 488.337 | 488.36 | 0.023 | 0.000529 |
| 105483 | 1429194 | 3933203 | 494.357 | 494.38 | 0.023 | 0.000529 |
| 101089 | 1334473 | 3947983 | 574.057 | 574.08 | 0.023 | 0.000529 |
| 100757 | 1342308 | 3955703 | 433.126 | 433.15 | 0.024 | 0.000576 |

|        |         |         |         |        |       |          |
|--------|---------|---------|---------|--------|-------|----------|
| 101136 | 1335669 | 3949843 | 435.697 | 435.72 | 0.024 | 0.000576 |
| 100115 | 1358189 | 3962763 | 436.176 | 436.2  | 0.024 | 0.000576 |
| 100594 | 1345990 | 3961584 | 436.836 | 436.86 | 0.024 | 0.000576 |
| 101388 | 1345726 | 3961078 | 436.936 | 436.96 | 0.024 | 0.000576 |
| 103949 | 1373736 | 3951558 | 446.066 | 446.09 | 0.024 | 0.000576 |
| 103912 | 1373777 | 3952976 | 447.386 | 447.41 | 0.024 | 0.000576 |
| 107605 | 1396282 | 3956992 | 456.256 | 456.28 | 0.024 | 0.000576 |
| 103398 | 1379602 | 3972956 | 460.776 | 460.8  | 0.024 | 0.000576 |
| 106968 | 1420702 | 3956587 | 474.896 | 474.92 | 0.024 | 0.000576 |
| 106965 | 1420705 | 3956721 | 475.087 | 475.11 | 0.024 | 0.000576 |
| 105862 | 1422719 | 3948193 | 478.486 | 478.51 | 0.024 | 0.000576 |
| 105688 | 1426974 | 3940865 | 488.436 | 488.46 | 0.024 | 0.000576 |
| 105632 | 1429070 | 3939069 | 490.226 | 490.25 | 0.024 | 0.000576 |
| 101060 | 1333437 | 3947334 | 540.437 | 540.46 | 0.024 | 0.000576 |
| 100885 | 1338186 | 3951932 | 432.605 | 432.63 | 0.025 | 0.000625 |
| 100135 | 1358212 | 3963438 | 434.955 | 434.98 | 0.025 | 0.000625 |
| 104425 | 1373744 | 3951425 | 446.645 | 446.67 | 0.025 | 0.000625 |
| 103983 | 1373713 | 3950653 | 452.485 | 452.51 | 0.025 | 0.000625 |
| 103434 | 1379601 | 3971895 | 452.485 | 452.51 | 0.025 | 0.000625 |
| 100975 | 1335281 | 3949460 | 452.935 | 452.96 | 0.025 | 0.000625 |
| 107630 | 1395932 | 3955806 | 456.655 | 456.68 | 0.025 | 0.000625 |
| 107563 | 1397124 | 3958990 | 459.345 | 459.37 | 0.025 | 0.000625 |
| 107587 | 1396545 | 3957928 | 459.495 | 459.52 | 0.025 | 0.000625 |
| 106856 | 1420883 | 3964807 | 470.305 | 470.33 | 0.025 | 0.000625 |
| 106163 | 1420915 | 3965799 | 471.725 | 471.75 | 0.025 | 0.000625 |
| 105944 | 1421313 | 3952384 | 474.785 | 474.81 | 0.025 | 0.000625 |
| 105879 | 1422347 | 3949082 | 476.675 | 476.7  | 0.025 | 0.000625 |
| 105665 | 1427877 | 3940103 | 488.295 | 488.32 | 0.025 | 0.000625 |
| 105466 | 1429081 | 3932564 | 495.915 | 495.94 | 0.025 | 0.000625 |
| 5551   | 1389498 | 4006349 | 749.535 | 749.56 | 0.025 | 0.000625 |
| 100659 | 1344667 | 3959225 | 437.164 | 437.19 | 0.026 | 0.000676 |
| 104446 | 1373755 | 3951911 | 445.924 | 445.95 | 0.026 | 0.000676 |
| 107635 | 1395861 | 3955561 | 457.394 | 457.42 | 0.026 | 0.000676 |
| 107594 | 1396437 | 3957546 | 458.354 | 458.38 | 0.026 | 0.000676 |
| 106878 | 1420855 | 3963648 | 473.394 | 473.42 | 0.026 | 0.000676 |
| 106107 | 1420790 | 3960205 | 474.854 | 474.88 | 0.026 | 0.000676 |
| 101850 | 1357531 | 3974262 | 482.614 | 482.64 | 0.026 | 0.000676 |
| 105683 | 1427225 | 3940661 | 487.744 | 487.77 | 0.026 | 0.000676 |
| 105660 | 1428060 | 3939944 | 488.514 | 488.54 | 0.026 | 0.000676 |
| 101244 | 1340684 | 3953824 | 432.963 | 432.99 | 0.027 | 0.000729 |
| 100731 | 1343077 | 3956587 | 433.163 | 433.19 | 0.027 | 0.000729 |
| 100698 | 1343873 | 3957804 | 434.693 | 434.72 | 0.027 | 0.000729 |
| 100571 | 1346461 | 3962433 | 436.853 | 436.88 | 0.027 | 0.000729 |
| 103749 | 1374003 | 3960314 | 444.723 | 444.75 | 0.027 | 0.000729 |
| 107556 | 1397433 | 3959235 | 458.883 | 458.91 | 0.027 | 0.000729 |
| 107569 | 1396905 | 3958747 | 459.903 | 459.93 | 0.027 | 0.000729 |
| 107496 | 1400387 | 3960603 | 460.163 | 460.19 | 0.027 | 0.000729 |
| 107478 | 1401177 | 3960924 | 460.173 | 460.2  | 0.027 | 0.000729 |
| 106855 | 1420884 | 3964848 | 470.343 | 470.37 | 0.027 | 0.000729 |
| 106127 | 1420882 | 3964204 | 471.273 | 471.3  | 0.027 | 0.000729 |
| 106034 | 1420720 | 3956489 | 474.973 | 475    | 0.027 | 0.000729 |
| 105888 | 1422193 | 3949574 | 475.003 | 475.03 | 0.027 | 0.000729 |



|        |         |         |         |        |       |          |
|--------|---------|---------|---------|--------|-------|----------|
| 106093 | 1420776 | 3959524 | 475.163 | 475.19 | 0.027 | 0.000729 |
| 105619 | 1429486 | 3938708 | 490.083 | 490.11 | 0.027 | 0.000729 |
| 105558 | 1430239 | 3935830 | 493.873 | 493.9  | 0.027 | 0.000729 |
| 105447 | 1429149 | 3931721 | 495.983 | 496.01 | 0.027 | 0.000729 |
| 101057 | 1333346 | 3947281 | 541.573 | 541.6  | 0.027 | 0.000729 |
| 101250 | 1341241 | 3954460 | 433.002 | 433.03 | 0.028 | 0.000784 |
| 100096 | 1358164 | 3961933 | 435.802 | 435.83 | 0.028 | 0.000784 |
| 100223 | 1358316 | 3967756 | 436.652 | 436.68 | 0.028 | 0.000784 |
| 100635 | 1345174 | 3960139 | 436.682 | 436.71 | 0.028 | 0.000784 |
| 100060 | 1358028 | 3960350 | 436.752 | 436.78 | 0.028 | 0.000784 |
| 100541 | 1347028 | 3963555 | 440.032 | 440.06 | 0.028 | 0.000784 |
| 101473 | 1347873 | 3965025 | 453.852 | 453.88 | 0.028 | 0.000784 |
| 107672 | 1395280 | 3953590 | 460.682 | 460.71 | 0.028 | 0.000784 |
| 106161 | 1420914 | 3965728 | 471.332 | 471.36 | 0.028 | 0.000784 |
| 105847 | 1423200 | 3947502 | 476.712 | 476.74 | 0.028 | 0.000784 |
| 105693 | 1426739 | 3941029 | 488.292 | 488.32 | 0.028 | 0.000784 |
| 105636 | 1428940 | 3939182 | 490.042 | 490.07 | 0.028 | 0.000784 |
| 101183 | 1337164 | 3951359 | 432.851 | 432.88 | 0.029 | 0.000841 |
| 101232 | 1340277 | 3953359 | 432.932 | 432.96 | 0.029 | 0.000841 |
| 100763 | 1342125 | 3955493 | 433.181 | 433.21 | 0.029 | 0.000841 |
| 100142 | 1358211 | 3963676 | 434.751 | 434.78 | 0.029 | 0.000841 |
| 100153 | 1358222 | 3964082 | 435.161 | 435.19 | 0.029 | 0.000841 |
| 101420 | 1346466 | 3962409 | 437.071 | 437.1  | 0.029 | 0.000841 |
| 100559 | 1346695 | 3962903 | 437.132 | 437.16 | 0.029 | 0.000841 |
| 100658 | 1344689 | 3959263 | 437.141 | 437.17 | 0.029 | 0.000841 |
| 100198 | 1358288 | 3966646 | 439.541 | 439.57 | 0.029 | 0.000841 |
| 103903 | 1373789 | 3953328 | 446.962 | 446.99 | 0.029 | 0.000841 |
| 103414 | 1379603 | 3972356 | 455.351 | 455.38 | 0.029 | 0.000841 |
| 106140 | 1420896 | 3964773 | 470.361 | 470.39 | 0.029 | 0.000841 |
| 106999 | 1420650 | 3955110 | 475.511 | 475.54 | 0.029 | 0.000841 |
| 105934 | 1421476 | 3951882 | 475.931 | 475.96 | 0.029 | 0.000841 |
| 105735 | 1424463 | 3941951 | 486.381 | 486.41 | 0.029 | 0.000841 |
| 101035 | 1333816 | 3947569 | 551.351 | 551.38 | 0.029 | 0.000841 |
| 101083 | 1334275 | 3947822 | 568.371 | 568.4  | 0.029 | 0.000841 |
| 100752 | 1342460 | 3955878 | 433.11  | 433.14 | 0.03  | 0.0009   |
| 101360 | 1345146 | 3960050 | 436.82  | 436.85 | 0.03  | 0.0009   |
| 100045 | 1357466 | 3959899 | 436.83  | 436.86 | 0.03  | 0.0009   |
| 100249 | 1358342 | 3968753 | 437.32  | 437.35 | 0.03  | 0.0009   |
| 103506 | 1378237 | 3969594 | 450.78  | 450.81 | 0.03  | 0.0009   |
| 103499 | 1378482 | 3969757 | 451.58  | 451.61 | 0.03  | 0.0009   |
| 104013 | 1373682 | 3950054 | 453.62  | 453.65 | 0.03  | 0.0009   |
| 107512 | 1399599 | 3960243 | 458.92  | 458.95 | 0.03  | 0.0009   |
| 103389 | 1379603 | 3973337 | 465.03  | 465.06 | 0.03  | 0.0009   |
| 106124 | 1420879 | 3964061 | 471.79  | 471.82 | 0.03  | 0.0009   |
| 105886 | 1422232 | 3949452 | 475.44  | 475.47 | 0.03  | 0.0009   |
| 105842 | 1423348 | 3947308 | 476.25  | 476.28 | 0.03  | 0.0009   |
| 105615 | 1429615 | 3938597 | 490.08  | 490.11 | 0.03  | 0.0009   |
| 100879 | 1338420 | 3952035 | 432.509 | 432.54 | 0.031 | 0.000961 |
| 101272 | 1342079 | 3955420 | 433.099 | 433.13 | 0.031 | 0.000961 |
| 100631 | 1345250 | 3960276 | 436.729 | 436.76 | 0.031 | 0.000961 |
| 100625 | 1345360 | 3960471 | 437.099 | 437.13 | 0.031 | 0.000961 |
| 101438 | 1346988 | 3963427 | 439.029 | 439.06 | 0.031 | 0.000961 |

|        |         |         |         |        |       |          |
|--------|---------|---------|---------|--------|-------|----------|
| 101754 | 1358375 | 3970389 | 440.199 | 440.23 | 0.031 | 0.000961 |
| 100351 | 1353224 | 3969056 | 444.809 | 444.84 | 0.031 | 0.000961 |
| 100522 | 1347433 | 3964314 | 445.539 | 445.57 | 0.031 | 0.000961 |
| 103671 | 1374812 | 3963539 | 447.619 | 447.65 | 0.031 | 0.000961 |
| 103456 | 1379585 | 3971272 | 449.339 | 449.37 | 0.031 | 0.000961 |
| 104003 | 1373687 | 3950243 | 453.519 | 453.55 | 0.031 | 0.000961 |
| 107485 | 1400855 | 3960799 | 460.599 | 460.63 | 0.031 | 0.000961 |
| 106030 | 1420716 | 3956285 | 475.339 | 475.37 | 0.031 | 0.000961 |
| 105439 | 1429142 | 3931354 | 495.799 | 495.83 | 0.031 | 0.000961 |
| 5545   | 1389268 | 4006115 | 746.769 | 746.8  | 0.031 | 0.000961 |
| 100894 | 1337850 | 3951784 | 432.818 | 432.85 | 0.032 | 0.001024 |
| 101280 | 1342302 | 3955676 | 432.998 | 433.03 | 0.032 | 0.001024 |
| 100756 | 1342339 | 3955738 | 433.198 | 433.23 | 0.032 | 0.001024 |
| 100141 | 1358212 | 3963638 | 434.778 | 434.81 | 0.032 | 0.001024 |
| 100149 | 1358218 | 3963935 | 434.948 | 434.98 | 0.032 | 0.001024 |
| 100588 | 1346120 | 3961816 | 436.828 | 436.86 | 0.032 | 0.001024 |
| 101133 | 1335575 | 3949746 | 436.968 | 437    | 0.032 | 0.001024 |
| 100246 | 1358341 | 3968695 | 437.288 | 437.32 | 0.032 | 0.001024 |
| 103910 | 1373780 | 3953054 | 447.298 | 447.33 | 0.032 | 0.001024 |
| 103507 | 1378202 | 3969571 | 450.618 | 450.65 | 0.032 | 0.001024 |
| 103492 | 1378742 | 3969927 | 452.038 | 452.07 | 0.032 | 0.001024 |
| 101464 | 1347648 | 3964622 | 452.138 | 452.17 | 0.032 | 0.001024 |
| 107652 | 1395596 | 3954659 | 458.348 | 458.38 | 0.032 | 0.001024 |
| 107469 | 1401588 | 3961079 | 460.238 | 460.27 | 0.032 | 0.001024 |
| 105659 | 1428122 | 3939891 | 488.538 | 488.57 | 0.032 | 0.001024 |
| 105590 | 1430386 | 3937550 | 491.828 | 491.86 | 0.032 | 0.001024 |
| 100162 | 1358231 | 3964450 | 436.807 | 436.84 | 0.033 | 0.001089 |
| 100607 | 1345712 | 3961088 | 436.887 | 436.92 | 0.033 | 0.001089 |
| 101779 | 1358364 | 3971372 | 439.637 | 439.67 | 0.033 | 0.001089 |
| 103567 | 1376319 | 3968281 | 446.257 | 446.29 | 0.033 | 0.001089 |
| 103721 | 1374044 | 3961406 | 446.307 | 446.34 | 0.033 | 0.001089 |
| 103490 | 1378818 | 3969979 | 451.887 | 451.92 | 0.033 | 0.001089 |
| 107522 | 1399071 | 3960001 | 458.547 | 458.58 | 0.033 | 0.001089 |
| 106126 | 1420881 | 3964168 | 471.378 | 471.41 | 0.033 | 0.001089 |
| 106917 | 1420751 | 3958957 | 473.227 | 473.26 | 0.033 | 0.001089 |
| 105479 | 1429158 | 3933085 | 495.027 | 495.06 | 0.033 | 0.001089 |
| 101076 | 1334002 | 3947663 | 558.037 | 558.07 | 0.033 | 0.001089 |
| 100934 | 1336509 | 3950733 | 432.826 | 432.86 | 0.034 | 0.001156 |
| 101235 | 1340359 | 3953453 | 432.876 | 432.91 | 0.034 | 0.001156 |
| 100093 | 1358161 | 3961807 | 435.346 | 435.38 | 0.034 | 0.001156 |
| 100661 | 1344625 | 3959149 | 437.106 | 437.14 | 0.034 | 0.001156 |
| 103663 | 1374897 | 3963838 | 446.486 | 446.52 | 0.034 | 0.001156 |
| 104232 | 1372788 | 3947858 | 451.456 | 451.49 | 0.034 | 0.001156 |
| 104375 | 1373709 | 3950373 | 453.526 | 453.56 | 0.034 | 0.001156 |
| 100492 | 1348076 | 3965464 | 455.286 | 455.32 | 0.034 | 0.001156 |
| 100445 | 1349067 | 3967239 | 460.336 | 460.37 | 0.034 | 0.001156 |
| 106203 | 1421470 | 3968202 | 463.566 | 463.6  | 0.034 | 0.001156 |
| 106758 | 1421787 | 3971154 | 469.936 | 469.97 | 0.034 | 0.001156 |
| 106847 | 1420892 | 3965256 | 470.486 | 470.52 | 0.034 | 0.001156 |
| 105490 | 1429252 | 3933367 | 493.816 | 493.85 | 0.034 | 0.001156 |
| 100070 | 1358137 | 3960815 | 436.535 | 436.57 | 0.035 | 0.001225 |
| 100672 | 1344397 | 3958741 | 436.905 | 436.94 | 0.035 | 0.001225 |

|        |         |         |         |        |       |          |
|--------|---------|---------|---------|--------|-------|----------|
| 103500 | 1378447 | 3969734 | 451.385 | 451.42 | 0.035 | 0.001225 |
| 103408 | 1379603 | 3972569 | 457.435 | 457.47 | 0.035 | 0.001225 |
| 106192 | 1421198 | 3967742 | 469.925 | 469.96 | 0.035 | 0.001225 |
| 106252 | 1421806 | 3970636 | 471.705 | 471.74 | 0.035 | 0.001225 |
| 106996 | 1420669 | 3955263 | 475.325 | 475.36 | 0.035 | 0.001225 |
| 106312 | 1421851 | 3973591 | 477.875 | 477.91 | 0.035 | 0.001225 |
| 105700 | 1426370 | 3941225 | 487.695 | 487.73 | 0.035 | 0.001225 |
| 100727 | 1343189 | 3956726 | 433.074 | 433.11 | 0.036 | 0.001296 |
| 100755 | 1342369 | 3955773 | 433.104 | 433.14 | 0.036 | 0.001296 |
| 100095 | 1358163 | 3961891 | 435.675 | 435.71 | 0.036 | 0.001296 |
| 101429 | 1346796 | 3963039 | 438.084 | 438.12 | 0.036 | 0.001296 |
| 100550 | 1346847 | 3963186 | 438.434 | 438.47 | 0.036 | 0.001296 |
| 103952 | 1373735 | 3951474 | 446.604 | 446.64 | 0.036 | 0.001296 |
| 103957 | 1373733 | 3951333 | 446.754 | 446.79 | 0.036 | 0.001296 |
| 103441 | 1379601 | 3971782 | 451.464 | 451.5  | 0.036 | 0.001296 |
| 107591 | 1396481 | 3957715 | 458.704 | 458.74 | 0.036 | 0.001296 |
| 107513 | 1399520 | 3960206 | 458.765 | 458.8  | 0.036 | 0.001296 |
| 107568 | 1396954 | 3958811 | 459.814 | 459.85 | 0.036 | 0.001296 |
| 106050 | 1420736 | 3957265 | 474.664 | 474.7  | 0.036 | 0.001296 |
| 105691 | 1426859 | 3940949 | 488.344 | 488.38 | 0.036 | 0.001296 |
| 105613 | 1429669 | 3938548 | 490.154 | 490.19 | 0.036 | 0.001296 |
| 5539   | 1389043 | 4005887 | 743.524 | 743.56 | 0.036 | 0.001296 |
| 100773 | 1341837 | 3955165 | 433.023 | 433.06 | 0.037 | 0.001369 |
| 100145 | 1358214 | 3963788 | 434.863 | 434.9  | 0.037 | 0.001369 |
| 100130 | 1358208 | 3963308 | 435.223 | 435.26 | 0.037 | 0.001369 |
| 100073 | 1358139 | 3960948 | 436.503 | 436.54 | 0.037 | 0.001369 |
| 100059 | 1358001 | 3960302 | 436.743 | 436.78 | 0.037 | 0.001369 |
| 101389 | 1345742 | 3961107 | 436.933 | 436.97 | 0.037 | 0.001369 |
| 100675 | 1344335 | 3958631 | 436.933 | 436.97 | 0.037 | 0.001369 |
| 100535 | 1347146 | 3963796 | 440.543 | 440.58 | 0.037 | 0.001369 |
| 103591 | 1375686 | 3967471 | 442.733 | 442.77 | 0.037 | 0.001369 |
| 104505 | 1373827 | 3954282 | 447.233 | 447.27 | 0.037 | 0.001369 |
| 104393 | 1373726 | 3950730 | 449.163 | 449.2  | 0.037 | 0.001369 |
| 104378 | 1373712 | 3950434 | 453.523 | 453.56 | 0.037 | 0.001369 |
| 104000 | 1373689 | 3950302 | 453.553 | 453.59 | 0.037 | 0.001369 |
| 103994 | 1373694 | 3950424 | 453.563 | 453.6  | 0.037 | 0.001369 |
| 100440 | 1349176 | 3967434 | 460.223 | 460.26 | 0.037 | 0.001369 |
| 106185 | 1421075 | 3967493 | 470.183 | 470.22 | 0.037 | 0.001369 |
| 106851 | 1420888 | 3965053 | 470.453 | 470.49 | 0.037 | 0.001369 |
| 105900 | 1422004 | 3950182 | 474.663 | 474.7  | 0.037 | 0.001369 |
| 106047 | 1420733 | 3957109 | 474.693 | 474.73 | 0.037 | 0.001369 |
| 106955 | 1420716 | 3957163 | 474.853 | 474.89 | 0.037 | 0.001369 |
| 105863 | 1422696 | 3948233 | 478.553 | 478.59 | 0.037 | 0.001369 |
| 105868 | 1422552 | 3948517 | 478.583 | 478.62 | 0.037 | 0.001369 |
| 105715 | 1425553 | 3941494 | 485.633 | 485.67 | 0.037 | 0.001369 |
| 103562 | 1376476 | 3968427 | 446.042 | 446.08 | 0.038 | 0.001444 |
| 103906 | 1373785 | 3953210 | 446.882 | 446.92 | 0.038 | 0.001444 |
| 101463 | 1347627 | 3964585 | 451.802 | 451.84 | 0.038 | 0.001444 |
| 103438 | 1379602 | 3971842 | 452.082 | 452.12 | 0.038 | 0.001444 |
| 106056 | 1420742 | 3957596 | 474.722 | 474.76 | 0.038 | 0.001444 |
| 105732 | 1424577 | 3941869 | 486.282 | 486.32 | 0.038 | 0.001444 |
| 105530 | 1429712 | 3934798 | 493.292 | 493.33 | 0.038 | 0.001444 |

|        |         |         |         |        |       |          |
|--------|---------|---------|---------|--------|-------|----------|
| 105525 | 1429611 | 3934523 | 493.721 | 493.76 | 0.038 | 0.001444 |
| 101150 | 1336115 | 3950307 | 433.021 | 433.06 | 0.039 | 0.001521 |
| 100725 | 1343244 | 3956796 | 433.041 | 433.08 | 0.039 | 0.001521 |
| 101139 | 1335765 | 3949943 | 434.791 | 434.83 | 0.039 | 0.001521 |
| 100055 | 1357857 | 3960130 | 436.671 | 436.71 | 0.039 | 0.001521 |
| 103583 | 1375890 | 3967739 | 443.271 | 443.31 | 0.039 | 0.001521 |
| 103878 | 1373817 | 3954420 | 446.881 | 446.92 | 0.039 | 0.001521 |
| 107637 | 1395823 | 3955435 | 457.921 | 457.96 | 0.039 | 0.001521 |
| 103406 | 1379603 | 3972641 | 458.011 | 458.05 | 0.039 | 0.001521 |
| 107507 | 1399834 | 3960353 | 459.041 | 459.08 | 0.039 | 0.001521 |
| 106818 | 1420921 | 3966920 | 472.141 | 472.18 | 0.039 | 0.001521 |
| 106080 | 1420764 | 3958871 | 472.921 | 472.96 | 0.039 | 0.001521 |
| 106902 | 1420764 | 3959734 | 475.041 | 475.08 | 0.039 | 0.001521 |
| 106029 | 1420715 | 3956245 | 475.341 | 475.38 | 0.039 | 0.001521 |
| 105473 | 1429095 | 3932868 | 495.491 | 495.53 | 0.039 | 0.001521 |
| 101065 | 1333596 | 3947427 | 543.231 | 543.27 | 0.039 | 0.001521 |
| 5549   | 1389421 | 4006270 | 748.671 | 748.71 | 0.039 | 0.001521 |
| 101184 | 1337200 | 3951387 | 432.91  | 432.95 | 0.04  | 0.0016   |
| 100766 | 1342038 | 3955394 | 433.31  | 433.35 | 0.04  | 0.0016   |
| 100110 | 1358181 | 3962548 | 436.52  | 436.56 | 0.04  | 0.0016   |
| 101785 | 1358362 | 3971625 | 440.76  | 440.8  | 0.04  | 0.0016   |
| 100971 | 1335402 | 3949586 | 443.43  | 443.47 | 0.04  | 0.0016   |
| 103559 | 1376579 | 3968507 | 445.88  | 445.92 | 0.04  | 0.0016   |
| 103730 | 1374034 | 3961031 | 445.92  | 445.96 | 0.04  | 0.0016   |
| 103888 | 1373805 | 3953962 | 447.18  | 447.22 | 0.04  | 0.0016   |
| 107520 | 1399195 | 3960057 | 458.66  | 458.7  | 0.04  | 0.0016   |
| 106112 | 1420865 | 3963498 | 473.75  | 473.79 | 0.04  | 0.0016   |
| 106062 | 1420747 | 3957891 | 474.59  | 474.63 | 0.04  | 0.0016   |
| 106020 | 1420707 | 3955796 | 475.27  | 475.31 | 0.04  | 0.0016   |
| 106992 | 1420682 | 3955457 | 475.42  | 475.46 | 0.04  | 0.0016   |
| 101260 | 1341749 | 3955043 | 432.899 | 432.94 | 0.041 | 0.001681 |
| 100745 | 1342669 | 3956116 | 433.059 | 433.1  | 0.041 | 0.001681 |
| 100074 | 1358140 | 3960991 | 436.409 | 436.45 | 0.041 | 0.001681 |
| 100627 | 1345325 | 3960407 | 437.039 | 437.08 | 0.041 | 0.001681 |
| 100202 | 1358292 | 3966821 | 437.259 | 437.3  | 0.041 | 0.001681 |
| 104435 | 1373748 | 3951628 | 446.569 | 446.61 | 0.041 | 0.001681 |
| 104490 | 1373810 | 3953592 | 447.289 | 447.33 | 0.041 | 0.001681 |
| 103522 | 1377820 | 3969313 | 447.889 | 447.93 | 0.041 | 0.001681 |
| 104394 | 1373727 | 3950754 | 448.399 | 448.44 | 0.041 | 0.001681 |
| 101600 | 1352448 | 3969059 | 448.499 | 448.54 | 0.041 | 0.001681 |
| 103445 | 1379602 | 3971674 | 450.589 | 450.63 | 0.041 | 0.001681 |
| 100512 | 1347650 | 3964702 | 452.939 | 452.98 | 0.041 | 0.001681 |
| 104381 | 1373715 | 3950491 | 453.609 | 453.65 | 0.041 | 0.001681 |
| 103395 | 1379602 | 3973081 | 461.839 | 461.88 | 0.041 | 0.001681 |
| 106835 | 1420901 | 3965849 | 472.139 | 472.18 | 0.041 | 0.001681 |
| 106901 | 1420764 | 3959771 | 474.939 | 474.98 | 0.041 | 0.001681 |
| 101277 | 1342216 | 3955577 | 432.948 | 432.99 | 0.042 | 0.001764 |
| 101362 | 1345189 | 3960127 | 436.908 | 436.95 | 0.042 | 0.001764 |
| 101340 | 1344633 | 3959134 | 436.938 | 436.98 | 0.042 | 0.001764 |
| 101354 | 1344991 | 3959774 | 437.018 | 437.06 | 0.042 | 0.001764 |
| 100525 | 1347366 | 3964194 | 443.158 | 443.2  | 0.042 | 0.001764 |
| 103974 | 1373721 | 3950852 | 446.858 | 446.9  | 0.042 | 0.001764 |

|        |         |         |         |        |       |          |
|--------|---------|---------|---------|--------|-------|----------|
| 103526 | 1377633 | 3969193 | 447.688 | 447.73 | 0.042 | 0.001764 |
| 103678 | 1374701 | 3963297 | 448.468 | 448.51 | 0.042 | 0.001764 |
| 103603 | 1375389 | 3967033 | 450.838 | 450.88 | 0.042 | 0.001764 |
| 101582 | 1351654 | 3969071 | 451.008 | 451.05 | 0.042 | 0.001764 |
| 100393 | 1351400 | 3969119 | 452.858 | 452.9  | 0.042 | 0.001764 |
| 103396 | 1379602 | 3973039 | 461.378 | 461.42 | 0.042 | 0.001764 |
| 106700 | 1421842 | 3974069 | 479.418 | 479.46 | 0.042 | 0.001764 |
| 106691 | 1421851 | 3974544 | 481.968 | 482.01 | 0.042 | 0.001764 |
| 105733 | 1424539 | 3941895 | 486.368 | 486.41 | 0.042 | 0.001764 |
| 5526   | 1388548 | 4005390 | 737.248 | 737.29 | 0.042 | 0.001764 |
| 101213 | 1338358 | 3951993 | 432.507 | 432.55 | 0.043 | 0.001849 |
| 100801 | 1341054 | 3954269 | 432.717 | 432.76 | 0.043 | 0.001849 |
| 101755 | 1358376 | 3970430 | 440.177 | 440.22 | 0.043 | 0.001849 |
| 101578 | 1351487 | 3969073 | 451.437 | 451.48 | 0.043 | 0.001849 |
| 104082 | 1373314 | 3948810 | 452.317 | 452.36 | 0.043 | 0.001849 |
| 107610 | 1396219 | 3956776 | 456.667 | 456.71 | 0.043 | 0.001849 |
| 106215 | 1421709 | 3968763 | 468.597 | 468.64 | 0.043 | 0.001849 |
| 106182 | 1421037 | 3967395 | 470.527 | 470.57 | 0.043 | 0.001849 |
| 106117 | 1420873 | 3963766 | 472.807 | 472.85 | 0.043 | 0.001849 |
| 106914 | 1420754 | 3959123 | 473.957 | 474    | 0.043 | 0.001849 |
| 107018 | 1420314 | 3954133 | 474.597 | 474.64 | 0.043 | 0.001849 |
| 106103 | 1420786 | 3959998 | 475.047 | 475.09 | 0.043 | 0.001849 |
| 106990 | 1420686 | 3955574 | 475.227 | 475.27 | 0.043 | 0.001849 |
| 105808 | 1424028 | 3945887 | 476.097 | 476.14 | 0.043 | 0.001849 |
| 105864 | 1422653 | 3948313 | 478.747 | 478.79 | 0.043 | 0.001849 |
| 106326 | 1421866 | 3974330 | 480.757 | 480.8  | 0.043 | 0.001849 |
| 101048 | 1333141 | 3947134 | 550.927 | 550.97 | 0.043 | 0.001849 |
| 100887 | 1338110 | 3951899 | 432.466 | 432.51 | 0.044 | 0.001936 |
| 100614 | 1345571 | 3960836 | 436.936 | 436.98 | 0.044 | 0.001936 |
| 101368 | 1345314 | 3960352 | 437.086 | 437.13 | 0.044 | 0.001936 |
| 103737 | 1374026 | 3960746 | 445.676 | 445.72 | 0.044 | 0.001936 |
| 101823 | 1358274 | 3973419 | 453.416 | 453.46 | 0.044 | 0.001936 |
| 106848 | 1420891 | 3965215 | 470.476 | 470.52 | 0.044 | 0.001936 |
| 106150 | 1420906 | 3965227 | 470.486 | 470.53 | 0.044 | 0.001936 |
| 106925 | 1420743 | 3958570 | 473.036 | 473.08 | 0.044 | 0.001936 |
| 105557 | 1430220 | 3935792 | 493.846 | 493.89 | 0.044 | 0.001936 |
| 101058 | 1333375 | 3947298 | 540.996 | 541.04 | 0.044 | 0.001936 |
| 101214 | 1338400 | 3952012 | 432.486 | 432.53 | 0.045 | 0.002025 |
| 100601 | 1345839 | 3961316 | 436.805 | 436.85 | 0.045 | 0.002025 |
| 100370 | 1352392 | 3969073 | 448.705 | 448.75 | 0.045 | 0.002025 |
| 106935 | 1420734 | 3958082 | 474.225 | 474.27 | 0.045 | 0.002025 |
| 101167 | 1336658 | 3950868 | 432.614 | 432.66 | 0.046 | 0.002116 |
| 100783 | 1341557 | 3954844 | 432.904 | 432.95 | 0.046 | 0.002116 |
| 101242 | 1340549 | 3953669 | 432.904 | 432.95 | 0.046 | 0.002116 |
| 100125 | 1358203 | 3963157 | 435.434 | 435.48 | 0.046 | 0.002116 |
| 100651 | 1344844 | 3959541 | 437.064 | 437.11 | 0.046 | 0.002116 |
| 100652 | 1344822 | 3959500 | 437.074 | 437.12 | 0.046 | 0.002116 |
| 101432 | 1346848 | 3963141 | 438.314 | 438.36 | 0.046 | 0.002116 |
| 103928 | 1373753 | 3952259 | 445.955 | 446    | 0.046 | 0.002116 |
| 103720 | 1374045 | 3961448 | 446.354 | 446.4  | 0.046 | 0.002116 |
| 104489 | 1373808 | 3953549 | 447.334 | 447.38 | 0.046 | 0.002116 |
| 101126 | 1335327 | 3949491 | 449.584 | 449.63 | 0.046 | 0.002116 |

|        |         |         |         |        |       |          |
|--------|---------|---------|---------|--------|-------|----------|
| 100384 | 1351775 | 3969099 | 450.994 | 451.04 | 0.046 | 0.002116 |
| 101576 | 1351405 | 3969074 | 451.124 | 451.17 | 0.046 | 0.002116 |
| 104372 | 1373706 | 3950312 | 453.574 | 453.62 | 0.046 | 0.002116 |
| 106186 | 1421089 | 3967525 | 470.344 | 470.39 | 0.046 | 0.002116 |
| 106825 | 1420912 | 3966636 | 472.374 | 472.42 | 0.046 | 0.002116 |
| 106105 | 1420788 | 3960122 | 474.834 | 474.88 | 0.046 | 0.002116 |
| 105696 | 1426579 | 3941123 | 487.945 | 487.99 | 0.046 | 0.002116 |
| 100587 | 1346142 | 3961856 | 436.843 | 436.89 | 0.047 | 0.002209 |
| 101774 | 1358375 | 3971215 | 439.523 | 439.57 | 0.047 | 0.002209 |
| 106193 | 1421235 | 3967804 | 469.143 | 469.19 | 0.047 | 0.002209 |
| 106122 | 1420877 | 3963990 | 472.063 | 472.11 | 0.047 | 0.002209 |
| 106927 | 1420741 | 3958455 | 473.243 | 473.29 | 0.047 | 0.002209 |
| 106694 | 1421848 | 3974417 | 481.163 | 481.21 | 0.047 | 0.002209 |
| 105724 | 1424984 | 3941666 | 486.113 | 486.16 | 0.047 | 0.002209 |
| 105456 | 1429148 | 3932117 | 495.063 | 495.11 | 0.047 | 0.002209 |
| 101030 | 1334000 | 3947676 | 558.133 | 558.18 | 0.047 | 0.002209 |
| 100878 | 1338461 | 3952052 | 432.572 | 432.62 | 0.048 | 0.002304 |
| 100899 | 1337662 | 3951696 | 432.892 | 432.94 | 0.048 | 0.002304 |
| 101151 | 1336178 | 3950372 | 432.932 | 432.98 | 0.048 | 0.002304 |
| 100839 | 1339947 | 3953001 | 433.172 | 433.22 | 0.048 | 0.002304 |
| 103807 | 1373792 | 3958302 | 444.782 | 444.83 | 0.048 | 0.002304 |
| 100386 | 1351691 | 3969103 | 451.162 | 451.21 | 0.048 | 0.002304 |
| 104376 | 1373710 | 3950393 | 453.522 | 453.57 | 0.048 | 0.002304 |
| 100503 | 1347844 | 3965048 | 454.022 | 454.07 | 0.048 | 0.002304 |
| 103613 | 1375038 | 3965926 | 455.122 | 455.17 | 0.048 | 0.002304 |
| 106137 | 1420894 | 3964665 | 470.392 | 470.44 | 0.048 | 0.002304 |
| 105851 | 1423070 | 3947675 | 477.183 | 477.23 | 0.048 | 0.002304 |
| 105600 | 1430127 | 3938054 | 490.902 | 490.95 | 0.048 | 0.002304 |
| 101262 | 1341807 | 3955108 | 432.911 | 432.96 | 0.049 | 0.002401 |
| 100768 | 1341981 | 3955329 | 433.181 | 433.23 | 0.049 | 0.002401 |
| 100862 | 1339135 | 3952359 | 434.411 | 434.46 | 0.049 | 0.002401 |
| 100132 | 1358210 | 3963360 | 435.211 | 435.26 | 0.049 | 0.002401 |
| 101618 | 1353230 | 3969028 | 445.141 | 445.19 | 0.049 | 0.002401 |
| 103948 | 1373736 | 3951588 | 446.151 | 446.2  | 0.049 | 0.002401 |
| 104097 | 1373164 | 3948542 | 451.881 | 451.93 | 0.049 | 0.002401 |
| 107634 | 1395872 | 3955602 | 457.541 | 457.59 | 0.049 | 0.002401 |
| 107534 | 1398458 | 3959729 | 457.721 | 457.77 | 0.049 | 0.002401 |
| 107657 | 1395504 | 3954347 | 458.061 | 458.11 | 0.049 | 0.002401 |
| 106852 | 1420887 | 3965013 | 470.321 | 470.37 | 0.049 | 0.002401 |
| 106883 | 1420850 | 3963411 | 473.701 | 473.75 | 0.049 | 0.002401 |
| 101187 | 1337349 | 3951495 | 432.81  | 432.86 | 0.05  | 0.0025   |
| 100864 | 1339054 | 3952317 | 434.09  | 434.14 | 0.05  | 0.0025   |
| 100143 | 1358212 | 3963714 | 434.81  | 434.86 | 0.05  | 0.0025   |
| 100030 | 1357123 | 3959726 | 435.84  | 435.89 | 0.05  | 0.0025   |
| 100626 | 1345343 | 3960439 | 437.13  | 437.18 | 0.05  | 0.0025   |
| 103830 | 1373867 | 3956707 | 445.87  | 445.92 | 0.05  | 0.0025   |
| 103659 | 1374920 | 3963980 | 446.02  | 446.07 | 0.05  | 0.0025   |
| 101606 | 1352718 | 3969049 | 446.36  | 446.41 | 0.05  | 0.0025   |
| 103670 | 1374823 | 3963570 | 447.43  | 447.48 | 0.05  | 0.0025   |
| 103707 | 1374105 | 3962094 | 449.51  | 449.56 | 0.05  | 0.0025   |
| 107521 | 1399112 | 3960020 | 458.58  | 458.63 | 0.05  | 0.0025   |
| 100436 | 1349262 | 3967590 | 459.89  | 459.94 | 0.05  | 0.0025   |

|        |         |         |         |        |       |          |
|--------|---------|---------|---------|--------|-------|----------|
| 105990 | 1420329 | 3954127 | 474.51  | 474.56 | 0.05  | 0.0025   |
| 106945 | 1420725 | 3957637 | 474.91  | 474.96 | 0.05  | 0.0025   |
| 106995 | 1420672 | 3955302 | 475.279 | 475.33 | 0.05  | 0.0025   |
| 105966 | 1420862 | 3953444 | 475.35  | 475.4  | 0.05  | 0.0025   |
| 106000 | 1420590 | 3954769 | 475.65  | 475.7  | 0.05  | 0.0025   |
| 105928 | 1421556 | 3951601 | 476.8   | 476.85 | 0.05  | 0.0025   |
| 5547   | 1389342 | 4006191 | 747.67  | 747.72 | 0.05  | 0.0025   |
| 101180 | 1337059 | 3951271 | 433.099 | 433.15 | 0.051 | 0.002601 |
| 103568 | 1376288 | 3968249 | 446.339 | 446.39 | 0.051 | 0.002601 |
| 103449 | 1379602 | 3971548 | 450.249 | 450.3  | 0.051 | 0.002601 |
| 103437 | 1379602 | 3971860 | 452.229 | 452.28 | 0.051 | 0.002601 |
| 107539 | 1398233 | 3959624 | 457.649 | 457.7  | 0.051 | 0.002601 |
| 101543 | 1349555 | 3968028 | 458.519 | 458.57 | 0.051 | 0.002601 |
| 106836 | 1420901 | 3965811 | 471.779 | 471.83 | 0.051 | 0.002601 |
| 106090 | 1420773 | 3959365 | 474.729 | 474.78 | 0.051 | 0.002601 |
| 106035 | 1420721 | 3956529 | 474.979 | 475.03 | 0.051 | 0.002601 |
| 105848 | 1423148 | 3947572 | 476.919 | 476.97 | 0.051 | 0.002601 |
| 106695 | 1421847 | 3974330 | 480.719 | 480.77 | 0.051 | 0.002601 |
| 5537   | 1388968 | 4005811 | 742.589 | 742.64 | 0.051 | 0.002601 |
| 101240 | 1340496 | 3953608 | 432.798 | 432.85 | 0.052 | 0.002704 |
| 100779 | 1341669 | 3954972 | 433.078 | 433.13 | 0.052 | 0.002704 |
| 100662 | 1344604 | 3959111 | 436.808 | 436.86 | 0.052 | 0.002704 |
| 100167 | 1358237 | 3964685 | 437.238 | 437.29 | 0.052 | 0.002704 |
| 103669 | 1374834 | 3963602 | 447.338 | 447.39 | 0.052 | 0.002704 |
| 103686 | 1374535 | 3963004 | 448.618 | 448.67 | 0.052 | 0.002704 |
| 105705 | 1426107 | 3941324 | 486.758 | 486.81 | 0.052 | 0.002704 |
| 101864 | 1357043 | 3974746 | 493.468 | 493.52 | 0.052 | 0.002704 |
| 5530   | 1388703 | 4005543 | 739.068 | 739.12 | 0.052 | 0.002704 |
| 100709 | 1343641 | 3957392 | 433.437 | 433.49 | 0.053 | 0.002809 |
| 100035 | 1357242 | 3959786 | 436.157 | 436.21 | 0.053 | 0.002809 |
| 101355 | 1345036 | 3959855 | 436.847 | 436.9  | 0.053 | 0.002809 |
| 100645 | 1344977 | 3959779 | 436.867 | 436.92 | 0.053 | 0.002809 |
| 101383 | 1345631 | 3960908 | 436.917 | 436.97 | 0.053 | 0.002809 |
| 100576 | 1346375 | 3962275 | 436.917 | 436.97 | 0.053 | 0.002809 |
| 100242 | 1358343 | 3968568 | 436.957 | 437.01 | 0.053 | 0.002809 |
| 101749 | 1358369 | 3970184 | 439.787 | 439.84 | 0.053 | 0.002809 |
| 103584 | 1375872 | 3967714 | 443.197 | 443.25 | 0.053 | 0.002809 |
| 104187 | 1372439 | 3947279 | 451.117 | 451.17 | 0.053 | 0.002809 |
| 103615 | 1375027 | 3965833 | 453.238 | 453.29 | 0.053 | 0.002809 |
| 101547 | 1349645 | 3968171 | 457.657 | 457.71 | 0.053 | 0.002809 |
| 107549 | 1397730 | 3959393 | 457.967 | 458.02 | 0.053 | 0.002809 |
| 107585 | 1396570 | 3958012 | 459.467 | 459.52 | 0.053 | 0.002809 |
| 107458 | 1402143 | 3961290 | 460.857 | 460.91 | 0.053 | 0.002809 |
| 106154 | 1420908 | 3965406 | 470.387 | 470.44 | 0.053 | 0.002809 |
| 106839 | 1420897 | 3965659 | 471.157 | 471.21 | 0.053 | 0.002809 |
| 106082 | 1420765 | 3958955 | 473.158 | 473.21 | 0.053 | 0.002809 |
| 106970 | 1420701 | 3956522 | 475.057 | 475.11 | 0.053 | 0.002809 |
| 106689 | 1421853 | 3974671 | 482.337 | 482.39 | 0.053 | 0.002809 |
| 101854 | 1357401 | 3974367 | 485.867 | 485.92 | 0.053 | 0.002809 |
| 101182 | 1337129 | 3951330 | 432.896 | 432.95 | 0.054 | 0.002916 |
| 100034 | 1357222 | 3959776 | 436.076 | 436.13 | 0.054 | 0.002916 |
| 101317 | 1344139 | 3958253 | 436.156 | 436.21 | 0.054 | 0.002916 |

|        |         |         |         |        |       |          |
|--------|---------|---------|---------|--------|-------|----------|
| 101339 | 1344612 | 3959096 | 436.746 | 436.8  | 0.054 | 0.002916 |
| 100419 | 1349650 | 3968253 | 459.426 | 459.48 | 0.054 | 0.002916 |
| 107671 | 1395293 | 3953633 | 460.296 | 460.35 | 0.054 | 0.002916 |
| 106042 | 1420729 | 3956876 | 474.816 | 474.87 | 0.054 | 0.002916 |
| 105971 | 1420727 | 3953620 | 475.286 | 475.34 | 0.054 | 0.002916 |
| 105721 | 1425171 | 3941606 | 485.706 | 485.76 | 0.054 | 0.002916 |
| 105454 | 1429153 | 3932048 | 494.926 | 494.98 | 0.054 | 0.002916 |
| 100734 | 1342992 | 3956487 | 433.055 | 433.11 | 0.055 | 0.003025 |
| 101145 | 1335956 | 3950140 | 433.665 | 433.72 | 0.055 | 0.003025 |
| 100582 | 1346253 | 3962054 | 436.875 | 436.93 | 0.055 | 0.003025 |
| 100673 | 1344376 | 3958704 | 436.905 | 436.96 | 0.055 | 0.003025 |
| 100527 | 1347322 | 3964114 | 441.965 | 442.02 | 0.055 | 0.003025 |
| 103648 | 1374947 | 3964395 | 444.915 | 444.97 | 0.055 | 0.003025 |
| 103908 | 1373783 | 3953132 | 447.125 | 447.18 | 0.055 | 0.003025 |
| 104488 | 1373806 | 3953462 | 447.485 | 447.54 | 0.055 | 0.003025 |
| 103534 | 1377451 | 3969074 | 447.695 | 447.75 | 0.055 | 0.003025 |
| 100509 | 1347715 | 3964817 | 453.345 | 453.4  | 0.055 | 0.003025 |
| 100480 | 1348326 | 3965914 | 456.535 | 456.59 | 0.055 | 0.003025 |
| 100437 | 1349241 | 3967551 | 459.885 | 459.94 | 0.055 | 0.003025 |
| 106898 | 1420766 | 3959917 | 474.905 | 474.96 | 0.055 | 0.003025 |
| 106966 | 1420704 | 3956687 | 474.995 | 475.05 | 0.055 | 0.003025 |
| 105489 | 1429249 | 3933345 | 493.975 | 494.03 | 0.055 | 0.003025 |
| 101066 | 1333630 | 3947447 | 544.375 | 544.43 | 0.055 | 0.003025 |
| 100906 | 1337404 | 3951549 | 433.324 | 433.38 | 0.056 | 0.003136 |
| 100085 | 1358152 | 3961468 | 435.104 | 435.16 | 0.056 | 0.003136 |
| 100208 | 1358299 | 3967090 | 435.784 | 435.84 | 0.056 | 0.003136 |
| 101377 | 1345513 | 3960697 | 436.834 | 436.89 | 0.056 | 0.003136 |
| 100640 | 1345078 | 3959963 | 436.884 | 436.94 | 0.056 | 0.003136 |
| 101341 | 1344655 | 3959173 | 437.024 | 437.08 | 0.056 | 0.003136 |
| 103727 | 1374038 | 3961157 | 446.114 | 446.17 | 0.056 | 0.003136 |
| 104142 | 1372757 | 3947828 | 451.144 | 451.2  | 0.056 | 0.003136 |
| 104007 | 1373685 | 3950163 | 453.524 | 453.58 | 0.056 | 0.003136 |
| 106210 | 1421637 | 3968534 | 465.174 | 465.23 | 0.056 | 0.003136 |
| 106004 | 1420633 | 3954941 | 475.864 | 475.92 | 0.056 | 0.003136 |
| 106307 | 1421845 | 3973331 | 476.194 | 476.25 | 0.056 | 0.003136 |
| 105477 | 1429140 | 3933025 | 495.194 | 495.25 | 0.056 | 0.003136 |
| 105444 | 1429146 | 3931570 | 496.264 | 496.32 | 0.056 | 0.003136 |
| 101051 | 1333171 | 3947175 | 549.774 | 549.83 | 0.056 | 0.003136 |
| 101364 | 1345231 | 3960203 | 436.963 | 437.02 | 0.057 | 0.003249 |
| 101365 | 1345252 | 3960240 | 436.973 | 437.03 | 0.057 | 0.003249 |
| 103757 | 1373839 | 3960104 | 444.183 | 444.24 | 0.057 | 0.003249 |
| 103532 | 1377501 | 3969107 | 447.753 | 447.81 | 0.057 | 0.003249 |
| 103444 | 1379602 | 3971703 | 450.753 | 450.81 | 0.057 | 0.003249 |
| 107650 | 1395622 | 3954750 | 458.183 | 458.24 | 0.057 | 0.003249 |
| 107592 | 1396470 | 3957673 | 458.613 | 458.67 | 0.057 | 0.003249 |
| 107558 | 1397326 | 3959161 | 458.893 | 458.95 | 0.057 | 0.003249 |
| 105893 | 1422117 | 3949818 | 474.153 | 474.21 | 0.057 | 0.003249 |
| 106956 | 1420716 | 3957125 | 474.923 | 474.98 | 0.057 | 0.003249 |
| 101059 | 1333405 | 3947316 | 540.623 | 540.68 | 0.057 | 0.003249 |
| 101080 | 1334158 | 3947753 | 563.713 | 563.77 | 0.057 | 0.003249 |
| 100883 | 1338262 | 3951965 | 432.592 | 432.65 | 0.058 | 0.003364 |
| 100765 | 1342067 | 3955427 | 433.302 | 433.36 | 0.058 | 0.003364 |



|        |         |         |         |        |       |          |
|--------|---------|---------|---------|--------|-------|----------|
| 101138 | 1335733 | 3949909 | 435.032 | 435.09 | 0.058 | 0.003364 |
| 101320 | 1344218 | 3958395 | 436.602 | 436.66 | 0.058 | 0.003364 |
| 100250 | 1358342 | 3968768 | 437.332 | 437.39 | 0.058 | 0.003364 |
| 104458 | 1373765 | 3952243 | 446.052 | 446.11 | 0.058 | 0.003364 |
| 103944 | 1373738 | 3951710 | 446.432 | 446.49 | 0.058 | 0.003364 |
| 104502 | 1373824 | 3954162 | 447.212 | 447.27 | 0.058 | 0.003364 |
| 103527 | 1377615 | 3969181 | 447.793 | 447.85 | 0.058 | 0.003364 |
| 107499 | 1400235 | 3960535 | 459.802 | 459.86 | 0.058 | 0.003364 |
| 106195 | 1421272 | 3967866 | 468.362 | 468.42 | 0.058 | 0.003364 |
| 106053 | 1420739 | 3957427 | 474.762 | 474.82 | 0.058 | 0.003364 |
| 106054 | 1420740 | 3957468 | 474.832 | 474.89 | 0.058 | 0.003364 |
| 106980 | 1420694 | 3956040 | 475.462 | 475.52 | 0.058 | 0.003364 |
| 105801 | 1424078 | 3945508 | 476.612 | 476.67 | 0.058 | 0.003364 |
| 100876 | 1338542 | 3952089 | 432.801 | 432.86 | 0.059 | 0.003481 |
| 101725 | 1358159 | 3968891 | 436.961 | 437.02 | 0.059 | 0.003481 |
| 101374 | 1345456 | 3960601 | 436.991 | 437.05 | 0.059 | 0.003481 |
| 103942 | 1373740 | 3951773 | 446.391 | 446.45 | 0.059 | 0.003481 |
| 101534 | 1349391 | 3967740 | 459.411 | 459.47 | 0.059 | 0.003481 |
| 105604 | 1429996 | 3938222 | 491.101 | 491.16 | 0.059 | 0.003481 |
| 105442 | 1429145 | 3931496 | 496.291 | 496.35 | 0.059 | 0.003481 |
| 105443 | 1429145 | 3931533 | 496.361 | 496.42 | 0.059 | 0.003481 |
| 100736 | 1342934 | 3956421 | 433.01  | 433.07 | 0.06  | 0.0036   |
| 100080 | 1358147 | 3961251 | 435.7   | 435.76 | 0.06  | 0.0036   |
| 100221 | 1358314 | 3967667 | 436.08  | 436.14 | 0.06  | 0.0036   |
| 103640 | 1374964 | 3964719 | 445.59  | 445.65 | 0.06  | 0.0036   |
| 100520 | 1347477 | 3964392 | 448.15  | 448.21 | 0.06  | 0.0036   |
| 101586 | 1351826 | 3969069 | 450.78  | 450.84 | 0.06  | 0.0036   |
| 104370 | 1373704 | 3950271 | 453.6   | 453.66 | 0.06  | 0.0036   |
| 101123 | 1335235 | 3949396 | 458.61  | 458.67 | 0.06  | 0.0036   |
| 107000 | 1420644 | 3955073 | 475.35  | 475.41 | 0.06  | 0.0036   |
| 105850 | 1423096 | 3947641 | 476.99  | 477.05 | 0.06  | 0.0036   |
| 100782 | 1341585 | 3954876 | 432.889 | 432.95 | 0.061 | 0.003721 |
| 100694 | 1343955 | 3957950 | 435.149 | 435.21 | 0.061 | 0.003721 |
| 103563 | 1376444 | 3968398 | 446.189 | 446.25 | 0.061 | 0.003721 |
| 104094 | 1373193 | 3948594 | 451.919 | 451.98 | 0.061 | 0.003721 |
| 106158 | 1420912 | 3965586 | 470.609 | 470.67 | 0.061 | 0.003721 |
| 106181 | 1421025 | 3967361 | 470.629 | 470.69 | 0.061 | 0.003721 |
| 105997 | 1420563 | 3954676 | 475.659 | 475.72 | 0.061 | 0.003721 |
| 106692 | 1421850 | 3974502 | 481.909 | 481.97 | 0.061 | 0.003721 |
| 105674 | 1427562 | 3940379 | 487.789 | 487.85 | 0.061 | 0.003721 |
| 100828 | 1340274 | 3953375 | 432.918 | 432.98 | 0.062 | 0.003844 |
| 101323 | 1344278 | 3958501 | 436.728 | 436.79 | 0.062 | 0.003844 |
| 101378 | 1345531 | 3960728 | 436.878 | 436.94 | 0.062 | 0.003844 |
| 103724 | 1374040 | 3961282 | 446.218 | 446.28 | 0.062 | 0.003844 |
| 100475 | 1348429 | 3966098 | 457.029 | 457.09 | 0.062 | 0.003844 |
| 107489 | 1400678 | 3960730 | 460.468 | 460.53 | 0.062 | 0.003844 |
| 107679 | 1395117 | 3953232 | 462.268 | 462.33 | 0.062 | 0.003844 |
| 106936 | 1420733 | 3958045 | 474.398 | 474.46 | 0.062 | 0.003844 |
| 105812 | 1423981 | 3946076 | 475.648 | 475.71 | 0.062 | 0.003844 |
| 105687 | 1427049 | 3940808 | 488.298 | 488.36 | 0.062 | 0.003844 |
| 100888 | 1338073 | 3951882 | 432.507 | 432.57 | 0.063 | 0.003969 |
| 101245 | 1340711 | 3953856 | 433.097 | 433.16 | 0.063 | 0.003969 |

|        |         |         |         |        |       |          |
|--------|---------|---------|---------|--------|-------|----------|
| 100528 | 1347299 | 3964074 | 441.307 | 441.37 | 0.063 | 0.003969 |
| 103556 | 1376686 | 3968580 | 445.868 | 445.93 | 0.063 | 0.003969 |
| 103554 | 1376759 | 3968627 | 446.017 | 446.08 | 0.063 | 0.003969 |
| 103514 | 1377985 | 3969423 | 449.117 | 449.18 | 0.063 | 0.003969 |
| 103508 | 1378168 | 3969547 | 450.487 | 450.55 | 0.063 | 0.003969 |
| 104011 | 1373683 | 3950088 | 453.577 | 453.64 | 0.063 | 0.003969 |
| 107449 | 1402635 | 3961428 | 461.277 | 461.34 | 0.063 | 0.003969 |
| 107687 | 1394861 | 3952933 | 463.238 | 463.3  | 0.063 | 0.003969 |
| 106120 | 1420875 | 3963880 | 472.397 | 472.46 | 0.063 | 0.003969 |
| 105899 | 1422030 | 3950099 | 474.197 | 474.26 | 0.063 | 0.003969 |
| 106322 | 1421861 | 3974111 | 479.667 | 479.73 | 0.063 | 0.003969 |
| 100884 | 1338223 | 3951948 | 432.526 | 432.59 | 0.064 | 0.004096 |
| 100689 | 1344054 | 3958128 | 435.866 | 435.93 | 0.064 | 0.004096 |
| 100112 | 1358184 | 3962635 | 436.376 | 436.44 | 0.064 | 0.004096 |
| 100636 | 1345155 | 3960104 | 436.736 | 436.8  | 0.064 | 0.004096 |
| 101338 | 1344590 | 3959058 | 436.746 | 436.81 | 0.064 | 0.004096 |
| 100647 | 1344934 | 3959702 | 436.926 | 436.99 | 0.064 | 0.004096 |
| 104426 | 1373744 | 3951446 | 446.626 | 446.69 | 0.064 | 0.004096 |
| 100377 | 1352072 | 3969085 | 450.636 | 450.7  | 0.064 | 0.004096 |
| 104385 | 1373720 | 3950566 | 454.156 | 454.22 | 0.064 | 0.004096 |
| 106128 | 1420883 | 3964239 | 471.166 | 471.23 | 0.064 | 0.004096 |
| 105873 | 1422447 | 3948774 | 477.936 | 478    | 0.064 | 0.004096 |
| 105634 | 1429018 | 3939114 | 490.166 | 490.23 | 0.064 | 0.004096 |
| 101284 | 1342865 | 3956319 | 433.005 | 433.07 | 0.065 | 0.004225 |
| 100684 | 1344152 | 3958304 | 436.305 | 436.37 | 0.065 | 0.004225 |
| 101403 | 1346045 | 3961648 | 436.775 | 436.84 | 0.065 | 0.004225 |
| 101416 | 1346363 | 3962218 | 436.925 | 436.99 | 0.065 | 0.004225 |
| 100558 | 1346707 | 3962925 | 437.125 | 437.19 | 0.065 | 0.004225 |
| 101764 | 1358387 | 3970811 | 438.815 | 438.88 | 0.065 | 0.004225 |
| 101128 | 1335387 | 3949554 | 444.845 | 444.91 | 0.065 | 0.004225 |
| 103728 | 1374037 | 3961115 | 446.065 | 446.13 | 0.065 | 0.004225 |
| 104443 | 1373753 | 3951824 | 446.265 | 446.33 | 0.065 | 0.004225 |
| 101605 | 1352673 | 3969050 | 446.705 | 446.77 | 0.065 | 0.004225 |
| 103620 | 1375011 | 3965590 | 447.705 | 447.77 | 0.065 | 0.004225 |
| 103691 | 1374420 | 3962801 | 448.515 | 448.58 | 0.065 | 0.004225 |
| 104353 | 1373692 | 3949912 | 453.945 | 454.01 | 0.065 | 0.004225 |
| 107620 | 1396083 | 3956318 | 456.855 | 456.92 | 0.065 | 0.004225 |
| 107571 | 1396859 | 3958682 | 460.035 | 460.1  | 0.065 | 0.004225 |
| 106225 | 1421777 | 3969766 | 472.735 | 472.8  | 0.065 | 0.004225 |
| 106015 | 1420700 | 3955511 | 475.585 | 475.65 | 0.065 | 0.004225 |
| 105686 | 1427085 | 3940779 | 488.075 | 488.14 | 0.065 | 0.004225 |
| 105484 | 1429206 | 3933220 | 494.355 | 494.42 | 0.065 | 0.004225 |
| 100800 | 1341083 | 3954302 | 432.804 | 432.87 | 0.066 | 0.004356 |
| 100832 | 1340158 | 3953241 | 432.864 | 432.93 | 0.066 | 0.004356 |
| 100623 | 1345396 | 3960535 | 436.844 | 436.91 | 0.066 | 0.004356 |
| 101763 | 1358386 | 3970770 | 438.984 | 439.05 | 0.066 | 0.004356 |
| 101797 | 1358379 | 3972170 | 442.934 | 443    | 0.066 | 0.004356 |
| 101614 | 1353075 | 3969034 | 444.704 | 444.77 | 0.066 | 0.004356 |
| 104442 | 1373752 | 3951796 | 446.374 | 446.44 | 0.066 | 0.004356 |
| 103710 | 1374075 | 3961947 | 449.274 | 449.34 | 0.066 | 0.004356 |
| 104224 | 1372725 | 3947749 | 451.144 | 451.21 | 0.066 | 0.004356 |
| 104356 | 1373694 | 3949978 | 453.814 | 453.88 | 0.066 | 0.004356 |

|        |         |         |         |        |       |          |
|--------|---------|---------|---------|--------|-------|----------|
| 107628 | 1395968 | 3955925 | 456.614 | 456.68 | 0.066 | 0.004356 |
| 101497 | 1348500 | 3966148 | 457.264 | 457.33 | 0.066 | 0.004356 |
| 101835 | 1357987 | 3973869 | 465.624 | 465.69 | 0.066 | 0.004356 |
| 106857 | 1420882 | 3964767 | 470.354 | 470.42 | 0.066 | 0.004356 |
| 106886 | 1420847 | 3963294 | 473.904 | 473.97 | 0.066 | 0.004356 |
| 106018 | 1420705 | 3955673 | 475.274 | 475.34 | 0.066 | 0.004356 |
| 101186 | 1337274 | 3951442 | 432.743 | 432.81 | 0.067 | 0.004489 |
| 104514 | 1373838 | 3954755 | 446.243 | 446.31 | 0.067 | 0.004489 |
| 103882 | 1373813 | 3954239 | 447.173 | 447.24 | 0.067 | 0.004489 |
| 104377 | 1373711 | 3950414 | 453.513 | 453.58 | 0.067 | 0.004489 |
| 103999 | 1373689 | 3950321 | 453.523 | 453.59 | 0.067 | 0.004489 |
| 103985 | 1373710 | 3950610 | 453.553 | 453.62 | 0.067 | 0.004489 |
| 107580 | 1396658 | 3958292 | 460.583 | 460.65 | 0.067 | 0.004489 |
| 106938 | 1420732 | 3957970 | 474.633 | 474.7  | 0.067 | 0.004489 |
| 105845 | 1423251 | 3947435 | 476.583 | 476.65 | 0.067 | 0.004489 |
| 106702 | 1421841 | 3973983 | 479.003 | 479.07 | 0.067 | 0.004489 |
| 106693 | 1421849 | 3974460 | 481.693 | 481.76 | 0.067 | 0.004489 |
| 101852 | 1357466 | 3974314 | 484.443 | 484.51 | 0.067 | 0.004489 |
| 101414 | 1346321 | 3962141 | 436.862 | 436.93 | 0.068 | 0.004624 |
| 107551 | 1397654 | 3959357 | 458.422 | 458.49 | 0.068 | 0.004624 |
| 107472 | 1401479 | 3961037 | 460.282 | 460.35 | 0.068 | 0.004624 |
| 106188 | 1421117 | 3967589 | 470.372 | 470.44 | 0.068 | 0.004624 |
| 106877 | 1420857 | 3963729 | 473.062 | 473.13 | 0.068 | 0.004624 |
| 106705 | 1421839 | 3973813 | 478.492 | 478.56 | 0.068 | 0.004624 |
| 101855 | 1357367 | 3974393 | 486.512 | 486.58 | 0.068 | 0.004624 |
| 101113 | 1334924 | 3949067 | 497.502 | 497.57 | 0.068 | 0.004624 |
| 101276 | 1342187 | 3955545 | 432.961 | 433.03 | 0.069 | 0.004761 |
| 100179 | 1358268 | 3965845 | 436.841 | 436.91 | 0.069 | 0.004761 |
| 101771 | 1358387 | 3971037 | 438.741 | 438.81 | 0.069 | 0.004761 |
| 103709 | 1374084 | 3961995 | 449.371 | 449.44 | 0.069 | 0.004761 |
| 107536 | 1398382 | 3959694 | 457.721 | 457.79 | 0.069 | 0.004761 |
| 106012 | 1420695 | 3955393 | 475.741 | 475.81 | 0.069 | 0.004761 |
| 105805 | 1424052 | 3945723 | 476.151 | 476.22 | 0.069 | 0.004761 |
| 100803 | 1340997 | 3954203 | 432.7   | 432.77 | 0.07  | 0.0049   |
| 101219 | 1338972 | 3952264 | 434.3   | 434.37 | 0.07  | 0.0049   |
| 101351 | 1344875 | 3959568 | 437.09  | 437.16 | 0.07  | 0.0049   |
| 104111 | 1373035 | 3948312 | 451.88  | 451.95 | 0.07  | 0.0049   |
| 104025 | 1373677 | 3949824 | 453.68  | 453.75 | 0.07  | 0.0049   |
| 107607 | 1396261 | 3956919 | 456.29  | 456.36 | 0.07  | 0.0049   |
| 106233 | 1421786 | 3970118 | 471.95  | 472.02 | 0.07  | 0.0049   |
| 106165 | 1420917 | 3965904 | 472.23  | 472.3  | 0.07  | 0.0049   |
| 106021 | 1420708 | 3955838 | 475.18  | 475.25 | 0.07  | 0.0049   |
| 105980 | 1420400 | 3953916 | 475.41  | 475.48 | 0.07  | 0.0049   |
| 106979 | 1420695 | 3956080 | 475.42  | 475.49 | 0.07  | 0.0049   |
| 106302 | 1421840 | 3973030 | 475.6   | 475.67 | 0.07  | 0.0049   |
| 105713 | 1425647 | 3941465 | 485.58  | 485.65 | 0.07  | 0.0049   |
| 105673 | 1427589 | 3940355 | 487.88  | 487.95 | 0.07  | 0.0049   |
| 105464 | 1429094 | 3932463 | 495.69  | 495.76 | 0.07  | 0.0049   |
| 101067 | 1333665 | 3947468 | 545.57  | 545.64 | 0.07  | 0.0049   |
| 100829 | 1340245 | 3953342 | 432.839 | 432.91 | 0.071 | 0.005041 |
| 100874 | 1338626 | 3952125 | 432.929 | 433    | 0.071 | 0.005041 |
| 100606 | 1345733 | 3961125 | 436.859 | 436.93 | 0.071 | 0.005041 |

|        |         |         |         |        |       |          |
|--------|---------|---------|---------|--------|-------|----------|
| 103968 | 1373727 | 3951024 | 446.279 | 446.35 | 0.071 | 0.005041 |
| 103399 | 1379603 | 3972914 | 460.469 | 460.54 | 0.071 | 0.005041 |
| 107579 | 1396673 | 3958330 | 460.549 | 460.62 | 0.071 | 0.005041 |
| 106761 | 1421784 | 3971000 | 470.309 | 470.38 | 0.071 | 0.005041 |
| 106889 | 1420844 | 3963180 | 473.779 | 473.85 | 0.071 | 0.005041 |
| 105840 | 1423392 | 3947247 | 476.359 | 476.43 | 0.071 | 0.005041 |
| 105697 | 1426539 | 3941145 | 487.859 | 487.93 | 0.071 | 0.005041 |
| 101043 | 1333446 | 3947353 | 540.409 | 540.48 | 0.071 | 0.005041 |
| 100798 | 1341140 | 3954367 | 432.988 | 433.06 | 0.072 | 0.005184 |
| 100632 | 1345231 | 3960242 | 436.678 | 436.75 | 0.072 | 0.005184 |
| 100570 | 1346475 | 3962460 | 436.738 | 436.81 | 0.072 | 0.005184 |
| 101439 | 1347005 | 3963464 | 439.378 | 439.45 | 0.072 | 0.005184 |
| 103876 | 1373820 | 3954557 | 446.618 | 446.69 | 0.072 | 0.005184 |
| 106207 | 1421571 | 3968382 | 464.008 | 464.08 | 0.072 | 0.005184 |
| 106148 | 1420903 | 3965121 | 470.688 | 470.76 | 0.072 | 0.005184 |
| 105961 | 1420998 | 3953223 | 475.428 | 475.5  | 0.072 | 0.005184 |
| 106010 | 1420686 | 3955277 | 475.688 | 475.76 | 0.072 | 0.005184 |
| 105910 | 1421852 | 3950684 | 476.918 | 476.99 | 0.072 | 0.005184 |
| 105452 | 1429155 | 3931942 | 495.348 | 495.42 | 0.072 | 0.005184 |
| 105404 | 1429174 | 3930359 | 496.968 | 497.04 | 0.072 | 0.005184 |
| 101230 | 1340222 | 3953296 | 432.757 | 432.83 | 0.073 | 0.005329 |
| 100778 | 1341697 | 3955004 | 433.117 | 433.19 | 0.073 | 0.005329 |
| 100691 | 1344015 | 3958057 | 435.577 | 435.65 | 0.073 | 0.005329 |
| 101747 | 1358367 | 3970103 | 438.797 | 438.87 | 0.073 | 0.005329 |
| 103642 | 1374960 | 3964636 | 445.297 | 445.37 | 0.073 | 0.005329 |
| 104429 | 1373745 | 3951507 | 446.437 | 446.51 | 0.073 | 0.005329 |
| 107674 | 1395235 | 3953465 | 461.387 | 461.46 | 0.073 | 0.005329 |
| 106947 | 1420723 | 3957530 | 474.857 | 474.93 | 0.073 | 0.005329 |
| 106948 | 1420723 | 3957494 | 474.907 | 474.98 | 0.073 | 0.005329 |
| 105682 | 1427259 | 3940633 | 487.687 | 487.76 | 0.073 | 0.005329 |
| 101199 | 1337806 | 3951745 | 432.416 | 432.49 | 0.074 | 0.005476 |
| 101310 | 1344001 | 3958008 | 435.286 | 435.36 | 0.074 | 0.005476 |
| 103509 | 1378134 | 3969524 | 450.166 | 450.24 | 0.074 | 0.005476 |
| 104387 | 1373722 | 3950604 | 453.916 | 453.99 | 0.074 | 0.005476 |
| 101849 | 1357562 | 3974236 | 482.026 | 482.1  | 0.074 | 0.005476 |
| 105666 | 1427847 | 3940130 | 488.296 | 488.37 | 0.074 | 0.005476 |
| 100789 | 1341390 | 3954653 | 432.745 | 432.82 | 0.075 | 0.005625 |
| 100660 | 1344646 | 3959187 | 437.205 | 437.28 | 0.075 | 0.005625 |
| 101498 | 1348541 | 3966220 | 457.365 | 457.44 | 0.075 | 0.005625 |
| 107675 | 1395218 | 3953425 | 461.615 | 461.69 | 0.075 | 0.005625 |
| 106806 | 1421024 | 3967413 | 471.046 | 471.12 | 0.075 | 0.005625 |
| 105898 | 1422042 | 3950058 | 474.055 | 474.13 | 0.075 | 0.005625 |
| 101033 | 1333890 | 3947612 | 554.155 | 554.23 | 0.075 | 0.005625 |
| 101218 | 1338566 | 3952084 | 432.814 | 432.89 | 0.076 | 0.005776 |
| 100726 | 1343217 | 3956761 | 433.134 | 433.21 | 0.076 | 0.005776 |
| 101309 | 1343981 | 3957972 | 435.184 | 435.26 | 0.076 | 0.005776 |
| 100204 | 1358295 | 3966909 | 436.494 | 436.57 | 0.076 | 0.005776 |
| 100637 | 1345136 | 3960069 | 436.854 | 436.93 | 0.076 | 0.005776 |
| 100066 | 1358124 | 3960637 | 436.894 | 436.97 | 0.076 | 0.005776 |
| 100574 | 1346412 | 3962342 | 437.024 | 437.1  | 0.076 | 0.005776 |
| 100443 | 1349111 | 3967317 | 460.414 | 460.49 | 0.076 | 0.005776 |
| 106006 | 1420661 | 3955088 | 475.904 | 475.98 | 0.076 | 0.005776 |

|        |         |         |         |        |       |          |
|--------|---------|---------|---------|--------|-------|----------|
| 106316 | 1421856 | 3973805 | 478.374 | 478.45 | 0.076 | 0.005776 |
| 101194 | 1337618 | 3951653 | 432.394 | 432.47 | 0.077 | 0.005929 |
| 100912 | 1337193 | 3951399 | 433.403 | 433.48 | 0.077 | 0.005929 |
| 100630 | 1345270 | 3960310 | 436.783 | 436.86 | 0.077 | 0.005929 |
| 100671 | 1344418 | 3958777 | 436.863 | 436.94 | 0.077 | 0.005929 |
| 100579 | 1346316 | 3962167 | 436.893 | 436.97 | 0.077 | 0.005929 |
| 100674 | 1344355 | 3958668 | 436.903 | 436.98 | 0.077 | 0.005929 |
| 103513 | 1378012 | 3969442 | 449.353 | 449.43 | 0.077 | 0.005929 |
| 104264 | 1373055 | 3948328 | 451.963 | 452.04 | 0.077 | 0.005929 |
| 103614 | 1375032 | 3965880 | 454.243 | 454.32 | 0.077 | 0.005929 |
| 101829 | 1358149 | 3973664 | 458.083 | 458.16 | 0.077 | 0.005929 |
| 107659 | 1395479 | 3954262 | 458.133 | 458.21 | 0.077 | 0.005929 |
| 107588 | 1396532 | 3957886 | 459.213 | 459.29 | 0.077 | 0.005929 |
| 100439 | 1349197 | 3967473 | 460.123 | 460.2  | 0.077 | 0.005929 |
| 107491 | 1400606 | 3960699 | 460.393 | 460.47 | 0.077 | 0.005929 |
| 106101 | 1420784 | 3959917 | 475.024 | 475.1  | 0.077 | 0.005929 |
| 100586 | 1346165 | 3961895 | 436.782 | 436.86 | 0.078 | 0.006084 |
| 101434 | 1346900 | 3963246 | 438.732 | 438.81 | 0.078 | 0.006084 |
| 104507 | 1373829 | 3954401 | 446.972 | 447.05 | 0.078 | 0.006084 |
| 107530 | 1398656 | 3959816 | 458.102 | 458.18 | 0.078 | 0.006084 |
| 107515 | 1399440 | 3960169 | 458.712 | 458.79 | 0.078 | 0.006084 |
| 105892 | 1422129 | 3949777 | 474.272 | 474.35 | 0.078 | 0.006084 |
| 106108 | 1420792 | 3960289 | 474.922 | 475    | 0.078 | 0.006084 |
| 106303 | 1421841 | 3973115 | 475.882 | 475.96 | 0.078 | 0.006084 |
| 105462 | 1429105 | 3932394 | 495.542 | 495.62 | 0.078 | 0.006084 |
| 100732 | 1343049 | 3956554 | 433.171 | 433.25 | 0.079 | 0.006241 |
| 103765 | 1373644 | 3960058 | 443.861 | 443.94 | 0.079 | 0.006241 |
| 103704 | 1374146 | 3962239 | 450.001 | 450.08 | 0.079 | 0.006241 |
| 104240 | 1372853 | 3947970 | 451.621 | 451.7  | 0.079 | 0.006241 |
| 104002 | 1373688 | 3950262 | 453.491 | 453.57 | 0.079 | 0.006241 |
| 104359 | 1373697 | 3950041 | 453.641 | 453.72 | 0.079 | 0.006241 |
| 106162 | 1420915 | 3965763 | 471.501 | 471.58 | 0.079 | 0.006241 |
| 106169 | 1420920 | 3966088 | 472.371 | 472.45 | 0.079 | 0.006241 |
| 105664 | 1427907 | 3940077 | 488.331 | 488.41 | 0.079 | 0.006241 |
| 101062 | 1333500 | 3947371 | 540.861 | 540.94 | 0.079 | 0.006241 |
| 101027 | 1334112 | 3947740 | 562.041 | 562.12 | 0.079 | 0.006241 |
| 100781 | 1341613 | 3954908 | 432.93  | 433.01 | 0.08  | 0.0064   |
| 100866 | 1338970 | 3952277 | 433.92  | 434    | 0.08  | 0.0064   |
| 101436 | 1346936 | 3963318 | 438.65  | 438.73 | 0.08  | 0.0064   |
| 103929 | 1373752 | 3952224 | 446     | 446.08 | 0.08  | 0.0064   |
| 104236 | 1372821 | 3947914 | 451.63  | 451.71 | 0.08  | 0.0064   |
| 101502 | 1348642 | 3966400 | 457.85  | 457.93 | 0.08  | 0.0064   |
| 100435 | 1349283 | 3967629 | 459.8   | 459.88 | 0.08  | 0.0064   |
| 107465 | 1401774 | 3961152 | 460.33  | 460.41 | 0.08  | 0.0064   |
| 106957 | 1420715 | 3957087 | 474.93  | 475.01 | 0.08  | 0.0064   |
| 105930 | 1421533 | 3951684 | 476.55  | 476.63 | 0.08  | 0.0064   |
| 105722 | 1425123 | 3941621 | 485.74  | 485.82 | 0.08  | 0.0064   |
| 101246 | 1340767 | 3953920 | 433.029 | 433.11 | 0.081 | 0.006561 |
| 100905 | 1337440 | 3951571 | 433.239 | 433.32 | 0.081 | 0.006561 |
| 103825 | 1373872 | 3956924 | 445.199 | 445.28 | 0.081 | 0.006561 |
| 103601 | 1375437 | 3967114 | 448.899 | 448.98 | 0.081 | 0.006561 |
| 104241 | 1372860 | 3947984 | 451.639 | 451.72 | 0.081 | 0.006561 |

|        |         |         |         |        |       |          |
|--------|---------|---------|---------|--------|-------|----------|
| 104348 | 1373688 | 3949807 | 453.699 | 453.78 | 0.081 | 0.006561 |
| 101531 | 1349340 | 3967649 | 459.489 | 459.57 | 0.081 | 0.006561 |
| 107448 | 1402725 | 3961443 | 461.079 | 461.16 | 0.081 | 0.006561 |
| 106065 | 1420750 | 3958057 | 474.339 | 474.42 | 0.081 | 0.006561 |
| 106971 | 1420700 | 3956455 | 475.089 | 475.17 | 0.081 | 0.006561 |
| 105923 | 1421647 | 3951314 | 477.369 | 477.45 | 0.081 | 0.006561 |
| 101308 | 1343961 | 3957936 | 435.118 | 435.2  | 0.082 | 0.006724 |
| 104283 | 1373212 | 3948609 | 451.828 | 451.91 | 0.082 | 0.006724 |
| 104012 | 1373683 | 3950071 | 453.588 | 453.67 | 0.082 | 0.006724 |
| 107683 | 1394997 | 3953063 | 463.608 | 463.69 | 0.082 | 0.006724 |
| 106251 | 1421808 | 3970617 | 471.668 | 471.75 | 0.082 | 0.006724 |
| 106880 | 1420853 | 3963568 | 473.518 | 473.6  | 0.082 | 0.006724 |
| 106088 | 1420771 | 3959285 | 474.479 | 474.56 | 0.082 | 0.006724 |
| 106026 | 1420713 | 3956084 | 475.338 | 475.42 | 0.082 | 0.006724 |
| 105833 | 1423585 | 3946972 | 476.928 | 477.01 | 0.082 | 0.006724 |
| 105596 | 1430240 | 3937874 | 490.888 | 490.97 | 0.082 | 0.006724 |
| 5525   | 1388508 | 4005352 | 736.478 | 736.56 | 0.082 | 0.006724 |
| 100754 | 1342400 | 3955808 | 433.057 | 433.14 | 0.083 | 0.006889 |
| 100049 | 1357611 | 3959971 | 436.287 | 436.37 | 0.083 | 0.006889 |
| 106930 | 1420739 | 3958341 | 473.737 | 473.82 | 0.083 | 0.006889 |
| 105926 | 1421595 | 3951478 | 476.987 | 477.07 | 0.083 | 0.006889 |
| 105854 | 1422967 | 3947814 | 477.437 | 477.52 | 0.083 | 0.006889 |
| 106332 | 1421874 | 3974679 | 482.487 | 482.57 | 0.083 | 0.006889 |
| 105562 | 1430329 | 3936018 | 494.447 | 494.53 | 0.083 | 0.006889 |
| 101331 | 1344442 | 3958794 | 436.836 | 436.92 | 0.084 | 0.007056 |
| 103550 | 1376906 | 3968722 | 447.136 | 447.22 | 0.084 | 0.007056 |
| 106275 | 1421812 | 3971653 | 471.086 | 471.17 | 0.084 | 0.007056 |
| 105465 | 1429085 | 3932530 | 495.886 | 495.97 | 0.084 | 0.007056 |
| 101050 | 1333163 | 3947167 | 550.386 | 550.47 | 0.084 | 0.007056 |
| 101193 | 1337580 | 3951632 | 432.525 | 432.61 | 0.085 | 0.007225 |
| 100569 | 1346489 | 3962486 | 436.935 | 437.02 | 0.085 | 0.007225 |
| 103779 | 1373627 | 3959461 | 443.715 | 443.8  | 0.085 | 0.007225 |
| 103598 | 1375512 | 3967231 | 446.525 | 446.61 | 0.085 | 0.007225 |
| 103539 | 1377298 | 3968976 | 447.435 | 447.52 | 0.085 | 0.007225 |
| 104140 | 1372774 | 3947858 | 451.305 | 451.39 | 0.085 | 0.007225 |
| 107609 | 1396229 | 3956812 | 456.435 | 456.52 | 0.085 | 0.007225 |
| 103405 | 1379603 | 3972677 | 458.325 | 458.41 | 0.085 | 0.007225 |
| 107475 | 1401327 | 3960981 | 460.205 | 460.29 | 0.085 | 0.007225 |
| 107494 | 1400461 | 3960635 | 460.265 | 460.35 | 0.085 | 0.007225 |
| 106118 | 1420874 | 3963805 | 472.675 | 472.76 | 0.085 | 0.007225 |
| 100082 | 1358149 | 3961338 | 435.434 | 435.52 | 0.086 | 0.007396 |
| 100111 | 1358182 | 3962592 | 436.454 | 436.54 | 0.086 | 0.007396 |
| 101358 | 1345103 | 3959973 | 436.804 | 436.89 | 0.086 | 0.007396 |
| 104246 | 1372906 | 3948066 | 451.784 | 451.87 | 0.086 | 0.007396 |
| 106720 | 1421823 | 3973032 | 475.554 | 475.64 | 0.086 | 0.007396 |
| 106719 | 1421824 | 3973072 | 475.614 | 475.7  | 0.086 | 0.007396 |
| 105669 | 1427729 | 3940233 | 488.104 | 488.19 | 0.086 | 0.007396 |
| 101337 | 1344569 | 3959020 | 436.704 | 436.79 | 0.087 | 0.007569 |
| 100621 | 1345433 | 3960599 | 436.863 | 436.95 | 0.087 | 0.007569 |
| 101367 | 1345294 | 3960315 | 436.983 | 437.07 | 0.087 | 0.007569 |
| 103897 | 1373795 | 3953564 | 447.303 | 447.39 | 0.087 | 0.007569 |
| 107599 | 1396371 | 3957300 | 457.533 | 457.62 | 0.087 | 0.007569 |

|        |         |         |         |        |       |          |
|--------|---------|---------|---------|--------|-------|----------|
| 107461 | 1401974 | 3961227 | 460.423 | 460.51 | 0.087 | 0.007569 |
| 107676 | 1395200 | 3953385 | 461.753 | 461.84 | 0.087 | 0.007569 |
| 106151 | 1420906 | 3965263 | 470.403 | 470.49 | 0.087 | 0.007569 |
| 106155 | 1420908 | 3965441 | 470.443 | 470.53 | 0.087 | 0.007569 |
| 106837 | 1420900 | 3965773 | 471.503 | 471.59 | 0.087 | 0.007569 |
| 105920 | 1421686 | 3951193 | 477.463 | 477.55 | 0.087 | 0.007569 |
| 101134 | 1335606 | 3949779 | 436.452 | 436.54 | 0.088 | 0.007744 |
| 100562 | 1346666 | 3962846 | 437.022 | 437.11 | 0.088 | 0.007744 |
| 101477 | 1347978 | 3965212 | 454.412 | 454.5  | 0.088 | 0.007744 |
| 103400 | 1379603 | 3972874 | 460.182 | 460.27 | 0.088 | 0.007744 |
| 106815 | 1420936 | 3967047 | 471.992 | 472.08 | 0.088 | 0.007744 |
| 106227 | 1421781 | 3969943 | 472.352 | 472.44 | 0.088 | 0.007744 |
| 106037 | 1420724 | 3956647 | 474.982 | 475.07 | 0.088 | 0.007744 |
| 101088 | 1334443 | 3947952 | 573.862 | 573.95 | 0.088 | 0.007744 |
| 100117 | 1358192 | 3962847 | 435.991 | 436.08 | 0.089 | 0.007921 |
| 100634 | 1345193 | 3960173 | 436.731 | 436.82 | 0.089 | 0.007921 |
| 101421 | 1346507 | 3962488 | 437.171 | 437.26 | 0.089 | 0.007921 |
| 103489 | 1378855 | 3970007 | 451.892 | 451.98 | 0.089 | 0.007921 |
| 101470 | 1347812 | 3964915 | 453.581 | 453.67 | 0.089 | 0.007921 |
| 104364 | 1373699 | 3950146 | 453.661 | 453.75 | 0.089 | 0.007921 |
| 100504 | 1347823 | 3965009 | 453.921 | 454.01 | 0.089 | 0.007921 |
| 107663 | 1395417 | 3954057 | 458.701 | 458.79 | 0.089 | 0.007921 |
| 106846 | 1420892 | 3965298 | 470.471 | 470.56 | 0.089 | 0.007921 |
| 106711 | 1421832 | 3973482 | 477.291 | 477.38 | 0.089 | 0.007921 |
| 105915 | 1421777 | 3950917 | 477.442 | 477.53 | 0.089 | 0.007921 |
| 105663 | 1427968 | 3940024 | 488.381 | 488.47 | 0.089 | 0.007921 |
| 105415 | 1428961 | 3930832 | 496.891 | 496.98 | 0.089 | 0.007921 |
| 100891 | 1337962 | 3951833 | 432.57  | 432.66 | 0.09  | 0.0081   |
| 101256 | 1341603 | 3954875 | 432.83  | 432.92 | 0.09  | 0.0081   |
| 100578 | 1346336 | 3962204 | 436.81  | 436.9  | 0.09  | 0.0081   |
| 100545 | 1346949 | 3963390 | 439.23  | 439.32 | 0.09  | 0.0081   |
| 103622 | 1375006 | 3965493 | 446.81  | 446.9  | 0.09  | 0.0081   |
| 103877 | 1373818 | 3954465 | 446.83  | 446.92 | 0.09  | 0.0081   |
| 104341 | 1373685 | 3949666 | 453.36  | 453.45 | 0.09  | 0.0081   |
| 101475 | 1347935 | 3965136 | 454.12  | 454.21 | 0.09  | 0.0081   |
| 106174 | 1420930 | 3966692 | 472.18  | 472.27 | 0.09  | 0.0081   |
| 106333 | 1421874 | 3974722 | 482.82  | 482.91 | 0.09  | 0.0081   |
| 105594 | 1430301 | 3937757 | 491.21  | 491.3  | 0.09  | 0.0081   |
| 101072 | 1333852 | 3947576 | 552.46  | 552.55 | 0.09  | 0.0081   |
| 101075 | 1333964 | 3947641 | 556.67  | 556.76 | 0.09  | 0.0081   |
| 100910 | 1337264 | 3951452 | 433.279 | 433.37 | 0.091 | 0.008281 |
| 104483 | 1373798 | 3953192 | 447.019 | 447.11 | 0.091 | 0.008281 |
| 104481 | 1373795 | 3953097 | 447.319 | 447.41 | 0.091 | 0.008281 |
| 103992 | 1373697 | 3950466 | 453.649 | 453.74 | 0.091 | 0.008281 |
| 104366 | 1373700 | 3950188 | 453.649 | 453.74 | 0.091 | 0.008281 |
| 107655 | 1395542 | 3954479 | 458.259 | 458.35 | 0.091 | 0.008281 |
| 105955 | 1421142 | 3952910 | 475.51  | 475.6  | 0.091 | 0.008281 |
| 105740 | 1424227 | 3942175 | 486.199 | 486.29 | 0.091 | 0.008281 |
| 100881 | 1338340 | 3952000 | 432.478 | 432.57 | 0.092 | 0.008464 |
| 100084 | 1358151 | 3961425 | 435.188 | 435.28 | 0.092 | 0.008464 |
| 100580 | 1346296 | 3962130 | 436.838 | 436.93 | 0.092 | 0.008464 |
| 101363 | 1345210 | 3960165 | 437.008 | 437.1  | 0.092 | 0.008464 |

|        |         |         |         |        |       |          |
|--------|---------|---------|---------|--------|-------|----------|
| 103898 | 1373794 | 3953523 | 447.338 | 447.43 | 0.092 | 0.008464 |
| 103521 | 1377836 | 3969324 | 448.058 | 448.15 | 0.092 | 0.008464 |
| 104014 | 1373682 | 3950035 | 453.628 | 453.72 | 0.092 | 0.008464 |
| 100493 | 1348055 | 3965426 | 455.128 | 455.22 | 0.092 | 0.008464 |
| 107471 | 1401516 | 3961051 | 460.348 | 460.44 | 0.092 | 0.008464 |
| 106943 | 1420727 | 3957709 | 474.868 | 474.96 | 0.092 | 0.008464 |
| 105458 | 1429133 | 3932222 | 494.908 | 495    | 0.092 | 0.008464 |
| 100750 | 1342521 | 3955946 | 433.157 | 433.25 | 0.093 | 0.008649 |
| 103959 | 1373733 | 3951277 | 446.827 | 446.92 | 0.093 | 0.008649 |
| 100518 | 1347520 | 3964470 | 449.977 | 450.07 | 0.093 | 0.008649 |
| 107673 | 1395250 | 3953506 | 461.167 | 461.26 | 0.093 | 0.008649 |
| 105949 | 1421236 | 3952627 | 474.387 | 474.48 | 0.093 | 0.008649 |
| 106100 | 1420784 | 3959877 | 474.937 | 475.03 | 0.093 | 0.008649 |
| 106972 | 1420700 | 3956420 | 475.127 | 475.22 | 0.093 | 0.008649 |
| 105819 | 1423887 | 3946368 | 475.977 | 476.07 | 0.093 | 0.008649 |
| 105874 | 1422432 | 3948819 | 477.667 | 477.76 | 0.093 | 0.008649 |
| 105677 | 1427449 | 3940475 | 487.647 | 487.74 | 0.093 | 0.008649 |
| 101079 | 1334118 | 3947730 | 562.157 | 562.25 | 0.093 | 0.008649 |
| 101273 | 1342106 | 3955451 | 433.126 | 433.22 | 0.094 | 0.008836 |
| 100160 | 1358229 | 3964363 | 437.386 | 437.48 | 0.094 | 0.008836 |
| 103964 | 1373729 | 3951138 | 446.236 | 446.33 | 0.094 | 0.008836 |
| 104034 | 1373671 | 3949663 | 453.276 | 453.37 | 0.094 | 0.008836 |
| 106096 | 1420780 | 3959679 | 475.106 | 475.2  | 0.094 | 0.008836 |
| 105999 | 1420581 | 3954737 | 475.556 | 475.65 | 0.094 | 0.008836 |
| 101071 | 1333815 | 3947554 | 550.906 | 551    | 0.094 | 0.008836 |
| 101200 | 1337844 | 3951762 | 432.345 | 432.44 | 0.095 | 0.009025 |
| 101181 | 1337094 | 3951301 | 432.985 | 433.08 | 0.095 | 0.009025 |
| 100577 | 1346356 | 3962239 | 436.775 | 436.87 | 0.095 | 0.009025 |
| 101381 | 1345582 | 3960819 | 436.875 | 436.97 | 0.095 | 0.009025 |
| 103738 | 1374025 | 3960707 | 445.675 | 445.77 | 0.095 | 0.009025 |
| 104456 | 1373763 | 3952191 | 446.125 | 446.22 | 0.095 | 0.009025 |
| 103996 | 1373692 | 3950381 | 453.575 | 453.67 | 0.095 | 0.009025 |
| 100478 | 1348367 | 3965987 | 456.665 | 456.76 | 0.095 | 0.009025 |
| 101550 | 1349721 | 3968272 | 457.145 | 457.24 | 0.095 | 0.009025 |
| 106183 | 1421049 | 3967429 | 470.375 | 470.47 | 0.095 | 0.009025 |
| 101185 | 1337237 | 3951415 | 432.844 | 432.94 | 0.096 | 0.009216 |
| 103565 | 1376381 | 3968341 | 446.284 | 446.38 | 0.096 | 0.009216 |
| 103668 | 1374844 | 3963633 | 447.244 | 447.34 | 0.096 | 0.009216 |
| 103693 | 1374373 | 3962719 | 449.254 | 449.35 | 0.096 | 0.009216 |
| 104275 | 1373144 | 3948485 | 451.854 | 451.95 | 0.096 | 0.009216 |
| 101834 | 1358016 | 3973838 | 464.234 | 464.33 | 0.096 | 0.009216 |
| 106214 | 1421699 | 3968725 | 467.983 | 468.08 | 0.096 | 0.009216 |
| 101073 | 1333889 | 3947597 | 553.885 | 553.98 | 0.096 | 0.009216 |
| 101265 | 1341891 | 3955205 | 432.913 | 433.01 | 0.097 | 0.009409 |
| 100760 | 1342215 | 3955598 | 433.133 | 433.23 | 0.097 | 0.009409 |
| 101371 | 1345396 | 3960496 | 437.173 | 437.27 | 0.097 | 0.009409 |
| 104501 | 1373822 | 3954083 | 447.073 | 447.17 | 0.097 | 0.009409 |
| 103900 | 1373792 | 3953444 | 447.353 | 447.45 | 0.097 | 0.009409 |
| 101601 | 1352493 | 3969057 | 448.103 | 448.2  | 0.097 | 0.009409 |
| 104092 | 1373213 | 3948630 | 451.923 | 452.02 | 0.097 | 0.009409 |
| 107639 | 1395798 | 3955350 | 457.973 | 458.07 | 0.097 | 0.009409 |
| 107519 | 1399237 | 3960076 | 458.723 | 458.82 | 0.097 | 0.009409 |



|        |         |         |         |        |       |          |
|--------|---------|---------|---------|--------|-------|----------|
| 107590 | 1396494 | 3957757 | 458.783 | 458.88 | 0.097 | 0.009409 |
| 106200 | 1421388 | 3968063 | 465.023 | 465.12 | 0.097 | 0.009409 |
| 107009 | 1420563 | 3954742 | 474.793 | 474.89 | 0.097 | 0.009409 |
| 105672 | 1427617 | 3940331 | 487.923 | 488.02 | 0.097 | 0.009409 |
| 101857 | 1357300 | 3974448 | 488.313 | 488.41 | 0.097 | 0.009409 |
| 101063 | 1333531 | 3947389 | 541.523 | 541.62 | 0.097 | 0.009409 |
| 100565 | 1346639 | 3962787 | 436.822 | 436.92 | 0.098 | 0.009604 |
| 101361 | 1345167 | 3960089 | 436.902 | 437    | 0.098 | 0.009604 |
| 104147 | 1372713 | 3947751 | 451.022 | 451.12 | 0.098 | 0.009604 |
| 106789 | 1421332 | 3968000 | 466.302 | 466.4  | 0.098 | 0.009604 |
| 105906 | 1421913 | 3950482 | 476.182 | 476.28 | 0.098 | 0.009604 |
| 100984 | 1335027 | 3949199 | 483.322 | 483.42 | 0.098 | 0.009604 |
| 105603 | 1430051 | 3938157 | 491.032 | 491.13 | 0.098 | 0.009604 |
| 100770 | 1341924 | 3955264 | 432.931 | 433.03 | 0.099 | 0.009801 |
| 100908 | 1337334 | 3951502 | 433.311 | 433.41 | 0.099 | 0.009801 |
| 100547 | 1346909 | 3963307 | 438.741 | 438.84 | 0.099 | 0.009801 |
| 104510 | 1373834 | 3954558 | 446.581 | 446.68 | 0.099 | 0.009801 |
| 103973 | 1373723 | 3950879 | 446.701 | 446.8  | 0.099 | 0.009801 |
| 103672 | 1374800 | 3963506 | 447.781 | 447.88 | 0.099 | 0.009801 |
| 100388 | 1351608 | 3969109 | 451.461 | 451.56 | 0.099 | 0.009801 |
| 104016 | 1373681 | 3949997 | 453.701 | 453.8  | 0.099 | 0.009801 |
| 107604 | 1396304 | 3957067 | 456.611 | 456.71 | 0.099 | 0.009801 |
| 105958 | 1421076 | 3953068 | 475.452 | 475.55 | 0.099 | 0.009801 |
| 101212 | 1338317 | 3951975 | 432.49  | 432.59 | 0.1   | 0.01     |
| 100844 | 1339788 | 3952835 | 433.45  | 433.55 | 0.1   | 0.01     |
| 103740 | 1374024 | 3960632 | 445.58  | 445.68 | 0.1   | 0.01     |
| 103661 | 1374910 | 3963909 | 446.24  | 446.34 | 0.1   | 0.01     |
| 100506 | 1347780 | 3964933 | 453.88  | 453.98 | 0.1   | 0.01     |
| 107500 | 1400196 | 3960517 | 459.65  | 459.75 | 0.1   | 0.01     |
| 107486 | 1400820 | 3960785 | 460.54  | 460.64 | 0.1   | 0.01     |
| 106110 | 1420794 | 3960372 | 474.9   | 475    | 0.1   | 0.01     |
| 101086 | 1334381 | 3947895 | 572.61  | 572.71 | 0.1   | 0.01     |
| 100679 | 1344253 | 3958485 | 436.749 | 436.85 | 0.101 | 0.010201 |
| 104406 | 1373736 | 3951027 | 446.169 | 446.27 | 0.101 | 0.010201 |
| 104227 | 1372749 | 3947790 | 451.229 | 451.33 | 0.101 | 0.010201 |
| 104123 | 1372925 | 3948117 | 451.799 | 451.9  | 0.101 | 0.010201 |
| 100471 | 1348513 | 3966247 | 457.469 | 457.57 | 0.101 | 0.010201 |
| 107638 | 1395811 | 3955392 | 457.919 | 458.02 | 0.101 | 0.010201 |
| 106891 | 1420772 | 3960170 | 474.589 | 474.69 | 0.101 | 0.010201 |
| 106910 | 1420759 | 3959336 | 474.699 | 474.8  | 0.101 | 0.010201 |
| 101286 | 1343069 | 3956555 | 433.458 | 433.56 | 0.102 | 0.010404 |
| 101306 | 1343921 | 3957865 | 434.948 | 435.05 | 0.102 | 0.010404 |
| 100203 | 1358294 | 3966865 | 436.838 | 436.94 | 0.102 | 0.010404 |
| 104231 | 1372780 | 3947844 | 451.398 | 451.5  | 0.102 | 0.010404 |
| 104074 | 1373393 | 3948947 | 452.568 | 452.67 | 0.102 | 0.010404 |
| 107629 | 1395944 | 3955846 | 456.598 | 456.7  | 0.102 | 0.010404 |
| 107497 | 1400312 | 3960570 | 459.968 | 460.07 | 0.102 | 0.010404 |
| 107479 | 1401141 | 3960910 | 460.218 | 460.32 | 0.102 | 0.010404 |
| 106922 | 1420746 | 3958720 | 472.718 | 472.82 | 0.102 | 0.010404 |
| 106987 | 1420688 | 3955691 | 475.488 | 475.59 | 0.102 | 0.010404 |
| 100836 | 1340038 | 3953104 | 432.977 | 433.08 | 0.103 | 0.010609 |
| 100708 | 1343662 | 3957429 | 433.577 | 433.68 | 0.103 | 0.010609 |

|        |         |         |         |        |       |          |
|--------|---------|---------|---------|--------|-------|----------|
| 101298 | 1343687 | 3957446 | 433.907 | 434.01 | 0.103 | 0.010609 |
| 100687 | 1344094 | 3958198 | 436.147 | 436.25 | 0.103 | 0.010609 |
| 100159 | 1358227 | 3964322 | 436.967 | 437.07 | 0.103 | 0.010609 |
| 101770 | 1358387 | 3971014 | 438.597 | 438.7  | 0.103 | 0.010609 |
| 104129 | 1372875 | 3948030 | 451.627 | 451.73 | 0.103 | 0.010609 |
| 104278 | 1373168 | 3948530 | 451.837 | 451.94 | 0.103 | 0.010609 |
| 104027 | 1373676 | 3949787 | 453.507 | 453.61 | 0.103 | 0.010609 |
| 104010 | 1373684 | 3950106 | 453.537 | 453.64 | 0.103 | 0.010609 |
| 103555 | 1376723 | 3968603 | 445.896 | 446    | 0.104 | 0.010816 |
| 104238 | 1372837 | 3947942 | 451.626 | 451.73 | 0.104 | 0.010816 |
| 104116 | 1372987 | 3948227 | 451.756 | 451.86 | 0.104 | 0.010816 |
| 100498 | 1347950 | 3965238 | 454.456 | 454.56 | 0.104 | 0.010816 |
| 106072 | 1420755 | 3958439 | 473.296 | 473.4  | 0.104 | 0.010816 |
| 105865 | 1422632 | 3948353 | 478.736 | 478.84 | 0.104 | 0.010816 |
| 101208 | 1338154 | 3951903 | 432.495 | 432.6  | 0.105 | 0.011025 |
| 100907 | 1337369 | 3951526 | 433.275 | 433.38 | 0.105 | 0.011025 |
| 104096 | 1373173 | 3948559 | 451.915 | 452.02 | 0.105 | 0.011025 |
| 106079 | 1420762 | 3958786 | 472.825 | 472.93 | 0.105 | 0.011025 |
| 106022 | 1420709 | 3955879 | 475.175 | 475.28 | 0.105 | 0.011025 |
| 105998 | 1420572 | 3954706 | 475.625 | 475.73 | 0.105 | 0.011025 |
| 105841 | 1423370 | 3947277 | 476.295 | 476.4  | 0.105 | 0.011025 |
| 105918 | 1421725 | 3951073 | 477.445 | 477.55 | 0.105 | 0.011025 |
| 101210 | 1338235 | 3951939 | 432.534 | 432.64 | 0.106 | 0.011236 |
| 101299 | 1343775 | 3957603 | 434.174 | 434.28 | 0.106 | 0.011236 |
| 100164 | 1358233 | 3964543 | 436.864 | 436.97 | 0.106 | 0.011236 |
| 103634 | 1374978 | 3964966 | 446.084 | 446.19 | 0.106 | 0.011236 |
| 104430 | 1373746 | 3951527 | 446.334 | 446.44 | 0.106 | 0.011236 |
| 103895 | 1373797 | 3953647 | 447.284 | 447.39 | 0.106 | 0.011236 |
| 104148 | 1372704 | 3947736 | 450.964 | 451.07 | 0.106 | 0.011236 |
| 106841 | 1420896 | 3965583 | 470.634 | 470.74 | 0.106 | 0.011236 |
| 106826 | 1420912 | 3966597 | 472.474 | 472.58 | 0.106 | 0.011236 |
| 106879 | 1420853 | 3963608 | 473.514 | 473.62 | 0.106 | 0.011236 |
| 106019 | 1420705 | 3955714 | 475.304 | 475.41 | 0.106 | 0.011236 |
| 105584 | 1430468 | 3937241 | 492.144 | 492.25 | 0.106 | 0.011236 |
| 105414 | 1428973 | 3930805 | 496.854 | 496.96 | 0.106 | 0.011236 |
| 101275 | 1342160 | 3955513 | 432.913 | 433.02 | 0.107 | 0.011449 |
| 100867 | 1338927 | 3952258 | 433.573 | 433.68 | 0.107 | 0.011449 |
| 100047 | 1357534 | 3959933 | 436.663 | 436.77 | 0.107 | 0.011449 |
| 101418 | 1346425 | 3962333 | 437.213 | 437.32 | 0.107 | 0.011449 |
| 101767 | 1358388 | 3970925 | 438.403 | 438.51 | 0.107 | 0.011449 |
| 104508 | 1373830 | 3954440 | 446.854 | 446.96 | 0.107 | 0.011449 |
| 101462 | 1347606 | 3964546 | 451.343 | 451.45 | 0.107 | 0.011449 |
| 104091 | 1373224 | 3948649 | 451.953 | 452.06 | 0.107 | 0.011449 |
| 104018 | 1373680 | 3949956 | 453.753 | 453.86 | 0.107 | 0.011449 |
| 103401 | 1379603 | 3972833 | 459.813 | 459.92 | 0.107 | 0.011449 |
| 105995 | 1420395 | 3954266 | 474.593 | 474.7  | 0.107 | 0.011449 |
| 105598 | 1430196 | 3937947 | 490.883 | 490.99 | 0.107 | 0.011449 |
| 101099 | 1334708 | 3948494 | 549.703 | 549.81 | 0.107 | 0.011449 |
| 100901 | 1337587 | 3951657 | 432.752 | 432.86 | 0.108 | 0.011664 |
| 100729 | 1343133 | 3956656 | 432.952 | 433.06 | 0.108 | 0.011664 |
| 101799 | 1358382 | 3972256 | 443.212 | 443.32 | 0.108 | 0.011664 |
| 106780 | 1421518 | 3968314 | 463.162 | 463.27 | 0.108 | 0.011664 |

|        |         |         |         |        |       |          |
|--------|---------|---------|---------|--------|-------|----------|
| 101069 | 1333739 | 3947510 | 548.142 | 548.25 | 0.108 | 0.011664 |
| 101047 | 1333139 | 3947132 | 551.102 | 551.21 | 0.108 | 0.011664 |
| 101195 | 1337656 | 3951673 | 432.331 | 432.44 | 0.109 | 0.011881 |
| 104144 | 1372739 | 3947797 | 451.081 | 451.19 | 0.109 | 0.011881 |
| 107678 | 1395139 | 3953269 | 461.981 | 462.09 | 0.109 | 0.011881 |
| 106013 | 1420697 | 3955432 | 475.771 | 475.88 | 0.109 | 0.011881 |
| 105933 | 1421487 | 3951843 | 476.001 | 476.11 | 0.109 | 0.011881 |
| 105684 | 1427155 | 3940720 | 487.891 | 488    | 0.109 | 0.011881 |
| 105586 | 1430449 | 3937332 | 491.981 | 492.09 | 0.109 | 0.011881 |
| 100692 | 1343995 | 3958022 | 435.24  | 435.35 | 0.11  | 0.0121   |
| 100624 | 1345378 | 3960503 | 436.99  | 437.1  | 0.11  | 0.0121   |
| 103953 | 1373735 | 3951446 | 446.66  | 446.77 | 0.11  | 0.0121   |
| 103536 | 1377394 | 3969037 | 447.58  | 447.69 | 0.11  | 0.0121   |
| 104126 | 1372900 | 3948073 | 451.69  | 451.8  | 0.11  | 0.0121   |
| 107514 | 1399480 | 3960188 | 458.77  | 458.88 | 0.11  | 0.0121   |
| 101156 | 1336337 | 3950531 | 432.999 | 433.11 | 0.111 | 0.012321 |
| 100775 | 1341781 | 3955100 | 433.019 | 433.13 | 0.111 | 0.012321 |
| 101285 | 1343011 | 3956487 | 433.439 | 433.55 | 0.111 | 0.012321 |
| 100868 | 1338884 | 3952239 | 433.459 | 433.57 | 0.111 | 0.012321 |
| 104228 | 1372756 | 3947804 | 451.229 | 451.34 | 0.111 | 0.012321 |
| 104015 | 1373681 | 3950017 | 453.709 | 453.82 | 0.111 | 0.012321 |
| 107627 | 1395980 | 3955965 | 456.709 | 456.82 | 0.111 | 0.012321 |
| 107669 | 1395319 | 3953720 | 459.699 | 459.81 | 0.111 | 0.012321 |
| 107482 | 1400996 | 3960856 | 460.469 | 460.58 | 0.111 | 0.012321 |
| 106229 | 1421783 | 3970000 | 472.039 | 472.15 | 0.111 | 0.012321 |
| 106104 | 1420788 | 3960080 | 474.979 | 475.09 | 0.111 | 0.012321 |
| 106025 | 1420712 | 3956044 | 475.369 | 475.48 | 0.111 | 0.012321 |
| 101070 | 1333777 | 3947532 | 549.499 | 549.61 | 0.111 | 0.012321 |
| 100877 | 1338501 | 3952071 | 432.708 | 432.82 | 0.112 | 0.012544 |
| 100831 | 1340187 | 3953275 | 432.828 | 432.94 | 0.112 | 0.012544 |
| 100118 | 1358193 | 3962889 | 435.918 | 436.03 | 0.112 | 0.012544 |
| 103644 | 1374956 | 3964554 | 445.058 | 445.17 | 0.112 | 0.012544 |
| 104139 | 1372783 | 3947873 | 451.378 | 451.49 | 0.112 | 0.012544 |
| 107577 | 1396704 | 3958403 | 460.518 | 460.63 | 0.112 | 0.012544 |
| 106041 | 1420728 | 3956838 | 474.858 | 474.97 | 0.112 | 0.012544 |
| 106974 | 1420699 | 3956348 | 475.158 | 475.27 | 0.112 | 0.012544 |
| 105922 | 1421660 | 3951274 | 477.408 | 477.52 | 0.112 | 0.012544 |
| 101858 | 1357268 | 3974477 | 489.018 | 489.13 | 0.112 | 0.012544 |
| 101148 | 1336052 | 3950241 | 433.147 | 433.26 | 0.113 | 0.012769 |
| 100064 | 1358105 | 3960544 | 436.907 | 437.02 | 0.113 | 0.012769 |
| 100237 | 1358339 | 3968361 | 437.187 | 437.3  | 0.113 | 0.012769 |
| 103894 | 1373798 | 3953690 | 447.177 | 447.29 | 0.113 | 0.012769 |
| 106232 | 1421785 | 3970069 | 471.827 | 471.94 | 0.113 | 0.012769 |
| 106234 | 1421787 | 3970142 | 472.027 | 472.14 | 0.113 | 0.012769 |
| 106872 | 1420862 | 3963982 | 472.037 | 472.15 | 0.113 | 0.012769 |
| 106228 | 1421781 | 3969960 | 472.277 | 472.39 | 0.113 | 0.012769 |
| 105890 | 1422168 | 3949655 | 474.757 | 474.87 | 0.113 | 0.012769 |
| 106986 | 1420690 | 3955769 | 475.337 | 475.45 | 0.113 | 0.012769 |
| 106699 | 1421843 | 3974112 | 479.627 | 479.74 | 0.113 | 0.012769 |
| 101052 | 1333195 | 3947193 | 548.157 | 548.27 | 0.113 | 0.012769 |
| 100772 | 1341866 | 3955198 | 432.976 | 433.09 | 0.114 | 0.012996 |
| 104099 | 1373146 | 3948510 | 451.926 | 452.04 | 0.114 | 0.012996 |

|        |         |         |         |        |       |          |
|--------|---------|---------|---------|--------|-------|----------|
| 107550 | 1397692 | 3959375 | 458.096 | 458.21 | 0.114 | 0.012996 |
| 106944 | 1420726 | 3957673 | 474.886 | 475    | 0.114 | 0.012996 |
| 105837 | 1423481 | 3947125 | 476.766 | 476.88 | 0.114 | 0.012996 |
| 106327 | 1421868 | 3974417 | 481.346 | 481.46 | 0.114 | 0.012996 |
| 105496 | 1429301 | 3933541 | 493.176 | 493.29 | 0.114 | 0.012996 |
| 101279 | 1342273 | 3955643 | 432.945 | 433.06 | 0.115 | 0.013225 |
| 100219 | 1358312 | 3967578 | 435.625 | 435.74 | 0.115 | 0.013225 |
| 106212 | 1421664 | 3968611 | 466.065 | 466.18 | 0.115 | 0.013225 |
| 106168 | 1420918 | 3966013 | 472.465 | 472.58 | 0.115 | 0.013225 |
| 106976 | 1420699 | 3956236 | 475.485 | 475.6  | 0.115 | 0.013225 |
| 105817 | 1423913 | 3946296 | 475.945 | 476.06 | 0.115 | 0.013225 |
| 106323 | 1421863 | 3974199 | 480.215 | 480.33 | 0.115 | 0.013225 |
| 105574 | 1430495 | 3936662 | 493.285 | 493.4  | 0.115 | 0.013225 |
| 101264 | 1341863 | 3955173 | 432.934 | 433.05 | 0.116 | 0.013456 |
| 100072 | 1358138 | 3960904 | 436.634 | 436.75 | 0.116 | 0.013456 |
| 107502 | 1400075 | 3960462 | 459.404 | 459.52 | 0.116 | 0.013456 |
| 103633 | 1374980 | 3965008 | 446.083 | 446.2  | 0.117 | 0.013689 |
| 105821 | 1423845 | 3946476 | 476.263 | 476.38 | 0.117 | 0.013689 |
| 100909 | 1337299 | 3951478 | 433.282 | 433.4  | 0.118 | 0.013924 |
| 101746 | 1358366 | 3970061 | 438.522 | 438.64 | 0.118 | 0.013924 |
| 104235 | 1372813 | 3947900 | 451.522 | 451.64 | 0.118 | 0.013924 |
| 104088 | 1373256 | 3948707 | 452.102 | 452.22 | 0.118 | 0.013924 |
| 100510 | 1347693 | 3964779 | 453.192 | 453.31 | 0.118 | 0.013924 |
| 104008 | 1373685 | 3950144 | 453.502 | 453.62 | 0.118 | 0.013924 |
| 107578 | 1396688 | 3958367 | 460.533 | 460.65 | 0.118 | 0.013924 |
| 106779 | 1421538 | 3968351 | 463.272 | 463.39 | 0.118 | 0.013924 |
| 105867 | 1422591 | 3948435 | 478.592 | 478.71 | 0.118 | 0.013924 |
| 101318 | 1344179 | 3958324 | 436.291 | 436.41 | 0.119 | 0.014161 |
| 103762 | 1373704 | 3960058 | 444.081 | 444.2  | 0.119 | 0.014161 |
| 103753 | 1373944 | 3960192 | 444.331 | 444.45 | 0.119 | 0.014161 |
| 100105 | 1358175 | 3962329 | 436.709 | 436.83 | 0.12  | 0.0144   |
| 101433 | 1346883 | 3963211 | 438.67  | 438.79 | 0.12  | 0.0144   |
| 104119 | 1372960 | 3948179 | 451.71  | 451.83 | 0.12  | 0.0144   |
| 104103 | 1373107 | 3948442 | 452.02  | 452.14 | 0.12  | 0.0144   |
| 103430 | 1379602 | 3971934 | 452.76  | 452.88 | 0.12  | 0.0144   |
| 103989 | 1373703 | 3950527 | 453.88  | 454    | 0.12  | 0.0144   |
| 106832 | 1420903 | 3965998 | 472.63  | 472.75 | 0.12  | 0.0144   |
| 106305 | 1421843 | 3973201 | 475.74  | 475.86 | 0.12  | 0.0144   |
| 106314 | 1421853 | 3973677 | 478.04  | 478.16 | 0.12  | 0.0144   |
| 101867 | 1356976 | 3974864 | 494.6   | 494.72 | 0.12  | 0.0144   |
| 101039 | 1333592 | 3947439 | 543.25  | 543.37 | 0.12  | 0.0144   |
| 101259 | 1341720 | 3955010 | 432.989 | 433.11 | 0.121 | 0.014641 |
| 100696 | 1343915 | 3957878 | 434.999 | 435.12 | 0.121 | 0.014641 |
| 101772 | 1358386 | 3971057 | 438.829 | 438.95 | 0.121 | 0.014641 |
| 101775 | 1358373 | 3971240 | 439.609 | 439.73 | 0.121 | 0.014641 |
| 103407 | 1379603 | 3972605 | 457.699 | 457.82 | 0.121 | 0.014641 |
| 106796 | 1421192 | 3967769 | 470.059 | 470.18 | 0.121 | 0.014641 |
| 106963 | 1420707 | 3956791 | 475.039 | 475.16 | 0.121 | 0.014641 |
| 106304 | 1421842 | 3973158 | 475.919 | 476.04 | 0.121 | 0.014641 |
| 105711 | 1425787 | 3941422 | 485.599 | 485.72 | 0.121 | 0.014641 |
| 105459 | 1429128 | 3932256 | 494.969 | 495.09 | 0.121 | 0.014641 |
| 101190 | 1337464 | 3951567 | 432.538 | 432.66 | 0.122 | 0.014884 |

|        |         |         |         |        |       |          |
|--------|---------|---------|---------|--------|-------|----------|
| 104496 | 1373815 | 3953840 | 447.048 | 447.17 | 0.122 | 0.014884 |
| 106788 | 1421352 | 3968033 | 465.688 | 465.81 | 0.122 | 0.014884 |
| 106983 | 1420692 | 3955884 | 475.318 | 475.44 | 0.122 | 0.014884 |
| 106024 | 1420711 | 3956003 | 475.388 | 475.51 | 0.122 | 0.014884 |
| 105861 | 1422742 | 3948154 | 478.458 | 478.58 | 0.122 | 0.014884 |
| 105758 | 1423805 | 3943056 | 484.228 | 484.35 | 0.122 | 0.014884 |
| 101231 | 1340249 | 3953327 | 432.867 | 432.99 | 0.123 | 0.015129 |
| 100677 | 1344294 | 3958558 | 436.717 | 436.84 | 0.123 | 0.015129 |
| 103631 | 1374984 | 3965092 | 445.947 | 446.07 | 0.123 | 0.015129 |
| 104492 | 1373812 | 3953676 | 447.217 | 447.34 | 0.123 | 0.015129 |
| 104257 | 1372997 | 3948227 | 451.807 | 451.93 | 0.123 | 0.015129 |
| 107517 | 1399320 | 3960114 | 458.818 | 458.94 | 0.123 | 0.015129 |
| 106213 | 1421688 | 3968687 | 467.337 | 467.46 | 0.123 | 0.015129 |
| 105855 | 1422941 | 3947850 | 477.647 | 477.77 | 0.123 | 0.015129 |
| 100769 | 1341953 | 3955297 | 433.096 | 433.22 | 0.124 | 0.015376 |
| 100695 | 1343935 | 3957914 | 435.076 | 435.2  | 0.124 | 0.015376 |
| 103823 | 1373873 | 3957013 | 445.126 | 445.25 | 0.124 | 0.015376 |
| 103545 | 1377088 | 3968839 | 447.416 | 447.54 | 0.124 | 0.015376 |
| 104134 | 1372827 | 3947950 | 451.436 | 451.56 | 0.124 | 0.015376 |
| 101472 | 1347852 | 3964988 | 453.756 | 453.88 | 0.124 | 0.015376 |
| 106783 | 1421454 | 3968205 | 463.356 | 463.48 | 0.124 | 0.015376 |
| 105914 | 1421790 | 3950878 | 477.426 | 477.55 | 0.124 | 0.015376 |
| 103354 | 1379880 | 3974913 | 498.056 | 498.18 | 0.124 | 0.015376 |
| 101201 | 1337883 | 3951779 | 432.335 | 432.46 | 0.125 | 0.015625 |
| 100680 | 1344232 | 3958448 | 436.685 | 436.81 | 0.125 | 0.015625 |
| 101322 | 1344258 | 3958466 | 436.725 | 436.85 | 0.125 | 0.015625 |
| 100564 | 1346648 | 3962809 | 436.905 | 437.03 | 0.125 | 0.015625 |
| 100561 | 1346675 | 3962864 | 437.055 | 437.18 | 0.125 | 0.015625 |
| 103853 | 1373842 | 3955785 | 445.985 | 446.11 | 0.125 | 0.015625 |
| 104135 | 1372818 | 3947934 | 451.505 | 451.63 | 0.125 | 0.015625 |
| 100483 | 1348264 | 3965802 | 456.285 | 456.41 | 0.125 | 0.015625 |
| 106821 | 1420915 | 3966795 | 472.245 | 472.37 | 0.125 | 0.015625 |
| 105675 | 1427535 | 3940402 | 487.745 | 487.87 | 0.125 | 0.015625 |
| 105622 | 1429393 | 3938787 | 490.125 | 490.25 | 0.125 | 0.015625 |
| 106094 | 1420777 | 3959563 | 475.144 | 475.27 | 0.126 | 0.015876 |
| 106703 | 1421841 | 3973897 | 478.734 | 478.86 | 0.126 | 0.015876 |
| 105570 | 1430462 | 3936439 | 493.584 | 493.71 | 0.126 | 0.015876 |
| 100753 | 1342430 | 3955843 | 433.053 | 433.18 | 0.127 | 0.016129 |
| 100568 | 1346611 | 3962721 | 436.983 | 437.11 | 0.127 | 0.016129 |
| 103901 | 1373791 | 3953405 | 447.373 | 447.5  | 0.127 | 0.016129 |
| 104234 | 1372805 | 3947886 | 451.493 | 451.62 | 0.127 | 0.016129 |
| 100391 | 1351484 | 3969116 | 452.343 | 452.47 | 0.127 | 0.016129 |
| 104300 | 1373384 | 3948912 | 452.633 | 452.76 | 0.127 | 0.016129 |
| 106141 | 1420898 | 3964845 | 470.433 | 470.56 | 0.127 | 0.016129 |
| 106109 | 1420793 | 3960330 | 474.923 | 475.05 | 0.127 | 0.016129 |
| 106697 | 1421846 | 3974243 | 480.323 | 480.45 | 0.127 | 0.016129 |
| 106324 | 1421864 | 3974242 | 480.363 | 480.49 | 0.127 | 0.016129 |
| 101282 | 1342448 | 3955843 | 432.952 | 433.08 | 0.128 | 0.016384 |
| 101288 | 1343263 | 3956799 | 433.392 | 433.52 | 0.128 | 0.016384 |
| 100155 | 1358224 | 3964160 | 435.312 | 435.44 | 0.128 | 0.016384 |
| 101316 | 1344120 | 3958218 | 436.162 | 436.29 | 0.128 | 0.016384 |
| 104509 | 1373831 | 3954479 | 446.752 | 446.88 | 0.128 | 0.016384 |

|        |         |         |         |        |       |          |
|--------|---------|---------|---------|--------|-------|----------|
| 104367 | 1373701 | 3950209 | 453.682 | 453.81 | 0.128 | 0.016384 |
| 107480 | 1401105 | 3960897 | 460.192 | 460.32 | 0.128 | 0.016384 |
| 107481 | 1401032 | 3960870 | 460.232 | 460.36 | 0.128 | 0.016384 |
| 105989 | 1420318 | 3954104 | 474.722 | 474.85 | 0.128 | 0.016384 |
| 105671 | 1427672 | 3940283 | 488.052 | 488.18 | 0.128 | 0.016384 |
| 105618 | 1429511 | 3938686 | 490.072 | 490.2  | 0.128 | 0.016384 |
| 101204 | 1337998 | 3951832 | 432.251 | 432.38 | 0.129 | 0.016641 |
| 103512 | 1378040 | 3969461 | 449.641 | 449.77 | 0.129 | 0.016641 |
| 101471 | 1347832 | 3964951 | 453.631 | 453.76 | 0.129 | 0.016641 |
| 106310 | 1421848 | 3973461 | 477.191 | 477.32 | 0.129 | 0.016641 |
| 105662 | 1427998 | 3939997 | 488.391 | 488.52 | 0.129 | 0.016641 |
| 105601 | 1430102 | 3938089 | 490.921 | 491.05 | 0.129 | 0.016641 |
| 100690 | 1344035 | 3958093 | 435.86  | 435.99 | 0.13  | 0.0169   |
| 100238 | 1358341 | 3968403 | 437.12  | 437.25 | 0.13  | 0.0169   |
| 103424 | 1379603 | 3972059 | 453.46  | 453.59 | 0.13  | 0.0169   |
| 100826 | 1340332 | 3953441 | 432.859 | 432.99 | 0.131 | 0.017161 |
| 100811 | 1340764 | 3953937 | 432.949 | 433.08 | 0.131 | 0.017161 |
| 100693 | 1343975 | 3957986 | 435.169 | 435.3  | 0.131 | 0.017161 |
| 101406 | 1346128 | 3961796 | 436.609 | 436.74 | 0.131 | 0.017161 |
| 101321 | 1344238 | 3958430 | 436.679 | 436.81 | 0.131 | 0.017161 |
| 100355 | 1353046 | 3969061 | 444.389 | 444.52 | 0.131 | 0.017161 |
| 103674 | 1374771 | 3963438 | 447.929 | 448.06 | 0.131 | 0.017161 |
| 104143 | 1372748 | 3947813 | 451.119 | 451.25 | 0.131 | 0.017161 |
| 104268 | 1373087 | 3948385 | 452.039 | 452.17 | 0.131 | 0.017161 |
| 106873 | 1420861 | 3963938 | 472.119 | 472.25 | 0.131 | 0.017161 |
| 106820 | 1420916 | 3966837 | 472.259 | 472.39 | 0.131 | 0.017161 |
| 105881 | 1422308 | 3949207 | 476.069 | 476.2  | 0.131 | 0.017161 |
| 105567 | 1430419 | 3936264 | 494.039 | 494.17 | 0.131 | 0.017161 |
| 101225 | 1340056 | 3953106 | 432.947 | 433.08 | 0.132 | 0.017424 |
| 100216 | 1358309 | 3967445 | 435.298 | 435.43 | 0.132 | 0.017424 |
| 104258 | 1373006 | 3948242 | 451.828 | 451.96 | 0.132 | 0.017424 |
| 106928 | 1420741 | 3958417 | 473.368 | 473.5  | 0.132 | 0.017424 |
| 106912 | 1420756 | 3959208 | 474.219 | 474.35 | 0.132 | 0.017424 |
| 100739 | 1342846 | 3956319 | 432.967 | 433.1  | 0.133 | 0.017689 |
| 100740 | 1342817 | 3956285 | 432.997 | 433.13 | 0.133 | 0.017689 |
| 100075 | 1358141 | 3961034 | 436.297 | 436.43 | 0.133 | 0.017689 |
| 104272 | 1373119 | 3948441 | 452.027 | 452.16 | 0.133 | 0.017689 |
| 106230 | 1421784 | 3970022 | 472.007 | 472.14 | 0.133 | 0.017689 |
| 106982 | 1420693 | 3955962 | 475.327 | 475.46 | 0.133 | 0.017689 |
| 105560 | 1430295 | 3935943 | 494.337 | 494.47 | 0.133 | 0.017689 |
| 105480 | 1429166 | 3933113 | 494.877 | 495.01 | 0.133 | 0.017689 |
| 100900 | 1337624 | 3951677 | 432.806 | 432.94 | 0.134 | 0.017956 |
| 101313 | 1344061 | 3958114 | 435.766 | 435.9  | 0.134 | 0.017956 |
| 103956 | 1373733 | 3951361 | 446.706 | 446.84 | 0.134 | 0.017956 |
| 104362 | 1373698 | 3950103 | 453.626 | 453.76 | 0.134 | 0.017956 |
| 107582 | 1396618 | 3958174 | 460.056 | 460.19 | 0.134 | 0.017956 |
| 106008 | 1420678 | 3955201 | 475.836 | 475.97 | 0.134 | 0.017956 |
| 101211 | 1338276 | 3951957 | 432.555 | 432.69 | 0.135 | 0.018225 |
| 103958 | 1373733 | 3951305 | 446.715 | 446.85 | 0.135 | 0.018225 |
| 107493 | 1400497 | 3960651 | 460.305 | 460.44 | 0.135 | 0.018225 |
| 106786 | 1421393 | 3968100 | 464.655 | 464.79 | 0.135 | 0.018225 |
| 106845 | 1420893 | 3965381 | 470.375 | 470.51 | 0.135 | 0.018225 |

|        |         |         |         |        |       |          |
|--------|---------|---------|---------|--------|-------|----------|
| 106164 | 1420916 | 3965834 | 471.955 | 472.09 | 0.135 | 0.018225 |
| 106913 | 1420755 | 3959165 | 474.036 | 474.17 | 0.135 | 0.018225 |
| 106988 | 1420687 | 3955653 | 475.255 | 475.39 | 0.135 | 0.018225 |
| 100563 | 1346656 | 3962827 | 436.944 | 437.08 | 0.136 | 0.018496 |
| 100171 | 1358242 | 3964868 | 437.414 | 437.55 | 0.136 | 0.018496 |
| 104256 | 1372989 | 3948212 | 451.774 | 451.91 | 0.136 | 0.018496 |
| 104248 | 1372922 | 3948095 | 451.854 | 451.99 | 0.136 | 0.018496 |
| 104363 | 1373698 | 3950124 | 453.674 | 453.81 | 0.136 | 0.018496 |
| 104350 | 1373689 | 3949848 | 453.904 | 454.04 | 0.136 | 0.018496 |
| 107505 | 1399913 | 3960389 | 459.064 | 459.2  | 0.136 | 0.018496 |
| 101314 | 1344081 | 3958149 | 435.933 | 436.07 | 0.137 | 0.018769 |
| 105876 | 1422388 | 3948952 | 477.103 | 477.24 | 0.137 | 0.018769 |
| 106336 | 1421877 | 3974891 | 485.033 | 485.17 | 0.137 | 0.018769 |
| 105559 | 1430258 | 3935868 | 493.953 | 494.09 | 0.137 | 0.018769 |
| 105457 | 1429139 | 3932187 | 494.883 | 495.02 | 0.137 | 0.018769 |
| 100685 | 1344133 | 3958268 | 436.222 | 436.36 | 0.138 | 0.019044 |
| 100620 | 1345451 | 3960633 | 436.812 | 436.95 | 0.138 | 0.019044 |
| 104245 | 1372897 | 3948052 | 451.692 | 451.83 | 0.138 | 0.019044 |
| 104077 | 1373363 | 3948895 | 452.402 | 452.54 | 0.138 | 0.019044 |
| 100434 | 1349305 | 3967668 | 459.662 | 459.8  | 0.138 | 0.019044 |
| 106810 | 1420975 | 3967252 | 471.692 | 471.83 | 0.138 | 0.019044 |
| 106829 | 1420910 | 3966468 | 472.642 | 472.78 | 0.138 | 0.019044 |
| 106896 | 1420768 | 3959989 | 474.842 | 474.98 | 0.138 | 0.019044 |
| 106897 | 1420767 | 3959953 | 474.842 | 474.98 | 0.138 | 0.019044 |
| 105830 | 1423663 | 3946845 | 476.802 | 476.94 | 0.138 | 0.019044 |
| 105406 | 1429124 | 3930471 | 496.932 | 497.07 | 0.138 | 0.019044 |
| 104122 | 1372933 | 3948132 | 451.781 | 451.92 | 0.139 | 0.019321 |
| 104056 | 1373599 | 3949306 | 452.971 | 453.11 | 0.139 | 0.019321 |
| 107666 | 1395369 | 3953892 | 459.141 | 459.28 | 0.139 | 0.019321 |
| 106027 | 1420714 | 3956124 | 475.431 | 475.57 | 0.139 | 0.019321 |
| 105880 | 1422321 | 3949165 | 476.181 | 476.32 | 0.139 | 0.019321 |
| 101188 | 1337387 | 3951520 | 432.77  | 432.91 | 0.14  | 0.0196   |
| 103763 | 1373682 | 3960057 | 443.95  | 444.09 | 0.14  | 0.0196   |
| 104298 | 1373363 | 3948874 | 452.54  | 452.68 | 0.14  | 0.0196   |
| 100513 | 1347629 | 3964663 | 452.69  | 452.83 | 0.14  | 0.0196   |
| 104019 | 1373680 | 3949936 | 453.84  | 453.98 | 0.14  | 0.0196   |
| 103421 | 1379603 | 3972135 | 453.88  | 454.02 | 0.14  | 0.0196   |
| 106717 | 1421826 | 3973194 | 475.69  | 475.83 | 0.14  | 0.0196   |
| 100235 | 1358334 | 3968277 | 437.609 | 437.75 | 0.141 | 0.019881 |
| 103905 | 1373787 | 3953250 | 446.549 | 446.69 | 0.141 | 0.019881 |
| 103529 | 1377571 | 3969154 | 447.729 | 447.87 | 0.141 | 0.019881 |
| 107488 | 1400749 | 3960758 | 460.499 | 460.64 | 0.141 | 0.019881 |
| 106801 | 1421102 | 3967599 | 470.979 | 471.12 | 0.141 | 0.019881 |
| 106874 | 1420860 | 3963853 | 472.469 | 472.61 | 0.141 | 0.019881 |
| 106074 | 1420757 | 3958526 | 473.019 | 473.16 | 0.141 | 0.019881 |
| 105820 | 1423859 | 3946440 | 476.179 | 476.32 | 0.141 | 0.019881 |
| 105597 | 1430218 | 3937911 | 490.829 | 490.97 | 0.141 | 0.019881 |
| 101237 | 1340414 | 3953515 | 432.858 | 433    | 0.142 | 0.020164 |
| 100615 | 1345551 | 3960802 | 436.918 | 437.06 | 0.142 | 0.020164 |
| 104284 | 1373221 | 3948624 | 451.818 | 451.96 | 0.142 | 0.020164 |
| 107476 | 1401289 | 3960968 | 460.168 | 460.31 | 0.142 | 0.020164 |
| 106076 | 1420759 | 3958657 | 472.688 | 472.83 | 0.142 | 0.020164 |

|        |         |         |         |        |       |          |
|--------|---------|---------|---------|--------|-------|----------|
| 105889 | 1422181 | 3949614 | 474.858 | 475    | 0.142 | 0.020164 |
| 106906 | 1420761 | 3959538 | 475.128 | 475.27 | 0.142 | 0.020164 |
| 106031 | 1420717 | 3956326 | 475.258 | 475.4  | 0.142 | 0.020164 |
| 105829 | 1423681 | 3946813 | 476.738 | 476.88 | 0.142 | 0.020164 |
| 106710 | 1421833 | 3973564 | 477.738 | 477.88 | 0.142 | 0.020164 |
| 105692 | 1426779 | 3941003 | 488.298 | 488.44 | 0.142 | 0.020164 |
| 105512 | 1429516 | 3934109 | 493.798 | 493.94 | 0.142 | 0.020164 |
| 100892 | 1337925 | 3951817 | 432.537 | 432.68 | 0.143 | 0.020449 |
| 104017 | 1373681 | 3949977 | 453.737 | 453.88 | 0.143 | 0.020449 |
| 106208 | 1421589 | 3968420 | 464.267 | 464.41 | 0.143 | 0.020449 |
| 106098 | 1420781 | 3959758 | 474.987 | 475.13 | 0.143 | 0.020449 |
| 101041 | 1333518 | 3947396 | 541.327 | 541.47 | 0.143 | 0.020449 |
| 101197 | 1337731 | 3951711 | 432.526 | 432.67 | 0.144 | 0.020736 |
| 100812 | 1340735 | 3953903 | 432.926 | 433.07 | 0.144 | 0.020736 |
| 104130 | 1372866 | 3948015 | 451.546 | 451.69 | 0.144 | 0.020736 |
| 106171 | 1420921 | 3966161 | 472.566 | 472.71 | 0.144 | 0.020736 |
| 106887 | 1420846 | 3963256 | 473.756 | 473.9  | 0.144 | 0.020736 |
| 105836 | 1423503 | 3947095 | 476.926 | 477.07 | 0.144 | 0.020736 |
| 101423 | 1346651 | 3962757 | 436.735 | 436.88 | 0.145 | 0.021025 |
| 103892 | 1373800 | 3953778 | 447.105 | 447.25 | 0.145 | 0.021025 |
| 104041 | 1373668 | 3949557 | 453.175 | 453.32 | 0.145 | 0.021025 |
| 103413 | 1379603 | 3972391 | 455.725 | 455.87 | 0.145 | 0.021025 |
| 106895 | 1420769 | 3960024 | 474.855 | 475    | 0.145 | 0.021025 |
| 105844 | 1423276 | 3947402 | 476.505 | 476.65 | 0.145 | 0.021025 |
| 105689 | 1426937 | 3940893 | 488.355 | 488.5  | 0.145 | 0.021025 |
| 101068 | 1333701 | 3947489 | 546.795 | 546.94 | 0.145 | 0.021025 |
| 100889 | 1338036 | 3951866 | 432.504 | 432.65 | 0.146 | 0.021316 |
| 101228 | 1340167 | 3953232 | 432.794 | 432.94 | 0.146 | 0.021316 |
| 100856 | 1339363 | 3952495 | 434.584 | 434.73 | 0.146 | 0.021316 |
| 104117 | 1372978 | 3948211 | 451.734 | 451.88 | 0.146 | 0.021316 |
| 104306 | 1373446 | 3949021 | 452.844 | 452.99 | 0.146 | 0.021316 |
| 105907 | 1421900 | 3950523 | 476.374 | 476.52 | 0.146 | 0.021316 |
| 101061 | 1333468 | 3947352 | 540.454 | 540.6  | 0.146 | 0.021316 |
| 100678 | 1344273 | 3958521 | 436.683 | 436.83 | 0.147 | 0.021609 |
| 104281 | 1373195 | 3948577 | 451.813 | 451.96 | 0.147 | 0.021609 |
| 104070 | 1373436 | 3949020 | 452.743 | 452.89 | 0.147 | 0.021609 |
| 106083 | 1420766 | 3958997 | 473.303 | 473.45 | 0.147 | 0.021609 |
| 106023 | 1420709 | 3955921 | 475.173 | 475.32 | 0.147 | 0.021609 |
| 106721 | 1421823 | 3972991 | 475.323 | 475.47 | 0.147 | 0.021609 |
| 106301 | 1421839 | 3972987 | 475.464 | 475.61 | 0.147 | 0.021609 |
| 5535   | 1388893 | 4005734 | 741.603 | 741.75 | 0.147 | 0.021609 |
| 104110 | 1373045 | 3948329 | 451.932 | 452.08 | 0.148 | 0.021904 |
| 107648 | 1395661 | 3954882 | 458.082 | 458.23 | 0.148 | 0.021904 |
| 107680 | 1395095 | 3953196 | 462.542 | 462.69 | 0.148 | 0.021904 |
| 106217 | 1421732 | 3968874 | 469.972 | 470.12 | 0.148 | 0.021904 |
| 105897 | 1422054 | 3950018 | 473.852 | 474    | 0.148 | 0.021904 |
| 101856 | 1357333 | 3974420 | 487.442 | 487.59 | 0.148 | 0.021904 |
| 100682 | 1344192 | 3958376 | 436.551 | 436.7  | 0.149 | 0.022201 |
| 104115 | 1372996 | 3948244 | 451.781 | 451.93 | 0.149 | 0.022201 |
| 104369 | 1373703 | 3950250 | 453.631 | 453.78 | 0.149 | 0.022201 |
| 106785 | 1421413 | 3968135 | 464.111 | 464.26 | 0.149 | 0.022201 |
| 106894 | 1420770 | 3960060 | 474.781 | 474.93 | 0.149 | 0.022201 |



|        |         |         |         |        |       |          |
|--------|---------|---------|---------|--------|-------|----------|
| 106975 | 1420699 | 3956274 | 475.351 | 475.5  | 0.149 | 0.022201 |
| 106704 | 1421840 | 3973855 | 478.671 | 478.82 | 0.149 | 0.022201 |
| 105461 | 1429110 | 3932360 | 495.471 | 495.62 | 0.149 | 0.022201 |
| 104009 | 1373684 | 3950125 | 453.54  | 453.69 | 0.15  | 0.0225   |
| 107490 | 1400642 | 3960715 | 460.38  | 460.53 | 0.15  | 0.0225   |
| 106095 | 1420778 | 3959601 | 475.27  | 475.42 | 0.15  | 0.0225   |
| 105676 | 1427478 | 3940450 | 487.71  | 487.86 | 0.15  | 0.0225   |
| 100686 | 1344113 | 3958233 | 436.229 | 436.38 | 0.151 | 0.022801 |
| 101458 | 1347520 | 3964394 | 448.439 | 448.59 | 0.151 | 0.022801 |
| 104265 | 1373063 | 3948343 | 451.969 | 452.12 | 0.151 | 0.022801 |
| 104081 | 1373324 | 3948827 | 452.299 | 452.45 | 0.151 | 0.022801 |
| 107456 | 1402274 | 3961336 | 461.559 | 461.71 | 0.151 | 0.022801 |
| 106923 | 1420744 | 3958644 | 472.89  | 473.04 | 0.151 | 0.022801 |
| 103961 | 1373732 | 3951222 | 446.668 | 446.82 | 0.152 | 0.023104 |
| 104089 | 1373246 | 3948688 | 452.038 | 452.19 | 0.152 | 0.023104 |
| 103409 | 1379603 | 3972534 | 457.158 | 457.31 | 0.152 | 0.023104 |
| 107527 | 1398822 | 3959889 | 458.108 | 458.26 | 0.152 | 0.023104 |
| 107688 | 1394833 | 3952910 | 463.128 | 463.28 | 0.152 | 0.023104 |
| 106712 | 1421832 | 3973442 | 477.018 | 477.17 | 0.152 | 0.023104 |
| 101024 | 1334226 | 3947807 | 566.348 | 566.5  | 0.152 | 0.023104 |
| 100882 | 1338301 | 3951982 | 432.487 | 432.64 | 0.153 | 0.023409 |
| 101234 | 1340332 | 3953422 | 432.897 | 433.05 | 0.153 | 0.023409 |
| 104132 | 1372847 | 3947982 | 451.517 | 451.67 | 0.153 | 0.023409 |
| 104107 | 1373071 | 3948377 | 451.947 | 452.1  | 0.153 | 0.023409 |
| 104273 | 1373127 | 3948456 | 451.977 | 452.13 | 0.153 | 0.023409 |
| 104030 | 1373673 | 3949732 | 453.357 | 453.51 | 0.153 | 0.023409 |
| 100544 | 1346969 | 3963431 | 439.406 | 439.56 | 0.154 | 0.023716 |
| 104253 | 1372962 | 3948167 | 451.767 | 451.92 | 0.154 | 0.023716 |
| 104276 | 1373152 | 3948500 | 451.806 | 451.96 | 0.154 | 0.023716 |
| 101476 | 1347956 | 3965174 | 454.266 | 454.42 | 0.154 | 0.023716 |
| 106157 | 1420910 | 3965549 | 470.556 | 470.71 | 0.154 | 0.023716 |
| 106838 | 1420898 | 3965697 | 471.206 | 471.36 | 0.154 | 0.023716 |
| 106178 | 1420936 | 3966870 | 471.636 | 471.79 | 0.154 | 0.023716 |
| 105608 | 1429850 | 3938376 | 491.086 | 491.24 | 0.154 | 0.023716 |
| 105481 | 1429179 | 3933162 | 494.626 | 494.78 | 0.154 | 0.023716 |
| 100814 | 1340678 | 3953836 | 432.945 | 433.1  | 0.155 | 0.024025 |
| 100124 | 1358202 | 3963122 | 435.445 | 435.6  | 0.155 | 0.024025 |
| 100608 | 1345691 | 3961051 | 436.915 | 437.07 | 0.155 | 0.024025 |
| 104131 | 1372857 | 3947999 | 451.545 | 451.7  | 0.155 | 0.024025 |
| 104073 | 1373404 | 3948965 | 452.655 | 452.81 | 0.155 | 0.024025 |
| 103412 | 1379603 | 3972427 | 456.065 | 456.22 | 0.155 | 0.024025 |
| 106085 | 1420769 | 3959120 | 473.835 | 473.99 | 0.155 | 0.024025 |
| 105905 | 1421925 | 3950439 | 476.085 | 476.24 | 0.155 | 0.024025 |
| 106328 | 1421869 | 3974461 | 481.745 | 481.9  | 0.155 | 0.024025 |
| 105450 | 1429153 | 3931869 | 495.385 | 495.54 | 0.155 | 0.024025 |
| 103628 | 1374991 | 3965221 | 445.664 | 445.82 | 0.156 | 0.024336 |
| 104121 | 1372942 | 3948148 | 451.744 | 451.9  | 0.156 | 0.024336 |
| 104001 | 1373688 | 3950282 | 453.504 | 453.66 | 0.156 | 0.024336 |
| 106116 | 1420871 | 3963688 | 473.124 | 473.28 | 0.156 | 0.024336 |
| 100898 | 1337699 | 3951714 | 433.013 | 433.17 | 0.157 | 0.024649 |
| 100759 | 1342246 | 3955633 | 433.083 | 433.24 | 0.157 | 0.024649 |
| 103907 | 1373784 | 3953170 | 446.893 | 447.05 | 0.157 | 0.024649 |

|        |         |         |         |        |       |          |
|--------|---------|---------|---------|--------|-------|----------|
| 100502 | 1347865 | 3965086 | 454.163 | 454.32 | 0.157 | 0.024649 |
| 105904 | 1421938 | 3950396 | 475.903 | 476.06 | 0.157 | 0.024649 |
| 105856 | 1422890 | 3947923 | 477.913 | 478.07 | 0.157 | 0.024649 |
| 105568 | 1430442 | 3936352 | 493.783 | 493.94 | 0.157 | 0.024649 |
| 103525 | 1377778 | 3969286 | 447.642 | 447.8  | 0.158 | 0.024964 |
| 104251 | 1372946 | 3948138 | 451.832 | 451.99 | 0.158 | 0.024964 |
| 104087 | 1373267 | 3948725 | 452.132 | 452.29 | 0.158 | 0.024964 |
| 101469 | 1347771 | 3964842 | 453.362 | 453.52 | 0.158 | 0.024964 |
| 101082 | 1334237 | 3947799 | 566.952 | 567.11 | 0.158 | 0.024964 |
| 100872 | 1338711 | 3952162 | 433.061 | 433.22 | 0.159 | 0.025281 |
| 101312 | 1344041 | 3958079 | 435.761 | 435.92 | 0.159 | 0.025281 |
| 101598 | 1352359 | 3969062 | 449.041 | 449.2  | 0.159 | 0.025281 |
| 104297 | 1373352 | 3948855 | 452.481 | 452.64 | 0.159 | 0.025281 |
| 105811 | 1424002 | 3946002 | 475.771 | 475.93 | 0.159 | 0.025281 |
| 105595 | 1430281 | 3937797 | 491.101 | 491.26 | 0.159 | 0.025281 |
| 105572 | 1430486 | 3936572 | 493.441 | 493.6  | 0.159 | 0.025281 |
| 101326 | 1344339 | 3958609 | 436.87  | 437.03 | 0.16  | 0.0256   |
| 106890 | 1420772 | 3960207 | 474.56  | 474.72 | 0.16  | 0.0256   |
| 101216 | 1338483 | 3952048 | 432.629 | 432.79 | 0.161 | 0.025921 |
| 101257 | 1341632 | 3954909 | 432.889 | 433.05 | 0.161 | 0.025921 |
| 101283 | 1342565 | 3955978 | 432.929 | 433.09 | 0.161 | 0.025921 |
| 105945 | 1421300 | 3952424 | 474.739 | 474.9  | 0.161 | 0.025921 |
| 101437 | 1346970 | 3963391 | 438.838 | 439    | 0.162 | 0.026244 |
| 101465 | 1347669 | 3964660 | 452.508 | 452.67 | 0.162 | 0.026244 |
| 100446 | 1349046 | 3967200 | 460.238 | 460.4  | 0.162 | 0.026244 |
| 107677 | 1395160 | 3953307 | 461.798 | 461.96 | 0.162 | 0.026244 |
| 105593 | 1430320 | 3937717 | 491.408 | 491.57 | 0.162 | 0.026244 |
| 104237 | 1372829 | 3947928 | 451.617 | 451.78 | 0.163 | 0.026569 |
| 106092 | 1420775 | 3959484 | 475.177 | 475.34 | 0.163 | 0.026569 |
| 104247 | 1372914 | 3948081 | 451.806 | 451.97 | 0.164 | 0.026896 |
| 104307 | 1373456 | 3949038 | 452.786 | 452.95 | 0.164 | 0.026896 |
| 106812 | 1420958 | 3967170 | 471.866 | 472.03 | 0.164 | 0.026896 |
| 106311 | 1421850 | 3973548 | 477.676 | 477.84 | 0.164 | 0.026896 |
| 101084 | 1334312 | 3947845 | 569.976 | 570.14 | 0.164 | 0.026896 |
| 100830 | 1340216 | 3953309 | 432.725 | 432.89 | 0.165 | 0.027225 |
| 105807 | 1424042 | 3945807 | 476.125 | 476.29 | 0.165 | 0.027225 |
| 101054 | 1333270 | 3947237 | 544.385 | 544.55 | 0.165 | 0.027225 |
| 100730 | 1343105 | 3956621 | 433.004 | 433.17 | 0.166 | 0.027556 |
| 107658 | 1395492 | 3954304 | 458.074 | 458.24 | 0.166 | 0.027556 |
| 107492 | 1400570 | 3960684 | 460.354 | 460.52 | 0.166 | 0.027556 |
| 106102 | 1420785 | 3959957 | 475.054 | 475.22 | 0.166 | 0.027556 |
| 106028 | 1420715 | 3956204 | 475.384 | 475.55 | 0.166 | 0.027556 |
| 105883 | 1422282 | 3949288 | 475.814 | 475.98 | 0.166 | 0.027556 |
| 105835 | 1423545 | 3947034 | 477.024 | 477.19 | 0.166 | 0.027556 |
| 106707 | 1421835 | 3973688 | 478.084 | 478.25 | 0.166 | 0.027556 |
| 105565 | 1430392 | 3936179 | 494.134 | 494.3  | 0.166 | 0.027556 |
| 101319 | 1344199 | 3958359 | 436.423 | 436.59 | 0.167 | 0.027889 |
| 100514 | 1347607 | 3964625 | 452.313 | 452.48 | 0.167 | 0.027889 |
| 106211 | 1421651 | 3968573 | 465.563 | 465.73 | 0.167 | 0.027889 |
| 104277 | 1373160 | 3948515 | 451.832 | 452    | 0.168 | 0.028224 |
| 104354 | 1373693 | 3949934 | 453.902 | 454.07 | 0.168 | 0.028224 |
| 106070 | 1420753 | 3958311 | 473.652 | 473.82 | 0.168 | 0.028224 |

|        |         |         |         |        |       |          |
|--------|---------|---------|---------|--------|-------|----------|
| 101202 | 1337921 | 3951796 | 432.211 | 432.38 | 0.169 | 0.028561 |
| 100777 | 1341725 | 3955036 | 433.111 | 433.28 | 0.169 | 0.028561 |
| 104495 | 1373814 | 3953799 | 447.091 | 447.26 | 0.169 | 0.028561 |
| 104113 | 1373016 | 3948278 | 451.841 | 452.01 | 0.169 | 0.028561 |
| 105871 | 1422497 | 3948644 | 478.311 | 478.48 | 0.169 | 0.028561 |
| 104093 | 1373203 | 3948612 | 451.91  | 452.08 | 0.17  | 0.0289   |
| 107621 | 1396060 | 3956241 | 456.87  | 457.04 | 0.17  | 0.0289   |
| 106804 | 1421054 | 3967490 | 470.69  | 470.86 | 0.17  | 0.0289   |
| 106086 | 1420769 | 3959162 | 473.97  | 474.14 | 0.17  | 0.0289   |
| 101307 | 1343941 | 3957901 | 435.019 | 435.19 | 0.171 | 0.029241 |
| 105825 | 1423766 | 3946650 | 476.389 | 476.56 | 0.171 | 0.029241 |
| 105917 | 1421738 | 3951034 | 477.469 | 477.64 | 0.171 | 0.029241 |
| 100841 | 1339885 | 3952934 | 433.288 | 433.46 | 0.172 | 0.029584 |
| 104149 | 1372696 | 3947722 | 450.858 | 451.03 | 0.172 | 0.029584 |
| 106089 | 1420772 | 3959325 | 474.508 | 474.68 | 0.172 | 0.029584 |
| 106718 | 1421825 | 3973153 | 475.758 | 475.93 | 0.172 | 0.029584 |
| 105798 | 1424089 | 3945334 | 476.878 | 477.05 | 0.172 | 0.029584 |
| 100873 | 1338668 | 3952143 | 432.897 | 433.07 | 0.173 | 0.029929 |
| 104226 | 1372741 | 3947777 | 451.207 | 451.38 | 0.173 | 0.029929 |
| 104137 | 1372801 | 3947904 | 451.457 | 451.63 | 0.173 | 0.029929 |
| 104100 | 1373137 | 3948493 | 451.957 | 452.13 | 0.173 | 0.029929 |
| 104102 | 1373117 | 3948458 | 451.977 | 452.15 | 0.173 | 0.029929 |
| 106921 | 1420747 | 3958758 | 472.788 | 472.96 | 0.173 | 0.029929 |
| 105909 | 1421864 | 3950645 | 476.817 | 476.99 | 0.173 | 0.029929 |
| 105866 | 1422611 | 3948394 | 478.577 | 478.75 | 0.173 | 0.029929 |
| 106321 | 1421861 | 3974067 | 479.457 | 479.63 | 0.173 | 0.029929 |
| 101861 | 1357147 | 3974602 | 491.577 | 491.75 | 0.173 | 0.029929 |
| 100842 | 1339853 | 3952900 | 433.366 | 433.54 | 0.174 | 0.030276 |
| 100356 | 1353002 | 3969062 | 444.396 | 444.57 | 0.174 | 0.030276 |
| 104048 | 1373659 | 3949445 | 453.186 | 453.36 | 0.174 | 0.030276 |
| 104335 | 1373678 | 3949544 | 453.286 | 453.46 | 0.174 | 0.030276 |
| 104355 | 1373693 | 3949956 | 453.866 | 454.04 | 0.174 | 0.030276 |
| 106709 | 1421834 | 3973605 | 477.846 | 478.02 | 0.174 | 0.030276 |
| 105602 | 1430077 | 3938123 | 490.986 | 491.16 | 0.174 | 0.030276 |
| 101037 | 1333705 | 3947504 | 547.166 | 547.34 | 0.174 | 0.030276 |
| 104261 | 1373031 | 3948285 | 451.895 | 452.07 | 0.175 | 0.030625 |
| 104290 | 1373279 | 3948727 | 452.065 | 452.24 | 0.175 | 0.030625 |
| 104036 | 1373669 | 3949633 | 453.215 | 453.39 | 0.175 | 0.030625 |
| 104361 | 1373698 | 3950082 | 453.605 | 453.78 | 0.175 | 0.030625 |
| 106206 | 1421552 | 3968345 | 463.805 | 463.98 | 0.175 | 0.030625 |
| 105895 | 1422092 | 3949898 | 473.875 | 474.05 | 0.175 | 0.030625 |
| 106016 | 1420702 | 3955592 | 475.205 | 475.38 | 0.175 | 0.030625 |
| 106320 | 1421860 | 3974023 | 479.255 | 479.43 | 0.175 | 0.030625 |
| 107573 | 1396796 | 3958579 | 460.194 | 460.37 | 0.176 | 0.030976 |
| 107574 | 1396776 | 3958545 | 460.204 | 460.38 | 0.176 | 0.030976 |
| 106915 | 1420753 | 3959039 | 473.544 | 473.72 | 0.176 | 0.030976 |
| 106973 | 1420700 | 3956385 | 475.074 | 475.25 | 0.176 | 0.030976 |
| 105800 | 1424082 | 3945465 | 476.714 | 476.89 | 0.176 | 0.030976 |
| 105858 | 1422838 | 3947999 | 478.074 | 478.25 | 0.176 | 0.030976 |
| 100903 | 1337513 | 3951615 | 433.173 | 433.35 | 0.177 | 0.031329 |
| 100515 | 1347585 | 3964586 | 451.873 | 452.05 | 0.177 | 0.031329 |
| 104342 | 1373685 | 3949686 | 453.383 | 453.56 | 0.177 | 0.031329 |

|        |         |         |         |        |       |          |
|--------|---------|---------|---------|--------|-------|----------|
| 107541 | 1398119 | 3959570 | 457.643 | 457.82 | 0.177 | 0.031329 |
| 106778 | 1421769 | 3970217 | 472.123 | 472.3  | 0.177 | 0.031329 |
| 105903 | 1421964 | 3950310 | 475.393 | 475.57 | 0.177 | 0.031329 |
| 101325 | 1344318 | 3958573 | 436.732 | 436.91 | 0.178 | 0.031684 |
| 107477 | 1401214 | 3960939 | 460.172 | 460.35 | 0.178 | 0.031684 |
| 106173 | 1420929 | 3966656 | 472.242 | 472.42 | 0.178 | 0.031684 |
| 100846 | 1339721 | 3952771 | 433.721 | 433.9  | 0.179 | 0.032041 |
| 103896 | 1373796 | 3953605 | 447.281 | 447.46 | 0.179 | 0.032041 |
| 104229 | 1372764 | 3947817 | 451.291 | 451.47 | 0.179 | 0.032041 |
| 106205 | 1421532 | 3968309 | 463.671 | 463.85 | 0.179 | 0.032041 |
| 105585 | 1430459 | 3937287 | 492.061 | 492.24 | 0.179 | 0.032041 |
| 101233 | 1340304 | 3953391 | 432.95  | 433.13 | 0.18  | 0.0324   |
| 100473 | 1348471 | 3966172 | 457.291 | 457.47 | 0.18  | 0.0324   |
| 107498 | 1400274 | 3960553 | 459.85  | 460.03 | 0.18  | 0.0324   |
| 101074 | 1333927 | 3947619 | 555.27  | 555.45 | 0.18  | 0.0324   |
| 100834 | 1340098 | 3953173 | 432.809 | 432.99 | 0.181 | 0.032761 |
| 101430 | 1346814 | 3963073 | 438.209 | 438.39 | 0.181 | 0.032761 |
| 104491 | 1373811 | 3953634 | 447.249 | 447.43 | 0.181 | 0.032761 |
| 104112 | 1373025 | 3948295 | 451.849 | 452.03 | 0.181 | 0.032761 |
| 104288 | 1373259 | 3948692 | 451.869 | 452.05 | 0.181 | 0.032761 |
| 104028 | 1373675 | 3949769 | 453.419 | 453.6  | 0.181 | 0.032761 |
| 107576 | 1396739 | 3958475 | 460.299 | 460.48 | 0.181 | 0.032761 |
| 106831 | 1420903 | 3966035 | 472.449 | 472.63 | 0.181 | 0.032761 |
| 105838 | 1423459 | 3947155 | 476.629 | 476.81 | 0.181 | 0.032761 |
| 104267 | 1373079 | 3948371 | 451.998 | 452.18 | 0.182 | 0.033124 |
| 104321 | 1373597 | 3949286 | 453.188 | 453.37 | 0.182 | 0.033124 |
| 106119 | 1420875 | 3963843 | 472.518 | 472.7  | 0.182 | 0.033124 |
| 106908 | 1420760 | 3959419 | 475.058 | 475.24 | 0.182 | 0.033124 |
| 105916 | 1421751 | 3950995 | 477.448 | 477.63 | 0.182 | 0.033124 |
| 106319 | 1421859 | 3973979 | 479.118 | 479.3  | 0.182 | 0.033124 |
| 105599 | 1430174 | 3937983 | 490.858 | 491.04 | 0.182 | 0.033124 |
| 104239 | 1372845 | 3947956 | 451.637 | 451.82 | 0.183 | 0.033489 |
| 104254 | 1372971 | 3948182 | 451.697 | 451.88 | 0.183 | 0.033489 |
| 104038 | 1373669 | 3949604 | 453.137 | 453.32 | 0.183 | 0.033489 |
| 104323 | 1373616 | 3949321 | 453.217 | 453.4  | 0.183 | 0.033489 |
| 103416 | 1379603 | 3972287 | 454.637 | 454.82 | 0.183 | 0.033489 |
| 100791 | 1341335 | 3954590 | 432.736 | 432.92 | 0.184 | 0.033856 |
| 104243 | 1372875 | 3948011 | 451.685 | 451.87 | 0.185 | 0.034225 |
| 104005 | 1373686 | 3950203 | 453.445 | 453.63 | 0.185 | 0.034225 |
| 104022 | 1373678 | 3949878 | 453.905 | 454.09 | 0.185 | 0.034225 |
| 106166 | 1420918 | 3965940 | 472.405 | 472.59 | 0.185 | 0.034225 |
| 101221 | 1339919 | 3952950 | 433.594 | 433.78 | 0.186 | 0.034596 |
| 104282 | 1373204 | 3948593 | 451.834 | 452.02 | 0.186 | 0.034596 |
| 104084 | 1373295 | 3948776 | 452.294 | 452.48 | 0.186 | 0.034596 |
| 106850 | 1420888 | 3965093 | 470.414 | 470.6  | 0.186 | 0.034596 |
| 106823 | 1420913 | 3966714 | 472.234 | 472.42 | 0.186 | 0.034596 |
| 100158 | 1358226 | 3964281 | 436.303 | 436.49 | 0.187 | 0.034969 |
| 104125 | 1372908 | 3948087 | 451.743 | 451.93 | 0.187 | 0.034969 |
| 103418 | 1379603 | 3972224 | 454.423 | 454.61 | 0.187 | 0.034969 |
| 101196 | 1337694 | 3951692 | 432.472 | 432.66 | 0.188 | 0.035344 |
| 100076 | 1358142 | 3961078 | 436.262 | 436.45 | 0.188 | 0.035344 |
| 100524 | 1347389 | 3964235 | 443.962 | 444.15 | 0.188 | 0.035344 |

|        |         |         |         |        |       |          |
|--------|---------|---------|---------|--------|-------|----------|
| 100166 | 1358236 | 3964638 | 437.171 | 437.36 | 0.189 | 0.035721 |
| 100546 | 1346929 | 3963348 | 438.831 | 439.02 | 0.189 | 0.035721 |
| 103899 | 1373793 | 3953483 | 447.461 | 447.65 | 0.189 | 0.035721 |
| 107466 | 1401735 | 3961137 | 460.351 | 460.54 | 0.189 | 0.035721 |
| 106960 | 1420711 | 3956937 | 474.951 | 475.14 | 0.189 | 0.035721 |
| 106716 | 1421827 | 3973235 | 475.621 | 475.81 | 0.189 | 0.035721 |
| 100516 | 1347563 | 3964547 | 451.29  | 451.48 | 0.19  | 0.0361   |
| 104136 | 1372809 | 3947919 | 451.47  | 451.66 | 0.19  | 0.0361   |
| 104071 | 1373425 | 3949002 | 452.7   | 452.89 | 0.19  | 0.0361   |
| 104313 | 1373514 | 3949140 | 452.94  | 453.13 | 0.19  | 0.0361   |
| 106115 | 1420870 | 3963649 | 473.32  | 473.51 | 0.19  | 0.0361   |
| 106882 | 1420851 | 3963450 | 473.62  | 473.81 | 0.19  | 0.0361   |
| 105816 | 1423926 | 3946259 | 475.83  | 476.02 | 0.19  | 0.0361   |
| 105828 | 1423698 | 3946781 | 476.64  | 476.83 | 0.19  | 0.0361   |
| 104301 | 1373395 | 3948931 | 452.659 | 452.85 | 0.191 | 0.036481 |
| 104333 | 1373673 | 3949502 | 453.419 | 453.61 | 0.191 | 0.036481 |
| 103417 | 1379603 | 3972255 | 454.499 | 454.69 | 0.191 | 0.036481 |
| 106121 | 1420877 | 3963954 | 472.179 | 472.37 | 0.191 | 0.036481 |
| 105834 | 1423565 | 3947003 | 476.969 | 477.16 | 0.191 | 0.036481 |
| 104494 | 1373813 | 3953758 | 447.118 | 447.31 | 0.192 | 0.036864 |
| 104493 | 1373812 | 3953717 | 447.117 | 447.31 | 0.193 | 0.037249 |
| 104101 | 1373127 | 3948476 | 451.967 | 452.16 | 0.193 | 0.037249 |
| 103410 | 1379603 | 3972499 | 456.857 | 457.05 | 0.193 | 0.037249 |
| 103402 | 1379603 | 3972793 | 459.447 | 459.64 | 0.193 | 0.037249 |
| 106884 | 1420849 | 3963372 | 473.667 | 473.86 | 0.193 | 0.037249 |
| 105937 | 1421429 | 3952033 | 475.587 | 475.78 | 0.193 | 0.037249 |
| 105453 | 1429155 | 3932012 | 495.077 | 495.27 | 0.193 | 0.037249 |
| 104080 | 1373334 | 3948844 | 452.286 | 452.48 | 0.194 | 0.037636 |
| 106993 | 1420680 | 3955418 | 475.346 | 475.54 | 0.194 | 0.037636 |
| 103415 | 1379603 | 3972321 | 454.945 | 455.14 | 0.195 | 0.038025 |
| 107501 | 1400115 | 3960481 | 459.414 | 459.61 | 0.196 | 0.038416 |
| 106713 | 1421831 | 3973401 | 476.624 | 476.82 | 0.196 | 0.038416 |
| 103891 | 1373801 | 3953823 | 447.043 | 447.24 | 0.197 | 0.038809 |
| 104118 | 1372969 | 3948195 | 451.673 | 451.87 | 0.197 | 0.038809 |
| 106071 | 1420754 | 3958353 | 473.543 | 473.74 | 0.197 | 0.038809 |
| 105818 | 1423901 | 3946332 | 476.003 | 476.2  | 0.197 | 0.038809 |
| 107584 | 1396594 | 3958093 | 459.772 | 459.97 | 0.198 | 0.039204 |
| 104263 | 1373047 | 3948313 | 451.961 | 452.16 | 0.199 | 0.039601 |
| 104083 | 1373305 | 3948793 | 452.311 | 452.51 | 0.199 | 0.039601 |
| 103431 | 1379602 | 3971922 | 452.711 | 452.91 | 0.199 | 0.039601 |
| 100738 | 1342875 | 3956353 | 432.98  | 433.18 | 0.2   | 0.04     |
| 104133 | 1372837 | 3947966 | 451.48  | 451.68 | 0.2   | 0.04     |
| 105815 | 1423949 | 3946186 | 475.6   | 475.8  | 0.2   | 0.04     |
| 105809 | 1424019 | 3945926 | 476.07  | 476.27 | 0.2   | 0.04     |
| 104250 | 1372938 | 3948124 | 451.869 | 452.07 | 0.201 | 0.040401 |
| 104031 | 1373673 | 3949714 | 453.289 | 453.49 | 0.201 | 0.040401 |
| 105589 | 1430400 | 3937507 | 491.759 | 491.96 | 0.201 | 0.040401 |
| 101206 | 1338075 | 3951867 | 432.438 | 432.64 | 0.202 | 0.040804 |
| 100683 | 1344172 | 3958340 | 436.358 | 436.56 | 0.202 | 0.040804 |
| 104244 | 1372890 | 3948038 | 451.718 | 451.92 | 0.202 | 0.040804 |
| 104006 | 1373685 | 3950184 | 453.448 | 453.65 | 0.202 | 0.040804 |
| 105609 | 1429820 | 3938406 | 490.948 | 491.15 | 0.202 | 0.040804 |

|        |         |         |         |        |       |          |
|--------|---------|---------|---------|--------|-------|----------|
| 100827 | 1340303 | 3953408 | 432.857 | 433.06 | 0.203 | 0.041209 |
| 100767 | 1342010 | 3955362 | 433.257 | 433.46 | 0.203 | 0.041209 |
| 103874 | 1373822 | 3954649 | 446.287 | 446.49 | 0.203 | 0.041209 |
| 101268 | 1341972 | 3955298 | 432.967 | 433.17 | 0.204 | 0.041616 |
| 101372 | 1345416 | 3960532 | 437.036 | 437.24 | 0.204 | 0.041616 |
| 104079 | 1373344 | 3948861 | 452.306 | 452.51 | 0.204 | 0.041616 |
| 100508 | 1347736 | 3964856 | 453.517 | 453.72 | 0.204 | 0.041616 |
| 104252 | 1372954 | 3948152 | 451.825 | 452.03 | 0.205 | 0.042025 |
| 104260 | 1373022 | 3948271 | 451.895 | 452.1  | 0.205 | 0.042025 |
| 106114 | 1420869 | 3963610 | 473.425 | 473.63 | 0.205 | 0.042025 |
| 106900 | 1420764 | 3959808 | 474.845 | 475.05 | 0.205 | 0.042025 |
| 101278 | 1342244 | 3955610 | 432.914 | 433.12 | 0.206 | 0.042436 |
| 100774 | 1341809 | 3955133 | 433.015 | 433.22 | 0.206 | 0.042436 |
| 100855 | 1339400 | 3952520 | 434.354 | 434.56 | 0.206 | 0.042436 |
| 101329 | 1344401 | 3958720 | 436.884 | 437.09 | 0.206 | 0.042436 |
| 104289 | 1373269 | 3948709 | 451.964 | 452.17 | 0.206 | 0.042436 |
| 104299 | 1373374 | 3948893 | 452.554 | 452.76 | 0.206 | 0.042436 |
| 101460 | 1347562 | 3964470 | 450.113 | 450.32 | 0.207 | 0.042849 |
| 106809 | 1420986 | 3967293 | 471.353 | 471.56 | 0.207 | 0.042849 |
| 105902 | 1421977 | 3950267 | 475.123 | 475.33 | 0.207 | 0.042849 |
| 104497 | 1373817 | 3953881 | 447.032 | 447.24 | 0.208 | 0.043264 |
| 104095 | 1373183 | 3948576 | 451.912 | 452.12 | 0.208 | 0.043264 |
| 100505 | 1347801 | 3964971 | 453.822 | 454.03 | 0.208 | 0.043264 |
| 105556 | 1430201 | 3935753 | 493.852 | 494.06 | 0.208 | 0.043264 |
| 104262 | 1373039 | 3948299 | 451.921 | 452.13 | 0.209 | 0.043681 |
| 104108 | 1373062 | 3948361 | 451.931 | 452.14 | 0.209 | 0.043681 |
| 104039 | 1373668 | 3949589 | 453.131 | 453.34 | 0.209 | 0.043681 |
| 106776 | 1421771 | 3970294 | 472.001 | 472.21 | 0.209 | 0.043681 |
| 105813 | 1423971 | 3946113 | 475.561 | 475.77 | 0.209 | 0.043681 |
| 105575 | 1430499 | 3936707 | 493.191 | 493.4  | 0.209 | 0.043681 |
| 101435 | 1346918 | 3963282 | 438.72  | 438.93 | 0.21  | 0.0441   |
| 103423 | 1379603 | 3972082 | 453.56  | 453.77 | 0.21  | 0.0441   |
| 106317 | 1421856 | 3973848 | 478.48  | 478.69 | 0.21  | 0.0441   |
| 107589 | 1396506 | 3957800 | 458.899 | 459.11 | 0.211 | 0.044521 |
| 100890 | 1337999 | 3951849 | 432.458 | 432.67 | 0.212 | 0.044944 |
| 106920 | 1420748 | 3958797 | 472.758 | 472.97 | 0.212 | 0.044944 |
| 106315 | 1421855 | 3973762 | 478.338 | 478.55 | 0.212 | 0.044944 |
| 104259 | 1373014 | 3948256 | 451.837 | 452.05 | 0.213 | 0.045369 |
| 104295 | 1373330 | 3948818 | 452.397 | 452.61 | 0.213 | 0.045369 |
| 104051 | 1373644 | 3949396 | 453.087 | 453.3  | 0.213 | 0.045369 |
| 107583 | 1396606 | 3958133 | 459.867 | 460.08 | 0.213 | 0.045369 |
| 106814 | 1420942 | 3967088 | 471.807 | 472.02 | 0.213 | 0.045369 |
| 105912 | 1421815 | 3950800 | 477.157 | 477.37 | 0.213 | 0.045369 |
| 106337 | 1421878 | 3974934 | 485.947 | 486.16 | 0.213 | 0.045369 |
| 104287 | 1373249 | 3948674 | 451.786 | 452    | 0.214 | 0.045796 |
| 104106 | 1373080 | 3948393 | 452.006 | 452.22 | 0.214 | 0.045796 |
| 106784 | 1421434 | 3968170 | 463.626 | 463.84 | 0.214 | 0.045796 |
| 106091 | 1420774 | 3959405 | 474.966 | 475.18 | 0.214 | 0.045796 |
| 105485 | 1429233 | 3933248 | 494.527 | 494.74 | 0.214 | 0.045796 |
| 105407 | 1429107 | 3930508 | 496.887 | 497.1  | 0.214 | 0.045796 |
| 101459 | 1347541 | 3964432 | 449.365 | 449.58 | 0.215 | 0.046225 |
| 105437 | 1429141 | 3931288 | 495.575 | 495.79 | 0.215 | 0.046225 |

|        |         |         |         |        |       |          |
|--------|---------|---------|---------|--------|-------|----------|
| 100897 | 1337736 | 3951732 | 433.024 | 433.24 | 0.216 | 0.046656 |
| 106219 | 1421744 | 3968945 | 470.684 | 470.9  | 0.216 | 0.046656 |
| 100845 | 1339755 | 3952803 | 433.533 | 433.75 | 0.217 | 0.047089 |
| 104279 | 1373177 | 3948546 | 451.823 | 452.04 | 0.217 | 0.047089 |
| 104346 | 1373687 | 3949765 | 453.553 | 453.77 | 0.217 | 0.047089 |
| 103411 | 1379603 | 3972463 | 456.463 | 456.68 | 0.217 | 0.047089 |
| 105793 | 1424090 | 3945067 | 477.723 | 477.94 | 0.217 | 0.047089 |
| 105569 | 1430453 | 3936395 | 493.683 | 493.9  | 0.217 | 0.047089 |
| 100733 | 1343020 | 3956521 | 433.182 | 433.4  | 0.218 | 0.047524 |
| 104090 | 1373235 | 3948668 | 451.972 | 452.19 | 0.218 | 0.047524 |
| 104266 | 1373071 | 3948357 | 452.012 | 452.23 | 0.218 | 0.047524 |
| 104037 | 1373669 | 3949619 | 453.201 | 453.42 | 0.219 | 0.047961 |
| 104032 | 1373672 | 3949696 | 453.341 | 453.56 | 0.219 | 0.047961 |
| 104340 | 1373685 | 3949647 | 453.351 | 453.57 | 0.219 | 0.047961 |
| 106989 | 1420687 | 3955614 | 475.171 | 475.39 | 0.219 | 0.047961 |
| 105831 | 1423644 | 3946876 | 476.831 | 477.05 | 0.219 | 0.047961 |
| 101330 | 1344422 | 3958757 | 436.8   | 437.02 | 0.22  | 0.0484   |
| 104280 | 1373186 | 3948561 | 451.8   | 452.02 | 0.22  | 0.0484   |
| 101226 | 1340111 | 3953169 | 432.819 | 433.04 | 0.221 | 0.048841 |
| 104271 | 1373111 | 3948427 | 452.029 | 452.25 | 0.221 | 0.048841 |
| 104072 | 1373415 | 3948984 | 452.669 | 452.89 | 0.221 | 0.048841 |
| 104024 | 1373678 | 3949842 | 453.809 | 454.03 | 0.221 | 0.048841 |
| 104351 | 1373690 | 3949869 | 453.959 | 454.18 | 0.221 | 0.048841 |
| 106201 | 1421429 | 3968132 | 464.089 | 464.31 | 0.221 | 0.048841 |
| 106899 | 1420765 | 3959845 | 474.799 | 475.02 | 0.221 | 0.048841 |
| 105824 | 1423782 | 3946616 | 476.399 | 476.62 | 0.221 | 0.048841 |
| 105410 | 1429045 | 3930647 | 496.889 | 497.11 | 0.221 | 0.048841 |
| 104075 | 1373383 | 3948929 | 452.498 | 452.72 | 0.222 | 0.049284 |
| 104327 | 1373646 | 3949389 | 453.318 | 453.54 | 0.222 | 0.049284 |
| 101370 | 1345376 | 3960461 | 437.277 | 437.5  | 0.223 | 0.049729 |
| 104291 | 1373289 | 3948745 | 452.147 | 452.37 | 0.223 | 0.049729 |
| 106204 | 1421491 | 3968237 | 463.457 | 463.68 | 0.223 | 0.049729 |
| 106911 | 1420756 | 3959251 | 474.317 | 474.54 | 0.223 | 0.049729 |
| 100840 | 1339916 | 3952968 | 433.266 | 433.49 | 0.224 | 0.050176 |
| 101222 | 1339974 | 3953012 | 433.326 | 433.55 | 0.224 | 0.050176 |
| 104360 | 1373697 | 3950062 | 453.606 | 453.83 | 0.224 | 0.050176 |
| 106202 | 1421450 | 3968167 | 463.716 | 463.94 | 0.224 | 0.050176 |
| 101426 | 1346727 | 3962901 | 437.375 | 437.6  | 0.225 | 0.050625 |
| 104105 | 1373089 | 3948409 | 451.965 | 452.19 | 0.225 | 0.050625 |
| 106781 | 1421497 | 3968277 | 463.095 | 463.32 | 0.225 | 0.050625 |
| 101773 | 1358385 | 3971075 | 438.934 | 439.16 | 0.226 | 0.051076 |
| 100835 | 1340068 | 3953139 | 432.793 | 433.02 | 0.227 | 0.051529 |
| 100519 | 1347498 | 3964431 | 449.133 | 449.36 | 0.227 | 0.051529 |
| 100847 | 1339687 | 3952740 | 433.832 | 434.06 | 0.228 | 0.051984 |
| 104347 | 1373687 | 3949786 | 453.642 | 453.87 | 0.228 | 0.051984 |
| 105887 | 1422219 | 3949492 | 475.242 | 475.47 | 0.228 | 0.051984 |
| 105814 | 1423960 | 3946149 | 475.562 | 475.79 | 0.228 | 0.051984 |
| 104120 | 1372951 | 3948163 | 451.701 | 451.93 | 0.229 | 0.052441 |
| 105754 | 1423860 | 3942826 | 484.691 | 484.92 | 0.229 | 0.052441 |
| 104128 | 1372884 | 3948045 | 451.66  | 451.89 | 0.23  | 0.0529   |
| 104304 | 1373425 | 3948986 | 452.84  | 453.07 | 0.23  | 0.0529   |
| 104326 | 1373639 | 3949372 | 453.3   | 453.53 | 0.23  | 0.0529   |

|        |         |         |         |        |       |          |
|--------|---------|---------|---------|--------|-------|----------|
| 106981 | 1420694 | 3956001 | 475.45  | 475.68 | 0.23  | 0.0529   |
| 104274 | 1373135 | 3948470 | 451.899 | 452.13 | 0.231 | 0.053361 |
| 106199 | 1421368 | 3968029 | 465.579 | 465.81 | 0.231 | 0.053361 |
| 106984 | 1420691 | 3955846 | 475.349 | 475.58 | 0.231 | 0.053361 |
| 106708 | 1421834 | 3973646 | 477.929 | 478.16 | 0.231 | 0.053361 |
| 100723 | 1343298 | 3956868 | 433.078 | 433.31 | 0.232 | 0.053824 |
| 104109 | 1373054 | 3948345 | 451.938 | 452.17 | 0.232 | 0.053824 |
| 100511 | 1347672 | 3964741 | 453.078 | 453.31 | 0.232 | 0.053824 |
| 101220 | 1339801 | 3952828 | 433.687 | 433.92 | 0.233 | 0.054289 |
| 104233 | 1372796 | 3947872 | 451.457 | 451.69 | 0.233 | 0.054289 |
| 104330 | 1373662 | 3949444 | 453.297 | 453.53 | 0.233 | 0.054289 |
| 100507 | 1347758 | 3964894 | 453.747 | 453.98 | 0.233 | 0.054289 |
| 101026 | 1334150 | 3947762 | 563.407 | 563.64 | 0.233 | 0.054289 |
| 105872 | 1422463 | 3948730 | 478.066 | 478.3  | 0.234 | 0.054756 |
| 105752 | 1423890 | 3942738 | 484.896 | 485.13 | 0.234 | 0.054756 |
| 105564 | 1430377 | 3936137 | 494.226 | 494.46 | 0.234 | 0.054756 |
| 100552 | 1346805 | 3963109 | 438.295 | 438.53 | 0.235 | 0.055225 |
| 104337 | 1373682 | 3949587 | 453.215 | 453.45 | 0.235 | 0.055225 |
| 106893 | 1420770 | 3960096 | 474.725 | 474.96 | 0.235 | 0.055225 |
| 104358 | 1373696 | 3950020 | 453.694 | 453.93 | 0.236 | 0.055696 |
| 107451 | 1402545 | 3961409 | 461.284 | 461.52 | 0.236 | 0.055696 |
| 106918 | 1420750 | 3958916 | 473.154 | 473.39 | 0.236 | 0.055696 |
| 105753 | 1423875 | 3942782 | 484.745 | 484.98 | 0.236 | 0.055696 |
| 105577 | 1430503 | 3936840 | 492.804 | 493.04 | 0.236 | 0.055696 |
| 104357 | 1373695 | 3949999 | 453.743 | 453.98 | 0.237 | 0.056169 |
| 106176 | 1420933 | 3966799 | 471.902 | 472.14 | 0.238 | 0.056644 |
| 105790 | 1424077 | 3944885 | 478.382 | 478.62 | 0.238 | 0.056644 |
| 104086 | 1373276 | 3948742 | 452.211 | 452.45 | 0.239 | 0.057121 |
| 100467 | 1348596 | 3966396 | 457.861 | 458.1  | 0.239 | 0.057121 |
| 104124 | 1372916 | 3948102 | 451.77  | 452.01 | 0.24  | 0.0576   |
| 106977 | 1420698 | 3956197 | 475.49  | 475.73 | 0.24  | 0.0576   |
| 105827 | 1423732 | 3946717 | 476.5   | 476.74 | 0.24  | 0.0576   |
| 105571 | 1430471 | 3936483 | 493.53  | 493.77 | 0.24  | 0.0576   |
| 100728 | 1343161 | 3956690 | 432.939 | 433.18 | 0.241 | 0.058081 |
| 104127 | 1372892 | 3948059 | 451.689 | 451.93 | 0.241 | 0.058081 |
| 104319 | 1373577 | 3949250 | 453.149 | 453.39 | 0.241 | 0.058081 |
| 104026 | 1373676 | 3949805 | 453.569 | 453.81 | 0.241 | 0.058081 |
| 100838 | 1339978 | 3953035 | 433.087 | 433.33 | 0.243 | 0.059049 |
| 100557 | 1346720 | 3962950 | 437.107 | 437.35 | 0.243 | 0.059049 |
| 104338 | 1373683 | 3949607 | 453.237 | 453.48 | 0.243 | 0.059049 |
| 104023 | 1373678 | 3949860 | 453.857 | 454.1  | 0.243 | 0.059049 |
| 105877 | 1422374 | 3948996 | 476.927 | 477.17 | 0.243 | 0.059049 |
| 105875 | 1422417 | 3948863 | 477.397 | 477.64 | 0.243 | 0.059049 |
| 105768 | 1423803 | 3943663 | 482.147 | 482.39 | 0.243 | 0.059049 |
| 105578 | 1430503 | 3936885 | 492.687 | 492.93 | 0.243 | 0.059049 |
| 100850 | 1339582 | 3952652 | 434.596 | 434.84 | 0.244 | 0.059536 |
| 106991 | 1420684 | 3955496 | 475.366 | 475.61 | 0.244 | 0.059536 |
| 100857 | 1339326 | 3952471 | 434.535 | 434.78 | 0.245 | 0.060025 |
| 103893 | 1373799 | 3953733 | 447.105 | 447.35 | 0.245 | 0.060025 |
| 105762 | 1423780 | 3943292 | 483.524 | 483.77 | 0.246 | 0.060516 |
| 106875 | 1420859 | 3963811 | 472.603 | 472.85 | 0.247 | 0.061009 |
| 106081 | 1420765 | 3958913 | 473.013 | 473.26 | 0.247 | 0.061009 |



|        |         |         |         |        |       |          |
|--------|---------|---------|---------|--------|-------|----------|
| 106916 | 1420752 | 3958998 | 473.443 | 473.69 | 0.247 | 0.061009 |
| 105566 | 1430406 | 3936221 | 494.104 | 494.35 | 0.247 | 0.061009 |
| 106876 | 1420858 | 3963770 | 472.841 | 473.09 | 0.249 | 0.062001 |
| 100861 | 1339174 | 3952381 | 434.3   | 434.55 | 0.25  | 0.0625   |
| 104293 | 1373309 | 3948781 | 452.33  | 452.58 | 0.25  | 0.0625   |
| 104053 | 1373628 | 3949362 | 453.02  | 453.27 | 0.25  | 0.0625   |
| 105810 | 1424011 | 3945965 | 475.93  | 476.18 | 0.25  | 0.0625   |
| 105795 | 1424092 | 3945156 | 477.41  | 477.66 | 0.25  | 0.0625   |
| 105591 | 1430370 | 3937593 | 491.69  | 491.94 | 0.25  | 0.0625   |
| 100688 | 1344074 | 3958163 | 436.049 | 436.3  | 0.251 | 0.063001 |
| 104286 | 1373239 | 3948656 | 451.819 | 452.07 | 0.251 | 0.063001 |
| 103419 | 1379603 | 3972193 | 454.309 | 454.56 | 0.251 | 0.063001 |
| 104052 | 1373637 | 3949379 | 453.088 | 453.34 | 0.252 | 0.063504 |
| 106683 | 1421860 | 3974972 | 486.728 | 486.98 | 0.252 | 0.063504 |
| 100555 | 1346750 | 3963007 | 437.617 | 437.87 | 0.253 | 0.064009 |
| 106198 | 1421348 | 3967996 | 466.117 | 466.37 | 0.253 | 0.064009 |
| 100837 | 1340008 | 3953069 | 432.986 | 433.24 | 0.254 | 0.064516 |
| 104294 | 1373320 | 3948799 | 452.366 | 452.62 | 0.254 | 0.064516 |
| 106782 | 1421476 | 3968241 | 463.156 | 463.41 | 0.254 | 0.064516 |
| 106994 | 1420678 | 3955380 | 475.195 | 475.45 | 0.255 | 0.065025 |
| 105792 | 1424088 | 3945021 | 477.835 | 478.09 | 0.255 | 0.065025 |
| 100859 | 1339251 | 3952425 | 434.574 | 434.83 | 0.256 | 0.065536 |
| 106834 | 1420902 | 3965886 | 472.304 | 472.56 | 0.256 | 0.065536 |
| 104058 | 1373579 | 3949270 | 453.043 | 453.3  | 0.257 | 0.066049 |
| 104315 | 1373534 | 3949174 | 453.093 | 453.35 | 0.257 | 0.066049 |
| 105580 | 1430496 | 3937018 | 492.552 | 492.81 | 0.258 | 0.066564 |
| 104249 | 1372930 | 3948110 | 451.891 | 452.15 | 0.259 | 0.067081 |
| 104033 | 1373671 | 3949679 | 453.22  | 453.48 | 0.26  | 0.0676   |
| 104343 | 1373685 | 3949707 | 453.38  | 453.64 | 0.26  | 0.0676   |
| 104352 | 1373691 | 3949890 | 453.97  | 454.23 | 0.26  | 0.0676   |
| 105891 | 1422155 | 3949696 | 474.62  | 474.88 | 0.26  | 0.0676   |
| 105573 | 1430491 | 3936617 | 493.34  | 493.6  | 0.26  | 0.0676   |
| 103890 | 1373802 | 3953869 | 446.959 | 447.22 | 0.261 | 0.068121 |
| 104270 | 1373103 | 3948413 | 452.039 | 452.3  | 0.261 | 0.068121 |
| 104324 | 1373624 | 3949338 | 453.209 | 453.47 | 0.261 | 0.068121 |
| 106824 | 1420912 | 3966675 | 472.169 | 472.43 | 0.261 | 0.068121 |
| 103422 | 1379603 | 3972108 | 453.728 | 453.99 | 0.262 | 0.068644 |
| 100843 | 1339821 | 3952867 | 433.406 | 433.67 | 0.264 | 0.069696 |
| 100858 | 1339288 | 3952448 | 434.666 | 434.93 | 0.264 | 0.069696 |
| 104138 | 1372792 | 3947889 | 451.406 | 451.67 | 0.264 | 0.069696 |
| 104305 | 1373436 | 3949003 | 452.826 | 453.09 | 0.264 | 0.069696 |
| 105757 | 1423813 | 3943009 | 484.356 | 484.62 | 0.264 | 0.069696 |
| 104043 | 1373667 | 3949525 | 453.215 | 453.48 | 0.265 | 0.070225 |
| 104344 | 1373686 | 3949727 | 453.465 | 453.73 | 0.265 | 0.070225 |
| 101223 | 1340001 | 3953044 | 433.25  | 433.52 | 0.269 | 0.072361 |
| 101227 | 1340139 | 3953201 | 432.74  | 433.01 | 0.27  | 0.0729   |
| 104328 | 1373652 | 3949407 | 453.32  | 453.59 | 0.27  | 0.0729   |
| 106849 | 1420890 | 3965174 | 470.429 | 470.7  | 0.271 | 0.073441 |
| 105796 | 1424092 | 3945245 | 477.079 | 477.35 | 0.271 | 0.073441 |
| 100517 | 1347542 | 3964508 | 450.708 | 450.98 | 0.272 | 0.073984 |
| 105832 | 1423605 | 3946940 | 476.838 | 477.11 | 0.272 | 0.073984 |
| 104242 | 1372868 | 3947997 | 451.627 | 451.9  | 0.273 | 0.074529 |

|        |         |         |         |        |       |          |
|--------|---------|---------|---------|--------|-------|----------|
| 104322 | 1373607 | 3949304 | 453.197 | 453.47 | 0.273 | 0.074529 |
| 104040 | 1373668 | 3949573 | 453.043 | 453.32 | 0.277 | 0.076729 |
| 107575 | 1396757 | 3958510 | 460.193 | 460.47 | 0.277 | 0.076729 |
| 104339 | 1373684 | 3949627 | 453.292 | 453.57 | 0.278 | 0.077284 |
| 106097 | 1420781 | 3959719 | 475.072 | 475.35 | 0.278 | 0.077284 |
| 100852 | 1339511 | 3952597 | 434.491 | 434.77 | 0.279 | 0.077841 |
| 104064 | 1373507 | 3949143 | 452.88  | 453.16 | 0.28  | 0.0784   |
| 106787 | 1421372 | 3968067 | 465.06  | 465.34 | 0.28  | 0.0784   |
| 106014 | 1420699 | 3955471 | 475.659 | 475.94 | 0.281 | 0.078961 |
| 105823 | 1423814 | 3946547 | 476.349 | 476.63 | 0.281 | 0.078961 |
| 106338 | 1421878 | 3974976 | 486.949 | 487.23 | 0.281 | 0.078961 |
| 105607 | 1429910 | 3938316 | 491.178 | 491.46 | 0.282 | 0.079524 |
| 104066 | 1373476 | 3949091 | 452.757 | 453.04 | 0.283 | 0.080089 |
| 104325 | 1373632 | 3949355 | 453.246 | 453.53 | 0.284 | 0.080656 |
| 104104 | 1373098 | 3948425 | 451.983 | 452.27 | 0.286 | 0.081796 |
| 100853 | 1339474 | 3952570 | 434.502 | 434.79 | 0.288 | 0.082944 |
| 104317 | 1373555 | 3949211 | 453.172 | 453.46 | 0.288 | 0.082944 |
| 105756 | 1423823 | 3942963 | 484.512 | 484.8  | 0.288 | 0.082944 |
| 104063 | 1373517 | 3949161 | 452.951 | 453.24 | 0.289 | 0.083521 |
| 105587 | 1430439 | 3937376 | 491.911 | 492.2  | 0.289 | 0.083521 |
| 104336 | 1373680 | 3949566 | 453.14  | 453.43 | 0.29  | 0.0841   |
| 105581 | 1430493 | 3937062 | 492.48  | 492.77 | 0.29  | 0.0841   |
| 104055 | 1373609 | 3949325 | 452.947 | 453.24 | 0.293 | 0.085849 |
| 104060 | 1373558 | 3949232 | 453.077 | 453.37 | 0.293 | 0.085849 |
| 104035 | 1373670 | 3949648 | 453.247 | 453.54 | 0.293 | 0.085849 |
| 105908 | 1421876 | 3950605 | 476.707 | 477    | 0.293 | 0.085849 |
| 104054 | 1373619 | 3949344 | 452.986 | 453.28 | 0.294 | 0.086436 |
| 104296 | 1373341 | 3948836 | 452.435 | 452.73 | 0.296 | 0.087616 |
| 104332 | 1373670 | 3949482 | 453.334 | 453.63 | 0.296 | 0.087616 |
| 105797 | 1424091 | 3945289 | 476.945 | 477.24 | 0.296 | 0.087616 |
| 105776 | 1423917 | 3944122 | 479.914 | 480.21 | 0.296 | 0.087616 |
| 104302 | 1373405 | 3948949 | 452.713 | 453.01 | 0.297 | 0.088209 |
| 104057 | 1373589 | 3949288 | 453.013 | 453.31 | 0.297 | 0.088209 |
| 104334 | 1373676 | 3949523 | 453.382 | 453.68 | 0.298 | 0.088804 |
| 105767 | 1423790 | 3943571 | 482.532 | 482.83 | 0.298 | 0.088804 |
| 104042 | 1373667 | 3949541 | 453.161 | 453.46 | 0.299 | 0.089401 |
| 104020 | 1373679 | 3949916 | 453.871 | 454.17 | 0.299 | 0.089401 |
| 105781 | 1423989 | 3944393 | 479.461 | 479.76 | 0.299 | 0.089401 |
| 105770 | 1423820 | 3943755 | 481.791 | 482.09 | 0.299 | 0.089401 |
| 100849 | 1339617 | 3952681 | 434.23  | 434.53 | 0.3   | 0.09     |
| 105882 | 1422295 | 3949248 | 475.88  | 476.18 | 0.3   | 0.09     |
| 105826 | 1423749 | 3946684 | 476.428 | 476.73 | 0.302 | 0.091204 |
| 101224 | 1340029 | 3953075 | 433.127 | 433.43 | 0.303 | 0.091809 |
| 104349 | 1373689 | 3949828 | 453.818 | 454.12 | 0.303 | 0.091809 |
| 105913 | 1421802 | 3950839 | 477.257 | 477.56 | 0.303 | 0.091809 |
| 104292 | 1373299 | 3948764 | 452.254 | 452.56 | 0.306 | 0.093636 |
| 105775 | 1423893 | 3944031 | 480.274 | 480.58 | 0.306 | 0.093636 |
| 105759 | 1423797 | 3943102 | 484.134 | 484.44 | 0.306 | 0.093636 |
| 104076 | 1373373 | 3948912 | 452.4   | 452.71 | 0.31  | 0.0961   |
| 105755 | 1423847 | 3942872 | 484.649 | 484.96 | 0.311 | 0.096721 |
| 105579 | 1430501 | 3936929 | 492.607 | 492.92 | 0.313 | 0.097969 |
| 104331 | 1373666 | 3949463 | 453.296 | 453.61 | 0.314 | 0.098596 |

|        |         |         |         |        |       |          |
|--------|---------|---------|---------|--------|-------|----------|
| 105592 | 1430338 | 3937676 | 491.467 | 491.78 | 0.314 | 0.098596 |
| 105588 | 1430414 | 3937464 | 491.785 | 492.1  | 0.315 | 0.099225 |
| 104098 | 1373155 | 3948526 | 451.904 | 452.22 | 0.316 | 0.099856 |
| 104309 | 1373475 | 3949072 | 452.824 | 453.14 | 0.316 | 0.099856 |
| 104311 | 1373495 | 3949106 | 452.833 | 453.15 | 0.317 | 0.100489 |
| 105760 | 1423786 | 3943197 | 483.813 | 484.13 | 0.317 | 0.100489 |
| 101409 | 1346215 | 3961950 | 436.652 | 436.97 | 0.318 | 0.101124 |
| 104312 | 1373505 | 3949123 | 452.882 | 453.2  | 0.318 | 0.101124 |
| 105822 | 1423830 | 3946511 | 476.291 | 476.61 | 0.319 | 0.101761 |
| 104046 | 1373664 | 3949479 | 453.139 | 453.46 | 0.321 | 0.103041 |
| 104329 | 1373657 | 3949425 | 453.329 | 453.65 | 0.321 | 0.103041 |
| 104021 | 1373679 | 3949897 | 453.869 | 454.19 | 0.321 | 0.103041 |
| 104269 | 1373095 | 3948399 | 452.058 | 452.38 | 0.322 | 0.103684 |
| 104069 | 1373446 | 3949038 | 452.697 | 453.02 | 0.323 | 0.104329 |
| 104114 | 1373006 | 3948261 | 451.786 | 452.11 | 0.324 | 0.104976 |
| 106078 | 1420761 | 3958744 | 472.624 | 472.95 | 0.326 | 0.106276 |
| 104029 | 1373674 | 3949750 | 453.353 | 453.68 | 0.327 | 0.106929 |
| 105791 | 1424081 | 3944930 | 478.253 | 478.58 | 0.327 | 0.106929 |
| 105582 | 1430488 | 3937107 | 492.384 | 492.71 | 0.327 | 0.106929 |
| 104045 | 1373665 | 3949495 | 453.212 | 453.54 | 0.328 | 0.107584 |
| 104062 | 1373527 | 3949178 | 453.001 | 453.33 | 0.329 | 0.108241 |
| 106907 | 1420761 | 3959460 | 475.17  | 475.5  | 0.33  | 0.1089   |
| 105765 | 1423782 | 3943479 | 482.849 | 483.18 | 0.331 | 0.109561 |
| 105576 | 1430503 | 3936796 | 492.929 | 493.26 | 0.331 | 0.109561 |
| 104285 | 1373230 | 3948640 | 451.817 | 452.15 | 0.333 | 0.110889 |
| 105774 | 1423881 | 3943985 | 480.437 | 480.77 | 0.333 | 0.110889 |
| 104320 | 1373587 | 3949268 | 453.165 | 453.5  | 0.335 | 0.112225 |
| 105766 | 1423785 | 3943525 | 482.755 | 483.09 | 0.336 | 0.112896 |
| 100833 | 1340128 | 3953207 | 432.782 | 433.12 | 0.338 | 0.114244 |
| 104049 | 1373655 | 3949429 | 453.171 | 453.51 | 0.339 | 0.114921 |
| 104308 | 1373465 | 3949055 | 452.769 | 453.11 | 0.341 | 0.116281 |
| 101229 | 1340194 | 3953264 | 432.823 | 433.17 | 0.347 | 0.120409 |
| 106684 | 1421859 | 3974928 | 485.883 | 486.23 | 0.347 | 0.120409 |
| 105771 | 1423831 | 3943801 | 481.482 | 481.83 | 0.348 | 0.121104 |
| 104314 | 1373524 | 3949157 | 453.019 | 453.37 | 0.351 | 0.123201 |
| 104067 | 1373467 | 3949074 | 452.697 | 453.05 | 0.353 | 0.124609 |
| 104316 | 1373545 | 3949193 | 453.146 | 453.5  | 0.354 | 0.125316 |
| 105773 | 1423868 | 3943939 | 480.545 | 480.9  | 0.355 | 0.126025 |
| 100848 | 1339652 | 3952710 | 433.961 | 434.32 | 0.359 | 0.128881 |
| 105583 | 1430482 | 3937151 | 492.309 | 492.67 | 0.361 | 0.130321 |
| 104310 | 1373485 | 3949089 | 452.828 | 453.19 | 0.362 | 0.131044 |
| 104061 | 1373548 | 3949214 | 453.098 | 453.46 | 0.362 | 0.131044 |
| 104318 | 1373566 | 3949231 | 453.207 | 453.57 | 0.363 | 0.131769 |
| 105772 | 1423856 | 3943893 | 480.757 | 481.12 | 0.363 | 0.131769 |
| 104345 | 1373686 | 3949746 | 453.51  | 453.88 | 0.37  | 0.1369   |
| 105794 | 1424091 | 3945112 | 477.57  | 477.94 | 0.37  | 0.1369   |
| 104059 | 1373568 | 3949251 | 453.059 | 453.43 | 0.371 | 0.137641 |
| 104044 | 1373666 | 3949510 | 453.249 | 453.62 | 0.371 | 0.137641 |
| 105763 | 1423779 | 3943339 | 483.307 | 483.68 | 0.373 | 0.139129 |
| 100860 | 1339213 | 3952403 | 434.506 | 434.88 | 0.374 | 0.139876 |
| 105787 | 1424054 | 3944707 | 478.736 | 479.11 | 0.374 | 0.139876 |
| 105782 | 1424001 | 3944438 | 479.455 | 479.83 | 0.375 | 0.140625 |

|        |         |         |         |        |       |          |
|--------|---------|---------|---------|--------|-------|----------|
| 104050 | 1373650 | 3949412 | 453.183 | 453.56 | 0.377 | 0.142129 |
| 104068 | 1373456 | 3949056 | 452.717 | 453.1  | 0.383 | 0.146689 |
| 105788 | 1424067 | 3944796 | 478.528 | 478.92 | 0.392 | 0.153664 |
| 100854 | 1339437 | 3952545 | 434.407 | 434.8  | 0.393 | 0.154449 |
| 105769 | 1423811 | 3943708 | 482.019 | 482.42 | 0.401 | 0.160801 |
| 104047 | 1373662 | 3949462 | 453.153 | 453.56 | 0.407 | 0.165649 |
| 105784 | 1424031 | 3944573 | 479.081 | 479.49 | 0.409 | 0.167281 |
| 105785 | 1424040 | 3944618 | 478.888 | 479.3  | 0.412 | 0.169744 |
| 105783 | 1424012 | 3944483 | 479.511 | 479.93 | 0.419 | 0.175561 |
| 105786 | 1424047 | 3944663 | 478.829 | 479.25 | 0.421 | 0.177241 |
| 104065 | 1373497 | 3949126 | 452.807 | 453.23 | 0.423 | 0.178929 |
| 105777 | 1423930 | 3944167 | 479.76  | 480.19 | 0.43  | 0.1849   |
| 105789 | 1424073 | 3944841 | 478.453 | 478.89 | 0.437 | 0.190969 |
| 105761 | 1423782 | 3943244 | 483.707 | 484.15 | 0.443 | 0.196249 |
| 105764 | 1423779 | 3943433 | 483.013 | 483.46 | 0.447 | 0.199809 |
| 105779 | 1423955 | 3944257 | 479.595 | 480.05 | 0.455 | 0.207025 |
| 105780 | 1423978 | 3944347 | 479.554 | 480.03 | 0.476 | 0.226576 |
| 100851 | 1339547 | 3952624 | 434.66  | 435.14 | 0.48  | 0.2304   |
