# Supplementary material for: High-resolution prediction of American red squirrel in Interior Alaska: a role model for conservation using open access data, machine learning, GIS and LIDAR
Source: PeerJ journal article supplement (doi:10.7717/peerj.11830), 2021-09-14
Supplement: fairbanks_2010_metadata.zip [file fairbanks_2010_metadata.zip]

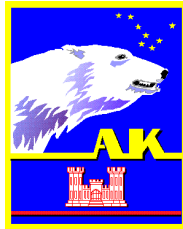

Alaska District

---

**CEPOA-CT**

**Contract: W911KB-07-D-0001**

**D.O. No. 0038**

---

## **Topographic Survey**

**Fairbanks North Star Borough  
LiDAR Mapping  
Ft. Wainwright, Alaska**

**October 2010**

## **SURVEY REPORT**

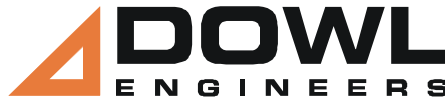

4041 B Street, Anchorage, AK 99503  
Phone (907) 562-2000 Fax (907) 563-3953  
[www.dowlhkm.com](http://www.dowlhkm.com)

**DOWL WO# 1127.60548.01**  
**Field Books: 2330, 2331, 2332, 2333**

## **FAIRBANKS NORTHSTAR BOROUGH LIDAR MAPPING**

### **FAIRBANKS, ALASKA**

**AUGUST, 2010**

### **HORIZONTAL CONTROL**

Coordinates are NAD83(2007.00) Alaska State Plane Coordinates, Zone 3, in US Feet. The Basis of Coordinates is the NAD83(2007.00) ASPC Zone 3 position of NGS Primary Airport Control Station "FAI A", PID DF3640 as retrieved from the NGS database on July 1, 2008, a 3-1/4" brass cap pipe monument, having coordinates of N=3,956,198.10967, E=1,351,803.19115 US Feet. Other horizontal positions shown hereon were determined by differential static GPS observations using Leica dual frequency receivers during the period of July 2008 and May 2010.

The Project Combined Scale Factor is 0.99994797534. To convert ground distances to ASP grid distances, multiply by a combined scale factor of 0.99994797534. To convert ASP grid distances to ground distances, multiply by a combined scale factor of 100000000000/99994797534.

### **VERTICAL CONTROL**

Elevations are NAVD88 in US Feet. The Basis of Elevations are USC&GS Bench Mark "G 121", PID TT2770, a 3-3/4" brass cap on stainless steel rod monument, having a value of 499.66 US Feet and USEO Bench Mark "DIKE 23 USE", PID TT2766, a brass cap having a value of 490.90 US Feet; as retrieved from the NGS database on July 1, 2008. Other elevations are derived from differential leveling using a Leica DNA10 digital level with fiberglass barcode rod, or differential static GPS observations using Leica dual frequency GPS receivers. Elevations derived from differential static GPS observations or RTK GPS positioning were computed using GEOID06 orthometric heights, and adding a bias of 0.080 feet to the GEOID06 orthometric height to derive NAVD88 elevations.

### **LIDAR MAPPING**

A bare-earth Digital Elevation Model (DEM) for this project was generated by Aero-Metric, Inc. of Anchorage, Alaska from Light Detection and Ranging (LiDAR) data acquired by them on **May 4<sup>th</sup> and May 6<sup>th</sup>, 2010**. Said DEM is of a quality that meets or exceeds ASPRS Class II standards for the production of **2-foot contours** in areas of moderate terrain and minimal vegetation. Areas with steep terrain or areas obscured by dense vegetation may be less accurate.

## **CHECK SHOT SURVEYS**

**DOWL HKM performed check shot surveys based on existing site control monuments, at various locations throughout the mapping limits in April and May of 2010. Check shot surveys were performed using Real Time Kinematic (RTK) GPS methods and appropriate quality assurance procedures. Check shot surveys result in the following accuracy statements applicable to the terrain and ground cover in the areas that were sampled.**

**86 check shots tested 0.26 feet fundamental vertical accuracy at 95 percent confidence level on a paved surface using  $RMSE \times 1.9600$ .**

**308 check shots tested 0.35 feet fundamental vertical accuracy at 95 percent confidence level in open terrain using  $RMSE \times 1.9600$ .**

**63 check shots tested 0.59 feet supplemental vertical accuracy at 95 percent confidence level in grass covered terrain using  $RMSE \times 1.9600$ .**

**43 check shots tested 0.55 feet supplemental vertical accuracy at 95 percent confidence level in brush covered terrain using  $RMSE \times 1.9600$ .**

**85 check shots tested 0.93 feet supplemental vertical accuracy at 95 percent confidence level in forest covered terrain using  $RMSE \times 1.9600$ .**

**SURVEY CONTROL POINT LISTING  
FAIRBANKS NORTH STAR BOROUGH  
LiDAR MAPPING PROJECT  
FAIRBANKS, ALASKA**

**Horizontal Control - NAD83(2007.00) Alaska State Plane Coordinates, Zone 3, USFeet**

Coordinates are NAD83(2007.00) Alaska State Plane Coordinates, Zone 3, in US Feet. The Basis of Coordinates is the NAD83(2007.00) ASPC Zone 3 position of NGS Primary Airport Control Station "FAI A", PID DF3640 as retrieved from the NGS database on July 1, 2008, a 3-1/4" brass cap pipe monument, having coordinates of N=3956198.10967, E=1351803.19115 US Feet. Other horizontal positions shown hereon were determined by differential static GPS observations using Leica dual frequency receivers during the period of July 2008 and May 2010.

**Scale Factor**

The Project Combined Scale Factor is 0.99994797534. To convert ground distances to Alaska State Plane Zone 3 (ASPCZ3) grid distances, multiply by a combined scale factor of 0.99994797534. To convert ASPZ3 grid distances to ground distances, multiply by a combined scale factor of 100000000000/99994797534.

**Vertical Control - NAVD88, US Feet**

Elevations are NAVD88 in US Feet. The Basis of Elevations are USC&GS Bench Mark "G 121", PID TT2770, a 3-3/4" brass cap on stainless steel rod monument, having a value of 499.66 US Feet and USEO Bench Mark "DIKE 23 USE", PID TT2766, a brass cap having a value of 490.90 US Feet; as retrieved from the NGS database on July 1, 2008. Other elevations are derived from differential leveling using a Leica DNA10 digital level with fiberglass barcode rod (Lev.), or differential static GPS observations using Leica dual frequency GPS receivers (GPS), or real time kinematic GPS positioning using the same receivers (RTK), as noted, during the period of July 27 through August 15, 2008, and during the period of April 19 through May 22, 2010. Elevations derived from differential static GPS observations or RTK GPS positioning were computed using GEOID06 orthometric heights, and adding a bias of 0.080 feet to the GEOID06 orthometric height to derive NAVD88 elevations.

**Primary Control Monuments Held**

| ID    | PID    | Northing     | Easting      | Elevation | Lev./GPS | Description | Survey Point # |
|-------|--------|--------------|--------------|-----------|----------|-------------|----------------|
| FAI A | DF3640 | 3,956,198.11 | 1,351,803.19 | 431.54    | Lev.     | Brass Cap   | 551            |

**LiDAR Control Monuments**

| ID                | PID | Northing     | Easting      | Elevation | Lev./GPS | Description  | Survey Point # |
|-------------------|-----|--------------|--------------|-----------|----------|--------------|----------------|
| BUNKER            |     | 3,933,338.50 | 1,449,701.88 | 519.03    | Lev.     | Brass Cap    | 1              |
| POT STA 400+97.57 |     | 3,945,308.17 | 1,456,120.73 | 531.35    | Lev.     | Aluminum Mon | 729            |

**SURVEY CONTROL POINT LISTING  
FAIRBANKS NORTH STAR BOROUGH  
LiDAR MAPPING PROJECT  
FAIRBANKS, ALASKA**

**Control Monuments**

| <b>ID</b>        | <b>PID</b> | <b>Northing</b> | <b>Easting</b> | <b>Elevation</b> | <b>Lev./GPS</b> | <b>Description</b>  | <b>Survey Point #</b> |
|------------------|------------|-----------------|----------------|------------------|-----------------|---------------------|-----------------------|
| COLLAGE          | TT2844     | 3,971,376.33    | 1,357,412.48   | 522.8            | GPS             | Brass Cap           | 705                   |
| CRREL            |            | 4,005,859.39    | 1,388,940.07   | 739.3            | GPS             | Alcap               | 403                   |
| FAIR-6           |            | 3,931,066.98    | 1,429,017.38   | 494.4            | GPS             | Brass Cap           | 706                   |
| GATE             |            | 3,908,409.98    | 1,464,435.64   | 533.5            | GPS             | Aluminum Mon        | 734                   |
| GPS CHS 6.4      |            | 3,983,144.21    | 1,420,167.39   | 611.3            | GPS             | Aluminum Mon        | 709                   |
| GPS TLC-1        |            | 3,949,230.54    | 1,380,130.37   | 459.18           | Lev.            | Alcap on rod        | 702                   |
| INITIAL          | TT6711     | 3,973,388.07    | 1,384,880.56   | 1,100.6          | GPS             | Brass Cap           | 552                   |
| PC STA 112+13.17 |            | 3,920,927.56    | 1,441,394.27   | 525.87           | Lev.            | Aluminum Mon        | 708                   |
| PI 3 (Tanana)    |            | 3,924,815.07    | 1,428,047.05   | 497.1            | GPS             | Brass Cap           | 707                   |
| Q 121            | TT2808     | 4,004,587.87    | 1,385,264.27   | 721.4            | GPS             | Brass Cap           | 741                   |
| RIDGE            | DH4891     | 3,969,263.39    | 1,350,260.85   | 458.2            | GPS             | Brass Cap/Drive Rod | 703                   |
| U 53             | TT2896     | 3,954,070.11    | 1,394,742.74   | 456.8            | GPS             | Brass Cap           | 701                   |
| XS-TLC-3R        |            | 3,947,075.41    | 1,333,084.66   | 547.9            | GPS             | Alcap               | 704                   |
| 401              |            | 3,959,232.85    | 1,355,915.14   | 434.1            | GPS             | Magnail             | 401                   |
| 402              |            | 3,920,248.91    | 1,439,563.53   | 514.9            | GPS             | Magnail             | 402                   |

**SURVEY CONTROL POINT LISTING  
FAIRBANKS NORTH STAR BOROUGH  
LiDAR MAPPING PROJECT  
FAIRBANKS, ALASKA**

**GPS, Traverse, and Sideshot Summaries**

| File Name | Basis of Bearings | Includes Points                                                                                                                                                              | Raw Angular Error<br>Per/Set | Raw Error of<br>Closure | Error of Closure After<br>Adj. |
|-----------|-------------------|------------------------------------------------------------------------------------------------------------------------------------------------------------------------------|------------------------------|-------------------------|--------------------------------|
| STS01     | Static GPS        | BUNKER, COLLAGE, CRREL,<br>FAI A, FAIR-6, GATE, CHS 6.4,<br>RIDGE, GPS TLC-1, INITIAL, PC<br>STA 112+13.17, PI 3, POT STA<br>400+97.57, Q 121, U 53, XS-TLC-<br>3R, 401, 402 | N/A                          | N/A                     | N/A                            |

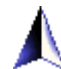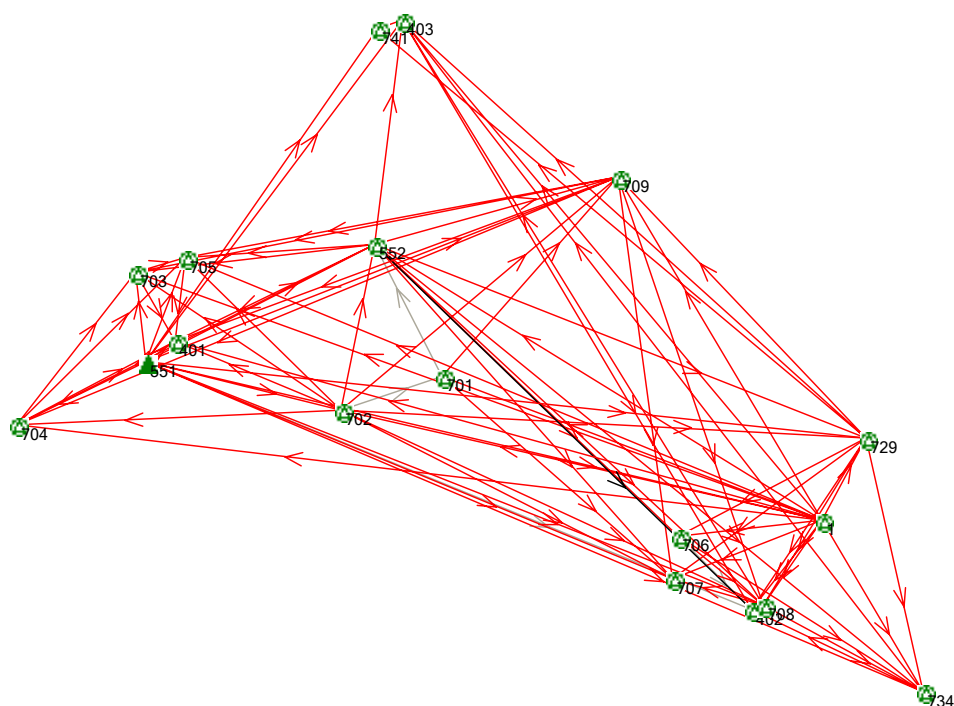

20000.0 m

| Point Id                                                                           | Point Class | Latitude            | Longitude            | Ellip. Hgt. | Ortho. Hgt. | Code            |
|------------------------------------------------------------------------------------|-------------|---------------------|----------------------|-------------|-------------|-----------------|
|  1   | Adjusted    | 64° 45' 28.83430" N | 147° 13' 16.86361" W | 550.27792   | 519.03455   | CNTL/HVPT.BCMON |
|  401 | Adjusted    | 64° 49' 21.41286" N | 147° 49' 35.18762" W | 465.23547   | 434.13974   | CNTL/HCPT.MAG   |
|  402 | Adjusted    | 64° 43' 18.04977" N | 147° 17' 04.41267" W | 546.24248   | 514.89412   | CNTL/HCPT.MAG   |
|  403 | Adjusted    | 64° 57' 09.00166" N | 147° 37' 19.95371" W | 770.18689   | 739.28144   | CNTL/HCPT.ALCAP |
|  551 | Control     | 64° 48' 50.38170" N | 147° 51' 08.10888" W | 462.53544   | 431.37737   | CNTL/HVPT.BCMON |
|  552 | Control     | 64° 51' 48.48997" N | 147° 38' 34.60171" W | 1131.47024  | 1100.57791  | CNTL/HVPT.BCMON |
|  701 | Adjusted    | 64° 48' 40.88746" N | 147° 34' 35.30747" W | 487.74739   | 456.84522   | CNTL/HVPT.BCMON |
|  702 | Control     | 64° 47' 49.58474" N | 147° 40' 09.75174" W | 490.06633   | 459.07230   | CNTL/HVPT.ALMON |
|  703 | Adjusted    | 64° 50' 58.46942" N | 147° 51' 52.60864" W | 489.31767   | 458.18912   | CNTL/HVPT.BCMON |
|  704 | Adjusted    | 64° 47' 15.07652" N | 147° 58' 13.72314" W | 579.34802   | 547.86515   | CNTL/HCPT.ALCAP |
|  705 | Adjusted    | 64° 51' 21.30427" N | 147° 49' 08.66623" W | 553.84594   | 522.80597   | CNTL/HVPT.BCMON |
|  706 | Control     | 64° 45' 02.34370" N | 147° 21' 12.46525" W | 525.45798   | 494.33271   | CNTL/HVPT.BCMON |
|  707 | Control     | 64° 44' 00.61851" N | 147° 21' 31.73227" W | 528.27448   | 497.06063   | CNTL/HCPT.BCMON |
|  708 | Control     | 64° 43' 25.09175" N | 147° 16' 22.58812" W | 557.22116   | 525.86952   | CNTL/HVPT.ALMON |
|  709 | Adjusted    | 64° 53' 32.88236" N | 147° 25' 03.24280" W | 642.15174   | 611.32175   | CNTL/HCPT.ALMON |
|  729 | Adjusted    | 64° 47' 27.82469" N | 147° 10' 54.06599" W | 562.57286   | 531.40166   | CNTL/HVPT.ALMON |
|  734 | Adjusted    | 64° 41' 26.19579" N | 147° 07' 27.06885" W | 565.12427   | 533.44782   | CNTL/HVPT.ALMON |
|  741 | Adjusted    | 64° 56' 55.55680" N | 147° 38' 44.50502" W | 752.27131   | 721.37570   | CNTL/HVPT.BCMON |



| Point Id                                                                           | Point Class | Northing      | Easting       | Ellip. Hgt. | Ortho. Hgt. | Code            |
|------------------------------------------------------------------------------------|-------------|---------------|---------------|-------------|-------------|-----------------|
|  1   | Adjusted    | 3933338.50085 | 1449701.87531 | 550.27792   | 519.03455   | CNTL/HVPT.BCMON |
|  401 | Adjusted    | 3959232.85454 | 1355915.14279 | 465.23547   | 434.13974   | CNTL/HCPT.MAG   |
|  402 | Adjusted    | 3920248.91167 | 1439563.50985 | 546.24248   | 514.89412   | CNTL/HCPT.MAG   |
|  403 | Adjusted    | 4005859.39038 | 1388940.07359 | 770.18689   | 739.28144   | CNTL/HCPT.ALCAP |
|  551 | Control     | 3956198.10993 | 1351803.19116 | 462.53544   | 431.37737   | CNTL/HVPT.BCMON |
|  552 | Control     | 3973388.06945 | 1384880.56272 | 1131.47024  | 1100.57791  | CNTL/HVPT.BCMON |
|  701 | Adjusted    | 3954070.11303 | 1394742.73703 | 487.74739   | 456.84522   | CNTL/HVPT.BCMON |
|  702 | Control     | 3949230.53903 | 1380130.36728 | 490.06633   | 459.07230   | CNTL/HVPT.ALMON |
|  703 | Adjusted    | 3969263.38809 | 1350260.85091 | 489.31767   | 458.18912   | CNTL/HVPT.BCMON |
|  704 | Adjusted    | 3947075.41180 | 1333084.65809 | 579.34802   | 547.86515   | CNTL/HCPT.ALCAP |
|  705 | Adjusted    | 3971376.33223 | 1357412.47709 | 553.84594   | 522.80597   | CNTL/HVPT.BCMON |
|  706 | Control     | 3931066.97509 | 1429017.38329 | 525.45798   | 494.33271   | CNTL/HVPT.BCMON |
|  707 | Control     | 3924815.06847 | 1428047.05091 | 528.27448   | 497.06063   | CNTL/HCPT.BCMON |
|  708 | Control     | 3920927.55885 | 1441394.26674 | 557.22116   | 525.86952   | CNTL/HVPT.ALMON |
|  709 | Adjusted    | 3983144.20855 | 1420167.38735 | 642.15174   | 611.32175   | CNTL/HCPT.ALMON |
|  729 | Adjusted    | 3945308.16549 | 1456120.72917 | 562.57286   | 531.40166   | CNTL/HVPT.ALMON |
|  734 | Adjusted    | 3908409.97610 | 1464435.63516 | 565.12427   | 533.44782   | CNTL/HVPT.ALMON |
|  741 | Adjusted    | 4004587.86836 | 1385264.26926 | 752.27131   | 721.37570   | CNTL/HVPT.BCMON |

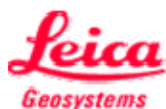

## Processing Summary

### 1127.60548.01 FNSB LiDAR Mapping STS01

---

#### Project Information

---

|                           |                                        |
|---------------------------|----------------------------------------|
| Project name:             | 1127.60548.01 FNSB LiDAR Mapping STS01 |
| Date created:             | 04/22/2010 00:21:31                    |
| Time zone:                | -8h 00'                                |
| Coordinate system name:   | AK Zone 3 NAD83 Geoid09                |
| Application software:     | LEICA Geo Office 5.0                   |
| Start date and time:      | 04/21/2010 07:29:20                    |
| End date and time:        | 04/24/2010 17:30:25                    |
| Manually occupied points: | 139                                    |
| Processing kernel:        | PSI-Pro 2.0                            |
| Processed:                | 04/25/2010 22:18:07                    |

---

#### Processing Parameters

---

| Parameters                                 | Selected  |
|--------------------------------------------|-----------|
| Cut-off angle:                             | 13°       |
| Ephemeris type:                            | Broadcast |
| Solution type:                             | Automatic |
| GNSS type:                                 | Automatic |
| Frequency:                                 | Automatic |
| Fix ambiguities up to:                     | 80 km     |
| Min. duration for float solution (static): | 5' 00"    |
| Sampling rate:                             | Use all   |
| Tropospheric model:                        | Hopfield  |
| Ionospheric model:                         | Automatic |
| Use stochastic modelling:                  | Yes       |
| Min. distance:                             | 8 km      |
| Ionospheric activity:                      | Automatic |

---

#### Baseline Overview

---

|                  |                       |                      |
|------------------|-----------------------|----------------------|
| <b>551 - 1</b>   | <b>Reference: 551</b> | <b>Rover: 1</b>      |
| Coordinates:     |                       |                      |
| Latitude:        | 64° 48' 50.38170" N   | 64° 45' 28.83428" N  |
| Longitude:       | 147° 51' 08.10888" W  | 147° 13' 16.86415" W |
| Ellip. Hgt:      | 462.53516 fts         | 550.31586 fts        |
| Solution type:   | Phase: all fix        |                      |
| GNSS type:       | GPS                   |                      |
| Frequency:       | IonoFree (L3)         |                      |
| Ambiguity:       | Yes                   |                      |
| <b>551 - 701</b> | <b>Reference: 551</b> | <b>Rover: 701</b>    |

|                  |                       |                      |
|------------------|-----------------------|----------------------|
| Coordinates:     |                       |                      |
| Latitude:        | 64° 48' 50.38170" N   | 64° 48' 40.89406" N  |
| Longitude:       | 147° 51' 08.10888" W  | 147° 34' 35.27404" W |
| Ellip. Hgt:      | 462.53516 fts         | 486.65172 fts        |
| Solution type:   | Float                 |                      |
| GNSS type:       | GPS                   |                      |
| Frequency:       | L1 and L2             |                      |
| Ambiguity:       | No                    |                      |
| <b>551 - 702</b> | <b>Reference: 551</b> | <b>Rover: 702</b>    |
| Coordinates:     |                       |                      |
| Latitude:        | 64° 48' 50.38170" N   | 64° 47' 49.58460" N  |
| Longitude:       | 147° 51' 08.10888" W  | 147° 40' 09.75184" W |
| Ellip. Hgt:      | 462.53516 fts         | 490.10450 fts        |
| Solution type:   | Phase: all fix        |                      |
| GNSS type:       | GPS                   |                      |
| Frequency:       | L1 and L2             |                      |
| Ambiguity:       | Yes                   |                      |
| <b>702 - 701</b> | <b>Reference: 702</b> | <b>Rover: 701</b>    |
| Coordinates:     |                       |                      |
| Latitude:        | 64° 47' 49.58460" N   | 64° 48' 40.88790" N  |
| Longitude:       | 147° 40' 09.75184" W  | 147° 34' 35.30800" W |
| Ellip. Hgt:      | 490.10450 fts         | 487.75821 fts        |
| Solution type:   | Phase: all fix        |                      |
| GNSS type:       | GPS                   |                      |
| Frequency:       | L1 and L2             |                      |
| Ambiguity:       | Yes                   |                      |
| <b>551 - 552</b> | <b>Reference: 551</b> | <b>Rover: 552</b>    |
| Coordinates:     |                       |                      |
| Latitude:        | 64° 48' 50.38170" N   | 64° 51' 48.48987" N  |
| Longitude:       | 147° 51' 08.10888" W  | 147° 38' 34.60198" W |
| Ellip. Hgt:      | 462.53516 fts         | 1131.51378 fts       |
| Solution type:   | Phase: all fix        |                      |
| GNSS type:       | GPS                   |                      |
| Frequency:       | L1 and L2             |                      |
| Ambiguity:       | Yes                   |                      |
| <b>1 - 729</b>   | <b>Reference: 1</b>   | <b>Rover: 729</b>    |
| Coordinates:     |                       |                      |
| Latitude:        | 64° 45' 28.83428" N   | 64° 47' 27.82474" N  |
| Longitude:       | 147° 13' 16.86415" W  | 147° 10' 54.06641" W |
| Ellip. Hgt:      | 550.31586 fts         | 562.63096 fts        |
| Solution type:   | Phase: all fix        |                      |
| GNSS type:       | GPS                   |                      |
| Frequency:       | L1 and L2             |                      |
| Ambiguity:       | Yes                   |                      |
| <b>701 - 552</b> | <b>Reference: 701</b> | <b>Rover: 552</b>    |

|                  |                       |                      |
|------------------|-----------------------|----------------------|
| Coordinates:     |                       |                      |
| Latitude:        | 64° 48' 40.88790" N   | 64° 51' 48.49073" N  |
| Longitude:       | 147° 34' 35.30800" W  | 147° 38' 34.60217" W |
| Ellip. Hgt:      | 487.75821 fts         | 1131.43931 fts       |
| Solution type:   | Phase: all fix        |                      |
| GNSS type:       | GPS                   |                      |
| Frequency:       | L1 and L2             |                      |
| Ambiguity:       | Yes                   |                      |
| <b>1 - 702</b>   | <b>Reference: 1</b>   | <b>Rover: 702</b>    |
| Coordinates:     |                       |                      |
| Latitude:        | 64° 45' 28.83428" N   | 64° 47' 49.58439" N  |
| Longitude:       | 147° 13' 16.86415" W  | 147° 40' 09.75230" W |
| Ellip. Hgt:      | 550.31586 fts         | 490.04636 fts        |
| Solution type:   | Phase: all fix        |                      |
| GNSS type:       | GPS                   |                      |
| Frequency:       | IonoFree (L3)         |                      |
| Ambiguity:       | Yes                   |                      |
| <b>702 - 552</b> | <b>Reference: 702</b> | <b>Rover: 552</b>    |
| Coordinates:     |                       |                      |
| Latitude:        | 64° 47' 49.58460" N   | 64° 51' 48.48987" N  |
| Longitude:       | 147° 40' 09.75184" W  | 147° 38' 34.60195" W |
| Ellip. Hgt:      | 490.10450 fts         | 1131.51447 fts       |
| Solution type:   | Phase: all fix        |                      |
| GNSS type:       | GPS                   |                      |
| Frequency:       | L1 and L2             |                      |
| Ambiguity:       | Yes                   |                      |
| <b>1 - 729</b>   | <b>Reference: 1</b>   | <b>Rover: 729</b>    |
| Coordinates:     |                       |                      |
| Latitude:        | 64° 45' 28.83428" N   | 64° 47' 27.82467" N  |
| Longitude:       | 147° 13' 16.86415" W  | 147° 10' 54.06654" W |
| Ellip. Hgt:      | 550.31586 fts         | 562.58975 fts        |
| Solution type:   | Phase: all fix        |                      |
| GNSS type:       | GPS                   |                      |
| Frequency:       | L1 and L2             |                      |
| Ambiguity:       | Yes                   |                      |
| <b>1 - 701</b>   | <b>Reference: 1</b>   | <b>Rover: 701</b>    |
| Coordinates:     |                       |                      |
| Latitude:        | 64° 45' 28.83428" N   | 64° 48' 40.88730" N  |
| Longitude:       | 147° 13' 16.86415" W  | 147° 34' 35.30836" W |
| Ellip. Hgt:      | 550.31586 fts         | 487.73659 fts        |
| Solution type:   | Phase: all fix        |                      |
| GNSS type:       | GPS                   |                      |
| Frequency:       | IonoFree (L3)         |                      |
| Ambiguity:       | Yes                   |                      |
| <b>551 - 709</b> | <b>Reference: 551</b> | <b>Rover: 709</b>    |

|                  |                       |                      |
|------------------|-----------------------|----------------------|
| Coordinates:     |                       |                      |
| Latitude:        | 64° 48' 50.38170" N   | 64° 53' 32.88214" N  |
| Longitude:       | 147° 51' 08.10888" W  | 147° 25' 03.24325" W |
| Ellip. Hgt:      | 462.53516 fts         | 641.05334 fts        |
| Solution type:   | Phase: all fix        |                      |
| GNSS type:       | GPS                   |                      |
| Frequency:       | IonoFree (L3)         |                      |
| Ambiguity:       | Yes                   |                      |
| <b>702 - 709</b> | <b>Reference: 702</b> | <b>Rover: 709</b>    |
| Coordinates:     |                       |                      |
| Latitude:        | 64° 47' 49.58460" N   | 64° 53' 32.88232" N  |
| Longitude:       | 147° 40' 09.75184" W  | 147° 25' 03.24286" W |
| Ellip. Hgt:      | 490.10450 fts         | 641.11972 fts        |
| Solution type:   | Phase: all fix        |                      |
| GNSS type:       | GPS                   |                      |
| Frequency:       | IonoFree (L3)         |                      |
| Ambiguity:       | Yes                   |                      |
| <b>701 - 709</b> | <b>Reference: 701</b> | <b>Rover: 709</b>    |
| Coordinates:     |                       |                      |
| Latitude:        | 64° 48' 40.88790" N   | 64° 53' 32.88292" N  |
| Longitude:       | 147° 34' 35.30800" W  | 147° 25' 03.24315" W |
| Ellip. Hgt:      | 487.75821 fts         | 641.01112 fts        |
| Solution type:   | Phase: all fix        |                      |
| GNSS type:       | GPS                   |                      |
| Frequency:       | L1 and L2             |                      |
| Ambiguity:       | Yes                   |                      |
| <b>552 - 709</b> | <b>Reference: 552</b> | <b>Rover: 709</b>    |
| Coordinates:     |                       |                      |
| Latitude:        | 64° 51' 48.48988" N   | 64° 53' 32.88260" N  |
| Longitude:       | 147° 38' 34.60197" W  | 147° 25' 03.24289" W |
| Ellip. Hgt:      | 1131.51230 fts        | 641.04688 fts        |
| Solution type:   | Phase: all fix        |                      |
| GNSS type:       | GPS                   |                      |
| Frequency:       | L1 and L2             |                      |
| Ambiguity:       | Yes                   |                      |
| <b>729 - 706</b> | <b>Reference: 729</b> | <b>Rover: 706</b>    |
| Coordinates:     |                       |                      |
| Latitude:        | 64° 47' 27.82470" N   | 64° 45' 02.34373" N  |
| Longitude:       | 147° 10' 54.06648" W  | 147° 21' 12.46555" W |
| Ellip. Hgt:      | 562.60888 fts         | 525.62815 fts        |
| Solution type:   | Phase: all fix        |                      |
| GNSS type:       | GPS                   |                      |
| Frequency:       | L1 and L2             |                      |
| Ambiguity:       | Yes                   |                      |
| <b>1 - 552</b>   | <b>Reference: 1</b>   | <b>Rover: 552</b>    |

|                |                      |                      |
|----------------|----------------------|----------------------|
| Coordinates:   |                      |                      |
| Latitude:      | 64° 45' 28.83428" N  | 64° 51' 48.48973" N  |
| Longitude:     | 147° 13' 16.86415" W | 147° 38' 34.60217" W |
| Ellip. Hgt:    | 550.31586 fts        | 1131.51713 fts       |
| Solution type: | Phase: all fix       |                      |
| GNSS type:     | GPS                  |                      |
| Frequency:     | IonoFree (L3)        |                      |
| Ambiguity:     | Yes                  |                      |
| <b>1 - 709</b> | <b>Reference: 1</b>  | <b>Rover: 709</b>    |
| Coordinates:   |                      |                      |
| Latitude:      | 64° 45' 28.83428" N  | 64° 53' 32.88210" N  |
| Longitude:     | 147° 13' 16.86415" W | 147° 25' 03.24335" W |
| Ellip. Hgt:    | 550.31586 fts        | 641.06043 fts        |
| Solution type: | Phase: all fix       |                      |
| GNSS type:     | GPS                  |                      |
| Frequency:     | IonoFree (L3)        |                      |
| Ambiguity:     | Yes                  |                      |
| <b>1 - 706</b> | <b>Reference: 1</b>  | <b>Rover: 706</b>    |
| Coordinates:   |                      |                      |
| Latitude:      | 64° 45' 28.83428" N  | 64° 45' 02.34369" N  |
| Longitude:     | 147° 13' 16.86415" W | 147° 21' 12.46570" W |
| Ellip. Hgt:    | 550.31586 fts        | 525.62674 fts        |
| Solution type: | Phase: all fix       |                      |
| GNSS type:     | GPS                  |                      |
| Frequency:     | L1 and L2            |                      |
| Ambiguity:     | Yes                  |                      |
| <b>1 - 729</b> | <b>Reference: 1</b>  | <b>Rover: 729</b>    |
| Coordinates:   |                      |                      |
| Latitude:      | 64° 45' 28.83428" N  | 64° 47' 27.82465" N  |
| Longitude:     | 147° 13' 16.86415" W | 147° 10' 54.06656" W |
| Ellip. Hgt:    | 550.31586 fts        | 562.61036 fts        |
| Solution type: | Phase: all fix       |                      |
| GNSS type:     | GPS                  |                      |
| Frequency:     | L1 and L2            |                      |
| Ambiguity:     | Yes                  |                      |
| <b>1 - 552</b> | <b>Reference: 1</b>  | <b>Rover: 552</b>    |
| Coordinates:   |                      |                      |
| Latitude:      | 64° 45' 28.83428" N  | 64° 51' 48.48970" N  |
| Longitude:     | 147° 13' 16.86415" W | 147° 38' 34.60209" W |
| Ellip. Hgt:    | 550.31586 fts        | 1131.47192 fts       |
| Solution type: | Phase: all fix       |                      |
| GNSS type:     | GPS                  |                      |
| Frequency:     | IonoFree (L3)        |                      |
| Ambiguity:     | Yes                  |                      |
| <b>1 - 708</b> | <b>Reference: 1</b>  | <b>Rover: 708</b>    |

|                  |                       |                      |
|------------------|-----------------------|----------------------|
| Coordinates:     |                       |                      |
| Latitude:        | 64° 45' 28.83428" N   | 64° 43' 25.09188" N  |
| Longitude:       | 147° 13' 16.86415" W  | 147° 16' 22.58853" W |
| Ellip. Hgt:      | 550.31586 fts         | 557.25814 fts        |
| Solution type:   | Phase: all fix        |                      |
| GNSS type:       | GPS                   |                      |
| Frequency:       | L1 and L2             |                      |
| Ambiguity:       | Yes                   |                      |
| <b>1 - 729</b>   | <b>Reference: 1</b>   | <b>Rover: 729</b>    |
| Coordinates:     |                       |                      |
| Latitude:        | 64° 45' 28.83428" N   | 64° 47' 27.82469" N  |
| Longitude:       | 147° 13' 16.86415" W  | 147° 10' 54.06657" W |
| Ellip. Hgt:      | 550.31586 fts         | 562.60120 fts        |
| Solution type:   | Phase: all fix        |                      |
| GNSS type:       | GPS                   |                      |
| Frequency:       | L1 and L2             |                      |
| Ambiguity:       | Yes                   |                      |
| <b>729 - 708</b> | <b>Reference: 729</b> | <b>Rover: 708</b>    |
| Coordinates:     |                       |                      |
| Latitude:        | 64° 47' 27.82470" N   | 64° 43' 25.09190" N  |
| Longitude:       | 147° 10' 54.06648" W  | 147° 16' 22.58845" W |
| Ellip. Hgt:      | 562.60888 fts         | 557.26890 fts        |
| Solution type:   | Phase: all fix        |                      |
| GNSS type:       | GPS                   |                      |
| Frequency:       | L1 and L2             |                      |
| Ambiguity:       | Yes                   |                      |
| <b>551 - 704</b> | <b>Reference: 551</b> | <b>Rover: 704</b>    |
| Coordinates:     |                       |                      |
| Latitude:        | 64° 48' 50.38170" N   | 64° 47' 15.07646" N  |
| Longitude:       | 147° 51' 08.10888" W  | 147° 58' 13.72322" W |
| Ellip. Hgt:      | 462.53516 fts         | 579.37017 fts        |
| Solution type:   | Phase: all fix        |                      |
| GNSS type:       | GPS                   |                      |
| Frequency:       | L1 and L2             |                      |
| Ambiguity:       | Yes                   |                      |
| <b>551 - 703</b> | <b>Reference: 551</b> | <b>Rover: 703</b>    |
| Coordinates:     |                       |                      |
| Latitude:        | 64° 48' 50.38170" N   | 64° 50' 58.46939" N  |
| Longitude:       | 147° 51' 08.10888" W  | 147° 51' 52.60869" W |
| Ellip. Hgt:      | 462.53516 fts         | 489.34023 fts        |
| Solution type:   | Phase: all fix        |                      |
| GNSS type:       | GPS                   |                      |
| Frequency:       | L1 and L2             |                      |
| Ambiguity:       | Yes                   |                      |
| <b>704 - 703</b> | <b>Reference: 704</b> | <b>Rover: 703</b>    |

|                  |                       |                      |
|------------------|-----------------------|----------------------|
| Coordinates:     |                       |                      |
| Latitude:        | 64° 47' 15.07646" N   | 64° 50' 58.46939" N  |
| Longitude:       | 147° 58' 13.72322" W  | 147° 51' 52.60871" W |
| Ellip. Hgt:      | 579.37017 fts         | 489.33754 fts        |
| Solution type:   | Phase: all fix        |                      |
| GNSS type:       | GPS                   |                      |
| Frequency:       | L1 and L2             |                      |
| Ambiguity:       | Yes                   |                      |
| <b>1 - 729</b>   | <b>Reference: 1</b>   | <b>Rover: 729</b>    |
| Coordinates:     |                       |                      |
| Latitude:        | 64° 45' 28.83428" N   | 64° 47' 27.82464" N  |
| Longitude:       | 147° 13' 16.86415" W  | 147° 10' 54.06655" W |
| Ellip. Hgt:      | 550.31586 fts         | 562.58710 fts        |
| Solution type:   | Phase: all fix        |                      |
| GNSS type:       | GPS                   |                      |
| Frequency:       | L1 and L2             |                      |
| Ambiguity:       | Yes                   |                      |
| <b>552 - 729</b> | <b>Reference: 552</b> | <b>Rover: 729</b>    |
| Coordinates:     |                       |                      |
| Latitude:        | 64° 51' 48.48988" N   | 64° 47' 27.82474" N  |
| Longitude:       | 147° 38' 34.60197" W  | 147° 10' 54.06613" W |
| Ellip. Hgt:      | 1131.51230 fts        | 562.57063 fts        |
| Solution type:   | Phase: all fix        |                      |
| GNSS type:       | GPS                   |                      |
| Frequency:       | IonoFree (L3)         |                      |
| Ambiguity:       | Yes                   |                      |
| <b>1 - 708</b>   | <b>Reference: 1</b>   | <b>Rover: 708</b>    |
| Coordinates:     |                       |                      |
| Latitude:        | 64° 45' 28.83428" N   | 64° 43' 25.09182" N  |
| Longitude:       | 147° 13' 16.86415" W  | 147° 16' 22.58877" W |
| Ellip. Hgt:      | 550.31586 fts         | 557.28773 fts        |
| Solution type:   | Phase: all fix        |                      |
| GNSS type:       | GPS                   |                      |
| Frequency:       | L1 and L2             |                      |
| Ambiguity:       | Yes                   |                      |
| <b>729 - 708</b> | <b>Reference: 729</b> | <b>Rover: 708</b>    |
| Coordinates:     |                       |                      |
| Latitude:        | 64° 47' 27.82470" N   | 64° 43' 25.09188" N  |
| Longitude:       | 147° 10' 54.06648" W  | 147° 16' 22.58868" W |
| Ellip. Hgt:      | 562.60888 fts         | 557.28698 fts        |
| Solution type:   | Phase: all fix        |                      |
| GNSS type:       | GPS                   |                      |
| Frequency:       | L1 and L2             |                      |
| Ambiguity:       | Yes                   |                      |
| <b>706 - 708</b> | <b>Reference: 706</b> | <b>Rover: 708</b>    |



|                  |                       |                      |
|------------------|-----------------------|----------------------|
| Coordinates:     |                       |                      |
| Latitude:        | 64° 45' 02.34371" N   | 64° 43' 25.09188" N  |
| Longitude:       | 147° 21' 12.46563" W  | 147° 16' 22.58866" W |
| Ellip. Hgt:      | 525.62739 fts         | 557.28980 fts        |
| Solution type:   | Phase: all fix        |                      |
| GNSS type:       | GPS                   |                      |
| Frequency:       | L1 and L2             |                      |
| Ambiguity:       | Yes                   |                      |
| <b>551 - 705</b> | <b>Reference: 551</b> | <b>Rover: 705</b>    |
| Coordinates:     |                       |                      |
| Latitude:        | 64° 48' 50.38170" N   | 64° 51' 21.30424" N  |
| Longitude:       | 147° 51' 08.10888" W  | 147° 49' 08.66629" W |
| Ellip. Hgt:      | 462.53516 fts         | 553.86684 fts        |
| Solution type:   | Phase: all fix        |                      |
| GNSS type:       | GPS                   |                      |
| Frequency:       | L1 and L2             |                      |
| Ambiguity:       | Yes                   |                      |
| <b>704 - 705</b> | <b>Reference: 704</b> | <b>Rover: 705</b>    |
| Coordinates:     |                       |                      |
| Latitude:        | 64° 47' 15.07646" N   | 64° 51' 21.30426" N  |
| Longitude:       | 147° 58' 13.72322" W  | 147° 49' 08.66633" W |
| Ellip. Hgt:      | 579.37017 fts         | 553.86533 fts        |
| Solution type:   | Phase: all fix        |                      |
| GNSS type:       | GPS                   |                      |
| Frequency:       | L1 and L2             |                      |
| Ambiguity:       | Yes                   |                      |
| <b>703 - 705</b> | <b>Reference: 703</b> | <b>Rover: 705</b>    |
| Coordinates:     |                       |                      |
| Latitude:        | 64° 50' 58.46939" N   | 64° 51' 21.30424" N  |
| Longitude:       | 147° 51' 52.60870" W  | 147° 49' 08.66627" W |
| Ellip. Hgt:      | 489.33931 fts         | 553.86736 fts        |
| Solution type:   | Phase: all fix        |                      |
| GNSS type:       | GPS                   |                      |
| Frequency:       | L1 and L2             |                      |
| Ambiguity:       | Yes                   |                      |
| <b>1 - 734</b>   | <b>Reference: 1</b>   | <b>Rover: 734</b>    |
| Coordinates:     |                       |                      |
| Latitude:        | 64° 45' 28.83428" N   | 64° 41' 26.19579" N  |
| Longitude:       | 147° 13' 16.86415" W  | 147° 07' 27.06942" W |
| Ellip. Hgt:      | 550.31586 fts         | 565.16905 fts        |
| Solution type:   | Phase: all fix        |                      |
| GNSS type:       | GPS                   |                      |
| Frequency:       | L1 and L2             |                      |
| Ambiguity:       | Yes                   |                      |
| <b>552 - 734</b> | <b>Reference: 552</b> | <b>Rover: 734</b>    |

|                  |                       |                      |
|------------------|-----------------------|----------------------|
| Coordinates:     |                       |                      |
| Latitude:        | 64° 51' 48.48988" N   | 64° 41' 26.19577" N  |
| Longitude:       | 147° 38' 34.60197" W  | 147° 07' 27.06889" W |
| Ellip. Hgt:      | 1131.51230 fts        | 565.13686 fts        |
| Solution type:   | Phase: all fix        |                      |
| GNSS type:       | GPS                   |                      |
| Frequency:       | IonoFree (L3)         |                      |
| Ambiguity:       | Yes                   |                      |
| <b>551 - 403</b> | <b>Reference: 551</b> | <b>Rover: 403</b>    |
| Coordinates:     |                       |                      |
| Latitude:        | 64° 48' 50.38170" N   | 64° 57' 09.00156" N  |
| Longitude:       | 147° 51' 08.10888" W  | 147° 37' 19.95393" W |
| Ellip. Hgt:      | 462.53516 fts         | 770.15256 fts        |
| Solution type:   | Phase: all fix        |                      |
| GNSS type:       | GPS                   |                      |
| Frequency:       | IonoFree (L3)         |                      |
| Ambiguity:       | Yes                   |                      |
| <b>1 - 403</b>   | <b>Reference: 1</b>   | <b>Rover: 403</b>    |
| Coordinates:     |                       |                      |
| Latitude:        | 64° 45' 28.83428" N   | 64° 57' 09.00153" N  |
| Longitude:       | 147° 13' 16.86415" W  | 147° 37' 19.95384" W |
| Ellip. Hgt:      | 550.31586 fts         | 770.16299 fts        |
| Solution type:   | Phase: all fix        |                      |
| GNSS type:       | GPS                   |                      |
| Frequency:       | IonoFree (L3)         |                      |
| Ambiguity:       | Yes                   |                      |
| <b>552 - 704</b> | <b>Reference: 552</b> | <b>Rover: 704</b>    |
| Coordinates:     |                       |                      |
| Latitude:        | 64° 51' 48.48988" N   | 64° 47' 15.07656" N  |
| Longitude:       | 147° 38' 34.60197" W  | 147° 58' 13.72333" W |
| Ellip. Hgt:      | 1131.51230 fts        | 579.36157 fts        |
| Solution type:   | Phase: all fix        |                      |
| GNSS type:       | GPS                   |                      |
| Frequency:       | IonoFree (L3)         |                      |
| Ambiguity:       | Yes                   |                      |
| <b>552 - 703</b> | <b>Reference: 552</b> | <b>Rover: 703</b>    |
| Coordinates:     |                       |                      |
| Latitude:        | 64° 51' 48.48988" N   | 64° 50' 58.46939" N  |
| Longitude:       | 147° 38' 34.60197" W  | 147° 51' 52.60881" W |
| Ellip. Hgt:      | 1131.51230 fts        | 489.33213 fts        |
| Solution type:   | Phase: all fix        |                      |
| GNSS type:       | GPS                   |                      |
| Frequency:       | L1 and L2             |                      |
| Ambiguity:       | Yes                   |                      |
| <b>552 - 705</b> | <b>Reference: 552</b> | <b>Rover: 705</b>    |

|                  |                       |                      |
|------------------|-----------------------|----------------------|
| Coordinates:     |                       |                      |
| Latitude:        | 64° 51' 48.48988" N   | 64° 51' 21.30427" N  |
| Longitude:       | 147° 38' 34.60197" W  | 147° 49' 08.66640" W |
| Ellip. Hgt:      | 1131.51230 fts        | 553.86100 fts        |
| Solution type:   | Phase: all fix        |                      |
| GNSS type:       | GPS                   |                      |
| Frequency:       | L1 and L2             |                      |
| Ambiguity:       | Yes                   |                      |
| <b>551 - 741</b> | <b>Reference: 551</b> | <b>Rover: 741</b>    |
| Coordinates:     |                       |                      |
| Latitude:        | 64° 48' 50.38170" N   | 64° 56' 55.55673" N  |
| Longitude:       | 147° 51' 08.10888" W  | 147° 38' 44.50500" W |
| Ellip. Hgt:      | 462.53516 fts         | 752.28429 fts        |
| Solution type:   | Phase: all fix        |                      |
| GNSS type:       | GPS                   |                      |
| Frequency:       | IonoFree (L3)         |                      |
| Ambiguity:       | Yes                   |                      |
| <b>1 - 741</b>   | <b>Reference: 1</b>   | <b>Rover: 741</b>    |
| Coordinates:     |                       |                      |
| Latitude:        | 64° 45' 28.83428" N   | 64° 56' 55.55615" N  |
| Longitude:       | 147° 13' 16.86415" W  | 147° 38' 44.49849" W |
| Ellip. Hgt:      | 550.31586 fts         | 752.53993 fts        |
| Solution type:   | Phase: all fix        |                      |
| GNSS type:       | GPS                   |                      |
| Frequency:       | IonoFree (L3)         |                      |
| Ambiguity:       | Yes                   |                      |
| <b>403 - 741</b> | <b>Reference: 403</b> | <b>Rover: 741</b>    |
| Coordinates:     |                       |                      |
| Latitude:        | 64° 57' 09.00154" N   | 64° 56' 55.55669" N  |
| Longitude:       | 147° 37' 19.95389" W  | 147° 38' 44.50522" W |
| Ellip. Hgt:      | 770.15778 fts         | 752.23393 fts        |
| Solution type:   | Phase: all fix        |                      |
| GNSS type:       | GPS                   |                      |
| Frequency:       | L1 and L2             |                      |
| Ambiguity:       | Yes                   |                      |
| <b>1 - 708</b>   | <b>Reference: 1</b>   | <b>Rover: 708</b>    |
| Coordinates:     |                       |                      |
| Latitude:        | 64° 45' 28.83428" N   | 64° 43' 25.09178" N  |
| Longitude:       | 147° 13' 16.86415" W  | 147° 16' 22.58840" W |
| Ellip. Hgt:      | 550.31586 fts         | 557.26854 fts        |
| Solution type:   | Phase: all fix        |                      |
| GNSS type:       | GPS                   |                      |
| Frequency:       | L1 and L2             |                      |
| Ambiguity:       | Yes                   |                      |
| <b>552 - 708</b> | <b>Reference: 552</b> | <b>Rover: 708</b>    |

|              |                      |                      |
|--------------|----------------------|----------------------|
| Coordinates: |                      |                      |
| Latitude:    | 64° 51' 48.48988" N  | 64° 43' 25.09175" N  |
| Longitude:   | 147° 38' 34.60197" W | 147° 16' 22.58827" W |
| Ellip. Hgt:  | 1131.51230 fts       | 557.29373 fts        |

|                |                |
|----------------|----------------|
| Solution type: | Phase: all fix |
| GNSS type:     | GPS            |
| Frequency:     | IonoFree (L3)  |
| Ambiguity:     | Yes            |

**729 - 708****Reference: 729****Rover: 708**

|              |                      |                      |
|--------------|----------------------|----------------------|
| Coordinates: |                      |                      |
| Latitude:    | 64° 47' 27.82470" N  | 64° 43' 25.09178" N  |
| Longitude:   | 147° 10' 54.06648" W | 147° 16' 22.58839" W |
| Ellip. Hgt:  | 562.60888 fts        | 557.24780 fts        |

|                |                |
|----------------|----------------|
| Solution type: | Phase: all fix |
| GNSS type:     | GPS            |
| Frequency:     | L1 and L2      |
| Ambiguity:     | Yes            |

**729 - 734****Reference: 729****Rover: 734**

|              |                      |                      |
|--------------|----------------------|----------------------|
| Coordinates: |                      |                      |
| Latitude:    | 64° 47' 27.82470" N  | 64° 41' 26.19582" N  |
| Longitude:   | 147° 10' 54.06648" W | 147° 07' 27.06941" W |
| Ellip. Hgt:  | 562.60888 fts        | 565.16337 fts        |

|                |                |
|----------------|----------------|
| Solution type: | Phase: all fix |
| GNSS type:     | GPS            |
| Frequency:     | L1 and L2      |
| Ambiguity:     | Yes            |

**701 - 704****Reference: 701****Rover: 704**

|              |                      |                      |
|--------------|----------------------|----------------------|
| Coordinates: |                      |                      |
| Latitude:    | 64° 48' 40.88790" N  | 64° 47' 15.08911" N  |
| Longitude:   | 147° 34' 35.30800" W | 147° 58' 13.71809" W |
| Ellip. Hgt:  | 487.75821 fts        | 577.68684 fts        |

|                |               |
|----------------|---------------|
| Solution type: | Float         |
| GNSS type:     | GPS           |
| Frequency:     | IonoFree (L3) |
| Ambiguity:     | No            |

**551 - 552****Reference: 551****Rover: 552**

|              |                      |                      |
|--------------|----------------------|----------------------|
| Coordinates: |                      |                      |
| Latitude:    | 64° 48' 50.38170" N  | 64° 51' 48.48976" N  |
| Longitude:   | 147° 51' 08.10888" W | 147° 38' 34.60168" W |
| Ellip. Hgt:  | 462.53516 fts        | 1131.48819 fts       |

|                |                |
|----------------|----------------|
| Solution type: | Phase: all fix |
| GNSS type:     | GPS            |
| Frequency:     | L1 and L2      |
| Ambiguity:     | Yes            |

**701 - 703****Reference: 701****Rover: 703**

|                  |                       |                      |
|------------------|-----------------------|----------------------|
| Coordinates:     |                       |                      |
| Latitude:        | 64° 48' 40.88790" N   | 64° 50' 58.46950" N  |
| Longitude:       | 147° 34' 35.30800" W  | 147° 51' 52.60536" W |
| Ellip. Hgt:      | 487.75821 fts         | 489.41995 fts        |
| Solution type:   | Float                 |                      |
| GNSS type:       | GPS                   |                      |
| Frequency:       | L1 and L2             |                      |
| Ambiguity:       | No                    |                      |
| <b>701 - 705</b> | <b>Reference: 701</b> | <b>Rover: 705</b>    |
| Coordinates:     |                       |                      |
| Latitude:        | 64° 48' 40.88790" N   | 64° 51' 21.31759" N  |
| Longitude:       | 147° 34' 35.30800" W  | 147° 49' 08.65928" W |
| Ellip. Hgt:      | 487.75821 fts         | 552.65191 fts        |
| Solution type:   | Phase: all fix        |                      |
| GNSS type:       | GPS                   |                      |
| Frequency:       | L1 and L2             |                      |
| Ambiguity:       | Yes                   |                      |
| <b>702 - 704</b> | <b>Reference: 702</b> | <b>Rover: 704</b>    |
| Coordinates:     |                       |                      |
| Latitude:        | 64° 47' 49.58460" N   | 64° 47' 15.07641" N  |
| Longitude:       | 147° 40' 09.75184" W  | 147° 58' 13.72339" W |
| Ellip. Hgt:      | 490.10450 fts         | 579.38227 fts        |
| Solution type:   | Phase: all fix        |                      |
| GNSS type:       | GPS                   |                      |
| Frequency:       | L1 and L2             |                      |
| Ambiguity:       | Yes                   |                      |
| <b>702 - 703</b> | <b>Reference: 702</b> | <b>Rover: 703</b>    |
| Coordinates:     |                       |                      |
| Latitude:        | 64° 47' 49.58460" N   | 64° 50' 58.46936" N  |
| Longitude:       | 147° 40' 09.75184" W  | 147° 51' 52.60881" W |
| Ellip. Hgt:      | 490.10450 fts         | 489.34712 fts        |
| Solution type:   | Phase: all fix        |                      |
| GNSS type:       | GPS                   |                      |
| Frequency:       | L1 and L2             |                      |
| Ambiguity:       | Yes                   |                      |
| <b>552 - 403</b> | <b>Reference: 552</b> | <b>Rover: 403</b>    |
| Coordinates:     |                       |                      |
| Latitude:        | 64° 51' 48.48988" N   | 64° 57' 09.00169" N  |
| Longitude:       | 147° 38' 34.60197" W  | 147° 37' 19.95399" W |
| Ellip. Hgt:      | 1131.51230 fts        | 770.22910 fts        |
| Solution type:   | Phase: all fix        |                      |
| GNSS type:       | GPS                   |                      |
| Frequency:       | L1 and L2             |                      |
| Ambiguity:       | Yes                   |                      |
| <b>708 - 734</b> | <b>Reference: 708</b> | <b>Rover: 734</b>    |

|                  |                       |                      |
|------------------|-----------------------|----------------------|
| Coordinates:     |                       |                      |
| Latitude:        | 64° 43' 25.09186" N   | 64° 41' 26.19584" N  |
| Longitude:       | 147° 16' 22.58856" W  | 147° 07' 27.06959" W |
| Ellip. Hgt:      | 557.27316 fts         | 565.18824 fts        |
| Solution type:   | Phase: all fix        |                      |
| GNSS type:       | GPS                   |                      |
| Frequency:       | L1 and L2             |                      |
| Ambiguity:       | Yes                   |                      |
| <b>702 - 705</b> | <b>Reference: 702</b> | <b>Rover: 705</b>    |
| Coordinates:     |                       |                      |
| Latitude:        | 64° 47' 49.58460" N   | 64° 51' 21.30420" N  |
| Longitude:       | 147° 40' 09.75184" W  | 147° 49' 08.66641" W |
| Ellip. Hgt:      | 490.10450 fts         | 553.86992 fts        |
| Solution type:   | Phase: all fix        |                      |
| GNSS type:       | GPS                   |                      |
| Frequency:       | L1 and L2             |                      |
| Ambiguity:       | Yes                   |                      |
| <b>551 - 708</b> | <b>Reference: 551</b> | <b>Rover: 708</b>    |
| Coordinates:     |                       |                      |
| Latitude:        | 64° 48' 50.38170" N   | 64° 43' 25.09160" N  |
| Longitude:       | 147° 51' 08.10888" W  | 147° 16' 22.58821" W |
| Ellip. Hgt:      | 462.53516 fts         | 557.25174 fts        |
| Solution type:   | Phase: all fix        |                      |
| GNSS type:       | GPS                   |                      |
| Frequency:       | IonoFree (L3)         |                      |
| Ambiguity:       | Yes                   |                      |
| <b>1 - 708</b>   | <b>Reference: 1</b>   | <b>Rover: 708</b>    |
| Coordinates:     |                       |                      |
| Latitude:        | 64° 45' 28.83428" N   | 64° 43' 25.09177" N  |
| Longitude:       | 147° 13' 16.86415" W  | 147° 16' 22.58884" W |
| Ellip. Hgt:      | 550.31586 fts         | 557.27441 fts        |
| Solution type:   | Phase: all fix        |                      |
| GNSS type:       | GPS                   |                      |
| Frequency:       | L1 and L2             |                      |
| Ambiguity:       | Yes                   |                      |
| <b>702 - 708</b> | <b>Reference: 702</b> | <b>Rover: 708</b>    |
| Coordinates:     |                       |                      |
| Latitude:        | 64° 47' 49.58460" N   | 64° 43' 25.09183" N  |
| Longitude:       | 147° 40' 09.75184" W  | 147° 16' 22.58768" W |
| Ellip. Hgt:      | 490.10450 fts         | 557.32047 fts        |
| Solution type:   | Phase: all fix        |                      |
| GNSS type:       | GPS                   |                      |
| Frequency:       | IonoFree (L3)         |                      |
| Ambiguity:       | Yes                   |                      |
| <b>701 - 708</b> | <b>Reference: 701</b> | <b>Rover: 708</b>    |

|                  |                       |                      |
|------------------|-----------------------|----------------------|
| Coordinates:     |                       |                      |
| Latitude:        | 64° 48' 40.88790" N   | 64° 43' 25.08555" N  |
| Longitude:       | 147° 34' 35.30800" W  | 147° 16' 22.57031" W |
| Ellip. Hgt:      | 487.75821 fts         | 557.32261 fts        |
| Solution type:   | Float                 |                      |
| GNSS type:       | GPS                   |                      |
| Frequency:       | IonoFree (L3)         |                      |
| Ambiguity:       | No                    |                      |
| <b>552 - 708</b> | <b>Reference: 552</b> | <b>Rover: 708</b>    |
| Coordinates:     |                       |                      |
| Latitude:        | 64° 51' 48.48988" N   | 64° 43' 25.09179" N  |
| Longitude:       | 147° 38' 34.60197" W  | 147° 16' 22.58796" W |
| Ellip. Hgt:      | 1131.51230 fts        | 557.26595 fts        |
| Solution type:   | Phase: all fix        |                      |
| GNSS type:       | GPS                   |                      |
| Frequency:       | IonoFree (L3)         |                      |
| Ambiguity:       | Yes                   |                      |
| <b>709 - 708</b> | <b>Reference: 709</b> | <b>Rover: 708</b>    |
| Coordinates:     |                       |                      |
| Latitude:        | 64° 53' 32.88242" N   | 64° 43' 25.09196" N  |
| Longitude:       | 147° 25' 03.24303" W  | 147° 16' 22.58796" W |
| Ellip. Hgt:      | 641.05994 fts         | 557.27047 fts        |
| Solution type:   | Phase: all fix        |                      |
| GNSS type:       | GPS                   |                      |
| Frequency:       | IonoFree (L3)         |                      |
| Ambiguity:       | Yes                   |                      |
| <b>552 - 741</b> | <b>Reference: 552</b> | <b>Rover: 741</b>    |
| Coordinates:     |                       |                      |
| Latitude:        | 64° 51' 48.48988" N   | 64° 56' 55.55636" N  |
| Longitude:       | 147° 38' 34.60197" W  | 147° 38' 44.50497" W |
| Ellip. Hgt:      | 1131.51230 fts        | 752.40594 fts        |
| Solution type:   | Float                 |                      |
| GNSS type:       | GPS                   |                      |
| Frequency:       | L1 and L2             |                      |
| Ambiguity:       | No                    |                      |
| <b>709 - 704</b> | <b>Reference: 709</b> | <b>Rover: 704</b>    |
| Coordinates:     |                       |                      |
| Latitude:        | 64° 53' 32.88242" N   | 64° 47' 15.07670" N  |
| Longitude:       | 147° 25' 03.24303" W  | 147° 58' 13.72335" W |
| Ellip. Hgt:      | 641.05994 fts         | 579.35104 fts        |
| Solution type:   | Phase: all fix        |                      |
| GNSS type:       | GPS                   |                      |
| Frequency:       | IonoFree (L3)         |                      |
| Ambiguity:       | Yes                   |                      |
| <b>709 - 703</b> | <b>Reference: 709</b> | <b>Rover: 703</b>    |

|                  |                       |                      |
|------------------|-----------------------|----------------------|
| Coordinates:     |                       |                      |
| Latitude:        | 64° 53' 32.88242" N   | 64° 50' 58.46945" N  |
| Longitude:       | 147° 25' 03.24303" W  | 147° 51' 52.60879" W |
| Ellip. Hgt:      | 641.05994 fts         | 489.32711 fts        |
| Solution type:   | Phase: all fix        |                      |
| GNSS type:       | GPS                   |                      |
| Frequency:       | IonoFree (L3)         |                      |
| Ambiguity:       | Yes                   |                      |
| <b>551 - 707</b> | <b>Reference: 551</b> | <b>Rover: 707</b>    |
| Coordinates:     |                       |                      |
| Latitude:        | 64° 48' 50.38170" N   | 64° 44' 00.61830" N  |
| Longitude:       | 147° 51' 08.10888" W  | 147° 21' 31.73340" W |
| Ellip. Hgt:      | 462.53516 fts         | 528.53152 fts        |
| Solution type:   | Phase: all fix        |                      |
| GNSS type:       | GPS                   |                      |
| Frequency:       | IonoFree (L3)         |                      |
| Ambiguity:       | Yes                   |                      |
| <b>1 - 707</b>   | <b>Reference: 1</b>   | <b>Rover: 707</b>    |
| Coordinates:     |                       |                      |
| Latitude:        | 64° 45' 28.83428" N   | 64° 44' 00.61821" N  |
| Longitude:       | 147° 13' 16.86415" W  | 147° 21' 31.73349" W |
| Ellip. Hgt:      | 550.31586 fts         | 528.56233 fts        |
| Solution type:   | Phase: all fix        |                      |
| GNSS type:       | GPS                   |                      |
| Frequency:       | L1 and L2             |                      |
| Ambiguity:       | Yes                   |                      |
| <b>702 - 707</b> | <b>Reference: 702</b> | <b>Rover: 707</b>    |
| Coordinates:     |                       |                      |
| Latitude:        | 64° 47' 49.58460" N   | 64° 44' 00.61851" N  |
| Longitude:       | 147° 40' 09.75184" W  | 147° 21' 31.73285" W |
| Ellip. Hgt:      | 490.10450 fts         | 528.60140 fts        |
| Solution type:   | Phase: all fix        |                      |
| GNSS type:       | GPS                   |                      |
| Frequency:       | IonoFree (L3)         |                      |
| Ambiguity:       | Yes                   |                      |
| <b>701 - 707</b> | <b>Reference: 701</b> | <b>Rover: 707</b>    |
| Coordinates:     |                       |                      |
| Latitude:        | 64° 48' 40.88790" N   | 64° 44' 00.61870" N  |
| Longitude:       | 147° 34' 35.30800" W  | 147° 21' 31.73326" W |
| Ellip. Hgt:      | 487.75821 fts         | 528.54005 fts        |
| Solution type:   | Phase: all fix        |                      |
| GNSS type:       | GPS                   |                      |
| Frequency:       | L1 and L2             |                      |
| Ambiguity:       | Yes                   |                      |
| <b>552 - 707</b> | <b>Reference: 552</b> | <b>Rover: 707</b>    |



|                  |                       |                      |
|------------------|-----------------------|----------------------|
| Coordinates:     |                       |                      |
| Latitude:        | 64° 51' 48.48988" N   | 64° 44' 00.61848" N  |
| Longitude:       | 147° 38' 34.60197" W  | 147° 21' 31.73314" W |
| Ellip. Hgt:      | 1131.51230 fts        | 528.56171 fts        |
| Solution type:   | Phase: all fix        |                      |
| GNSS type:       | GPS                   |                      |
| Frequency:       | IonoFree (L3)         |                      |
| Ambiguity:       | Yes                   |                      |
| <b>709 - 707</b> | <b>Reference: 709</b> | <b>Rover: 707</b>    |
| Coordinates:     |                       |                      |
| Latitude:        | 64° 53' 32.88242" N   | 64° 44' 00.61856" N  |
| Longitude:       | 147° 25' 03.24303" W  | 147° 21' 31.73315" W |
| Ellip. Hgt:      | 641.05994 fts         | 528.55153 fts        |
| Solution type:   | Phase: all fix        |                      |
| GNSS type:       | GPS                   |                      |
| Frequency:       | IonoFree (L3)         |                      |
| Ambiguity:       | Yes                   |                      |
| <b>709 - 705</b> | <b>Reference: 709</b> | <b>Rover: 705</b>    |
| Coordinates:     |                       |                      |
| Latitude:        | 64° 53' 32.88242" N   | 64° 51' 21.30419" N  |
| Longitude:       | 147° 25' 03.24303" W  | 147° 49' 08.66643" W |
| Ellip. Hgt:      | 641.05994 fts         | 553.84443 fts        |
| Solution type:   | Phase: all fix        |                      |
| GNSS type:       | GPS                   |                      |
| Frequency:       | IonoFree (L3)         |                      |
| Ambiguity:       | Yes                   |                      |
| <b>1 - 704</b>   | <b>Reference: 1</b>   | <b>Rover: 704</b>    |
| Coordinates:     |                       |                      |
| Latitude:        | 64° 45' 28.83428" N   | 64° 47' 15.07646" N  |
| Longitude:       | 147° 13' 16.86415" W  | 147° 58' 13.72332" W |
| Ellip. Hgt:      | 550.31586 fts         | 579.35091 fts        |
| Solution type:   | Phase: all fix        |                      |
| GNSS type:       | GPS                   |                      |
| Frequency:       | IonoFree (L3)         |                      |
| Ambiguity:       | Yes                   |                      |
| <b>708 - 707</b> | <b>Reference: 708</b> | <b>Rover: 707</b>    |
| Coordinates:     |                       |                      |
| Latitude:        | 64° 43' 25.09186" N   | 64° 44' 00.61829" N  |
| Longitude:       | 147° 16' 22.58856" W  | 147° 21' 31.73317" W |
| Ellip. Hgt:      | 557.27316 fts         | 528.56522 fts        |
| Solution type:   | Phase: all fix        |                      |
| GNSS type:       | GPS                   |                      |
| Frequency:       | L1 and L2             |                      |
| Ambiguity:       | Yes                   |                      |
| <b>551 - 729</b> | <b>Reference: 551</b> | <b>Rover: 729</b>    |

|                  |                       |                      |
|------------------|-----------------------|----------------------|
| Coordinates:     |                       |                      |
| Latitude:        | 64° 48' 50.38170" N   | 64° 47' 27.82464" N  |
| Longitude:       | 147° 51' 08.10888" W  | 147° 10' 54.06624" W |
| Ellip. Hgt:      | 462.53516 fts         | 562.63401 fts        |
| Solution type:   | Phase: all fix        |                      |
| GNSS type:       | GPS                   |                      |
| Frequency:       | IonoFree (L3)         |                      |
| Ambiguity:       | Yes                   |                      |
| <b>1 - 729</b>   | <b>Reference: 1</b>   | <b>Rover: 729</b>    |
| Coordinates:     |                       |                      |
| Latitude:        | 64° 45' 28.83428" N   | 64° 47' 27.82472" N  |
| Longitude:       | 147° 13' 16.86415" W  | 147° 10' 54.06657" W |
| Ellip. Hgt:      | 550.31586 fts         | 562.62834 fts        |
| Solution type:   | Phase: all fix        |                      |
| GNSS type:       | GPS                   |                      |
| Frequency:       | L1 and L2             |                      |
| Ambiguity:       | Yes                   |                      |
| <b>702 - 729</b> | <b>Reference: 702</b> | <b>Rover: 729</b>    |
| Coordinates:     |                       |                      |
| Latitude:        | 64° 47' 49.58460" N   | 64° 47' 27.82490" N  |
| Longitude:       | 147° 40' 09.75184" W  | 147° 10' 54.06569" W |
| Ellip. Hgt:      | 490.10450 fts         | 562.69720 fts        |
| Solution type:   | Phase: all fix        |                      |
| GNSS type:       | GPS                   |                      |
| Frequency:       | IonoFree (L3)         |                      |
| Ambiguity:       | Yes                   |                      |
| <b>701 - 729</b> | <b>Reference: 701</b> | <b>Rover: 729</b>    |
| Coordinates:     |                       |                      |
| Latitude:        | 64° 48' 40.88790" N   | 64° 47' 27.82336" N  |
| Longitude:       | 147° 34' 35.30800" W  | 147° 10' 54.04786" W |
| Ellip. Hgt:      | 487.75821 fts         | 563.01272 fts        |
| Solution type:   | Float                 |                      |
| GNSS type:       | GPS                   |                      |
| Frequency:       | IonoFree (L3)         |                      |
| Ambiguity:       | No                    |                      |
| <b>552 - 729</b> | <b>Reference: 552</b> | <b>Rover: 729</b>    |
| Coordinates:     |                       |                      |
| Latitude:        | 64° 51' 48.48988" N   | 64° 47' 27.82485" N  |
| Longitude:       | 147° 38' 34.60197" W  | 147° 10' 54.06590" W |
| Ellip. Hgt:      | 1131.51230 fts        | 562.65865 fts        |
| Solution type:   | Phase: all fix        |                      |
| GNSS type:       | GPS                   |                      |
| Frequency:       | IonoFree (L3)         |                      |
| Ambiguity:       | Yes                   |                      |
| <b>729 - 709</b> | <b>Reference: 729</b> | <b>Rover: 709</b>    |

|                  |                       |                      |
|------------------|-----------------------|----------------------|
| Coordinates:     |                       |                      |
| Latitude:        | 64° 47' 27.82470" N   | 64° 53' 32.88206" N  |
| Longitude:       | 147° 10' 54.06648" W  | 147° 25' 03.24345" W |
| Ellip. Hgt:      | 562.60888 fts         | 641.00915 fts        |
| Solution type:   | Phase: all fix        |                      |
| GNSS type:       | GPS                   |                      |
| Frequency:       | IonoFree (L3)         |                      |
| Ambiguity:       | Yes                   |                      |
| <b>729 - 708</b> | <b>Reference: 729</b> | <b>Rover: 708</b>    |
| Coordinates:     |                       |                      |
| Latitude:        | 64° 47' 27.82470" N   | 64° 43' 25.09174" N  |
| Longitude:       | 147° 10' 54.06648" W  | 147° 16' 22.58882" W |
| Ellip. Hgt:      | 562.60888 fts         | 557.25263 fts        |
| Solution type:   | Phase: all fix        |                      |
| GNSS type:       | GPS                   |                      |
| Frequency:       | L1 and L2             |                      |
| Ambiguity:       | Yes                   |                      |
| <b>1 - 703</b>   | <b>Reference: 1</b>   | <b>Rover: 703</b>    |
| Coordinates:     |                       |                      |
| Latitude:        | 64° 45' 28.83428" N   | 64° 50' 58.46920" N  |
| Longitude:       | 147° 13' 16.86415" W  | 147° 51' 52.60881" W |
| Ellip. Hgt:      | 550.31586 fts         | 489.33108 fts        |
| Solution type:   | Phase: all fix        |                      |
| GNSS type:       | GPS                   |                      |
| Frequency:       | IonoFree (L3)         |                      |
| Ambiguity:       | Yes                   |                      |
| <b>551 - 734</b> | <b>Reference: 551</b> | <b>Rover: 734</b>    |
| Coordinates:     |                       |                      |
| Latitude:        | 64° 48' 50.38170" N   | 64° 41' 26.19560" N  |
| Longitude:       | 147° 51' 08.10888" W  | 147° 07' 27.06890" W |
| Ellip. Hgt:      | 462.53516 fts         | 565.08165 fts        |
| Solution type:   | Phase: all fix        |                      |
| GNSS type:       | GPS                   |                      |
| Frequency:       | IonoFree (L3)         |                      |
| Ambiguity:       | Yes                   |                      |
| <b>1 - 705</b>   | <b>Reference: 1</b>   | <b>Rover: 705</b>    |
| Coordinates:     |                       |                      |
| Latitude:        | 64° 45' 28.83428" N   | 64° 51' 21.30388" N  |
| Longitude:       | 147° 13' 16.86415" W  | 147° 49' 08.66642" W |
| Ellip. Hgt:      | 550.31586 fts         | 553.84706 fts        |
| Solution type:   | Phase: all fix        |                      |
| GNSS type:       | GPS                   |                      |
| Frequency:       | IonoFree (L3)         |                      |
| Ambiguity:       | Yes                   |                      |
| <b>729 - 707</b> | <b>Reference: 729</b> | <b>Rover: 707</b>    |

|                  |                       |                      |
|------------------|-----------------------|----------------------|
| Coordinates:     |                       |                      |
| Latitude:        | 64° 47' 27.82470" N   | 64° 44' 00.61821" N  |
| Longitude:       | 147° 10' 54.06648" W  | 147° 21' 31.73346" W |
| Ellip. Hgt:      | 562.60888 fts         | 528.54123 fts        |
| Solution type:   | Phase: all fix        |                      |
| GNSS type:       | GPS                   |                      |
| Frequency:       | L1 and L2             |                      |
| Ambiguity:       | Yes                   |                      |
| <b>734 - 403</b> | <b>Reference: 734</b> | <b>Rover: 403</b>    |
| Coordinates:     |                       |                      |
| Latitude:        | 64° 41' 26.19580" N   | 64° 57' 09.00165" N  |
| Longitude:       | 147° 07' 27.06939" W  | 147° 37' 19.95436" W |
| Ellip. Hgt:      | 565.16518 fts         | 770.22126 fts        |
| Solution type:   | Phase: all fix        |                      |
| GNSS type:       | GPS                   |                      |
| Frequency:       | IonoFree (L3)         |                      |
| Ambiguity:       | Yes                   |                      |
| <b>551 - 729</b> | <b>Reference: 551</b> | <b>Rover: 729</b>    |
| Coordinates:     |                       |                      |
| Latitude:        | 64° 48' 50.38170" N   | 64° 47' 27.82453" N  |
| Longitude:       | 147° 51' 08.10888" W  | 147° 10' 54.06614" W |
| Ellip. Hgt:      | 462.53516 fts         | 562.53693 fts        |
| Solution type:   | Phase: all fix        |                      |
| GNSS type:       | GPS                   |                      |
| Frequency:       | IonoFree (L3)         |                      |
| Ambiguity:       | Yes                   |                      |
| <b>734 - 741</b> | <b>Reference: 734</b> | <b>Rover: 741</b>    |
| Coordinates:     |                       |                      |
| Latitude:        | 64° 41' 26.19580" N   | 64° 56' 55.55343" N  |
| Longitude:       | 147° 07' 27.06939" W  | 147° 38' 44.50489" W |
| Ellip. Hgt:      | 565.16518 fts         | 752.65338 fts        |
| Solution type:   | Phase: all fix        |                      |
| GNSS type:       | GPS                   |                      |
| Frequency:       | IonoFree (L3)         |                      |
| Ambiguity:       | Yes                   |                      |
| <b>551 - 402</b> | <b>Reference: 551</b> | <b>Rover: 402</b>    |
| Coordinates:     |                       |                      |
| Latitude:        | 64° 48' 50.38170" N   | 64° 43' 18.04960" N  |
| Longitude:       | 147° 51' 08.10888" W  | 147° 17' 04.41259" W |
| Ellip. Hgt:      | 462.53516 fts         | 546.13874 fts        |
| Solution type:   | Phase: all fix        |                      |
| GNSS type:       | GPS                   |                      |
| Frequency:       | IonoFree (L3)         |                      |
| Ambiguity:       | Yes                   |                      |
| <b>729 - 403</b> | <b>Reference: 729</b> | <b>Rover: 403</b>    |

|                  |                       |                      |
|------------------|-----------------------|----------------------|
| Coordinates:     |                       |                      |
| Latitude:        | 64° 47' 27.82470" N   | 64° 57' 09.00166" N  |
| Longitude:       | 147° 10' 54.06648" W  | 147° 37' 19.95414" W |
| Ellip. Hgt:      | 562.60888 fts         | 770.23983 fts        |
| Solution type:   | Phase: all fix        |                      |
| GNSS type:       | GPS                   |                      |
| Frequency:       | IonoFree (L3)         |                      |
| Ambiguity:       | Yes                   |                      |
| <b>551 - 708</b> | <b>Reference: 551</b> | <b>Rover: 708</b>    |
| Coordinates:     |                       |                      |
| Latitude:        | 64° 48' 50.38170" N   | 64° 43' 25.09156" N  |
| Longitude:       | 147° 51' 08.10888" W  | 147° 16' 22.58826" W |
| Ellip. Hgt:      | 462.53516 fts         | 557.23373 fts        |
| Solution type:   | Phase: all fix        |                      |
| GNSS type:       | GPS                   |                      |
| Frequency:       | IonoFree (L3)         |                      |
| Ambiguity:       | Yes                   |                      |
| <b>729 - 741</b> | <b>Reference: 729</b> | <b>Rover: 741</b>    |
| Coordinates:     |                       |                      |
| Latitude:        | 64° 47' 27.82470" N   | 64° 56' 55.55678" N  |
| Longitude:       | 147° 10' 54.06648" W  | 147° 38' 44.50487" W |
| Ellip. Hgt:      | 562.60888 fts         | 752.38590 fts        |
| Solution type:   | Phase: all fix        |                      |
| GNSS type:       | GPS                   |                      |
| Frequency:       | IonoFree (L3)         |                      |
| Ambiguity:       | Yes                   |                      |
| <b>403 - 402</b> | <b>Reference: 403</b> | <b>Rover: 402</b>    |
| Coordinates:     |                       |                      |
| Latitude:        | 64° 57' 09.00154" N   | 64° 43' 18.04972" N  |
| Longitude:       | 147° 37' 19.95389" W  | 147° 17' 04.41242" W |
| Ellip. Hgt:      | 770.15778 fts         | 546.16807 fts        |
| Solution type:   | Phase: all fix        |                      |
| GNSS type:       | GPS                   |                      |
| Frequency:       | IonoFree (L3)         |                      |
| Ambiguity:       | Yes                   |                      |
| <b>741 - 402</b> | <b>Reference: 741</b> | <b>Rover: 402</b>    |
| Coordinates:     |                       |                      |
| Latitude:        | 64° 56' 55.55670" N   | 64° 43' 18.04891" N  |
| Longitude:       | 147° 38' 44.50519" W  | 147° 17' 04.40565" W |
| Ellip. Hgt:      | 752.24443 fts         | 546.31489 fts        |
| Solution type:   | Phase: all fix        |                      |
| GNSS type:       | GPS                   |                      |
| Frequency:       | IonoFree (L3)         |                      |
| Ambiguity:       | Yes                   |                      |
| <b>708 - 403</b> | <b>Reference: 708</b> | <b>Rover: 403</b>    |

|              |                      |                      |
|--------------|----------------------|----------------------|
| Coordinates: |                      |                      |
| Latitude:    | 64° 43' 25.09186" N  | 64° 57' 09.00173" N  |
| Longitude:   | 147° 16' 22.58856" W | 147° 37' 19.95429" W |
| Ellip. Hgt:  | 557.27316 fts        | 770.19958 fts        |

|                |                |
|----------------|----------------|
| Solution type: | Phase: all fix |
| GNSS type:     | GPS            |
| Frequency:     | IonoFree (L3)  |
| Ambiguity:     | Yes            |

**708 - 741****Reference: 708****Rover: 741**

|              |                      |                      |
|--------------|----------------------|----------------------|
| Coordinates: |                      |                      |
| Latitude:    | 64° 43' 25.09186" N  | 64° 56' 55.55376" N  |
| Longitude:   | 147° 16' 22.58856" W | 147° 38' 44.50409" W |
| Ellip. Hgt:  | 557.27316 fts        | 752.59787 fts        |

|                |                |
|----------------|----------------|
| Solution type: | Phase: all fix |
| GNSS type:     | GPS            |
| Frequency:     | IonoFree (L3)  |
| Ambiguity:     | Yes            |

**1 - 706****Reference: 1****Rover: 706**

|              |                      |                      |
|--------------|----------------------|----------------------|
| Coordinates: |                      |                      |
| Latitude:    | 64° 45' 28.83428" N  | 64° 45' 02.34386" N  |
| Longitude:   | 147° 13' 16.86415" W | 147° 21' 12.46591" W |
| Ellip. Hgt:  | 550.31586 fts        | 525.63054 fts        |

|                |                |
|----------------|----------------|
| Solution type: | Phase: all fix |
| GNSS type:     | GPS            |
| Frequency:     | L1 and L2      |
| Ambiguity:     | Yes            |

**552 - 706****Reference: 552****Rover: 706**

|              |                      |                      |
|--------------|----------------------|----------------------|
| Coordinates: |                      |                      |
| Latitude:    | 64° 51' 48.48988" N  | 64° 45' 02.34351" N  |
| Longitude:   | 147° 38' 34.60197" W | 147° 21' 12.46562" W |
| Ellip. Hgt:  | 1131.51230 fts       | 525.62907 fts        |

|                |                |
|----------------|----------------|
| Solution type: | Phase: all fix |
| GNSS type:     | GPS            |
| Frequency:     | IonoFree (L3)  |
| Ambiguity:     | Yes            |

**729 - 706****Reference: 729****Rover: 706**

|              |                      |                      |
|--------------|----------------------|----------------------|
| Coordinates: |                      |                      |
| Latitude:    | 64° 47' 27.82470" N  | 64° 45' 02.34395" N  |
| Longitude:   | 147° 10' 54.06648" W | 147° 21' 12.46570" W |
| Ellip. Hgt:  | 562.60888 fts        | 525.63727 fts        |

|                |                |
|----------------|----------------|
| Solution type: | Phase: all fix |
| GNSS type:     | GPS            |
| Frequency:     | L1 and L2      |
| Ambiguity:     | Yes            |

**706 - 734****Reference: 706****Rover: 734**

|                  |                       |                      |
|------------------|-----------------------|----------------------|
| Coordinates:     |                       |                      |
| Latitude:        | 64° 45' 02.34371" N   | 64° 41' 26.19576" N  |
| Longitude:       | 147° 21' 12.46563" W  | 147° 07' 27.06867" W |
| Ellip. Hgt:      | 525.62739 fts         | 565.17203 fts        |
| Solution type:   | Phase: all fix        |                      |
| GNSS type:       | GPS                   |                      |
| Frequency:       | L1 and L2             |                      |
| Ambiguity:       | Yes                   |                      |
| <b>706 - 708</b> | <b>Reference: 706</b> | <b>Rover: 708</b>    |
| Coordinates:     |                       |                      |
| Latitude:        | 64° 45' 02.34371" N   | 64° 43' 25.09170" N  |
| Longitude:       | 147° 21' 12.46563" W  | 147° 16' 22.58808" W |
| Ellip. Hgt:      | 525.62739 fts         | 557.25095 fts        |
| Solution type:   | Phase: all fix        |                      |
| GNSS type:       | GPS                   |                      |
| Frequency:       | L1 and L2             |                      |
| Ambiguity:       | Yes                   |                      |
| <b>706 - 402</b> | <b>Reference: 706</b> | <b>Rover: 402</b>    |
| Coordinates:     |                       |                      |
| Latitude:        | 64° 45' 02.34371" N   | 64° 43' 18.04966" N  |
| Longitude:       | 147° 21' 12.46563" W  | 147° 17' 04.41410" W |
| Ellip. Hgt:      | 525.62739 fts         | 546.26777 fts        |
| Solution type:   | Phase: all fix        |                      |
| GNSS type:       | GPS                   |                      |
| Frequency:       | L1 and L2             |                      |
| Ambiguity:       | Yes                   |                      |
| <b>552 - 729</b> | <b>Reference: 552</b> | <b>Rover: 729</b>    |
| Coordinates:     |                       |                      |
| Latitude:        | 64° 51' 48.48988" N   | 64° 47' 27.82614" N  |
| Longitude:       | 147° 38' 34.60197" W  | 147° 10' 54.06843" W |
| Ellip. Hgt:      | 1131.51230 fts        | 562.40235 fts        |
| Solution type:   | Float                 |                      |
| GNSS type:       | GPS                   |                      |
| Frequency:       | IonoFree (L3)         |                      |
| Ambiguity:       | No                    |                      |
| <b>1 - 706</b>   | <b>Reference: 1</b>   | <b>Rover: 706</b>    |
| Coordinates:     |                       |                      |
| Latitude:        | 64° 45' 28.83428" N   | 64° 45' 02.34390" N  |
| Longitude:       | 147° 13' 16.86415" W  | 147° 21' 12.46571" W |
| Ellip. Hgt:      | 550.31586 fts         | 525.67559 fts        |
| Solution type:   | Phase: all fix        |                      |
| GNSS type:       | GPS                   |                      |
| Frequency:       | L1 and L2             |                      |
| Ambiguity:       | Yes                   |                      |
| <b>729 - 708</b> | <b>Reference: 729</b> | <b>Rover: 708</b>    |

|                  |                       |                      |
|------------------|-----------------------|----------------------|
| Coordinates:     |                       |                      |
| Latitude:        | 64° 47' 27.82470" N   | 64° 43' 25.09182" N  |
| Longitude:       | 147° 10' 54.06648" W  | 147° 16' 22.58808" W |
| Ellip. Hgt:      | 562.60888 fts         | 557.23261 fts        |
| Solution type:   | Phase: all fix        |                      |
| GNSS type:       | GPS                   |                      |
| Frequency:       | L1 and L2             |                      |
| Ambiguity:       | Yes                   |                      |
| <b>1 - 552</b>   | <b>Reference: 1</b>   | <b>Rover: 552</b>    |
| Coordinates:     |                       |                      |
| Latitude:        | 64° 45' 28.83428" N   | 64° 51' 48.48737" N  |
| Longitude:       | 147° 13' 16.86415" W  | 147° 38' 34.58958" W |
| Ellip. Hgt:      | 550.31586 fts         | 1131.65682 fts       |
| Solution type:   | Float                 |                      |
| GNSS type:       | GPS                   |                      |
| Frequency:       | IonoFree (L3)         |                      |
| Ambiguity:       | No                    |                      |
| <b>1 - 729</b>   | <b>Reference: 1</b>   | <b>Rover: 729</b>    |
| Coordinates:     |                       |                      |
| Latitude:        | 64° 45' 28.83428" N   | 64° 47' 27.82455" N  |
| Longitude:       | 147° 13' 16.86415" W  | 147° 10' 54.06729" W |
| Ellip. Hgt:      | 550.31586 fts         | 562.50931 fts        |
| Solution type:   | Phase: all fix        |                      |
| GNSS type:       | GPS                   |                      |
| Frequency:       | L1 and L2             |                      |
| Ambiguity:       | Yes                   |                      |
| <b>1 - 706</b>   | <b>Reference: 1</b>   | <b>Rover: 706</b>    |
| Coordinates:     |                       |                      |
| Latitude:        | 64° 45' 28.83428" N   | 64° 45' 02.34381" N  |
| Longitude:       | 147° 13' 16.86415" W  | 147° 21' 12.46560" W |
| Ellip. Hgt:      | 550.31586 fts         | 525.60800 fts        |
| Solution type:   | Phase: all fix        |                      |
| GNSS type:       | GPS                   |                      |
| Frequency:       | L1 and L2             |                      |
| Ambiguity:       | Yes                   |                      |
| <b>729 - 706</b> | <b>Reference: 729</b> | <b>Rover: 706</b>    |
| Coordinates:     |                       |                      |
| Latitude:        | 64° 47' 27.82470" N   | 64° 45' 02.34497" N  |
| Longitude:       | 147° 10' 54.06648" W  | 147° 21' 12.46741" W |
| Ellip. Hgt:      | 562.60888 fts         | 525.90863 fts        |
| Solution type:   | Phase: all fix        |                      |
| GNSS type:       | GPS                   |                      |
| Frequency:       | L1 and L2             |                      |
| Ambiguity:       | Yes                   |                      |

---

## Kinematic Overview

---



**551 - 401**

Receiver type / S/N:  
Antenna type / S/N:  
Antenna height:

**Reference: 551**

SR530 / 34670  
AT502 Tripod / -  
4.46521 fts

**Rover: 401**

GX1230GG / 458014  
AX1202 GG Pole / -

## Reference coordinates:

Latitude: 64° 48' 50.38170" N  
Longitude: 147° 51' 08.10888" W  
Ellip. Hgt: 462.53516 fts

Manually occupied points: 2

Time span: 04/21/2010 07:42:00 - 04/21/2010 15:44:40

Duration: 8h 02' 40"

## DOPs (min-max):

GDOP: 1.9 - 13.1

PDOP: 1.7 - 10.9

HDOP: 0.8 - 3.2

VDOP: 1.4 - 10.4

**Manually occupied points****401**

## Coordinates:

Latitude: 64° 49' 21.41283" N  
Longitude: 147° 49' 35.18769" W  
Ellip. Hgt: 465.26439 fts

Antenna height: 5.20668 fts

## Solution type:

Phase: all fix

## Frequency:

L1 and L2

## Ambiguity:

Yes

## Time span:

04/21/2010 07:42:00 - 04/21/2010 12:12:15

## Duration:

4h 30' 15"

**401**

## Coordinates:

Latitude: 64° 49' 21.41282" N  
Longitude: 147° 49' 35.18766" W  
Ellip. Hgt: 465.25534 fts

Antenna height: 5.20668 fts

## Solution type:

Phase: all fix

## Frequency:

L1 and L2

## Ambiguity:

Yes

## Time span:

04/21/2010 13:57:15 - 04/21/2010 15:44:40

## Duration:

1h 47' 25"

**704 - 401**

Receiver type / S/N:  
Antenna type / S/N:  
Antenna height:

**Reference: 704**

SR530 / 39986  
AT502 Tripod / -  
3.70078 fts

**Rover: 401**

GX1230GG / 458014  
AX1202 GG Pole / -

## Reference coordinates:

Latitude: 64° 47' 15.07646" N  
Longitude: 147° 58' 13.72322" W  
Ellip. Hgt: 579.37017 fts

Manually occupied points: 2

Time span: 04/21/2010 07:29:20 - 04/21/2010 15:31:00

Duration: 8h 01' 40"

DOPs (min-max): GDOP: 1.9 - 37.1  
PDOP: 1.7 - 29.5 HDOP: 0.8 - 14.9 VDOP: 1.5 - 25.4

**Manually occupied points****401**

Coordinates:  
Latitude: 64° 49' 21.41278" N  
Longitude: 147° 49' 35.18780" W  
Ellip. Hgt: 465.27000 fts

Antenna height: 5.20668 fts

Solution type: Phase: all fix  
Frequency: L1 and L2  
Ambiguity: Yes  
Time span: 04/21/2010 07:29:20 - 04/21/2010 12:12:15  
Duration: 4h 42' 55"

**401**

Coordinates:  
Latitude: 64° 49' 21.41277" N  
Longitude: 147° 49' 35.18771" W  
Ellip. Hgt: 465.25475 fts

Antenna height: 5.20668 fts

Solution type: Phase: all fix  
Frequency: L1 and L2  
Ambiguity: Yes  
Time span: 04/21/2010 13:57:15 - 04/21/2010 15:31:00  
Duration: 1h 33' 45"

**703 - 401**

Receiver type / S/N: SR530 / 132169  
Antenna type / S/N: AT502 Tripod / -  
Antenna height: 6.20734 fts

**Reference: 703****Rover: 401**

GX1230GG / 458014  
AX1202 GG Pole / -

## Reference coordinates:

Latitude: 64° 50' 58.46939" N  
Longitude: 147° 51' 52.60870" W  
Ellip. Hgt: 489.33931 fts

Manually occupied points: 2

Time span: 04/21/2010 07:59:10 - 04/21/2010 15:19:35  
Duration: 7h 20' 25"

DOPs (min-max): GDOP: 1.9 - 7.1  
PDOP: 1.7 - 5.9 HDOP: 0.8 - 2.5 VDOP: 1.4 - 5.3

**Manually occupied points****401**

Coordinates:  
 Latitude: 64° 49' 21.41283" N  
 Longitude: 147° 49' 35.18769" W  
 Ellip. Hgt: 465.25826 fts

Antenna height: 5.20668 fts

Solution type: Phase: all fix  
 Frequency: L1 and L2  
 Ambiguity: Yes  
 Time span: 04/21/2010 07:59:10 - 04/21/2010 12:12:15  
 Duration: 4h 13' 05"

**401**

Coordinates:  
 Latitude: 64° 49' 21.41282" N  
 Longitude: 147° 49' 35.18767" W  
 Ellip. Hgt: 465.25629 fts

Antenna height: 5.20668 fts

Solution type: Phase: all fix  
 Frequency: L1 and L2  
 Ambiguity: Yes  
 Time span: 04/21/2010 13:57:15 - 04/21/2010 15:19:35  
 Duration: 1h 22' 20"

**705 - 401**

Receiver type / S/N:  
 Antenna type / S/N:  
 Antenna height:

**Reference: 705**

SR530 / 32671  
 AT502 Tripod / -  
 2.75262 fts

**Rover: 401**

GX1230GG / 458014  
 AX1202 GG Pole / -

## Reference coordinates:

Latitude: 64° 51' 21.30425" N  
 Longitude: 147° 49' 08.66629" W  
 Ellip. Hgt: 553.86667 fts

Manually occupied points: 2

Time span: 04/21/2010 08:16:45 - 04/21/2010 15:10:05  
 Duration: 6h 53' 20"

DOPs (min-max): GDOP: 1.9 - 6.5  
 PDOP: 1.7 - 5.3 HDOP: 0.7 - 2.4 VDOP: 1.4 - 4.8

**Manually occupied points****401**

Coordinates:  
 Latitude: 64° 49' 21.41286" N  
 Longitude: 147° 49' 35.18772" W  
 Ellip. Hgt: 465.25064 fts

Antenna height: 5.20668 fts

Solution type: Phase: all fix  
 Frequency: L1 and L2  
 Ambiguity: Yes  
 Time span: 04/21/2010 08:16:45 - 04/21/2010 12:12:15  
 Duration: 3h 55' 30"

**401**

Coordinates:  
     Latitude: 64° 49' 21.41281" N  
     Longitude: 147° 49' 35.18765" W  
     Ellip. Hgt: 465.24694 fts

Antenna height: 5.20668 fts

Solution type: Phase: all fix  
 Frequency: L1 and L2  
 Ambiguity: Yes  
 Time span: 04/21/2010 13:57:15 - 04/21/2010 15:10:05  
 Duration: 1h 12' 50"

**552 - 401**

Receiver type / S/N: SR530 / 132135  
 Antenna type / S/N: AT502 Tripod / -  
 Antenna height: 4.06823 fts

**Reference: 552****Rover: 401**

GX1230GG / 458014  
 AX1202 GG Pole / -

Reference coordinates:  
     Latitude: 64° 51' 48.48988" N  
     Longitude: 147° 38' 34.60197" W  
     Ellip. Hgt: 1131.51230 fts

Manually occupied points: 2

Time span: 04/21/2010 09:10:15 - 04/21/2010 15:44:40  
 Duration: 6h 34' 25"

DOPs (min-max): GDOP: 1.9 - 277.9      HDOP: 0.8 - 229.8      VDOP: 1.4 - 132.2  
                          PDOP: 1.7 - 265.1

**Manually occupied points****401**

Coordinates:  
     Latitude: 64° 49' 21.41280" N  
     Longitude: 147° 49' 35.18786" W  
     Ellip. Hgt: 465.23903 fts

Antenna height: 5.20668 fts

Solution type: Phase: all fix  
 Frequency: L1 and L2  
 Ambiguity: Yes  
 Time span: 04/21/2010 09:10:15 - 04/21/2010 12:12:15  
 Duration: 3h 02' 00"

**401**

Coordinates:  
     Latitude: 64° 49' 21.41284" N

Longitude: 147° 49' 35.18780" W  
 Ellip. Hgt: 465.24576 fts  
 Antenna height: 5.20668 fts  
 Solution type: Phase: all fix  
 Frequency: L1 and L2  
 Ambiguity: Yes  
 Time span: 04/21/2010 13:57:15 - 04/21/2010 15:44:40  
 Duration: 1h 47' 25"

**701 - 401**

Receiver type / S/N: GX1230GG / 458092  
 Antenna type / S/N: AX1202 GG Tripod / -  
 Antenna height: 3.97309 fts

**Reference: 701**

Receiver type / S/N: GX1230GG / 458092  
 Antenna type / S/N: AX1202 GG Tripod / -  
 Antenna height: 3.97309 fts

**Rover: 401**

Receiver type / S/N: GX1230GG / 458014  
 Antenna type / S/N: AX1202 GG Pole / -

**Reference coordinates:**

Latitude: 64° 48' 40.88790" N  
 Longitude: 147° 34' 35.30800" W  
 Ellip. Hgt: 487.75821 fts

Manually occupied points: 2

Time span: 04/21/2010 09:42:50 - 04/21/2010 15:44:40  
 Duration: 6h 01' 50"

DOPs (min-max): GDOP: 1.8 - 83.1  
 PDOP: 1.7 - 67.7 HDOP: 0.8 - 25.9 VDOP: 0.0 - 62.6

**Manually occupied points****401**

Coordinates:  
 Latitude: 64° 49' 21.41338" N  
 Longitude: 147° 49' 35.18739" W  
 Ellip. Hgt: 465.37522 fts

Antenna height: 5.20668 fts

Solution type: Float  
 Frequency: L1 and L2  
 Ambiguity: No  
 Time span: 04/21/2010 09:42:50 - 04/21/2010 12:12:15  
 Duration: 2h 29' 25"

**401**

Coordinates:  
 Latitude: 64° 49' 21.41297" N  
 Longitude: 147° 49' 35.18653" W  
 Ellip. Hgt: 465.18519 fts

Antenna height: 5.20668 fts

Solution type: Float  
 Frequency: L1 and L2  
 Ambiguity: No  
 Time span: 04/21/2010 13:57:15 - 04/21/2010 15:44:40

Duration: 1h 47' 25"

#### 1 - 402

Receiver type / S/N:

Antenna type / S/N:

Antenna height:

#### Reference: 1

SR530 / 39982

AT502 Tripod / -

1.56168 fts

#### Rover: 402

GX1230GG / 458014

AX1202 GG Pole / -

Reference coordinates:

Latitude: 64° 45' 28.83428" N

Longitude: 147° 13' 16.86415" W

Ellip. Hgt: 550.31586 fts

Manually occupied points: 2

Time span: 04/22/2010 12:58:50 - 04/22/2010 18:46:05

Duration: 5h 47' 15"

DOPs (min-max):

GDOP: 1.7 - 6.0

PDOP: 1.5 - 5.1

HDOP: 0.7 - 1.7

VDOP: 1.3 - 4.9

#### Manually occupied points

##### 402

Coordinates:

Latitude: 64° 43' 18.04975" N

Longitude: 147° 17' 04.41269" W

Ellip. Hgt: 546.29189 fts

Antenna height: 6.56167 fts

Solution type: Phase: all fix

Frequency: L1 and L2

Ambiguity: Yes

Time span: 04/22/2010 12:58:50 - 04/22/2010 14:23:00

Duration: 1h 24' 10"

##### 402

Coordinates:

Latitude: 64° 43' 18.04977" N

Longitude: 147° 17' 04.41375" W

Ellip. Hgt: 546.29815 fts

Antenna height: 6.56167 fts

Solution type: Phase: all fix

Frequency: L1 and L2

Ambiguity: Yes

Time span: 04/22/2010 16:57:35 - 04/22/2010 18:46:05

Duration: 1h 48' 30"

#### 552 - 402

Receiver type / S/N:

Antenna type / S/N:

Antenna height:

#### Reference: 552

SR530 / 132135

AT502 Tripod / -

4.06823 fts

#### Rover: 402

GX1230GG / 458014

AX1202 GG Pole / -

Reference coordinates:

Latitude: 64° 51' 48.48988" N

Longitude: 147° 38' 34.60197" W  
 Ellip. Hgt: 1131.51230 fts  
 Manually occupied points: 2  
 Time span: 04/22/2010 12:58:50 - 04/22/2010 18:46:05  
 Duration: 5h 47' 15"  
 DOPs (min-max): GDOP: 2.2 - 10.7  
 PDOP: 1.9 - 8.2 HDOP: 0.8 - 6.3 VDOP: 1.6 - 6.8

### Manually occupied points 402

Coordinates:  
 Latitude: 64° 43' 18.04965" N  
 Longitude: 147° 17' 04.41271" W  
 Ellip. Hgt: 546.17210 fts  
 Antenna height: 6.56167 fts  
 Solution type: Phase: all fix  
 Frequency: IonoFree (L3)  
 Ambiguity: Yes  
 Time span: 04/22/2010 12:58:50 - 04/22/2010 14:23:00  
 Duration: 1h 24' 10"

### 402

Coordinates:  
 Latitude: 64° 43' 18.04985" N  
 Longitude: 147° 17' 04.41300" W  
 Ellip. Hgt: 546.22883 fts  
 Antenna height: 6.56167 fts  
 Solution type: Phase: all fix  
 Frequency: IonoFree (L3)  
 Ambiguity: Yes  
 Time span: 04/22/2010 16:57:35 - 04/22/2010 18:46:05  
 Duration: 1h 48' 30"

### 729 - 402

Receiver type / S/N: GX1230GG / 458087  
 Antenna type / S/N: AX1202 GG Tripod / -  
 Antenna height: 4.61613 fts

### Reference: 729

### Rover: 402

GX1230GG / 458014  
 AX1202 GG Pole / -

### Reference coordinates:

Latitude: 64° 47' 27.82470" N  
 Longitude: 147° 10' 54.06648" W  
 Ellip. Hgt: 562.60888 fts

Manually occupied points: 2  
 Time span: 04/22/2010 12:58:50 - 04/22/2010 18:46:05  
 Duration: 5h 47' 15"  
 DOPs (min-max): GDOP: 1.7 - 6.0

PDOP: 1.5 - 5.1

HDOP: 0.7 - 2.3

VDOP: 1.3 - 4.9

**Manually occupied points****402**

Coordinates:

Latitude: 64° 43' 18.04981" N  
 Longitude: 147° 17' 04.41269" W  
 Ellip. Hgt: 546.28198 fts

Antenna height: 6.56167 fts

Solution type: Phase: all fix

Frequency: L1 and L2

Ambiguity: Yes

Time span: 04/22/2010 12:58:50 - 04/22/2010 14:23:00

Duration: 1h 24' 10"

**402**

Coordinates:

Latitude: 64° 43' 18.04985" N  
 Longitude: 147° 17' 04.41364" W  
 Ellip. Hgt: 546.27036 fts

Antenna height: 6.56167 fts

Solution type: Phase: all fix

Frequency: L1 and L2

Ambiguity: Yes

Time span: 04/22/2010 16:57:35 - 04/22/2010 18:46:05

Duration: 1h 48' 30"

**702 - 401**

Receiver type / S/N:

Antenna type / S/N:

Antenna height:

**Reference: 702**

GX1230GG / 458087

AX1202 GG Tripod / -

4.51443 fts

**Rover: 401**

GX1230GG / 458014

AX1202 GG Pole / -

Reference coordinates:

Latitude: 64° 47' 49.58460" N  
 Longitude: 147° 40' 09.75184" W  
 Ellip. Hgt: 490.10450 fts

Manually occupied points: 2

Time span: 04/21/2010 10:07:00 - 04/21/2010 15:44:40

Duration: 5h 37' 40"

DOPs (min-max):

GDOP: 1.7 - 6.5

PDOP: 1.5 - 5.3

HDOP: 0.8 - 2.4

VDOP: 1.3 - 4.8

**Manually occupied points****401**

Coordinates:

Latitude: 64° 49' 21.41285" N  
 Longitude: 147° 49' 35.18773" W  
 Ellip. Hgt: 465.26698 fts



Antenna height: 5.20668 fts

Solution type: Phase: all fix  
 Frequency: L1 and L2  
 Ambiguity: Yes  
 Time span: 04/21/2010 10:07:00 - 04/21/2010 12:12:15  
 Duration: 2h 05' 15"

**401**

Coordinates:  
 Latitude: 64° 49' 21.41287" N  
 Longitude: 147° 49' 35.18773" W  
 Ellip. Hgt: 465.26203 fts

Antenna height: 5.20668 fts

Solution type: Phase: all fix  
 Frequency: L1 and L2  
 Ambiguity: Yes  
 Time span: 04/21/2010 13:57:15 - 04/21/2010 15:44:40  
 Duration: 1h 47' 25"

**708 - 402**

Receiver type / S/N:  
 Antenna type / S/N:  
 Antenna height:

**Reference: 708**

SR530 / 32671  
 AT502 Tripod / -  
 4.22899 fts

**Rover: 402**

GX1230GG / 458014  
 AX1202 GG Pole / -

Reference coordinates:  
 Latitude: 64° 43' 25.09186" N  
 Longitude: 147° 16' 22.58856" W  
 Ellip. Hgt: 557.27316 fts

Manually occupied points: 2

Time span: 04/22/2010 13:09:25 - 04/22/2010 18:46:05  
 Duration: 5h 36' 40"

DOPs (min-max): GDOP: 1.7 - 6.0  
 PDOP: 1.5 - 5.1 HDOP: 0.7 - 1.7 VDOP: 1.3 - 4.9

**Manually occupied points****402**

Coordinates:  
 Latitude: 64° 43' 18.04988" N  
 Longitude: 147° 17' 04.41284" W  
 Ellip. Hgt: 546.33592 fts

Antenna height: 6.56167 fts

Solution type: Phase: all fix  
 Frequency: L1 and L2  
 Ambiguity: Yes  
 Time span: 04/22/2010 13:09:25 - 04/22/2010 14:23:00  
 Duration: 1h 13' 35"

**402**

Coordinates:  
     Latitude: 64° 43' 18.04985" N  
     Longitude: 147° 17' 04.41389" W  
     Ellip. Hgt: 546.32732 fts  
  
 Antenna height: 6.56167 fts  
  
 Solution type: Phase: all fix  
 Frequency: L1 and L2  
 Ambiguity: Yes  
 Time span: 04/22/2010 16:57:35 - 04/22/2010 18:46:05  
 Duration: 1h 48' 30"

**734 - 402**

Receiver type / S/N:  
 Antenna type / S/N:  
 Antenna height:

**Reference: 734**

SR530 / 39986  
 AT502 Tripod / -  
 4.54067 fts

**Rover: 402**

GX1230GG / 458014  
 AX1202 GG Pole / -

## Reference coordinates:

    Latitude: 64° 41' 26.19580" N  
     Longitude: 147° 07' 27.06939" W  
     Ellip. Hgt: 565.16518 fts

Manually occupied points: 2

Time span: 04/22/2010 12:58:50 - 04/22/2010 18:17:40  
 Duration: 5h 18' 50"

DOPs (min-max):  
     GDOP: 2.1 - 6.4  
     PDOP: 1.9 - 5.4                      HDOP: 1.0 - 1.7                      VDOP: 1.6 - 5.2

**Manually occupied points****402**

Coordinates:  
     Latitude: 64° 43' 18.04972" N  
     Longitude: 147° 17' 04.41274" W  
     Ellip. Hgt: 546.28368 fts

Antenna height: 6.56167 fts

Solution type: Phase: all fix  
 Frequency: L1 and L2  
 Ambiguity: Yes  
 Time span: 04/22/2010 12:58:50 - 04/22/2010 14:23:00  
 Duration: 1h 24' 10"

**402**

Coordinates:  
     Latitude: 64° 43' 18.04976" N  
     Longitude: 147° 17' 04.41370" W  
     Ellip. Hgt: 546.29743 fts

Antenna height: 6.56167 fts

Solution type: Phase: all fix  
 Frequency: L1 and L2

Ambiguity: Yes  
 Time span: 04/22/2010 16:57:35 - 04/22/2010 18:17:40  
 Duration: 1h 20' 05"

**709 - 401**

Receiver type / S/N:  
 Antenna type / S/N:  
 Antenna height:

**Reference: 709**

SR530 / 34753  
 AT502 Tripod / -  
 4.88844 fts

**Rover: 401**

GX1230GG / 458014  
 AX1202 GG Pole / -

## Reference coordinates:

Latitude: 64° 53' 32.88242" N  
 Longitude: 147° 25' 03.24303" W  
 Ellip. Hgt: 641.05994 fts

Manually occupied points: 2

Time span: 04/21/2010 10:45:50 - 04/21/2010 15:44:40  
 Duration: 4h 58' 50"

DOPs (min-max): GDOP: 1.9 - 7.1  
 PDOP: 1.7 - 5.8 HDOP: 0.8 - 2.5 VDOP: 1.4 - 5.3

**Manually occupied points****401**

## Coordinates:

Latitude: 64° 49' 21.41286" N  
 Longitude: 147° 49' 35.18788" W  
 Ellip. Hgt: 465.18778 fts

Antenna height: 5.20668 fts

Solution type: Phase: all fix  
 Frequency: IonoFree (L3)  
 Ambiguity: Yes  
 Time span: 04/21/2010 10:45:50 - 04/21/2010 12:12:15  
 Duration: 1h 26' 25"

**401**

## Coordinates:

Latitude: 64° 49' 21.41309" N  
 Longitude: 147° 49' 35.18766" W  
 Ellip. Hgt: 465.22578 fts

Antenna height: 5.20668 fts

Solution type: Phase: all fix  
 Frequency: IonoFree (L3)  
 Ambiguity: Yes  
 Time span: 04/21/2010 13:57:15 - 04/21/2010 15:44:40  
 Duration: 1h 47' 25"

**1 - 401**

Receiver type / S/N:  
 Antenna type / S/N:  
 Antenna height:

**Reference: 1**

SR530 / 39982  
 AT502 Tripod / -  
 1.56168 fts

**Rover: 401**

GX1230GG / 458014  
 AX1202 GG Pole / -

## Reference coordinates:

Latitude: 64° 45' 28.83428" N  
 Longitude: 147° 13' 16.86415" W  
 Ellip. Hgt: 550.31586 fts

Manually occupied points: 2

Time span: 04/21/2010 11:22:25 - 04/21/2010 15:44:40

Duration: 4h 22' 15"

DOPs (min-max): GDOP: 1.7 - 4.4  
 PDOP: 1.5 - 3.8 HDOP: 0.8 - 2.3 VDOP: 1.3 - 3.5

**Manually occupied points****401**

## Coordinates:

Latitude: 64° 49' 21.41264" N  
 Longitude: 147° 49' 35.18722" W  
 Ellip. Hgt: 465.23024 fts

Antenna height: 5.20668 fts

Solution type: Phase: all fix

Frequency: IonoFree (L3)

Ambiguity: Yes

Time span: 04/21/2010 11:22:25 - 04/21/2010 12:12:15

Duration: 49' 50"

**401**

## Coordinates:

Latitude: 64° 49' 21.41278" N  
 Longitude: 147° 49' 35.18750" W  
 Ellip. Hgt: 465.22394 fts

Antenna height: 5.20668 fts

Solution type: Phase: all fix

Frequency: IonoFree (L3)

Ambiguity: Yes

Time span: 04/21/2010 13:57:15 - 04/21/2010 15:44:40

Duration: 1h 47' 25"

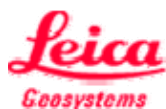

## Network Adjustment

www.MOVE3.com

(c) 1993-2006 Grontmij

Licensed to Leica Geosystems AG

Created: 04/25/2010 22:50:26

---

### Project Information

---

|                         |                                        |
|-------------------------|----------------------------------------|
| Project name:           | 1127.60548.01 FNSB LiDAR Mapping STS01 |
| Date created:           | 04/22/2010 00:21:31                    |
| Time zone:              | -8h 00'                                |
| Coordinate system name: | AK Zone 3 NAD83 Geoid09                |
| Application software:   | LEICA Geo Office 5.0                   |
| Processing kernel:      | MOVE3 3.4                              |

---

### General Information

---

#### Adjustment

|                    |             |
|--------------------|-------------|
| Type:              | Constrained |
| Dimension:         | 3D          |
| Coordinate system: | WGS 1984    |
| Height mode:       | Ellipsoidal |

|                                             |             |                      |
|---------------------------------------------|-------------|----------------------|
| Number of iterations:                       | 1           |                      |
| Maximum coord correction in last iteration: | 0.00000 fts | ✓ (tolerance is met) |

#### Stations

|                                    |    |
|------------------------------------|----|
| Number of (partly) known stations: | 6  |
| Number of unknown stations:        | 12 |
| Total:                             | 18 |

#### Observations

|                             |                     |
|-----------------------------|---------------------|
| GPS coordinate differences: | 342 (114 baselines) |
| Known coordinates:          | 16                  |
| Total:                      | 358                 |

#### Unknowns

|                     |     |
|---------------------|-----|
| Coordinates:        | 54  |
| Total:              | 54  |
| Degrees of freedom: | 304 |

#### Testing

|                           |        |
|---------------------------|--------|
| Alfa (multi dimensional): | 0.6497 |
| Alfa 0 (one dimensional): | 1.0 %  |
| Beta:                     | 80.0 % |
| Sigma a-priori (GPS):     | 10.0   |

|                                        |      |              |
|----------------------------------------|------|--------------|
| Critical value W-test:                 | 2.58 |              |
| Critical value T-test (2-dimensional): | 3.81 |              |
| Critical value T-test (3-dimensional): | 2.83 |              |
| Critical value F-test:                 | 0.97 |              |
| F-test:                                | 0.08 | ✓ (accepted) |

Results based on a-posteriori variance factor

## Adjustment Results

### Coordinates

| Station | Coordinate | Corr                 | Sd           |             |
|---------|------------|----------------------|--------------|-------------|
| 1       | Latitude   | 64° 45' 28.83429" N  | 0.00085 fts  | 0.00292 fts |
|         | Longitude  | 147° 13' 16.86361" W | 0.02347 fts  | 0.00285 fts |
|         | Height     | 550.27764 fts        | -0.03822 fts | 0.00344 fts |
| 401     | Latitude   | 64° 49' 21.41285" N  | 0.00240 fts  | 0.00351 fts |
|         | Longitude  | 147° 49' 35.18763" W | 0.00320 fts  | 0.00338 fts |
|         | Height     | 465.23519 fts        | -0.02146 fts | 0.00387 fts |
| 402     | Latitude   | 64° 43' 18.04977" N  | -0.00352 fts | 0.00551 fts |
|         | Longitude  | 147° 17' 04.41267" W | 0.02255 fts  | 0.00538 fts |
|         | Height     | 546.24221 fts        | -0.05676 fts | 0.00597 fts |
| 403     | Latitude   | 64° 57' 09.00166" N  | 0.01131 fts  | 0.00856 fts |
|         | Longitude  | 147° 37' 19.95371" W | 0.00760 fts  | 0.00846 fts |
|         | Height     | 770.18662 fts        | 0.02884 fts  | 0.00886 fts |
| 551     | Latitude   | 64° 48' 50.38170" N  | 0.00000 fts  | - fixed     |
|         | Longitude  | 147° 51' 08.10888" W | 0.00000 fts  | - fixed     |
|         | Height     | 462.53516 fts        | 0.00000 fts  | - fixed     |
| 552     | Latitude   | 64° 51' 48.48997" N  | 0.00000 fts  | - fixed     |
|         | Longitude  | 147° 38' 34.60171" W | 0.00000 fts  | - fixed     |
|         | Height     | 1131.46995 fts       | 0.00000 fts  | - fixed     |
| 701     | Latitude   | 64° 48' 40.88746" N  | -0.04432 fts | 0.01086 fts |
|         | Longitude  | 147° 34' 35.30746" W | 0.02366 fts  | 0.01076 fts |
|         | Height     | 487.74712 fts        | -0.01109 fts | 0.01155 fts |
| 702     | Latitude   | 64° 47' 49.58474" N  | 0.00000 fts  | - fixed     |
|         | Longitude  | 147° 40' 09.75174" W | 0.00000 fts  | - fixed     |
|         | Height     | 490.06605 fts        | 0.00000 fts  | - fixed     |
| 703     | Latitude   | 64° 50' 58.46942" N  | 0.00273 fts  | 0.00449 fts |
|         | Longitude  | 147° 51' 52.60865" W | 0.00229 fts  | 0.00433 fts |
|         | Height     | 489.31739 fts        | -0.02195 fts | 0.00489 fts |
| 704     | Latitude   | 64° 47' 15.07651" N  | 0.00554 fts  | 0.00561 fts |
|         | Longitude  | 147° 58' 13.72314" W | 0.00346 fts  | 0.00551 fts |
|         | Height     | 579.34773 fts        | -0.02241 fts | 0.00594 fts |
| 705     | Latitude   | 64° 51' 21.30427" N  | 0.00220 fts  | 0.00449 fts |
|         | Longitude  | 147° 49' 08.66623" W | 0.00264 fts  | 0.00436 fts |
|         | Height     | 553.84564 fts        | -0.02103 fts | 0.00489 fts |
| 706     | Latitude   | 64° 45' 02.34370" N  | 0.00000 fts  | - fixed     |
|         | Longitude  | 147° 21' 12.46525" W | 0.00000 fts  | - fixed     |
|         | Height     | 525.58356 fts        | 0.12585 fts  | 0.00492 fts |
| 707     | Latitude   | 64° 44' 00.61851" N  | 0.00000 fts  | - fixed     |
|         | Longitude  | 147° 21' 31.73227" W | 0.00000 fts  | - fixed     |
|         | Height     | 528.52381 fts        | 0.24961 fts  | 0.00620 fts |

|     |           |                      |              |             |       |
|-----|-----------|----------------------|--------------|-------------|-------|
| 708 | Latitude  | 64° 43' 25.09175" N  | 0.00000 fts  | -           | fixed |
|     | Longitude | 147° 16' 22.58812" W | 0.00000 fts  | -           | fixed |
|     | Height    | 557.22087 fts        | 0.00000 fts  | -           | fixed |
| 709 | Latitude  | 64° 53' 32.88237" N  | -0.00548 fts | 0.00623 fts |       |
|     | Longitude | 147° 25' 03.24278" W | 0.01090 fts  | 0.00617 fts |       |
|     | Height    | 641.03271 fts        | -0.02723 fts | 0.00646 fts |       |
| 729 | Latitude  | 64° 47' 27.82469" N  | -0.00136 fts | 0.00328 fts |       |
|     | Longitude | 147° 10' 54.06599" W | 0.02103 fts  | 0.00322 fts |       |
|     | Height    | 562.57256 fts        | -0.03632 fts | 0.00371 fts |       |
| 734 | Latitude  | 64° 41' 26.19579" N  | -0.00148 fts | 0.00610 fts |       |
|     | Longitude | 147° 07' 27.06885" W | 0.02346 fts  | 0.00597 fts |       |
|     | Height    | 565.12400 fts        | -0.04117 fts | 0.00653 fts |       |
| 741 | Latitude  | 64° 56' 55.55680" N  | 0.01073 fts  | 0.01010 fts |       |
|     | Longitude | 147° 38' 44.50502" W | 0.00741 fts  | 0.00988 fts |       |
|     | Height    | 752.27103 fts        | 0.02657 fts  | 0.01073 fts |       |

### Observations and Residuals

|           | Station | Target | Adj obs          | Resid        | Resid (ENH) Sd |             |
|-----------|---------|--------|------------------|--------------|----------------|-------------|
| <b>DX</b> | 729     | 707    | -30962.94582 fts | -0.03002 fts | -0.02753 fts   | 0.00420 fts |
| <b>DY</b> |         |        | 12979.05403 fts  | 0.01342 fts  | -0.02815 fts   | 0.00387 fts |
| <b>DZ</b> |         |        | -9007.55508 fts  | -0.02799 fts | -0.01765 fts   | 0.00630 fts |
| <b>DX</b> | 709     | 708    | -34854.53390 fts | 0.01837 fts  | 0.01821 fts    | 0.00640 fts |
| <b>DY</b> |         |        | -49115.66348 fts | -0.00988 fts | 0.01726 fts    | 0.00636 fts |
| <b>DZ</b> |         |        | -26362.61978 fts | 0.01893 fts  | 0.01283 fts    | 0.00669 fts |
| <b>DX</b> | 709     | 707    | -39346.99864 fts | -0.00791 fts | -0.02339 fts   | 0.00669 fts |
| <b>DY</b> |         |        | -36046.07473 fts | 0.02270 fts  | 0.00400 fts    | 0.00653 fts |
| <b>DZ</b> |         |        | -24847.54328 fts | -0.00240 fts | -0.00453 fts   | 0.00810 fts |
| <b>DX</b> | 1       | 707    | -18419.94239 fts | -0.03458 fts | -0.02615 fts   | 0.00390 fts |
| <b>DY</b> |         |        | 13696.65164 fts  | 0.00883 fts  | -0.02615 fts   | 0.00358 fts |
| <b>DZ</b> |         |        | -3843.76180 fts  | -0.00978 fts | 0.00151 fts    | 0.00610 fts |
| <b>DX</b> | 1       | 702    | -26698.02029 fts | -0.00341 fts | -0.00036 fts   | 0.00335 fts |
| <b>DY</b> |         |        | 65910.27595 fts  | -0.00177 fts | -0.03189 fts   | 0.00328 fts |
| <b>DZ</b> |         |        | 6039.78989 fts   | -0.06663 fts | -0.05863 fts   | 0.00387 fts |
| <b>DX</b> | 701     | 707    | -3462.45872 fts  | -0.02736 fts | -0.01693 fts   | 0.01093 fts |
| <b>DY</b> |         |        | -42507.37112 fts | 0.00269 fts  | -0.02231 fts   | 0.01083 fts |
| <b>DZ</b> |         |        | -12100.58246 fts | -0.00633 fts | 0.00348 fts    | 0.01178 fts |
| <b>DX</b> | 552     | 707    | -12255.55531 fts | -0.00741 fts | -0.02415 fts   | 0.00308 fts |
| <b>DY</b> |         |        | -60343.54621 fts | 0.02388 fts  | 0.00709 fts    | 0.00259 fts |
| <b>DZ</b> |         |        | -20788.26036 fts | 0.00285 fts  | -0.00020 fts   | 0.00591 fts |
| <b>DX</b> | 552     | 706    | -7027.21541 fts  | -0.01355 fts | -0.00499 fts   | 0.00269 fts |
| <b>DY</b> |         |        | -57987.48442 fts | -0.00269 fts | -0.01191 fts   | 0.00233 fts |
| <b>DZ</b> |         |        | -18114.81666 fts | -0.00056 fts | 0.00499 fts    | 0.00482 fts |
| <b>DX</b> | 702     | 708    | 12770.54263 fts  | 0.00676 fts  | 0.02267 fts    | 0.00200 fts |
| <b>DY</b> |         |        | -65283.21307 fts | -0.02254 fts | 0.02054 fts    | 0.00197 fts |
| <b>DZ</b> |         |        | -11398.62819 fts | 0.06171 fts  | 0.05853 fts    | 0.00210 fts |
| <b>DX</b> | 702     | 707    | 8278.07790 fts   | -0.01250 fts | -0.01791 fts   | 0.00308 fts |
| <b>DY</b> |         |        | -52213.62435 fts | 0.01329 fts  | 0.01555 fts    | 0.00262 fts |
| <b>DZ</b> |         |        | -9883.55169 fts  | 0.04386 fts  | 0.04117 fts    | 0.00591 fts |
| <b>DX</b> | 702     | 552    | 20533.63324 fts  | -0.00095 fts | -0.00551 fts   | 0.00187 fts |
| <b>DY</b> |         |        | 8129.92186 fts   | 0.00591 fts  | 0.00443 fts    | 0.00184 fts |
| <b>DZ</b> |         |        | 10904.70870 fts  | 0.00538 fts  | 0.00387 fts    | 0.00194 fts |
| <b>DX</b> | 708     | 707    | -4492.46474 fts  | -0.02913 fts | -0.01617 fts   | 0.00305 fts |
| <b>DY</b> |         |        | 13069.58876 fts  | 0.00049 fts  | -0.02982 fts   | 0.00259 fts |

|    |     |     |                  |              |              |             |
|----|-----|-----|------------------|--------------|--------------|-------------|
| DZ |     |     | 1515.07650 fts   | -0.01850 fts | -0.00636 fts | 0.00577 fts |
| DX | 551 | 707 | 18749.50555 fts  | -0.01732 fts | -0.03927 fts | 0.00518 fts |
| DY |     |     | -79317.19950 fts | 0.03550 fts  | -0.00689 fts | 0.00492 fts |
| DZ |     |     | -12488.29582 fts | -0.02520 fts | -0.02461 fts | 0.00725 fts |
| DX | 551 | 702 | 10471.42765 fts  | -0.00135 fts | 0.00240 fts  | 0.00453 fts |
| DY |     |     | -27103.57519 fts | -0.00367 fts | -0.00154 fts | 0.00449 fts |
| DZ |     |     | -2604.74417 fts  | 0.00299 fts  | 0.00404 fts  | 0.00495 fts |
| DX | 729 | 741 | 5069.22342 fts   | -0.02313 fts | 0.02490 fts  | 0.01033 fts |
| DY |     |     | 88891.72671 fts  | -0.04455 fts | -0.00617 fts | 0.01020 fts |
| DZ |     |     | 24669.90283 fts  | 0.07812 fts  | 0.08924 fts  | 0.01132 fts |
| DX | 729 | 734 | -23044.97235 fts | -0.00164 fts | -0.00364 fts | 0.00620 fts |
| DY |     |     | -25574.12533 fts | 0.00325 fts  | 0.00194 fts  | 0.00617 fts |
| DZ |     |     | -15676.87928 fts | 0.00374 fts  | 0.00325 fts  | 0.00669 fts |
| DX | 729 | 709 | 8384.05282 fts   | -0.01079 fts | -0.00879 fts | 0.00682 fts |
| DY |     |     | 49025.12875 fts  | 0.00351 fts  | -0.03310 fts | 0.00679 fts |
| DZ |     |     | 15839.98820 fts  | -0.06250 fts | -0.05348 fts | 0.00719 fts |
| DX | 729 | 403 | 8057.82686 fts   | -0.01056 fts | 0.00079 fts  | 0.00892 fts |
| DY |     |     | 86474.04795 fts  | -0.00774 fts | -0.00279 fts | 0.00889 fts |
| DZ |     |     | 25264.55987 fts  | 0.02123 fts  | 0.02477 fts  | 0.00938 fts |
| DX | 709 | 705 | -43629.42478 fts | -0.00607 fts | 0.00026 fts  | 0.00735 fts |
| DY |     |     | 46265.19261 fts  | -0.00420 fts | -0.01722 fts | 0.00728 fts |
| DZ |     |     | -5755.74597 fts  | -0.02480 fts | -0.01932 fts | 0.00781 fts |
| DX | 709 | 703 | -49156.58194 fts | -0.00138 fts | 0.00203 fts  | 0.00738 fts |
| DY |     |     | 51161.90128 fts  | -0.00331 fts | -0.00676 fts | 0.00732 fts |
| DZ |     |     | -6800.12482 fts  | -0.00968 fts | -0.00751 fts | 0.00784 fts |
| DX | 734 | 403 | 31102.79921 fts  | -0.00627 fts | -0.00597 fts | 0.01017 fts |
| DY |     |     | 112048.17328 fts | 0.00305 fts  | -0.00341 fts | 0.01010 fts |
| DZ |     |     | 40941.43915 fts  | -0.00036 fts | 0.00121 fts  | 0.01073 fts |
| DX | 1   | 734 | -10501.96892 fts | -0.00259 fts | -0.00151 fts | 0.00604 fts |
| DY |     |     | -24856.52771 fts | 0.00013 fts  | 0.00098 fts  | 0.00600 fts |
| DZ |     |     | -10513.08599 fts | 0.00676 fts  | 0.00699 fts  | 0.00653 fts |
| DX | 1   | 709 | 20927.05624 fts  | -0.01998 fts | -0.00190 fts | 0.00669 fts |
| DY |     |     | 49742.72637 fts  | -0.01060 fts | -0.02684 fts | 0.00666 fts |
| DZ |     |     | 21003.78148 fts  | -0.01516 fts | -0.00410 fts | 0.00705 fts |
| DX | 1   | 705 | -22702.36854 fts | -0.01942 fts | 0.01207 fts  | 0.00568 fts |
| DY |     |     | 96007.91894 fts  | -0.02687 fts | -0.04416 fts | 0.00561 fts |
| DZ |     |     | 15248.03551 fts  | -0.03809 fts | -0.02126 fts | 0.00630 fts |
| DX | 1   | 703 | -28229.52566 fts | -0.01066 fts | 0.01293 fts  | 0.00571 fts |
| DY |     |     | 100904.62765 fts | -0.02224 fts | -0.02710 fts | 0.00564 fts |
| DZ |     |     | 14203.65666 fts  | -0.01896 fts | -0.00820 fts | 0.00636 fts |
| DX | 1   | 403 | 20600.83029 fts  | 0.01732 fts  | 0.01611 fts  | 0.00886 fts |
| DY |     |     | 87191.64553 fts  | -0.00801 fts | -0.01411 fts | 0.00883 fts |
| DZ |     |     | 30428.35315 fts  | -0.05476 fts | -0.05387 fts | 0.00935 fts |
| DX | 701 | 709 | 35884.53991 fts  | 0.02119 fts  | 0.00584 fts  | 0.01109 fts |
| DY |     |     | -6461.29639 fts  | 0.00653 fts  | 0.00974 fts  | 0.01102 fts |
| DZ |     |     | 12746.96082 fts  | -0.02254 fts | -0.02949 fts | 0.01171 fts |
| DX | 706 | 734 | 2689.63356 fts   | 0.00725 fts  | 0.02343 fts  | 0.00630 fts |
| DY |     |     | -40909.24115 fts | -0.02316 fts | -0.00453 fts | 0.00617 fts |
| DZ |     |     | -9342.76790 fts  | 0.00292 fts  | 0.00538 fts  | 0.00732 fts |
| DX | 704 | 705 | 31726.06109 fts  | 0.00476 fts  | -0.00059 fts | 0.00627 fts |
| DY |     |     | -7943.49838 fts  | 0.00371 fts  | 0.00472 fts  | 0.00617 fts |
| DZ |     |     | 10620.81488 fts  | -0.00164 fts | -0.00404 fts | 0.00689 fts |
| DX | 704 | 703 | 26198.90393 fts  | 0.00344 fts  | 0.00066 fts  | 0.00617 fts |
| DY |     |     | -3046.78971 fts  | 0.00138 fts  | 0.00276 fts  | 0.00610 fts |



|    |     |     |                   |              |              |             |
|----|-----|-----|-------------------|--------------|--------------|-------------|
|    |     |     | 9576.43606 fts    | -0.00128 fts | -0.00272 fts | 0.00679 fts |
| DX | 552 | 734 | -4337.58184 fts   | 0.01722 fts  | 0.00823 fts  | 0.00620 fts |
| DY |     |     | -98896.72557 fts  | 0.00115 fts  | 0.00433 fts  | 0.00614 fts |
| DZ |     |     | -27457.58455 fts  | -0.02211 fts | -0.02644 fts | 0.00676 fts |
| DX | 552 | 709 | 27091.44332 fts   | 0.03169 fts  | 0.00492 fts  | 0.00636 fts |
| DY |     |     | -24297.47148 fts  | 0.01427 fts  | 0.02913 fts  | 0.00633 fts |
| DZ |     |     | 4059.28292 fts    | -0.00476 fts | -0.01893 fts | 0.00669 fts |
| DX | 552 | 705 | -16537.98146 fts  | 0.00390 fts  | -0.00010 fts | 0.00505 fts |
| DY |     |     | 21967.72112 fts   | 0.00259 fts  | 0.00118 fts  | 0.00499 fts |
| DZ |     |     | -1696.46308 fts   | -0.00728 fts | -0.00860 fts | 0.00558 fts |
| DX | 552 | 703 | -22065.13861 fts  | 0.00157 fts  | -0.00020 fts | 0.00512 fts |
| DY |     |     | 26864.42980 fts   | 0.00121 fts  | -0.00177 fts | 0.00505 fts |
| DZ |     |     | -2740.84189 fts   | -0.00833 fts | -0.00840 fts | 0.00564 fts |
| DX | 552 | 403 | 26765.21737 fts   | 0.00062 fts  | -0.00351 fts | 0.00866 fts |
| DY |     |     | 13151.44771 fts   | 0.00453 fts  | 0.00840 fts  | 0.00860 fts |
| DZ |     |     | 13483.85459 fts   | 0.01352 fts  | 0.01096 fts  | 0.00909 fts |
| DX | 552 | 401 | -26449.53024 fts  | 0.00154 fts  | -0.00315 fts | 0.00440 fts |
| DY |     |     | 17086.85641 fts   | 0.00472 fts  | -0.00430 fts | 0.00433 fts |
| DZ |     |     | -6955.93589 fts   | -0.01827 fts | -0.01818 fts | 0.00482 fts |
| DX | 703 | 705 | 5527.15715 fts    | 0.00125 fts  | 0.00072 fts  | 0.00495 fts |
| DY |     |     | -4896.70868 fts   | -0.00007 fts | 0.00062 fts  | 0.00486 fts |
| DZ |     |     | 1044.37882 fts    | -0.00069 fts | -0.00105 fts | 0.00574 fts |
| DX | 403 | 741 | -2988.60344 fts   | 0.00046 fts  | -0.00187 fts | 0.00689 fts |
| DY |     |     | 2417.67879 fts    | 0.00253 fts  | -0.00069 fts | 0.00669 fts |
| DZ |     |     | -594.65705 fts    | -0.00535 fts | -0.00558 fts | 0.00846 fts |
| DX | 403 | 402 | -36050.78892 fts  | 0.03609 fts  | 0.01975 fts  | 0.00981 fts |
| DY |     |     | -85383.26453 fts  | -0.00052 fts | 0.00843 fts  | 0.00971 fts |
| DZ |     |     | -36102.64627 fts  | -0.04472 fts | -0.05328 fts | 0.01037 fts |
| DX | 702 | 729 | 39241.02372 fts   | 0.00377 fts  | 0.01716 fts  | 0.00364 fts |
| DY |     |     | -65192.67834 fts  | -0.01791 fts | 0.03379 fts  | 0.00358 fts |
| DZ |     |     | -875.99661 fts    | 0.09291 fts  | 0.08678 fts  | 0.00413 fts |
| DX | 702 | 709 | 47625.07653 fts   | -0.01532 fts | -0.00020 fts | 0.00640 fts |
| DY |     |     | -16167.54959 fts  | -0.00948 fts | 0.00627 fts  | 0.00636 fts |
| DZ |     |     | 14963.99159 fts   | 0.05299 fts  | 0.05561 fts  | 0.00673 fts |
| DX | 702 | 705 | 3995.65175 fts    | -0.00374 fts | -0.00656 fts | 0.00505 fts |
| DY |     |     | 30097.64299 fts   | 0.00541 fts  | 0.00062 fts  | 0.00499 fts |
| DZ |     |     | 9208.24563 fts    | 0.00207 fts  | 0.00200 fts  | 0.00558 fts |
| DX | 702 | 703 | -1531.50537 fts   | -0.00584 fts | -0.00633 fts | 0.00509 fts |
| DY |     |     | 34994.35166 fts   | 0.00381 fts  | 0.00069 fts  | 0.00502 fts |
| DZ |     |     | 8163.86681 fts    | 0.00781 fts  | 0.00830 fts  | 0.00564 fts |
| DX | 708 | 734 | 3425.50873 fts    | -0.01749 fts | -0.01276 fts | 0.00610 fts |
| DY |     |     | -25483.59060 fts  | 0.00394 fts  | -0.00669 fts | 0.00604 fts |
| DZ |     |     | -5154.24770 fts   | 0.01102 fts  | 0.01535 fts  | 0.00663 fts |
| DX | 708 | 403 | 34528.30794 fts   | 0.00190 fts  | -0.00715 fts | 0.00869 fts |
| DY |     |     | 86564.58264 fts   | 0.00974 fts  | -0.00574 fts | 0.00866 fts |
| DZ |     |     | 35787.19145 fts   | -0.02802 fts | -0.02825 fts | 0.00912 fts |
| DX | 551 | 741 | 54781.67479 fts   | 0.00722 fts  | 0.00512 fts  | 0.01037 fts |
| DY |     |     | -3404.52682 fts   | -0.00151 fts | 0.00128 fts  | 0.01024 fts |
| DZ |     |     | 21189.16205 fts   | -0.00833 fts | -0.00981 fts | 0.01132 fts |
| DX | 551 | 734 | 26667.47901 fts   | 0.02320 fts  | 0.00387 fts  | 0.00738 fts |
| DY |     |     | -117870.37886 fts | 0.01001 fts  | -0.00814 fts | 0.00732 fts |
| DZ |     |     | -19157.62002 fts  | -0.07221 fts | -0.07598 fts | 0.00797 fts |
| DX | 551 | 709 | 58096.50418 fts   | -0.01542 fts | -0.01453 fts | 0.00709 fts |
| DY |     |     | -43271.12478 fts  | 0.00745 fts  | -0.01319 fts | 0.00702 fts |

|    |     |     |                  |              |              |             |
|----|-----|-----|------------------|--------------|--------------|-------------|
|    |     |     | 12359.24746 fts  | -0.01165 fts | -0.00666 fts | 0.00748 fts |
| DX | 551 | 705 | 14467.07940 fts  | 0.00184 fts  | 0.00092 fts  | 0.00489 fts |
| DY |     |     | 2994.06780 fts   | 0.00007 fts  | 0.00315 fts  | 0.00479 fts |
| DZ |     |     | 6603.50146 fts   | 0.00400 fts  | 0.00295 fts  | 0.00561 fts |
| DX | 551 | 703 | 8939.92228 fts   | 0.00069 fts  | 0.00125 fts  | 0.00482 fts |
| DY |     |     | 7890.77651 fts   | -0.00102 fts | 0.00262 fts  | 0.00472 fts |
| DZ |     |     | 5559.12264 fts   | 0.00607 fts  | 0.00545 fts  | 0.00558 fts |
| DX | 551 | 403 | 57770.27823 fts  | 0.01798 fts  | -0.00466 fts | 0.00909 fts |
| DY |     |     | -5822.20558 fts  | 0.01677 fts  | -0.00144 fts | 0.00902 fts |
| DZ |     |     | 21783.81913 fts  | -0.05476 fts | -0.05981 fts | 0.00955 fts |
| DX | 709 | 704 | -75355.48587 fts | 0.01135 fts  | -0.00052 fts | 0.00810 fts |
| DY |     |     | 54208.69099 fts  | 0.00791 fts  | 0.00896 fts  | 0.00807 fts |
| DZ |     |     | -16376.56088 fts | -0.00840 fts | -0.01348 fts | 0.00856 fts |
| DX | 1   | 704 | -54428.42959 fts | 0.00522 fts  | 0.01230 fts  | 0.00663 fts |
| DY |     |     | 103951.41733 fts | -0.01125 fts | -0.01050 fts | 0.00656 fts |
| DZ |     |     | 4627.22063 fts   | -0.02100 fts | -0.01824 fts | 0.00719 fts |
| DX | 1   | 701 | -14957.48363 fts | -0.00289 fts | -0.01486 fts | 0.01099 fts |
| DY |     |     | 56204.02273 fts  | 0.01581 fts  | -0.01480 fts | 0.01093 fts |
| DZ |     |     | 8256.82066 fts   | -0.04767 fts | -0.04573 fts | 0.01168 fts |
| DX | 552 | 704 | -48264.04255 fts | 0.00745 fts  | -0.00102 fts | 0.00614 fts |
| DY |     |     | 29911.21951 fts  | 0.00591 fts  | 0.00630 fts  | 0.00607 fts |
| DZ |     |     | -12317.27796 fts | -0.00531 fts | -0.00883 fts | 0.00659 fts |
| DX | 702 | 704 | -27730.40930 fts | -0.01325 fts | -0.01033 fts | 0.00614 fts |
| DY |     |     | 38041.14137 fts  | 0.00381 fts  | -0.00374 fts | 0.00607 fts |
| DZ |     |     | -1412.56925 fts  | 0.01070 fts  | 0.01355 fts  | 0.00656 fts |
| DX | 551 | 704 | -17258.98166 fts | -0.00243 fts | -0.00033 fts | 0.00587 fts |
| DY |     |     | 10937.56618 fts  | -0.00115 fts | -0.00036 fts | 0.00581 fts |
| DZ |     |     | -4017.31342 fts  | 0.00482 fts  | 0.00548 fts  | 0.00646 fts |
| DX | 551 | 1   | 37169.44794 fts  | -0.00325 fts | -0.01706 fts | 0.00518 fts |
| DY |     |     | -93013.85114 fts | 0.01811 fts  | 0.00974 fts  | 0.00512 fts |
| DZ |     |     | -8644.53406 fts  | 0.00830 fts  | 0.00456 fts  | 0.00571 fts |
| DX | 729 | 706 | -25734.60588 fts | 0.01421 fts  | 0.00220 fts  | 0.00377 fts |
| DY |     |     | 15335.11579 fts  | 0.00656 fts  | 0.02484 fts  | 0.00361 fts |
| DZ |     |     | -6334.11135 fts  | 0.02536 fts  | 0.01637 fts  | 0.00502 fts |
| DX | 729 | 706 | -25734.60588 fts | 0.00433 fts  | 0.00906 fts  | 0.00377 fts |
| DY |     |     | 15335.11579 fts  | -0.00797 fts | 0.00266 fts  | 0.00361 fts |
| DZ |     |     | -6334.11135 fts  | 0.00768 fts  | 0.00722 fts  | 0.00502 fts |
| DX | 1   | 552 | -6164.38705 fts  | -0.01591 fts | 0.00423 fts  | 0.00328 fts |
| DY |     |     | 74040.19782 fts  | -0.01529 fts | -0.02110 fts | 0.00322 fts |
| DZ |     |     | 16944.49859 fts  | -0.00354 fts | 0.00604 fts  | 0.00381 fts |
| DX | 1   | 552 | -6164.38705 fts  | 0.00003 fts  | 0.00791 fts  | 0.00328 fts |
| DY |     |     | 74040.19782 fts  | -0.00935 fts | -0.02402 fts | 0.00322 fts |
| DZ |     |     | 16944.49859 fts  | -0.04564 fts | -0.03914 fts | 0.00381 fts |
| DX | 706 | 708 | -735.87517 fts   | 0.00951 fts  | 0.01703 fts  | 0.00262 fts |
| DY |     |     | -15425.65051 fts | -0.01414 fts | -0.00709 fts | 0.00233 fts |
| DZ |     |     | -4188.52023 fts  | -0.01745 fts | -0.01594 fts | 0.00463 fts |
| DX | 706 | 708 | -735.87517 fts   | -0.00430 fts | -0.00820 fts | 0.00262 fts |
| DY |     |     | -15425.65051 fts | 0.00699 fts  | 0.01099 fts  | 0.00233 fts |
| DZ |     |     | -4188.52023 fts  | 0.02543 fts  | 0.02293 fts  | 0.00463 fts |
| DX | 552 | 708 | -7763.09058 fts  | 0.01608 fts  | 0.01663 fts  | 0.00194 fts |
| DY |     |     | -73413.13493 fts | -0.00951 fts | 0.01047 fts  | 0.00194 fts |
| DZ |     |     | -22303.33689 fts | 0.00659 fts  | 0.00236 fts  | 0.00203 fts |
| DX | 552 | 708 | -7763.09058 fts  | -0.00397 fts | 0.00338 fts  | 0.00194 fts |
| DY |     |     | -73413.13493 fts | -0.00653 fts | 0.00659 fts  | 0.00194 fts |

|    |     |     |                  |              |              |             |
|----|-----|-----|------------------|--------------|--------------|-------------|
|    |     |     | -22303.33689 fts | 0.03012 fts  | 0.03018 fts  | 0.00203 fts |
| DX | 551 | 708 | 23241.97028 fts  | -0.00039 fts | 0.00203 fts  | 0.00466 fts |
| DY |     |     | -92386.78826 fts | -0.00266 fts | -0.00482 fts | 0.00459 fts |
| DZ |     |     | -14003.37235 fts | -0.00761 fts | -0.00614 fts | 0.00505 fts |
| DX | 551 | 708 | 23241.97028 fts  | 0.00190 fts  | -0.00010 fts | 0.00466 fts |
| DY |     |     | -92386.78826 fts | 0.00135 fts  | -0.00879 fts | 0.00459 fts |
| DZ |     |     | -14003.37235 fts | -0.02559 fts | -0.02415 fts | 0.00505 fts |
| DX | 551 | 552 | 31005.06086 fts  | -0.00240 fts | -0.00423 fts | 0.00453 fts |
| DY |     |     | -18973.65329 fts | 0.00351 fts  | 0.00322 fts  | 0.00446 fts |
| DZ |     |     | 8299.96454 fts   | 0.00787 fts  | 0.00719 fts  | 0.00492 fts |
| DX | 551 | 552 | 31005.06086 fts  | 0.00489 fts  | 0.00846 fts  | 0.00453 fts |
| DY |     |     | -18973.65329 fts | -0.00692 fts | -0.00814 fts | 0.00446 fts |
| DZ |     |     | 8299.96454 fts   | -0.02011 fts | -0.01837 fts | 0.00492 fts |
| DX | 705 | 401 | -9911.54878 fts  | 0.00197 fts  | -0.00174 fts | 0.00440 fts |
| DY |     |     | -4880.86471 fts  | 0.00328 fts  | 0.00207 fts  | 0.00430 fts |
| DZ |     |     | -5259.47281 fts  | -0.00240 fts | -0.00361 fts | 0.00505 fts |
| DX | 705 | 401 | -9911.54878 fts  | 0.00079 fts  | 0.00138 fts  | 0.00440 fts |
| DY |     |     | -4880.86471 fts  | -0.00115 fts | -0.00338 fts | 0.00430 fts |
| DZ |     |     | -5259.47281 fts  | -0.00807 fts | -0.00732 fts | 0.00505 fts |
| DX | 729 | 402 | -27992.96206 fts | 0.01184 fts  | 0.01991 fts  | 0.00538 fts |
| DY |     |     | 1090.78342 fts   | -0.01608 fts | 0.00305 fts  | 0.00531 fts |
| DZ |     |     | -10838.08639 fts | 0.00446 fts  | 0.00351 fts  | 0.00591 fts |
| DX | 729 | 402 | -27992.96206 fts | -0.00308 fts | -0.02123 fts | 0.00538 fts |
| DY |     |     | 1090.78342 fts   | 0.02326 fts  | 0.00722 fts  | 0.00531 fts |
| DZ |     |     | -10838.08639 fts | -0.00427 fts | -0.00814 fts | 0.00591 fts |
| DX | 709 | 401 | -53540.97356 fts | 0.01440 fts  | -0.00262 fts | 0.00689 fts |
| DY |     |     | 41384.32789 fts  | 0.01234 fts  | -0.00906 fts | 0.00686 fts |
| DZ |     |     | -11015.21882 fts | -0.06142 fts | -0.06358 fts | 0.00728 fts |
| DX | 709 | 401 | -53540.97356 fts | 0.02365 fts  | 0.00719 fts  | 0.00689 fts |
| DY |     |     | 41384.32789 fts  | 0.00659 fts  | 0.01398 fts  | 0.00686 fts |
| DZ |     |     | -11015.21882 fts | -0.01716 fts | -0.02549 fts | 0.00728 fts |
| DX | 734 | 402 | -4947.98971 fts  | 0.00643 fts  | 0.02011 fts  | 0.00643 fts |
| DY |     |     | 26664.90874 fts  | -0.01982 fts | -0.00581 fts | 0.00636 fts |
| DZ |     |     | 4838.79288 fts   | -0.00230 fts | 0.00020 fts  | 0.00699 fts |
| DX | 734 | 402 | -4947.98971 fts  | -0.01818 fts | -0.02123 fts | 0.00643 fts |
| DY |     |     | 26664.90874 fts  | 0.01352 fts  | -0.00223 fts | 0.00636 fts |
| DZ |     |     | 4838.79288 fts   | 0.01158 fts  | 0.01388 fts  | 0.00699 fts |
| DX | 1   | 402 | -15449.95860 fts | 0.00705 fts  | 0.02244 fts  | 0.00515 fts |
| DY |     |     | 1808.38103 fts   | -0.02218 fts | -0.00128 fts | 0.00509 fts |
| DZ |     |     | -5674.29311 fts  | 0.00984 fts  | 0.01148 fts  | 0.00568 fts |
| DX | 1   | 402 | -15449.95860 fts | -0.01860 fts | -0.02385 fts | 0.00515 fts |
| DY |     |     | 1808.38103 fts   | 0.01640 fts  | 0.00089 fts  | 0.00509 fts |
| DZ |     |     | -5674.29311 fts  | 0.01644 fts  | 0.01775 fts  | 0.00568 fts |
| DX | 1   | 401 | -32613.91732 fts | 0.00915 fts  | 0.03750 fts  | 0.00509 fts |
| DY |     |     | 91127.05426 fts  | -0.03871 fts | -0.02674 fts | 0.00502 fts |
| DZ |     |     | 9988.56270 fts   | -0.03458 fts | -0.02562 fts | 0.00561 fts |
| DX | 1   | 401 | -32613.91732 fts | 0.01581 fts  | 0.02556 fts  | 0.00509 fts |
| DY |     |     | 91127.05426 fts  | -0.02024 fts | -0.01250 fts | 0.00502 fts |
| DZ |     |     | 9988.56270 fts   | -0.03422 fts | -0.03196 fts | 0.00561 fts |
| DX | 704 | 401 | 21814.51231 fts  | -0.00889 fts | -0.00423 fts | 0.00558 fts |
| DY |     |     | -12824.36310 fts | -0.00056 fts | -0.00249 fts | 0.00551 fts |
| DZ |     |     | 5361.34207 fts   | 0.01076 fts  | 0.01306 fts  | 0.00610 fts |
| DX | 704 | 401 | 21814.51231 fts  | -0.00200 fts | -0.00033 fts | 0.00558 fts |
| DY |     |     | -12824.36310 fts | -0.00089 fts | -0.00344 fts | 0.00551 fts |

|    |     |     |                  |              |              |             |
|----|-----|-----|------------------|--------------|--------------|-------------|
|    |     |     | 5361.34207 fts   | -0.00348 fts | -0.00223 fts | 0.00610 fts |
| DX | 552 | 729 | 18707.39051 fts  | 0.00860 fts  | 0.01437 fts  | 0.00361 fts |
| DY |     |     | -73322.60024 fts | -0.01158 fts | 0.02303 fts  | 0.00354 fts |
| DZ |     |     | -11780.70531 fts | 0.05200 fts  | 0.04662 fts  | 0.00407 fts |
| DX | 552 | 729 | 18707.39051 fts  | 0.02657 fts  | 0.00430 fts  | 0.00361 fts |
| DY |     |     | -73322.60024 fts | 0.01175 fts  | 0.01234 fts  | 0.00354 fts |
| DZ |     |     | -11780.70531 fts | -0.03225 fts | -0.04140 fts | 0.00407 fts |
| DX | 552 | 402 | -9285.57155 fts  | 0.03980 fts  | 0.00817 fts  | 0.00561 fts |
| DY |     |     | -72231.81682 fts | 0.01558 fts  | -0.00505 fts | 0.00554 fts |
| DZ |     |     | -22618.79170 fts | -0.10131 fts | -0.10955 fts | 0.00623 fts |
| DX | 552 | 402 | -9285.57155 fts  | 0.02762 fts  | -0.00436 fts | 0.00561 fts |
| DY |     |     | -72231.81682 fts | 0.02267 fts  | 0.01444 fts  | 0.00554 fts |
| DZ |     |     | -22618.79170 fts | -0.04160 fts | -0.05276 fts | 0.00623 fts |
| DX | 703 | 401 | -4384.39162 fts  | -0.00112 fts | -0.00059 fts | 0.00433 fts |
| DY |     |     | -9777.57339 fts  | 0.00000 fts  | 0.00000 fts  | 0.00427 fts |
| DZ |     |     | -4215.09400 fts  | 0.00203 fts  | 0.00223 fts  | 0.00502 fts |
| DX | 703 | 401 | -4384.39162 fts  | -0.00056 fts | 0.00003 fts  | 0.00433 fts |
| DY |     |     | -9777.57339 fts  | -0.00039 fts | -0.00062 fts | 0.00427 fts |
| DZ |     |     | -4215.09400 fts  | 0.00000 fts  | 0.00030 fts  | 0.00502 fts |
| DX | 702 | 401 | -5915.89703 fts  | -0.00154 fts | -0.00374 fts | 0.00436 fts |
| DY |     |     | 25216.77827 fts  | 0.00344 fts  | 0.00600 fts  | 0.00433 fts |
| DZ |     |     | 3948.77281 fts   | 0.01296 fts  | 0.01148 fts  | 0.00479 fts |
| DX | 702 | 401 | -5915.89703 fts  | 0.00138 fts  | -0.00384 fts | 0.00436 fts |
| DY |     |     | 25216.77827 fts  | 0.00541 fts  | 0.00758 fts  | 0.00433 fts |
| DZ |     |     | 3948.77281 fts   | 0.00912 fts  | 0.00653 fts  | 0.00479 fts |
| DX | 551 | 729 | 49712.45136 fts  | -0.00761 fts | -0.00410 fts | 0.00538 fts |
| DY |     |     | -92296.25353 fts | 0.00003 fts  | 0.00594 fts  | 0.00531 fts |
| DZ |     |     | -3480.74077 fts  | 0.02762 fts  | 0.02772 fts  | 0.00587 fts |
| DX | 551 | 729 | 49712.45136 fts  | 0.02090 fts  | -0.00016 fts | 0.00538 fts |
| DY |     |     | -92296.25353 fts | 0.01332 fts  | -0.00525 fts | 0.00531 fts |
| DZ |     |     | -3480.74077 fts  | -0.06503 fts | -0.06939 fts | 0.00587 fts |
| DX | 551 | 401 | 4555.53062 fts   | -0.00285 fts | 0.00036 fts  | 0.00390 fts |
| DY |     |     | -1886.79688 fts  | -0.00220 fts | 0.00213 fts  | 0.00381 fts |
| DZ |     |     | 1344.02864 fts   | 0.01260 fts  | 0.01293 fts  | 0.00459 fts |
| DX | 551 | 401 | 4555.53062 fts   | 0.00056 fts  | 0.00141 fts  | 0.00390 fts |
| DY |     |     | -1886.79688 fts  | -0.00131 fts | 0.00157 fts  | 0.00381 fts |
| DZ |     |     | 1344.02864 fts   | 0.00417 fts  | 0.00387 fts  | 0.00459 fts |
| DX | 1   | 706 | -13191.60246 fts | 0.00879 fts  | -0.00417 fts | 0.00341 fts |
| DY |     |     | 16052.71340 fts  | 0.01060 fts  | 0.01814 fts  | 0.00325 fts |
| DZ |     |     | -1170.31807 fts  | 0.01467 fts  | 0.00768 fts  | 0.00469 fts |
| DX | 1   | 706 | -13191.60246 fts | 0.01978 fts  | 0.00909 fts  | 0.00341 fts |
| DY |     |     | 16052.71340 fts  | 0.00194 fts  | 0.01257 fts  | 0.00325 fts |
| DZ |     |     | -1170.31807 fts  | -0.00807 fts | -0.01483 fts | 0.00469 fts |
| DX | 1   | 706 | -13191.60246 fts | 0.00171 fts  | 0.00476 fts  | 0.00341 fts |
| DY |     |     | 16052.71340 fts  | -0.00456 fts | 0.00069 fts  | 0.00325 fts |
| DZ |     |     | -1170.31807 fts  | 0.00381 fts  | 0.00387 fts  | 0.00469 fts |
| DX | 1   | 708 | -13927.47766 fts | -0.00653 fts | -0.00833 fts | 0.00302 fts |
| DY |     |     | 627.06289 fts    | 0.00571 fts  | 0.00305 fts  | 0.00299 fts |
| DZ |     |     | -5358.83830 fts  | 0.01220 fts  | 0.01207 fts  | 0.00351 fts |
| DX | 1   | 708 | -13927.47766 fts | 0.00627 fts  | 0.01070 fts  | 0.00302 fts |
| DY |     |     | 627.06289 fts    | -0.00869 fts | 0.00354 fts  | 0.00299 fts |
| DZ |     |     | -5358.83830 fts  | 0.00712 fts  | 0.00620 fts  | 0.00351 fts |
| DX | 1   | 708 | -13927.47766 fts | -0.00594 fts | -0.00541 fts | 0.00302 fts |
| DY |     |     | 627.06289 fts    | 0.00259 fts  | 0.00801 fts  | 0.00299 fts |

|           |     |     |                  |              |              |             |
|-----------|-----|-----|------------------|--------------|--------------|-------------|
|           |     |     | -5358.83830 fts  | 0.02638 fts  | 0.02539 fts  | 0.00351 fts |
| <b>DX</b> | 1   | 708 | -13927.47766 fts | 0.01470 fts  | 0.00535 fts  | 0.00302 fts |
| <b>DY</b> |     |     | 627.06289 fts    | 0.00312 fts  | 0.01358 fts  | 0.00299 fts |
| <b>DZ</b> |     |     | -5358.83830 fts  | 0.00200 fts  | -0.00417 fts | 0.00351 fts |
| <b>DX</b> | 729 | 708 | -26470.48108 fts | -0.00433 fts | -0.01004 fts | 0.00338 fts |
| <b>DY</b> |     |     | -90.53473 fts    | 0.00915 fts  | -0.00220 fts | 0.00331 fts |
| <b>DZ</b> |     |     | -10522.63158 fts | -0.00801 fts | -0.00781 fts | 0.00381 fts |
| <b>DX</b> | 729 | 708 | -26470.48108 fts | 0.01037 fts  | 0.00866 fts  | 0.00338 fts |
| <b>DY</b> |     |     | -90.53473 fts    | -0.00364 fts | 0.00151 fts  | 0.00331 fts |
| <b>DZ</b> |     |     | -10522.63158 fts | -0.01076 fts | -0.01260 fts | 0.00381 fts |
| <b>DX</b> | 729 | 708 | -26470.48108 fts | -0.00272 fts | -0.00390 fts | 0.00338 fts |
| <b>DY</b> |     |     | -90.53473 fts    | 0.00289 fts  | 0.01171 fts  | 0.00331 fts |
| <b>DZ</b> |     |     | -10522.63158 fts | 0.02900 fts  | 0.02654 fts  | 0.00381 fts |
| <b>DX</b> | 729 | 708 | -26470.48108 fts | 0.02621 fts  | 0.02251 fts  | 0.00338 fts |
| <b>DY</b> |     |     | -90.53473 fts    | -0.00991 fts | 0.00531 fts  | 0.00331 fts |
| <b>DZ</b> |     |     | -10522.63158 fts | -0.02287 fts | -0.02779 fts | 0.00381 fts |
| <b>DX</b> | 729 | 708 | -26470.48108 fts | 0.01115 fts  | 0.00630 fts  | 0.00338 fts |
| <b>DY</b> |     |     | -90.53473 fts    | -0.00026 fts | 0.01421 fts  | 0.00331 fts |
| <b>DZ</b> |     |     | -10522.63158 fts | 0.01375 fts  | 0.00850 fts  | 0.00381 fts |
| <b>DX</b> | 1   | 729 | 12543.00342 fts  | -0.00433 fts | -0.00161 fts | 0.00305 fts |
| <b>DY</b> |     |     | 717.59761 fts    | -0.00085 fts | 0.00371 fts  | 0.00302 fts |
| <b>DZ</b> |     |     | 5163.79328 fts   | 0.01745 fts  | 0.01752 fts  | 0.00348 fts |
| <b>DX</b> | 1   | 729 | 12543.00342 fts  | 0.00548 fts  | -0.00056 fts | 0.00305 fts |
| <b>DY</b> |     |     | 717.59761 fts    | 0.00417 fts  | -0.00361 fts | 0.00302 fts |
| <b>DZ</b> |     |     | 5163.79328 fts   | -0.02297 fts | -0.02372 fts | 0.00348 fts |
| <b>DX</b> | 1   | 729 | 12543.00342 fts  | 0.00020 fts  | 0.00554 fts  | 0.00305 fts |
| <b>DY</b> |     |     | 717.59761 fts    | -0.00646 fts | 0.00581 fts  | 0.00302 fts |
| <b>DZ</b> |     |     | 5163.79328 fts   | 0.02070 fts  | 0.02014 fts  | 0.00348 fts |
| <b>DX</b> | 1   | 729 | 12543.00342 fts  | -0.00256 fts | -0.00112 fts | 0.00305 fts |
| <b>DY</b> |     |     | 717.59761 fts    | -0.00033 fts | -0.00279 fts | 0.00302 fts |
| <b>DZ</b> |     |     | 5163.79328 fts   | -0.00161 fts | -0.00046 fts | 0.00348 fts |
| <b>DX</b> | 1   | 729 | 12543.00342 fts  | 0.00666 fts  | -0.00030 fts | 0.00305 fts |
| <b>DY</b> |     |     | 717.59761 fts    | 0.00463 fts  | -0.00095 fts | 0.00302 fts |
| <b>DZ</b> |     |     | 5163.79328 fts   | -0.01946 fts | -0.02103 fts | 0.00348 fts |
| <b>DX</b> | 1   | 729 | 12543.00342 fts  | 0.00367 fts  | -0.00164 fts | 0.00305 fts |
| <b>DY</b> |     |     | 717.59761 fts    | 0.00433 fts  | 0.00148 fts  | 0.00302 fts |
| <b>DZ</b> |     |     | 5163.79328 fts   | -0.00807 fts | -0.00961 fts | 0.00348 fts |

#### GPS Baseline Vector Residuals

|    | Station | Target | Adj vector [fts] | Resid [fts] | Resid [ppm] |
|----|---------|--------|------------------|-------------|-------------|
| DV | 729     | 707    | 34760.55098      | 0.04318     | 1.2         |
| DV | 709     | 708    | 65743.24798      | 0.02818     | 0.4         |
| DV | 709     | 707    | 58863.45396      | 0.02415     | 0.4         |
| DV | 1       | 707    | 23273.74161      | 0.03701     | 1.6         |
| DV | 1       | 702    | 71368.25503      | 0.06673     | 0.9         |
| DV | 701     | 707    | 44331.58371      | 0.02822     | 0.6         |
| DV | 552     | 707    | 64989.95286      | 0.02516     | 0.4         |
| DV | 552     | 706    | 61156.16640      | 0.01385     | 0.2         |
| DV | 702     | 708    | 67490.09848      | 0.06604     | 1.0         |
| DV | 702     | 707    | 53781.72305      | 0.04751     | 0.9         |
| DV | 702     | 552    | 24630.03033      | 0.00804     | 0.3         |
| DV | 708     | 707    | 13902.94378      | 0.03451     | 2.5         |
| DV | 551     | 707    | 82454.34877      | 0.04685     | 0.6         |

|    |     |     |              |         |     |
|----|-----|-----|--------------|---------|-----|
| DV | 551 | 702 | 29172.57748  | 0.00492 | 0.2 |
| DV | 729 | 741 | 92390.69330  | 0.09285 | 1.0 |
| DV | 729 | 734 | 37826.85794  | 0.00525 | 0.1 |
| DV | 729 | 709 | 52198.28366  | 0.06352 | 1.2 |
| DV | 729 | 403 | 90448.81165  | 0.02493 | 0.3 |
| DV | 709 | 705 | 63852.35599  | 0.02589 | 0.4 |
| DV | 709 | 703 | 71275.18071  | 0.01033 | 0.1 |
| DV | 734 | 403 | 123281.70462 | 0.00699 | 0.1 |
| DV | 1   | 734 | 28959.68401  | 0.00722 | 0.2 |
| DV | 1   | 709 | 57908.88832  | 0.02720 | 0.5 |
| DV | 1   | 705 | 99826.95340  | 0.05049 | 0.5 |
| DV | 1   | 703 | 105737.38157 | 0.03114 | 0.3 |
| DV | 1   | 403 | 94618.50738  | 0.05797 | 0.6 |
| DV | 701 | 709 | 38625.55585  | 0.03159 | 0.8 |
| DV | 706 | 734 | 42048.63198  | 0.02444 | 0.6 |
| DV | 704 | 705 | 34386.68096  | 0.00623 | 0.2 |
| DV | 704 | 703 | 28060.17859  | 0.00394 | 0.1 |
| DV | 552 | 734 | 102729.23581 | 0.02805 | 0.3 |
| DV | 552 | 709 | 36616.81578  | 0.03507 | 1.0 |
| DV | 552 | 705 | 27549.29382  | 0.00866 | 0.3 |
| DV | 552 | 703 | 34872.34069  | 0.00856 | 0.2 |
| DV | 552 | 403 | 32728.45508  | 0.01427 | 0.4 |
| DV | 552 | 401 | 32247.84266  | 0.01893 | 0.6 |
| DV | 703 | 705 | 7457.74424   | 0.00141 | 0.2 |
| DV | 403 | 741 | 3889.79924   | 0.00591 | 1.5 |
| DV | 403 | 402 | 99465.38247  | 0.05745 | 0.6 |
| DV | 702 | 729 | 76096.71887  | 0.09468 | 1.2 |
| DV | 702 | 709 | 52473.40870  | 0.05597 | 1.1 |
| DV | 702 | 705 | 31727.35623  | 0.00689 | 0.2 |
| DV | 702 | 703 | 35966.63565  | 0.01050 | 0.3 |
| DV | 708 | 734 | 26224.29732  | 0.02106 | 0.8 |
| DV | 708 | 403 | 99831.62872  | 0.02972 | 0.3 |
| DV | 551 | 741 | 58835.39142  | 0.01115 | 0.2 |
| DV | 551 | 734 | 122358.46949 | 0.07651 | 0.6 |
| DV | 551 | 709 | 73487.03994  | 0.02073 | 0.3 |
| DV | 551 | 705 | 16182.30701  | 0.00443 | 0.3 |
| DV | 551 | 703 | 13156.38281  | 0.00620 | 0.5 |
| DV | 551 | 403 | 62014.82000  | 0.06001 | 1.0 |
| DV | 709 | 704 | 94261.46174  | 0.01621 | 0.2 |
| DV | 1   | 704 | 117429.81855 | 0.02438 | 0.2 |
| DV | 1   | 701 | 58743.45561  | 0.05033 | 0.9 |
| DV | 552 | 704 | 58101.75722  | 0.01089 | 0.2 |
| DV | 702 | 704 | 47096.70253  | 0.01745 | 0.4 |
| DV | 551 | 704 | 20824.06324  | 0.00551 | 0.3 |
| DV | 551 | 1   | 100537.91490 | 0.02018 | 0.2 |
| DV | 729 | 706 | 30619.54742  | 0.02982 | 1.0 |
| DV | 729 | 706 | 30619.54742  | 0.01188 | 0.4 |
| DV | 1   | 552 | 76204.11140  | 0.02234 | 0.3 |
| DV | 1   | 552 | 76204.11140  | 0.04659 | 0.6 |
| DV | 706 | 708 | 16001.12210  | 0.02438 | 1.5 |
| DV | 706 | 708 | 16001.12210  | 0.02674 | 1.7 |
| DV | 552 | 708 | 77118.04455  | 0.01982 | 0.3 |
| DV | 552 | 708 | 77118.04455  | 0.03107 | 0.4 |
| DV | 551 | 708 | 96289.15965  | 0.00807 | 0.1 |

|    |     |     |              |         |     |
|----|-----|-----|--------------|---------|-----|
|    | 551 | 708 | 96289.15965  | 0.02569 | 0.3 |
| DV | 551 | 552 | 37285.42251  | 0.00896 | 0.2 |
| DV | 551 | 552 | 37285.42251  | 0.02182 | 0.6 |
| DV | 705 | 401 | 12236.16336  | 0.00453 | 0.4 |
| DV | 705 | 401 | 12236.16336  | 0.00820 | 0.7 |
| DV | 729 | 402 | 30037.64055  | 0.02047 | 0.7 |
| DV | 729 | 402 | 30037.64055  | 0.02385 | 0.8 |
| DV | 709 | 401 | 68561.16606  | 0.06427 | 0.9 |
| DV | 709 | 401 | 68561.16606  | 0.02995 | 0.4 |
| DV | 734 | 402 | 27548.39156  | 0.02096 | 0.8 |
| DV | 734 | 402 | 27548.39156  | 0.02546 | 0.9 |
| DV | 1   | 402 | 16558.05137  | 0.02526 | 1.5 |
| DV | 1   | 402 | 16558.05137  | 0.02972 | 1.8 |
| DV | 1   | 401 | 97301.48509  | 0.05269 | 0.5 |
| DV | 1   | 401 | 97301.48509  | 0.04278 | 0.4 |
| DV | 704 | 401 | 25866.60443  | 0.01394 | 0.5 |
| DV | 704 | 401 | 25866.60443  | 0.00410 | 0.2 |
| DV | 552 | 729 | 76582.99539  | 0.05397 | 0.7 |
| DV | 552 | 729 | 76582.99539  | 0.04341 | 0.6 |
| DV | 552 | 402 | 76257.89755  | 0.10997 | 1.4 |
| DV | 552 | 402 | 76257.89755  | 0.05486 | 0.7 |
| DV | 703 | 401 | 11514.80998  | 0.00230 | 0.2 |
| DV | 703 | 401 | 11514.80998  | 0.00069 | 0.1 |
| DV | 702 | 401 | 26200.69753  | 0.01348 | 0.5 |
| DV | 702 | 401 | 26200.69753  | 0.01070 | 0.4 |
| DV | 551 | 729 | 104890.61824 | 0.02867 | 0.3 |
| DV | 551 | 729 | 104890.61824 | 0.06959 | 0.7 |
| DV | 551 | 401 | 5110.70198   | 0.01312 | 2.6 |
| DV | 551 | 401 | 5110.70198   | 0.00443 | 0.9 |
| DV | 1   | 706 | 20810.51724  | 0.02011 | 1.0 |
| DV | 1   | 706 | 20810.51724  | 0.02146 | 1.0 |
| DV | 1   | 706 | 20810.51724  | 0.00620 | 0.3 |
| DV | 1   | 708 | 14936.02990  | 0.01499 | 1.0 |
| DV | 1   | 708 | 14936.02990  | 0.01286 | 0.9 |
| DV | 1   | 708 | 14936.02990  | 0.02717 | 1.8 |
| DV | 1   | 708 | 14936.02990  | 0.01519 | 1.0 |
| DV | 729 | 708 | 28485.44086  | 0.01289 | 0.5 |
| DV | 729 | 708 | 28485.44086  | 0.01539 | 0.5 |
| DV | 729 | 708 | 28485.44086  | 0.02927 | 1.0 |
| DV | 729 | 708 | 28485.44086  | 0.03619 | 1.3 |
| DV | 729 | 708 | 28485.44086  | 0.01772 | 0.6 |
| DV | 1   | 729 | 13583.32221  | 0.01798 | 1.3 |
| DV | 1   | 729 | 13583.32221  | 0.02398 | 1.8 |
| DV | 1   | 729 | 13583.32221  | 0.02169 | 1.6 |
| DV | 1   | 729 | 13583.32221  | 0.00302 | 0.2 |
| DV | 1   | 729 | 13583.32221  | 0.02106 | 1.6 |
| DV | 1   | 729 | 13583.32221  | 0.00984 | 0.7 |

#### Absolute Error Ellipses (2D - 39.4% 1D - 68.3%)

| Station | A [fts] | B [fts] | A/B | Phi | Sd Hgt [fts] |
|---------|---------|---------|-----|-----|--------------|
| 1       | 0.00292 | 0.00285 | 1.0 | 11° | 0.00344      |
| 401     | 0.00351 | 0.00338 | 1.0 | 11° | 0.00387      |
| 402     | 0.00551 | 0.00538 | 1.0 | 11° | 0.00597      |



|     |         |         |     |     |         |
|-----|---------|---------|-----|-----|---------|
| 403 | 0.00856 | 0.00846 | 1.0 | 11° | 0.00886 |
| 551 | 0.00000 | 0.00000 | 1.0 | 13° | 0.00000 |
| 552 | 0.00000 | 0.00000 | 1.0 | 12° | 0.00000 |
| 701 | 0.01089 | 0.01073 | 1.0 | 11° | 0.01155 |
| 702 | 0.00000 | 0.00000 | 1.0 | 12° | 0.00000 |
| 703 | 0.00449 | 0.00433 | 1.0 | 11° | 0.00489 |
| 704 | 0.00561 | 0.00548 | 1.0 | 11° | 0.00594 |
| 705 | 0.00449 | 0.00436 | 1.0 | 11° | 0.00489 |
| 706 | 0.00000 | 0.00000 | 1.0 | 11° | 0.00492 |
| 707 | 0.00000 | 0.00000 | 1.0 | 11° | 0.00620 |
| 708 | 0.00000 | 0.00000 | 1.0 | 11° | 0.00000 |
| 709 | 0.00623 | 0.00617 | 1.0 | 11° | 0.00646 |
| 729 | 0.00328 | 0.00322 | 1.0 | 11° | 0.00371 |
| 734 | 0.00610 | 0.00597 | 1.0 | 11° | 0.00653 |
| 741 | 0.01010 | 0.00984 | 1.0 | 11° | 0.01073 |

## Testing and Estimated Errors

### Coordinate Tests

| Station |           | MDB         | BNR  | W-Test                                                                                      | T-Test                                                                                      |
|---------|-----------|-------------|------|---------------------------------------------------------------------------------------------|---------------------------------------------------------------------------------------------|
| 551     | Latitude  | 1.12062 fts | 0.0  | -0.04                                                                                       | 0.00                                                                                        |
|         | Longitude | 0.91391 fts | 0.1  | -0.03                                                                                       |                                                                                             |
|         | Height    | 2.79992 fts | 0.0  | 0.04                                                                                        |                                                                                             |
| 552     | Latitude  | 0.01769 fts | 12.6 | 1.54                                                                                        | 1.80                                                                                        |
|         | Longitude | 0.01746 fts | 12.7 | -0.01                                                                                       |                                                                                             |
|         | Height    | 0.01888 fts | 12.8 | -1.80                                                                                       |                                                                                             |
| 702     | Latitude  | 0.01999 fts | 13.7 | 1.61                                                                                        | 7.61   |
|         | Longitude | 0.01969 fts | 13.8 | -0.96                                                                                       |                                                                                             |
|         | Height    | 0.02121 fts | 13.7 | 4.32   |                                                                                             |
| 706     | Latitude  | 0.01740 fts | 9.0  | -1.67                                                                                       | 1.43                                                                                        |
|         | Longitude | 0.01697 fts | 9.0  | 0.24                                                                                        |                                                                                             |
| 707     | Latitude  | 0.02133 fts | 10.7 | 3.80   | 16.92  |
|         | Longitude | 0.02086 fts | 10.6 | 4.37   |                                                                                             |
| 708     | Latitude  | 0.01425 fts | 8.3  | -3.56  | 8.14   |
|         | Longitude | 0.01393 fts | 8.2  | -2.44                                                                                       |                                                                                             |
|         | Height    | 0.02095 fts | 12.2 | -2.26                                                                                       |                                                                                             |

### Observation Tests

|    | Station | Target | MDB         | Red | BNR | W-Test                                                                                      | T-Test                                                                                     |
|----|---------|--------|-------------|-----|-----|---------------------------------------------------------------------------------------------|--------------------------------------------------------------------------------------------|
| DX | 729     | 707    | 0.05370 fts | 92  | 1.0 | -2.07                                                                                       | 2.81                                                                                       |
| DY |         |        | 0.05302 fts | 93  | 0.9 | 0.93                                                                                        |                                                                                            |
| DZ |         |        | 0.05985 fts | 84  | 1.5 | -1.89                                                                                       |                                                                                            |
| DX | 709     | 708    | 0.08361 fts | 92  | 1.0 | 0.81                                                                                        | 0.50                                                                                       |
| DY |         |        | 0.08333 fts | 92  | 1.0 | -0.44                                                                                       |                                                                                            |
| DZ |         |        | 0.08609 fts | 92  | 1.0 | 0.81                                                                                        |                                                                                            |
| DX | 709     | 707    | 0.07781 fts | 90  | 1.1 | -0.38                                                                                       | 0.46                                                                                       |
| DY |         |        | 0.07735 fts | 90  | 1.1 | 1.10                                                                                        |                                                                                            |
| DZ |         |        | 0.08200 fts | 86  | 1.3 | -0.11                                                                                       |                                                                                            |
| DX | 1       | 707    | 0.04358 fts | 89  | 1.2 | -3.03  | 3.38  |
| DY |         |        | 0.04272 fts | 90  | 1.1 | 0.78                                                                                        |                                                                                            |
| DZ |         |        | 0.05122 fts | 78  | 1.8 | -0.83                                                                                       |                                                                                            |



|           |     |     |             |    |     |       |                                                                                                                                                                              |
|-----------|-----|-----|-------------|----|-----|-------|------------------------------------------------------------------------------------------------------------------------------------------------------------------------------|
| <b>DX</b> | 1   | 702 | 0.08653 fts | 98 | 0.5 | -0.14 | 2.30                                                                                                                                                                         |
| <b>DY</b> |     |     | 0.08626 fts | 98 | 0.4 | -0.07 |                                                                                                                                                                              |
| <b>DZ</b> |     |     | 0.08890 fts | 97 | 0.5 | -2.62 |                                                                                           |
| <b>DX</b> | 701 | 707 | 0.07681 fts | 61 | 2.7 | -1.97 | 1.36                                                                                                                                                                         |
| <b>DY</b> |     |     | 0.07622 fts | 62 | 2.7 | 0.19  |                                                                                                                                                                              |
| <b>DZ</b> |     |     | 0.08201 fts | 59 | 2.8 | -0.44 |                                                                                                                                                                              |
| <b>DX</b> | 552 | 707 | 0.08044 fts | 98 | 0.5 | -0.32 | 0.39                                                                                                                                                                         |
| <b>DY</b> |     |     | 0.07998 fts | 98 | 0.4 | 1.03  |                                                                                                                                                                              |
| <b>DZ</b> |     |     | 0.08462 fts | 93 | 0.9 | 0.12  |                                                                                                                                                                              |
| <b>DX</b> | 552 | 706 | 0.07670 fts | 98 | 0.4 | -0.61 | 0.13                                                                                                                                                                         |
| <b>DY</b> |     |     | 0.07629 fts | 98 | 0.4 | -0.12 |                                                                                                                                                                              |
| <b>DZ</b> |     |     | 0.08033 fts | 95 | 0.7 | -0.02 |                                                                                                                                                                              |
| <b>DX</b> | 702 | 708 | 0.08239 fts | 99 | 0.3 | 0.28  | 2.42                                                                                                                                                                         |
| <b>DY</b> |     |     | 0.08213 fts | 99 | 0.3 | -0.94 |                                                                                                                                                                              |
| <b>DZ</b> |     |     | 0.08463 fts | 99 | 0.3 | 2.51  |                                                                                                                                                                              |
| <b>DX</b> | 702 | 707 | 0.07005 fts | 97 | 0.5 | -0.62 | 1.86                                                                                                                                                                         |
| <b>DY</b> |     |     | 0.06951 fts | 98 | 0.4 | 0.66  |                                                                                                                                                                              |
| <b>DZ</b> |     |     | 0.07487 fts | 92 | 1.0 | 2.17  |                                                                                                                                                                              |
| <b>DX</b> | 702 | 552 | 0.04293 fts | 97 | 0.5 | -0.08 | 0.13                                                                                                                                                                         |
| <b>DY</b> |     |     | 0.04243 fts | 97 | 0.5 | 0.49  |                                                                                                                                                                              |
| <b>DZ</b> |     |     | 0.04708 fts | 97 | 0.5 | 0.40  |                                                                                                                                                                              |
| <b>DX</b> | 708 | 707 | 0.03488 fts | 90 | 1.1 | -3.17 |  4.15  |
| <b>DY</b> |     |     | 0.03377 fts | 92 | 1.0 | 0.06  |                                                                                                                                                                              |
| <b>DZ</b> |     |     | 0.04467 fts | 73 | 2.1 | -1.93 |                                                                                                                                                                              |
| <b>DX</b> | 551 | 707 | 0.09793 fts | 96 | 0.6 | -0.63 | 0.95                                                                                                                                                                         |
| <b>DY</b> |     |     | 0.09753 fts | 96 | 0.6 | 1.28  |                                                                                                                                                                              |
| <b>DZ</b> |     |     | 0.10143 fts | 93 | 0.9 | -0.91 |                                                                                                                                                                              |
| <b>DX</b> | 551 | 702 | 0.04934 fts | 88 | 1.2 | -0.11 | 0.05                                                                                                                                                                         |
| <b>DY</b> |     |     | 0.04885 fts | 88 | 1.2 | -0.29 |                                                                                                                                                                              |
| <b>DZ</b> |     |     | 0.05344 fts | 88 | 1.2 | 0.22  |                                                                                                                                                                              |
| <b>DX</b> | 729 | 741 | 0.11210 fts | 88 | 1.2 | -0.79 | 3.35                                                                                    |
| <b>DY</b> |     |     | 0.11176 fts | 89 | 1.2 | -1.53 |                                                                                                                                                                              |
| <b>DZ</b> |     |     | 0.11511 fts | 87 | 1.3 | 2.66  |                                                                                         |
| <b>DX</b> | 729 | 734 | 0.05909 fts | 84 | 1.4 | -0.11 | 0.04                                                                                                                                                                         |
| <b>DY</b> |     |     | 0.05867 fts | 84 | 1.4 | 0.22  |                                                                                                                                                                              |
| <b>DZ</b> |     |     | 0.06288 fts | 84 | 1.5 | 0.24  |                                                                                                                                                                              |
| <b>DX</b> | 729 | 709 | 0.07216 fts | 88 | 1.3 | -0.58 | 3.61                                                                                    |
| <b>DY</b> |     |     | 0.07183 fts | 88 | 1.3 | 0.19  |                                                                                                                                                                              |
| <b>DZ</b> |     |     | 0.07516 fts | 87 | 1.3 | -3.24 |                                                                                         |
| <b>DX</b> | 729 | 403 | 0.10863 fts | 91 | 1.1 | -0.36 | 0.24                                                                                                                                                                         |
| <b>DY</b> |     |     | 0.10838 fts | 91 | 1.0 | -0.27 |                                                                                                                                                                              |
| <b>DZ</b> |     |     | 0.11084 fts | 90 | 1.1 | 0.72  |                                                                                                                                                                              |
| <b>DX</b> | 709 | 705 | 0.08300 fts | 89 | 1.1 | -0.28 | 0.45                                                                                                                                                                         |
| <b>DY</b> |     |     | 0.08269 fts | 89 | 1.1 | -0.19 |                                                                                                                                                                              |
| <b>DZ</b> |     |     | 0.08579 fts | 89 | 1.2 | -1.11 |                                                                                                                                                                              |
| <b>DX</b> | 709 | 703 | 0.08963 fts | 91 | 1.1 | -0.06 | 0.06                                                                                                                                                                         |
| <b>DY</b> |     |     | 0.08934 fts | 91 | 1.0 | -0.14 |                                                                                                                                                                              |
| <b>DZ</b> |     |     | 0.09222 fts | 90 | 1.1 | -0.40 |                                                                                                                                                                              |
| <b>DX</b> | 734 | 403 | 0.13980 fts | 93 | 0.9 | -0.16 | 0.01                                                                                                                                                                         |
| <b>DY</b> |     |     | 0.13959 fts | 93 | 0.9 | 0.08  |                                                                                                                                                                              |
| <b>DZ</b> |     |     | 0.14165 fts | 92 | 1.0 | -0.01 |                                                                                                                                                                              |
| <b>DX</b> | 1   | 734 | 0.05175 fts | 80 | 1.7 | -0.21 | 0.10                                                                                                                                                                         |
| <b>DY</b> |     |     | 0.05126 fts | 80 | 1.7 | 0.01  |                                                                                                                                                                              |

|    |     |     |             |    |     |       |                                                                                            |
|----|-----|-----|-------------|----|-----|-------|--------------------------------------------------------------------------------------------|
| DZ |     |     | 0.05602 fts | 80 | 1.7 | 0.51  |                                                                                            |
| DX | 1   | 709 | 0.07695 fts | 90 | 1.1 | -0.98 | 0.59                                                                                       |
| DY |     |     | 0.07663 fts | 90 | 1.1 | -0.52 |                                                                                            |
| DZ |     |     | 0.07974 fts | 89 | 1.1 | -0.72 |                                                                                            |
| DX | 1   | 705 | 0.11445 fts | 97 | 0.6 | -0.60 | 0.79                                                                                       |
| DY |     |     | 0.11422 fts | 97 | 0.6 | -0.83 |                                                                                            |
| DZ |     |     | 0.11646 fts | 96 | 0.7 | -1.16 |                                                                                            |
| DX | 1   | 703 | 0.12001 fts | 97 | 0.6 | -0.31 | 0.27                                                                                       |
| DY |     |     | 0.11979 fts | 97 | 0.6 | -0.65 |                                                                                            |
| DZ |     |     | 0.12193 fts | 96 | 0.6 | -0.55 |                                                                                            |
| DX | 1   | 403 | 0.11233 fts | 92 | 1.0 | 0.57  | 1.20                                                                                       |
| DY |     |     | 0.11209 fts | 92 | 1.0 | -0.27 |                                                                                            |
| DZ |     |     | 0.11447 fts | 91 | 1.0 | -1.79 |                                                                                            |
| DX | 701 | 709 | 0.07589 fts | 52 | 3.2 | 1.81  | 2.30                                                                                       |
| DY |     |     | 0.07538 fts | 52 | 3.2 | 0.56  |                                                                                            |
| DZ |     |     | 0.08025 fts | 52 | 3.2 | -1.81 |                                                                                            |
| DX | 706 | 734 | 0.06273 fts | 86 | 1.4 | 0.46  | 0.80                                                                                       |
| DY |     |     | 0.06223 fts | 86 | 1.3 | -1.47 |                                                                                            |
| DZ |     |     | 0.06719 fts | 83 | 1.5 | 0.18  |                                                                                            |
| DX | 704 | 705 | 0.05640 fts | 82 | 1.6 | 0.35  | 0.07                                                                                       |
| DY |     |     | 0.05589 fts | 82 | 1.6 | 0.27  |                                                                                            |
| DZ |     |     | 0.06061 fts | 81 | 1.6 | -0.11 |                                                                                            |
| DX | 704 | 703 | 0.05138 fts | 78 | 1.8 | 0.29  | 0.04                                                                                       |
| DY |     |     | 0.05081 fts | 78 | 1.8 | 0.12  |                                                                                            |
| DZ |     |     | 0.05599 fts | 77 | 1.8 | -0.10 |                                                                                            |
| DX | 552 | 734 | 0.11750 fts | 96 | 0.6 | 0.52  | 0.23                                                                                       |
| DY |     |     | 0.11728 fts | 96 | 0.6 | 0.03  |                                                                                            |
| DZ |     |     | 0.11945 fts | 96 | 0.7 | -0.66 |                                                                                            |
| DX | 552 | 709 | 0.05839 fts | 83 | 1.5 | 2.23  | 2.03                                                                                       |
| DY |     |     | 0.05798 fts | 83 | 1.5 | 1.01  |                                                                                            |
| DZ |     |     | 0.06193 fts | 83 | 1.5 | -0.31 |                                                                                            |
| DX | 552 | 705 | 0.04880 fts | 85 | 1.4 | 0.32  | 0.15                                                                                       |
| DY |     |     | 0.04828 fts | 85 | 1.4 | 0.22  |                                                                                            |
| DZ |     |     | 0.05318 fts | 84 | 1.4 | -0.55 |                                                                                            |
| DX | 552 | 703 | 0.05493 fts | 88 | 1.2 | 0.11  | 0.11                                                                                       |
| DY |     |     | 0.05446 fts | 88 | 1.2 | 0.09  |                                                                                            |
| DZ |     |     | 0.05887 fts | 87 | 1.3 | -0.55 |                                                                                            |
| DX | 552 | 403 | 0.06183 fts | 64 | 2.5 | 0.05  | 0.43                                                                                       |
| DY |     |     | 0.06140 fts | 64 | 2.5 | 0.39  |                                                                                            |
| DZ |     |     | 0.06554 fts | 66 | 2.4 | 1.06  |                                                                                            |
| DX | 552 | 401 | 0.05177 fts | 90 | 1.1 | 0.11  | 0.56                                                                                       |
| DY |     |     | 0.05131 fts | 90 | 1.1 | 0.35  |                                                                                            |
| DZ |     |     | 0.05568 fts | 90 | 1.1 | -1.24 |                                                                                            |
| DX | 703 | 705 | 0.03507 fts | 62 | 2.6 | 0.19  | 0.01                                                                                       |
| DY |     |     | 0.03425 fts | 62 | 2.7 | -0.01 |                                                                                            |
| DZ |     |     | 0.04154 fts | 66 | 2.4 | -0.09 |                                                                                            |
| DX | 403 | 741 | 0.07350 fts | 11 | 9.4 | 0.19  | 1.07                                                                                       |
| DY |     |     | 0.07299 fts | 11 | 9.7 | 1.07  |                                                                                            |
| DZ |     |     | 0.07795 fts | 16 | 7.7 | -1.42 |                                                                                            |
| DX | 403 | 402 | 0.11773 fts | 91 | 1.1 | 1.15  | 1.10                                                                                       |
| DY |     |     | 0.11748 fts | 91 | 1.1 | -0.02 |                                                                                            |
| DZ |     |     | 0.11996 fts | 90 | 1.1 | -1.41 |                                                                                            |
| DX | 702 | 729 | 0.09110 fts | 98 | 0.5 | 0.14  | 4.21  |

|    |     |     |             |    |     |       |                                                                                       |      |
|----|-----|-----|-------------|----|-----|-------|---------------------------------------------------------------------------------------|------|
| DY |     |     | 0.09085 fts | 98 | 0.5 | -0.69 |                                                                                       |      |
| DZ |     |     | 0.09335 fts | 97 | 0.5 | 3.48  |    |      |
| DX | 702 | 709 | 0.07181 fts | 89 | 1.2 | -0.81 |                                                                                       | 2.75 |
| DY |     |     | 0.07147 fts | 89 | 1.2 | -0.50 |                                                                                       |      |
| DZ |     |     | 0.07472 fts | 89 | 1.2 | 2.71  |    |      |
| DX | 702 | 705 | 0.05222 fts | 87 | 1.3 | -0.28 |                                                                                       | 0.09 |
| DY |     |     | 0.05174 fts | 87 | 1.3 | 0.41  |                                                                                       |      |
| DZ |     |     | 0.05633 fts | 86 | 1.3 | 0.15  |                                                                                       |      |
| DX | 702 | 703 | 0.05585 fts | 89 | 1.2 | -0.40 |                                                                                       | 0.16 |
| DY |     |     | 0.05539 fts | 89 | 1.2 | 0.26  |                                                                                       |      |
| DZ |     |     | 0.05973 fts | 88 | 1.2 | 0.51  |                                                                                       |      |
| DX | 708 | 734 | 0.04984 fts | 77 | 1.8 | -1.55 |                                                                                       | 1.11 |
| DY |     |     | 0.04932 fts | 77 | 1.8 | 0.35  |                                                                                       |      |
| DZ |     |     | 0.05434 fts | 77 | 1.8 | 0.89  |                                                                                       |      |
| DX | 708 | 403 | 0.11688 fts | 93 | 0.9 | 0.06  |                                                                                       | 0.28 |
| DY |     |     | 0.11666 fts | 93 | 0.9 | 0.31  |                                                                                       |      |
| DZ |     |     | 0.11886 fts | 92 | 1.0 | -0.87 |                                                                                       |      |
| DX | 551 | 741 | 0.08425 fts | 77 | 1.9 | 0.38  |                                                                                       | 0.11 |
| DY |     |     | 0.08374 fts | 77 | 1.8 | -0.08 |                                                                                       |      |
| DZ |     |     | 0.08858 fts | 74 | 2.0 | -0.43 |                                                                                       |      |
| DX | 551 | 734 | 0.13664 fts | 96 | 0.7 | 0.60  |                                                                                       | 1.29 |
| DY |     |     | 0.13643 fts | 96 | 0.6 | 0.26  |                                                                                       |      |
| DZ |     |     | 0.13841 fts | 95 | 0.7 | -1.86 |                                                                                       |      |
| DX | 551 | 709 | 0.09129 fts | 92 | 1.0 | -0.63 |                                                                                       | 0.23 |
| DY |     |     | 0.09101 fts | 92 | 1.0 | 0.30  |                                                                                       |      |
| DZ |     |     | 0.09371 fts | 91 | 1.0 | -0.46 |                                                                                       |      |
| DX | 551 | 705 | 0.03987 fts | 77 | 1.9 | 0.20  |                                                                                       | 0.06 |
| DY |     |     | 0.03917 fts | 77 | 1.9 | 0.01  |                                                                                       |      |
| DZ |     |     | 0.04553 fts | 77 | 1.9 | 0.39  |                                                                                       |      |
| DX | 551 | 703 | 0.03772 fts | 74 | 2.0 | 0.09  |                                                                                       | 0.14 |
| DY |     |     | 0.03697 fts | 74 | 2.0 | -0.13 |                                                                                       |      |
| DZ |     |     | 0.04368 fts | 74 | 2.0 | 0.64  |                                                                                       |      |
| DX | 551 | 403 | 0.08409 fts | 83 | 1.5 | 0.87  |                                                                                       | 2.71 |
| DY |     |     | 0.08375 fts | 83 | 1.5 | 0.82  |                                                                                       |      |
| DZ |     |     | 0.08702 fts | 83 | 1.5 | -2.59 |  |      |
| DX | 709 | 704 | 0.11121 fts | 93 | 0.9 | 0.37  |                                                                                       | 0.09 |
| DY |     |     | 0.11098 fts | 93 | 0.9 | 0.26  |                                                                                       |      |
| DZ |     |     | 0.11331 fts | 92 | 1.0 | -0.27 |                                                                                       |      |
| DX | 1   | 704 | 0.13154 fts | 96 | 0.6 | 0.14  |                                                                                       | 0.14 |
| DY |     |     | 0.13134 fts | 96 | 0.6 | -0.30 |                                                                                       |      |
| DZ |     |     | 0.13330 fts | 96 | 0.7 | -0.56 |                                                                                       |      |
| DX | 1   | 701 | 0.08579 fts | 74 | 2.0 | -0.16 |                                                                                       | 2.34 |
| DY |     |     | 0.08537 fts | 74 | 2.0 | 0.85  |                                                                                       |      |
| DZ |     |     | 0.08951 fts | 72 | 2.1 | -2.50 |                                                                                       |      |
| DX | 552 | 704 | 0.07647 fts | 91 | 1.0 | 0.36  |                                                                                       | 0.09 |
| DY |     |     | 0.07614 fts | 91 | 1.0 | 0.29  |                                                                                       |      |
| DZ |     |     | 0.07933 fts | 91 | 1.1 | -0.25 |                                                                                       |      |
| DX | 702 | 704 | 0.06679 fts | 88 | 1.2 | -0.76 |                                                                                       | 0.33 |
| DY |     |     | 0.06641 fts | 89 | 1.2 | 0.22  |                                                                                       |      |
| DZ |     |     | 0.07006 fts | 88 | 1.2 | 0.59  |                                                                                       |      |
| DX | 551 | 704 | 0.04556 fts | 73 | 2.0 | -0.25 |                                                                                       | 0.09 |
| DY |     |     | 0.04495 fts | 73 | 2.1 | -0.12 |                                                                                       |      |
| DZ |     |     | 0.05055 fts | 74 | 2.0 | 0.44  |                                                                                       |      |

|           |     |     |             |    |     |       |      |
|-----------|-----|-----|-------------|----|-----|-------|------|
| <b>DX</b> | 551 | 1   | 0.11482 fts | 97 | 0.5 | -0.10 | 0.13 |
| <b>DY</b> |     |     | 0.11460 fts | 97 | 0.5 | 0.55  |      |
| <b>DZ</b> |     |     | 0.11672 fts | 97 | 0.6 | 0.25  |      |
| <b>DX</b> | 729 | 706 | 0.04965 fts | 92 | 1.0 | 1.05  | 1.48 |
| <b>DY</b> |     |     | 0.04909 fts | 93 | 0.9 | 0.49  |      |
| <b>DZ</b> |     |     | 0.05465 fts | 88 | 1.2 | 1.78  |      |
| <b>DX</b> | 729 | 706 | 0.04965 fts | 92 | 1.0 | 0.32  | 0.25 |
| <b>DY</b> |     |     | 0.04909 fts | 93 | 0.9 | -0.60 |      |
| <b>DZ</b> |     |     | 0.05465 fts | 88 | 1.2 | 0.54  |      |
| <b>DX</b> | 1   | 552 | 0.09104 fts | 98 | 0.4 | -0.61 | 0.24 |
| <b>DY</b> |     |     | 0.09078 fts | 98 | 0.4 | -0.58 |      |
| <b>DZ</b> |     |     | 0.09328 fts | 98 | 0.5 | -0.13 |      |
| <b>DX</b> | 1   | 552 | 0.09104 fts | 98 | 0.4 | 0.00  | 1.01 |
| <b>DY</b> |     |     | 0.09078 fts | 98 | 0.4 | -0.36 |      |
| <b>DZ</b> |     |     | 0.09328 fts | 98 | 0.5 | -1.70 |      |
| <b>DX</b> | 706 | 708 | 0.03609 fts | 93 | 0.9 | 0.96  | 1.89 |
| <b>DY</b> |     |     | 0.03525 fts | 94 | 0.8 | -1.45 |      |
| <b>DZ</b> |     |     | 0.04337 fts | 84 | 1.5 | -1.63 |      |
| <b>DX</b> | 706 | 708 | 0.03609 fts | 93 | 0.9 | -0.44 | 2.12 |
| <b>DY</b> |     |     | 0.03525 fts | 94 | 0.8 | 0.72  |      |
| <b>DZ</b> |     |     | 0.04337 fts | 84 | 1.5 | 2.38  |      |
| <b>DX</b> | 552 | 708 | 0.09144 fts | 99 | 0.2 | 0.60  | 0.18 |
| <b>DY</b> |     |     | 0.09121 fts | 99 | 0.2 | -0.36 |      |
| <b>DZ</b> |     |     | 0.09347 fts | 99 | 0.3 | 0.24  |      |
| <b>DX</b> | 552 | 708 | 0.09144 fts | 99 | 0.2 | -0.15 | 0.44 |
| <b>DY</b> |     |     | 0.09121 fts | 99 | 0.2 | -0.25 |      |
| <b>DZ</b> |     |     | 0.09347 fts | 99 | 0.3 | 1.11  |      |
| <b>DX</b> | 551 | 708 | 0.11055 fts | 97 | 0.5 | -0.01 | 0.02 |
| <b>DY</b> |     |     | 0.11034 fts | 97 | 0.5 | -0.08 |      |
| <b>DZ</b> |     |     | 0.11241 fts | 97 | 0.5 | -0.24 |      |
| <b>DX</b> | 551 | 708 | 0.11055 fts | 97 | 0.5 | 0.06  | 0.21 |
| <b>DY</b> |     |     | 0.11034 fts | 97 | 0.5 | 0.04  |      |
| <b>DZ</b> |     |     | 0.11241 fts | 97 | 0.5 | -0.80 |      |
| <b>DX</b> | 551 | 552 | 0.05628 fts | 91 | 1.0 | -0.16 | 0.11 |
| <b>DY</b> |     |     | 0.05585 fts | 91 | 1.0 | 0.23  |      |
| <b>DZ</b> |     |     | 0.05989 fts | 91 | 1.1 | 0.49  |      |
| <b>DX</b> | 551 | 552 | 0.05628 fts | 91 | 1.0 | 0.32  | 0.63 |
| <b>DY</b> |     |     | 0.05585 fts | 91 | 1.0 | -0.46 |      |
| <b>DZ</b> |     |     | 0.05989 fts | 91 | 1.1 | -1.26 |      |
| <b>DX</b> | 705 | 401 | 0.03596 fts | 77 | 1.8 | 0.24  | 0.10 |
| <b>DY</b> |     |     | 0.03522 fts | 77 | 1.8 | 0.41  |      |
| <b>DZ</b> |     |     | 0.04188 fts | 78 | 1.8 | -0.25 |      |
| <b>DX</b> | 705 | 401 | 0.03596 fts | 77 | 1.8 | 0.10  | 0.25 |
| <b>DY</b> |     |     | 0.03522 fts | 77 | 1.8 | -0.14 |      |
| <b>DZ</b> |     |     | 0.04188 fts | 78 | 1.8 | -0.84 |      |
| <b>DX</b> | 729 | 402 | 0.05132 fts | 84 | 1.4 | 0.93  | 0.86 |
| <b>DY</b> |     |     | 0.05083 fts | 85 | 1.4 | -1.27 |      |
| <b>DZ</b> |     |     | 0.05558 fts | 84 | 1.5 | 0.33  |      |
| <b>DX</b> | 729 | 402 | 0.05132 fts | 84 | 1.4 | -0.24 | 1.18 |
| <b>DY</b> |     |     | 0.05083 fts | 85 | 1.4 | 1.84  |      |
| <b>DZ</b> |     |     | 0.05558 fts | 84 | 1.5 | -0.31 |      |
| <b>DX</b> | 709 | 401 | 0.08666 fts | 91 | 1.0 | 0.62  | 2.42 |
| <b>DY</b> |     |     | 0.08638 fts | 92 | 1.0 | 0.53  |      |
| <b>DZ</b> |     |     | 0.08918 fts | 91 | 1.0 | -2.57 |      |

|    |     |     |             |    |     |       |      |                                                                                       |
|----|-----|-----|-------------|----|-----|-------|------|---------------------------------------------------------------------------------------|
|    | 709 | 401 | 0.08666 fts | 91 | 1.0 | 1.01  | 0.54 |                                                                                       |
| DY |     |     | 0.08638 fts | 92 | 1.0 | 0.28  |      |                                                                                       |
| DZ |     |     | 0.08918 fts | 91 | 1.0 | -0.72 |      |                                                                                       |
| DX | 734 | 402 | 0.05163 fts | 76 | 1.9 | 0.56  | 1.12 |                                                                                       |
| DY |     |     | 0.05112 fts | 76 | 1.9 | -1.74 |      |                                                                                       |
| DZ |     |     | 0.05609 fts | 76 | 1.9 | -0.18 |      |                                                                                       |
| DX | 734 | 402 | 0.05163 fts | 76 | 1.9 | -1.58 | 1.59 |                                                                                       |
| DY |     |     | 0.05112 fts | 76 | 1.9 | 1.19  |      |                                                                                       |
| DZ |     |     | 0.05609 fts | 76 | 1.9 | 0.93  |      |                                                                                       |
| DX | 1   | 402 | 0.04073 fts | 75 | 2.0 | 0.78  | 2.61 |                                                                                       |
| DY |     |     | 0.04012 fts | 75 | 2.0 | -2.51 |      |                                                                                       |
| DZ |     |     | 0.04595 fts | 76 | 1.9 | 0.95  |      |                                                                                       |
| DX | 1   | 402 | 0.04073 fts | 75 | 2.0 | -2.07 | 3.42 |    |
| DY |     |     | 0.04012 fts | 75 | 2.0 | 1.86  |      |                                                                                       |
| DZ |     |     | 0.04595 fts | 76 | 1.9 | 1.59  |      |                                                                                       |
| DX | 1   | 401 | 0.11173 fts | 97 | 0.5 | 0.29  | 0.90 |                                                                                       |
| DY |     |     | 0.11151 fts | 97 | 0.5 | -1.22 |      |                                                                                       |
| DZ |     |     | 0.11369 fts | 97 | 0.6 | -1.07 |      |                                                                                       |
| DX | 1   | 401 | 0.11173 fts | 97 | 0.5 | 0.50  | 0.59 |                                                                                       |
| DY |     |     | 0.11151 fts | 97 | 0.5 | -0.64 |      |                                                                                       |
| DZ |     |     | 0.11369 fts | 97 | 0.6 | -1.06 |      |                                                                                       |
| DX | 704 | 401 | 0.04844 fts | 80 | 1.7 | -0.77 | 0.45 |                                                                                       |
| DY |     |     | 0.04789 fts | 80 | 1.7 | -0.05 |      |                                                                                       |
| DZ |     |     | 0.05294 fts | 80 | 1.7 | 0.86  |      |                                                                                       |
| DX | 704 | 401 | 0.04844 fts | 80 | 1.7 | -0.18 | 0.04 |                                                                                       |
| DY |     |     | 0.04789 fts | 80 | 1.7 | -0.08 |      |                                                                                       |
| DZ |     |     | 0.05294 fts | 80 | 1.7 | -0.28 |      |                                                                                       |
| DX | 552 | 729 | 0.09153 fts | 98 | 0.5 | 0.33  | 1.35 |                                                                                       |
| DY |     |     | 0.09128 fts | 98 | 0.5 | -0.44 |      |                                                                                       |
| DZ |     |     | 0.09377 fts | 97 | 0.5 | 1.94  |      |                                                                                       |
| DX | 552 | 729 | 0.09153 fts | 98 | 0.5 | 1.01  | 0.89 |                                                                                       |
| DY |     |     | 0.09128 fts | 98 | 0.5 | 0.45  |      |                                                                                       |
| DZ |     |     | 0.09377 fts | 97 | 0.5 | -1.20 |      |                                                                                       |
| DX | 552 | 402 | 0.09249 fts | 95 | 0.7 | 1.54  | 5.86 |  |
| DY |     |     | 0.09221 fts | 95 | 0.7 | 0.60  |      |                                                                                       |
| DZ |     |     | 0.09495 fts | 94 | 0.8 | -3.85 |      |  |
| DX | 552 | 402 | 0.09249 fts | 95 | 0.7 | 1.07  | 1.47 |                                                                                       |
| DY |     |     | 0.09221 fts | 95 | 0.7 | 0.88  |      |                                                                                       |
| DZ |     |     | 0.09495 fts | 94 | 0.8 | -1.58 |      |                                                                                       |
| DX | 703 | 401 | 0.03538 fts | 77 | 1.9 | -0.14 | 0.02 |                                                                                       |
| DY |     |     | 0.03462 fts | 77 | 1.9 | 0.00  |      |                                                                                       |
| DZ |     |     | 0.04140 fts | 78 | 1.8 | 0.21  |      |                                                                                       |
| DX | 703 | 401 | 0.03538 fts | 77 | 1.9 | -0.07 | 0.00 |                                                                                       |
| DY |     |     | 0.03462 fts | 77 | 1.9 | -0.05 |      |                                                                                       |
| DZ |     |     | 0.04140 fts | 78 | 1.8 | 0.00  |      |                                                                                       |
| DX | 702 | 401 | 0.04664 fts | 88 | 1.2 | -0.13 | 0.36 |                                                                                       |
| DY |     |     | 0.04613 fts | 88 | 1.2 | 0.29  |      |                                                                                       |
| DZ |     |     | 0.05094 fts | 88 | 1.2 | 0.98  |      |                                                                                       |
| DX | 702 | 401 | 0.04664 fts | 88 | 1.2 | 0.12  | 0.23 |                                                                                       |
| DY |     |     | 0.04613 fts | 88 | 1.2 | 0.45  |      |                                                                                       |
| DZ |     |     | 0.05094 fts | 88 | 1.2 | 0.69  |      |                                                                                       |
| DX | 551 | 729 | 0.11902 fts | 97 | 0.5 | -0.22 | 0.23 |                                                                                       |
| DY |     |     | 0.11881 fts | 97 | 0.5 | 0.00  |      |                                                                                       |

|    |     |     |             |    |     |       |      |
|----|-----|-----|-------------|----|-----|-------|------|
| DZ |     |     | 0.12085 fts | 97 | 0.6 | 0.80  |      |
| DX | 551 | 729 | 0.11902 fts | 97 | 0.5 | 0.61  | 1.37 |
| DY |     |     | 0.11881 fts | 97 | 0.5 | 0.39  |      |
| DZ |     |     | 0.12085 fts | 97 | 0.6 | -1.89 |      |
| DX | 551 | 401 | 0.03027 fts | 73 | 2.0 | -0.44 | 0.88 |
| DY |     |     | 0.02940 fts | 73 | 2.1 | -0.35 |      |
| DZ |     |     | 0.03694 fts | 76 | 1.9 | 1.52  |      |
| DX | 551 | 401 | 0.03027 fts | 73 | 2.0 | 0.08  | 0.10 |
| DY |     |     | 0.02940 fts | 73 | 2.1 | -0.21 |      |
| DZ |     |     | 0.03694 fts | 76 | 1.9 | 0.50  |      |
| DX | 1   | 706 | 0.04093 fts | 91 | 1.1 | 0.81  | 1.02 |
| DY |     |     | 0.04026 fts | 91 | 1.0 | 0.98  |      |
| DZ |     |     | 0.04681 fts | 86 | 1.4 | 1.24  |      |
| DX | 1   | 706 | 0.04093 fts | 91 | 1.1 | 1.81  | 1.29 |
| DY |     |     | 0.04026 fts | 91 | 1.0 | 0.18  |      |
| DZ |     |     | 0.04681 fts | 86 | 1.4 | -0.68 |      |
| DX | 1   | 706 | 0.04093 fts | 91 | 1.1 | 0.16  | 0.10 |
| DY |     |     | 0.04026 fts | 91 | 1.0 | -0.42 |      |
| DZ |     |     | 0.04681 fts | 86 | 1.4 | 0.32  |      |
| DX | 1   | 708 | 0.03567 fts | 90 | 1.1 | -0.69 | 0.71 |
| DY |     |     | 0.03504 fts | 90 | 1.1 | 0.61  |      |
| DZ |     |     | 0.04102 fts | 90 | 1.1 | 1.12  |      |
| DX | 1   | 708 | 0.03567 fts | 90 | 1.1 | 0.66  | 0.58 |
| DY |     |     | 0.03504 fts | 90 | 1.1 | -0.93 |      |
| DZ |     |     | 0.04102 fts | 90 | 1.1 | 0.65  |      |
| DX | 1   | 708 | 0.03567 fts | 90 | 1.1 | -0.63 | 2.12 |
| DY |     |     | 0.03504 fts | 90 | 1.1 | 0.28  |      |
| DZ |     |     | 0.04102 fts | 90 | 1.1 | 2.43  |      |
| DX | 1   | 708 | 0.03567 fts | 90 | 1.1 | 1.55  | 0.85 |
| DY |     |     | 0.03504 fts | 90 | 1.1 | 0.34  |      |
| DZ |     |     | 0.04102 fts | 90 | 1.1 | 0.19  |      |
| DX | 729 | 708 | 0.04741 fts | 93 | 0.9 | -0.33 | 0.31 |
| DY |     |     | 0.04694 fts | 93 | 0.9 | 0.71  |      |
| DZ |     |     | 0.05154 fts | 93 | 0.9 | -0.57 |      |
| DX | 729 | 708 | 0.04741 fts | 93 | 0.9 | 0.80  | 0.43 |
| DY |     |     | 0.04694 fts | 93 | 0.9 | -0.28 |      |
| DZ |     |     | 0.05154 fts | 93 | 0.9 | -0.77 |      |
| DX | 729 | 708 | 0.04741 fts | 93 | 0.9 | -0.21 | 1.45 |
| DY |     |     | 0.04694 fts | 93 | 0.9 | 0.22  |      |
| DZ |     |     | 0.05154 fts | 93 | 0.9 | 2.06  |      |
| DX | 729 | 708 | 0.04741 fts | 93 | 0.9 | 2.02  | 2.44 |
| DY |     |     | 0.04694 fts | 93 | 0.9 | -0.77 |      |
| DZ |     |     | 0.05154 fts | 93 | 0.9 | -1.63 |      |
| DX | 729 | 708 | 0.04741 fts | 93 | 0.9 | 0.86  | 0.56 |
| DY |     |     | 0.04694 fts | 93 | 0.9 | -0.02 |      |
| DZ |     |     | 0.05154 fts | 93 | 0.9 | 0.98  |      |
| DX | 1   | 729 | 0.03463 fts | 89 | 1.2 | -0.48 | 0.98 |
| DY |     |     | 0.03399 fts | 89 | 1.2 | -0.10 |      |
| DZ |     |     | 0.04002 fts | 90 | 1.1 | 1.65  |      |
| DX | 1   | 729 | 0.03463 fts | 89 | 1.2 | 0.60  | 1.77 |
| DY |     |     | 0.03399 fts | 89 | 1.2 | 0.47  |      |
| DZ |     |     | 0.04002 fts | 90 | 1.1 | -2.17 |      |
| DX | 1   | 729 | 0.03463 fts | 89 | 1.2 | 0.02  | 1.45 |
| DY |     |     | 0.03399 fts | 89 | 1.2 | -0.72 |      |

|           |   |     |             |    |     |       |      |
|-----------|---|-----|-------------|----|-----|-------|------|
|           |   |     | 0.04002 fts | 90 | 1.1 | 1.96  |      |
| <b>DX</b> | 1 | 729 | 0.03463 fts | 89 | 1.2 | -0.28 | 0.03 |
| <b>DY</b> |   |     | 0.03399 fts | 89 | 1.2 | -0.04 |      |
| <b>DZ</b> |   |     | 0.04002 fts | 90 | 1.1 | -0.15 |      |
| <b>DX</b> | 1 | 729 | 0.03463 fts | 89 | 1.2 | 0.73  | 1.39 |
| <b>DY</b> |   |     | 0.03399 fts | 89 | 1.2 | 0.52  |      |
| <b>DZ</b> |   |     | 0.04002 fts | 90 | 1.1 | -1.84 |      |
| <b>DX</b> | 1 | 729 | 0.03463 fts | 89 | 1.2 | 0.40  | 0.33 |
| <b>DY</b> |   |     | 0.03399 fts | 89 | 1.2 | 0.48  |      |
| <b>DZ</b> |   |     | 0.04002 fts | 90 | 1.1 | -0.76 |      |

**Redundancy:**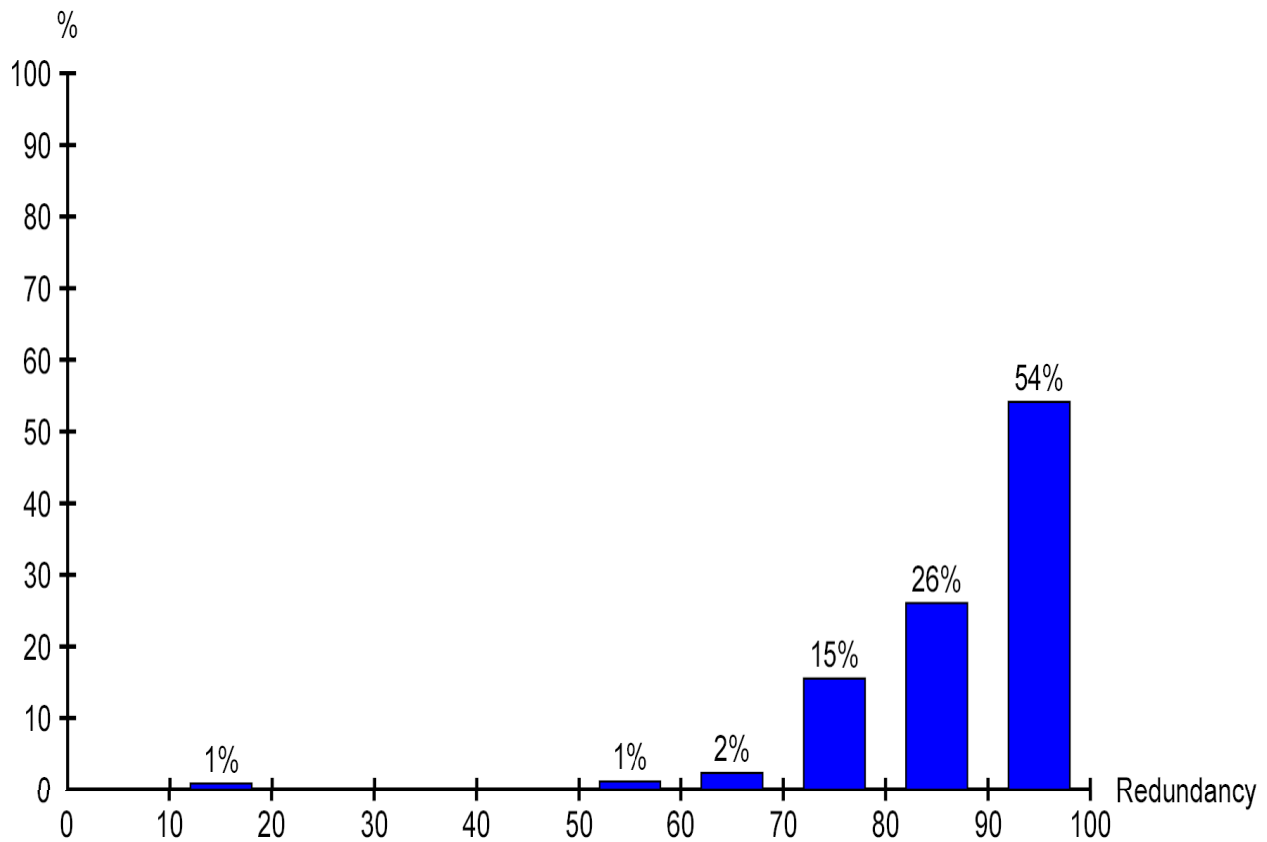**W-Test:**

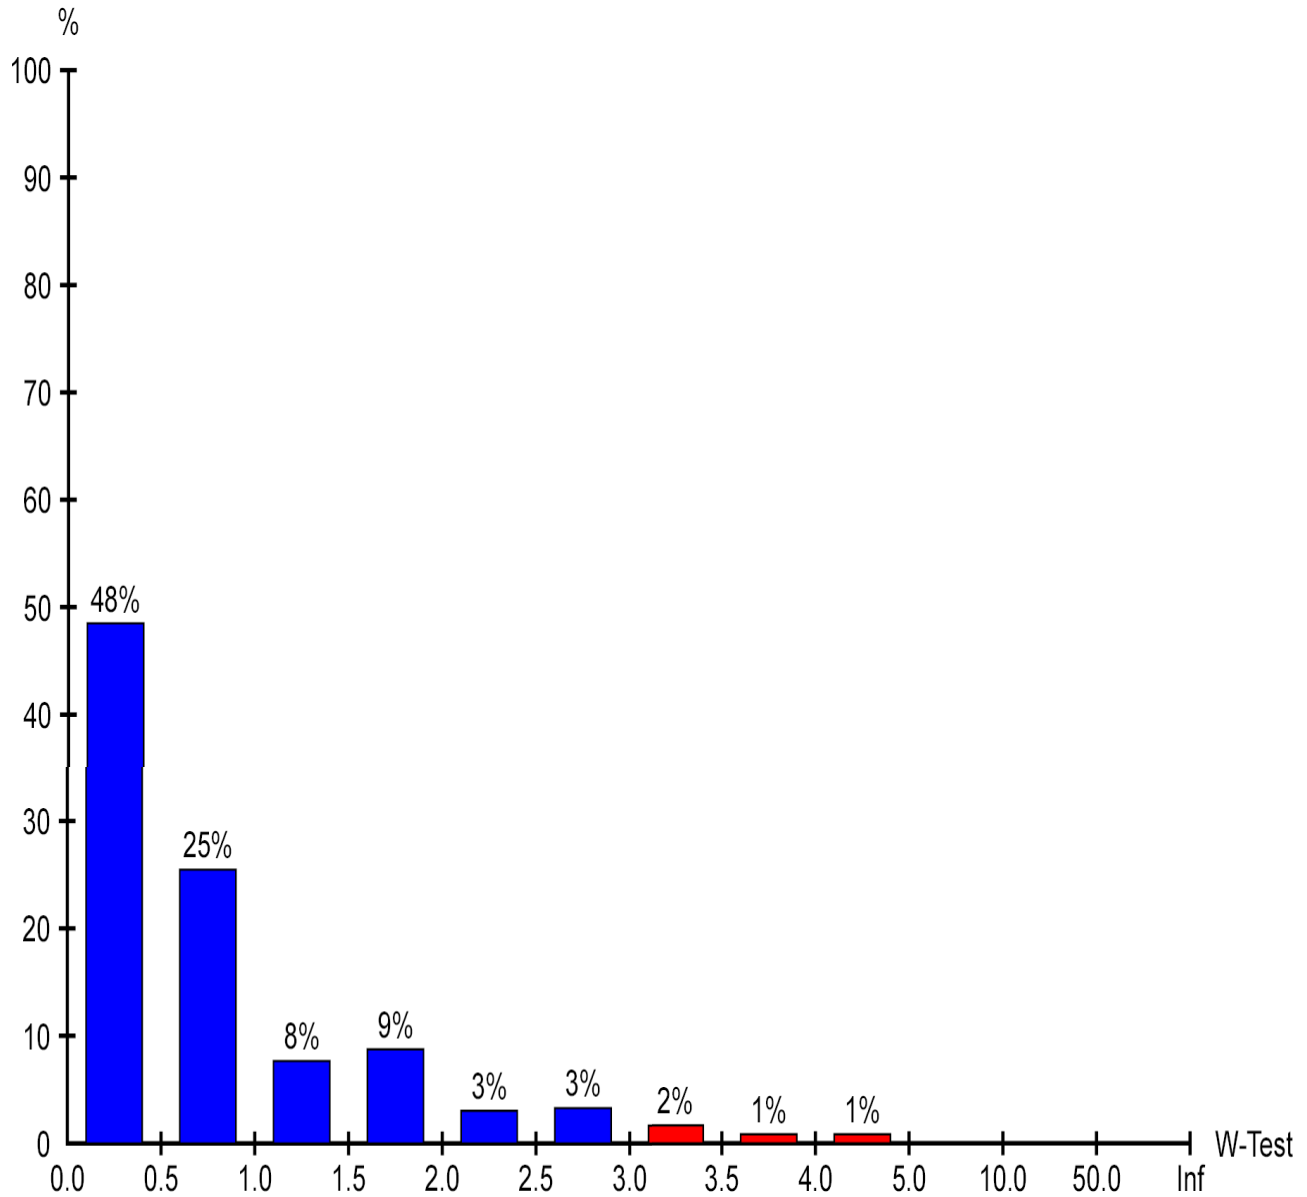

W-Test (< 2.58): 94.5% (345)

W-Test (> 2.58): 5.5% (20)

**T-Test (2-dimensional):**



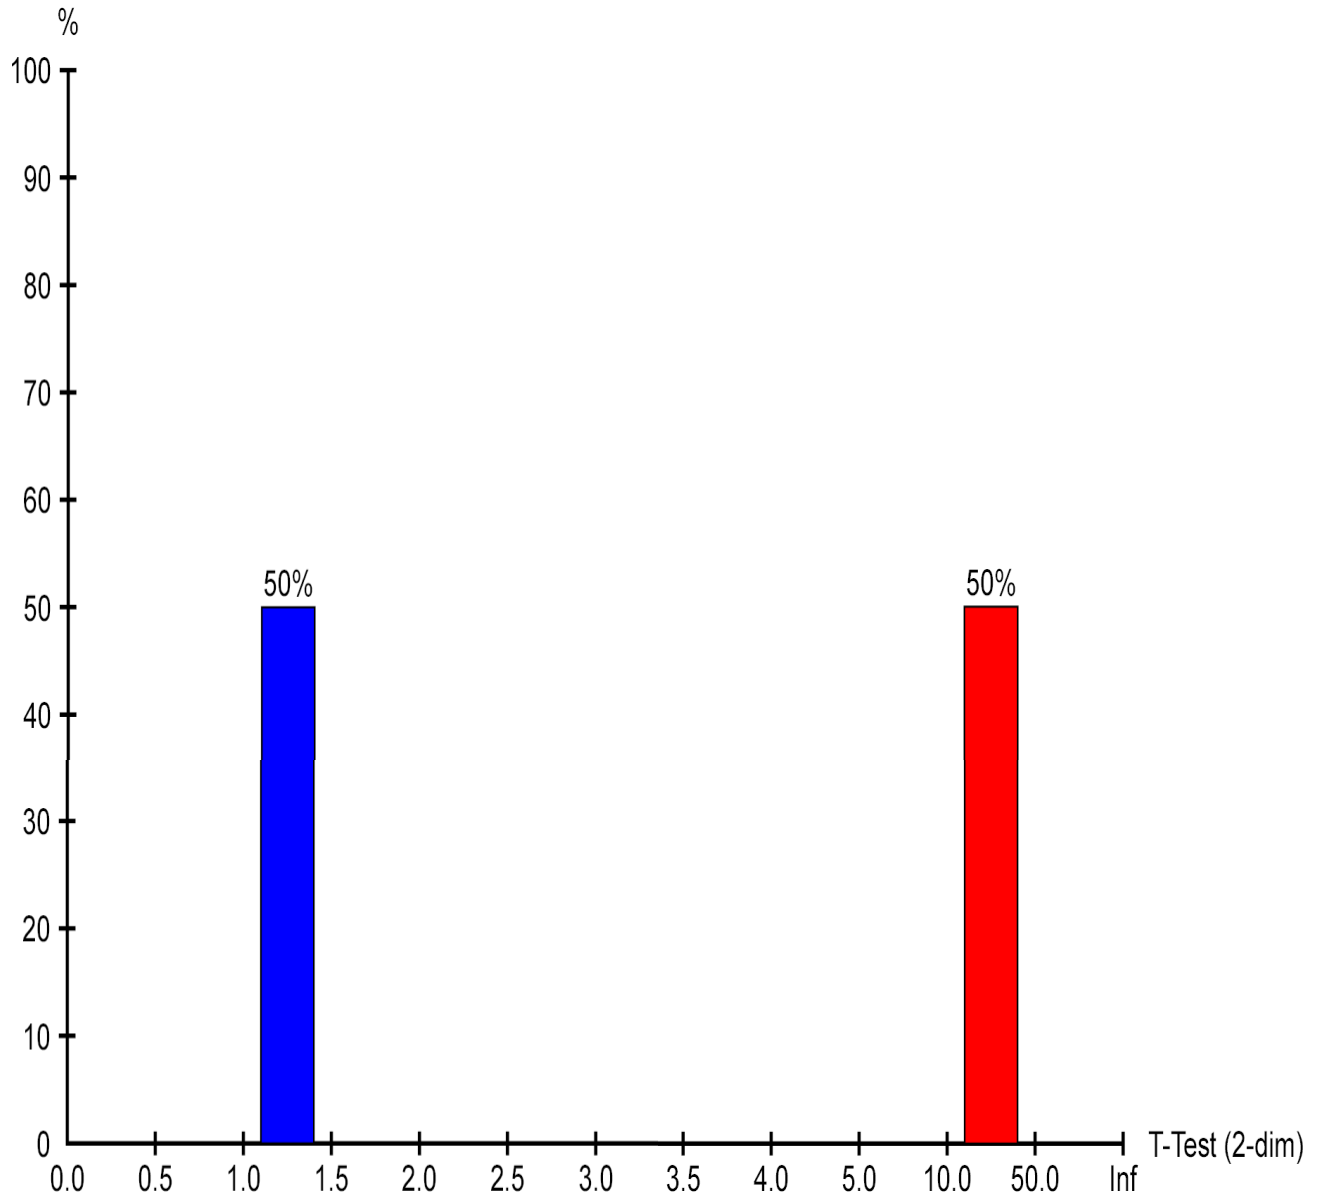

T-Test (2-dim) (< 3.81): 50.0% (1)

T-Test (2-dim) (> 3.81): 50.0% (1)

**T-Test (3-dimensional):**

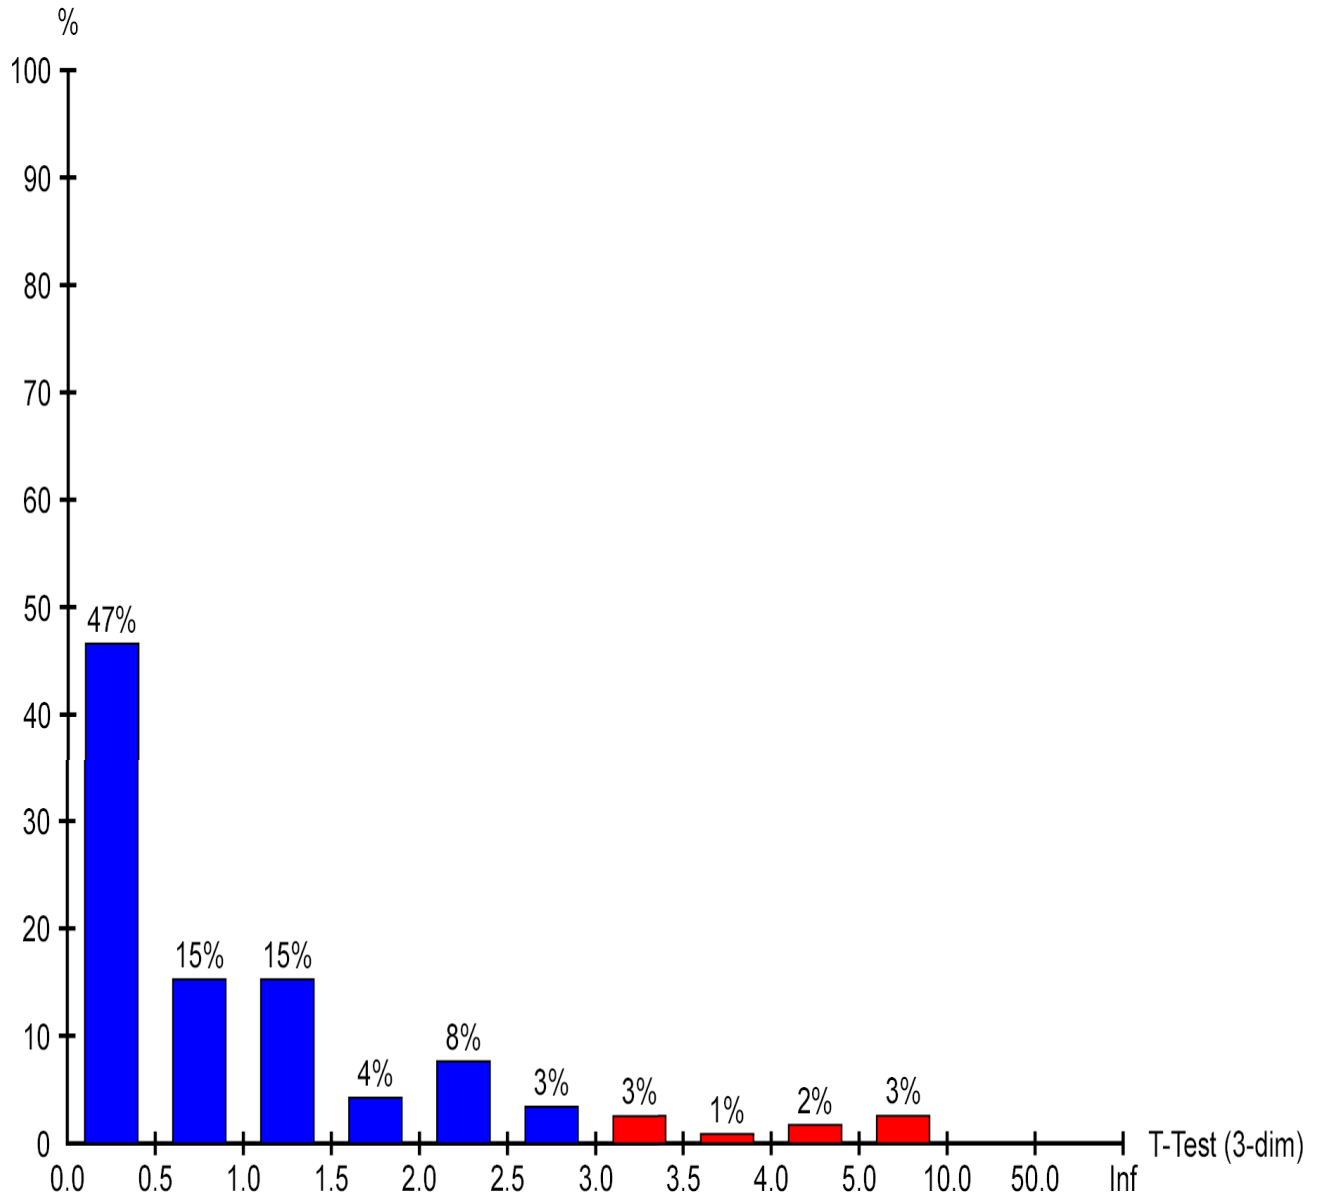

T-Test (3-dim) (< 2.83): 92.4% (109)

T-Test (3-dim) (> 2.83): 7.6% (9)

### Estimated Errors (Coordinates)

#### Estimated Errors For Coordinates With Rejected W-Tests (max 10)

| Station |           | W-Test | Fact | Est err      |
|---------|-----------|--------|------|--------------|
| 707     | Longitude | 4.37   | 1.7  | 0.02671 fts  |
| 702     | Height    | 4.32   | 1.7  | 0.02679 fts  |
| 707     | Latitude  | 3.80   | 1.5  | 0.02371 fts  |
| 708     | Latitude  | -3.56  | 1.4  | -0.01484 fts |

#### Estimated Errors For Stations With Rejected T-Tests (max 10)

| Station |           | T-Test | Fact | Est err      |
|---------|-----------|--------|------|--------------|
| 702     | Latitude  | 7.61   | 1.6  | 0.01058 fts  |
|         | Longitude |        |      | -0.00552 fts |
|         | Height    |        |      | 0.02732 fts  |
| 707     | Latitude  | 16.92  | 2.1  | 0.02394 fts  |
|         | Longitude |        |      | 0.02690 fts  |
|         | Height    |        |      | 0.00000 fts  |
| 708     | Latitude  | 8.14   | 1.7  | -0.01526 fts |
|         | Longitude |        |      | -0.01005 fts |
|         | Height    |        |      | -0.01460 fts |

### Estimated Errors (Observations)

#### Estimated Errors For Observations With Rejected W-Tests (max 10)

|    | Station | Target | W-Test | Fact | Est err      |
|----|---------|--------|--------|------|--------------|
| DZ | 552     | 402    | -3.85  | 1.5  | -0.10699 fts |
| DZ | 702     | 729    | 3.48   | 1.4  | 0.09513 fts  |
| DZ | 729     | 709    | -3.24  | 1.3  | -0.07118 fts |
| DX | 708     | 707    | -3.17  | 1.2  | -0.03237 fts |
| DX | 1       | 707    | -3.03  | 1.2  | -0.03866 fts |
| DZ | 702     | 709    | 2.71   | 1.1  | 0.05923 fts  |
| DZ | 729     | 741    | 2.66   | 1.0  | 0.08972 fts  |
| DZ | 1       | 702    | -2.62  | 1.0  | -0.06816 fts |
| DZ | 551     | 403    | -2.59  | 1.0  | -0.06590 fts |

#### Estimated Errors For Observations With Rejected Antenna Hgt W-Tests (max 10)

| Station | Target | W-Test | Fact | MDB [fts] | Est ant err [fts] |
|---------|--------|--------|------|-----------|-------------------|
| 729     | 741    | 3.05   | 1.2  | 0.11455   | 0.10222           |
| 729     | 709    | -2.74  | 1.1  | 0.07459   | -0.05975          |
| 702     | 729    | 3.24   | 1.3  | 0.09297   | 0.08828           |
| 702     | 709    | 2.85   | 1.1  | 0.07419   | 0.06199           |
| 551     | 403    | -2.84  | 1.1  | 0.08645   | -0.07186          |
| 709     | 401    | -2.67  | 1.0  | 0.08871   | -0.06921          |
| 552     | 402    | -4.17  | 1.6  | 0.09452   | -0.11550          |

#### Estimated Errors For Observations With Rejected T-Tests (max 10)

|    | Station | Target | T-Test | Fact | Est err      |
|----|---------|--------|--------|------|--------------|
| DX | 552     | 402    | 5.86   | 1.4  | 0.04180 fts  |
| DY |         |        |        |      | 0.01636 fts  |
| DZ |         |        |        |      | -0.10704 fts |
| DX | 702     | 729    | 4.21   | 1.2  | 0.00374 fts  |
| DY |         |        |        |      | -0.01832 fts |
| DZ |         |        |        |      | 0.09513 fts  |
| DX | 708     | 707    | 4.15   | 1.2  | -0.03037 fts |
| DY |         |        |        |      | 0.00081 fts  |
| DZ |         |        |        |      | -0.02048 fts |
| DX | 729     | 709    | 3.61   | 1.1  | -0.01219 fts |
| DY |         |        |        |      | 0.00400 fts  |
| DZ |         |        |        |      | -0.07118 fts |
| DX | 1       | 402    | 3.42   | 1.1  | -0.02467 fts |

|    |     |     |      |     |              |
|----|-----|-----|------|-----|--------------|
| DY |     |     |      |     | 0.02181 fts  |
| DZ |     |     |      |     | 0.02142 fts  |
| DX | 1   | 707 | 3.38 | 1.1 | -0.03791 fts |
| DY |     |     |      |     | 0.00938 fts  |
| DZ |     |     |      |     | -0.00982 fts |
| DX | 729 | 741 | 3.35 | 1.1 | -0.02604 fts |
| DY |     |     |      |     | -0.05003 fts |
| DZ |     |     |      |     | 0.08973 fts  |
