# Supplementary material for: High-resolution prediction of American red squirrel in Interior Alaska: a role model for conservation using open access data, machine learning, GIS and LIDAR
Source: PeerJ. 2021 Sep 14;9:e11830. doi: 10.7717/peerj.11830 (PMC8447940; doi:10.7717/peerj.11830)
Supplement: Supplemental Information 2 — The extracted local values from the predictor layers for each point of the lattice grid later used to calculate the RIO-prediction. [file peerj-09-11830-s002.xlsx]

## Sheet: lattice2
Distance_dogtrails	distance_lake	distance_highway	distance_trails	distance_buildings	elevation	slope	aspect	canopy_density	canopy_height	Xcord	Ycord
407.7	27	417.1	7.7	418.1	150.3	4	319	0	0.16	459053	7.19365e+06
403.3	21.8	406.7	7.7	413.6	150.5	8	343	0.57	10.18	459048	7.19365e+06
406.6	27.7	415.9	4.9	416.7	150.5	6	343	0.85	9.02	459053	7.19365e+06
413.1	33.5	420.5	3.4	423.1	150.8	2	283	0	0.08	459058	7.19365e+06
394.5	20.1	401	7.7	404.5	150.4	7	27	0.2	1.73	459043	7.19364e+06
401	22.8	405.6	3.4	410.9	151	7	305	0.68	9.4	459048	7.19364e+06
404.3	28.5	414.6	0	414	150.9	5	145	0.47	3.53	459053	7.19364e+06
410.8	34.2	419.1	0	420.4	151	6	13	0.22	4.67	459058	7.19364e+06
414.1	37.1	423.7	0	423.6	151.1	6	345	0.18	6.78	459063	7.19364e+06
393.4	21.2	399.6	6.9	403.2	150.8	11	304	0.82	9.63	459043	7.19364e+06
399.9	24.2	404.1	0	409.5	151	6	136	0.13	7.1	459048	7.19364e+06
403.2	30.1	413.2	0	412.7	151.2	4	307	0.55	11.57	459053	7.19364e+06
409.7	36.1	417.7	3.4	419.1	151.4	0	72	0.22	5.74	459058	7.19364e+06
413	39	422.3	3.4	422.3	151.4	6	307	0.72	8.79	459063	7.19364e+06
419.6	44.6	426.8	0	428.7	151.3	6	44	0.38	10.5	459068	7.19364e+06
422.8	50.3	431.4	3.4	432	151.2	1	225	0	0.08	459073	7.19364e+06
387.9	17.5	393.6	4.9	397.4	150.5	4	278	0.43	6.87	459038	7.19363e+06
391.2	22.8	398.2	3.4	400.6	150.8	9	157	0.7	12.79	459043	7.19363e+06
397.8	25.6	402.7	0	407	151	13	299	0.84	7.48	459048	7.19363e+06
401.1	31.3	411.8	3.4	410.2	151.3	4	309	0.77	10.32	459053	7.19363e+06
407.6	37.1	416.3	7.7	416.6	151.6	5	315	0.71	7.92	459058	7.19363e+06
410.9	40	420.9	7.7	419.8	151.6	10	335	0.5	7.88	459063	7.19363e+06
417.5	45.9	425.5	3.4	426.3	151.8	6	22	0.6	7.55	459068	7.19363e+06
420.8	51.8	430	0	429.5	151.4	15	42	0.48	3.57	459073	7.19363e+06
380.3	15	387.7	7.7	389.7	150.4	7	180	0.55	11.36	459033	7.19363e+06
386.9	19.2	392.2	3.4	396.1	150.8	7	190	0.69	10.4	459038	7.19363e+06
390.2	24.2	396.8	0	399.3	150.7	10	296	0.09	4.93	459043	7.19363e+06
396.7	26.8	401.3	3.4	405.7	151.3	3	317	0.55	7.5	459048	7.19363e+06
400	32.3	410.4	4.9	409	151.5	3	271	0.62	7.84	459053	7.19363e+06
406.6	37.9	415	9.7	415.4	151.9	2	297	0.79	6.95	459058	7.19363e+06
409.9	40.8	419.6	9.7	418.6	152	7	324	0.45	7.01	459063	7.19363e+06
416.5	46.6	424.2	3.4	425.1	152.4	6	330	0.76	7.09	459068	7.19363e+06
419.8	52.4	428.7	0	428.4	152.4	14	39	0.47	3.65	459073	7.19363e+06
378.2	15	386.3	3.4	387.2	150.4	6	314	0.68	6.91	459033	7.19362e+06
384.8	21	390.9	0	393.6	150.3	6	316	0.06	3.8	459038	7.19362e+06
388.1	27	395.4	3.4	396.9	151.5	5	312	0.75	9.22	459043	7.19362e+06
394.8	30	400	7.7	403.3	151.4	4	287	0.51	9.21	459048	7.19362e+06
398.1	35	409.2	9.7	406.6	151.8	6	240	0.35	4.55	459053	7.19362e+06
404.7	40.2	413.7	14.2	413.1	152	5	302	0.77	17.02	459058	7.19362e+06
408	43	418.3	10.9	416.3	152.4	6	269	0.7	11.39	459063	7.19362e+06
414.6	48.5	422.9	4.9	422.8	152.8	5	305	0.33	8.75	459068	7.19362e+06
418	54.1	427.5	3.4	426.1	153	5	104	0.82	9.98	459073	7.19362e+06
217.6	19	216.3	64.4	232.3	149.5	0	0	0.39	1.55	458858	7.19362e+06
373.9	13.4	380.4	4.9	382.7	150.7	13	131	0.67	13.47	459028	7.19362e+06
377.3	16.2	385	3.4	386	150.4	2	178	0.04	2.85	459033	7.19362e+06
383.9	21.8	389.6	0	392.4	150.9	8	301	0.81	12.23	459038	7.19362e+06
387.2	27.7	394.1	3.4	395.7	151.5	3	307	0.52	4.88	459043	7.19362e+06
393.8	30.6	398.7	9.7	402.2	151.7	3	358	0.72	5.77	459048	7.19362e+06
397.1	36.5	407.9	12.4	405.4	151.9	3	336	0.68	8.23	459053	7.19362e+06
403.8	42.4	412.5	15.4	411.9	152.4	7	306	0.84	11.25	459058	7.19362e+06
407.1	45.4	417.1	12.4	415.2	152.8	8	327	0.49	7.76	459063	7.19362e+06
413.7	51	421.7	6.9	421.7	152.9	1	100	0.6	13.26	459068	7.19362e+06
417.1	56.4	426.3	3.4	425	152.9	1	62	0.58	13.98	459073	7.19362e+06
205.2	24.2	205.8	55.6	219.9	150.5	20	33	0.22	3.86	458848	7.19361e+06
208.2	24.2	210.3	56.1	222.7	150.1	15	62	0.87	9.67	458853	7.19361e+06
214.3	21	214.8	57.8	228.4	149.5	2	247	0.24	0.81	458858	7.19361e+06
372	15	379.1	0	380.4	150.2	1	119	0.39	4.25	459028	7.19361e+06
375.4	17.5	383.7	0	383.6	150.7	16	299	0.69	13.31	459033	7.19361e+06
382	22.8	388.3	3.4	390.1	151.4	10	302	0.72	9.32	459038	7.19361e+06
385.3	28.5	392.9	6.9	393.4	151.9	4	32	0.37	2.87	459043	7.19361e+06
392	31.3	397.5	12.4	399.9	152.1	1	331	0.24	4.34	459048	7.19361e+06
395.3	37.1	406.7	15.4	403.2	152.1	5	323	0.77	14.84	459053	7.19361e+06
402	43	411.3	17.2	409.7	152.4	6	285	0.6	10.79	459058	7.19361e+06
405.3	45.9	415.9	13.8	413	152.9	3	234	0.72	11.46	459063	7.19361e+06
411.9	51.8	420.5	6.9	419.6	153	3	317	0.7	11.79	459068	7.19361e+06
415.2	57.7	425.1	3.4	422.8	153.2	4	320	0.92	19	459073	7.19361e+06
194.5	25.6	195.3	51.2	209.5	150.6	5	335	0.15	1.6	458838	7.19361e+06
197.5	28.3	199.8	51.7	212.3	150.7	2	166	0.2	1.26	458843	7.19361e+06
203.5	30	204.3	52.1	217.9	150.5	8	157	0.45	4.03	458848	7.19361e+06
206.5	27	208.9	52.7	220.8	150.3	2	178	0.04	0.18	458853	7.19361e+06
212.7	21	213.4	54.5	226.5	149.7	15	41	0.18	1.9	458858	7.19361e+06
215.7	15	222.5	55.7	229.4	149.5	3	193	0	0.44	458863	7.19361e+06
367.8	15	373.3	3.4	376	150.3	5	118	0.82	14.63	459023	7.19361e+06
371.1	19.2	377.9	0	379.2	150.4	10	302	0.31	15.77	459028	7.19361e+06
374.5	21.2	382.5	0	382.5	151.3	9	295	0.51	4.63	459033	7.19361e+06
381.1	25.8	387.1	4.9	389	151.6	5	264	0.68	12.8	459038	7.19361e+06
384.5	30.9	391.7	7.7	392.3	151.9	4	312	0.7	13.29	459043	7.19361e+06
391.1	33.5	396.3	14.2	398.8	152.3	6	290	0.58	8.8	459048	7.19361e+06
394.5	39	405.6	17.2	402.1	152.5	4	323	0.21	5.12	459053	7.19361e+06
401.1	44.6	410.1	17.2	408.7	152.7	6	322	0.65	14.31	459058	7.19361e+06
404.3	47.4	414.6	13.8	411.9	153	6	310	0.73	9.39	459063	7.19361e+06
410.9	53.2	419.1	6.9	418.4	153.1	6	331	0.31	2.87	459068	7.19361e+06
414.2	58.9	423.7	3.4	421.7	153.4	3	358	0.49	4.62	459073	7.19361e+06
417.5	61.8	428.2	0	425	153.4	2	307	0	0.07	459078	7.19361e+06
516.9	159.5	524.2	91	524.1	158.6	2	315	0.03	1.4	459178	7.19361e+06
520.2	162.4	528.8	94.1	527.4	158.7	4	298	0	2.37	459183	7.19361e+06
186.8	30.6	189.3	46	201.9	150.5	5	17	0.79	10.06	458833	7.1936e+06
192.8	31.3	193.8	48	207.5	150.6	5	174	0.7	6.75	458838	7.1936e+06
195.8	33.5	198.4	48.2	210.3	150.4	4	54	0.75	4.52	458843	7.1936e+06
201.9	30.6	202.9	48.7	216	150.4	2	302	0.55	2.99	458848	7.1936e+06
205	27.7	207.5	49.3	218.9	150.5	5	348	0.88	7.13	458853	7.1936e+06
211.1	21.8	212.1	51.2	224.6	149.8	16	110	0.91	5.43	458858	7.1936e+06
214.2	16.2	221.2	52.5	227.6	149.5	0	-1	0.88	9.57	458863	7.1936e+06
360.3	17.5	367.5	6.9	368.3	150.3	3	191	0.19	10.14	459018	7.1936e+06
366.9	20.1	372.1	0	374.9	150.4	9	305	0.65	15.23	459023	7.1936e+06
370.2	23.4	376.8	0	378.1	150.9	9	325	0.78	13.44	459028	7.1936e+06
373.6	25.5	381.4	3.4	381.4	151.4	9	318	0.9	17.67	459033	7.1936e+06
380.3	29.7	386	7.7	387.9	151.8	8	286	0.67	13.8	459038	7.1936e+06
383.6	34.2	390.6	9.7	391.2	152.2	6	347	0.8	13.53	459043	7.1936e+06
390.2	36.6	395.1	15.4	397.8	152.4	5	334	0.64	10.15	459048	7.1936e+06
393.4	41.7	404.1	18.6	401	152.7	3	295	0.85	10.16	459053	7.1936e+06
400	47	408.7	17.2	407.5	153	2	339	0.76	5.72	459058	7.1936e+06
403.3	49.7	413.2	13.8	410.8	153.4	4	306	0.63	2.51	459063	7.1936e+06
409.9	55.2	417.7	6.9	417.3	153.4	3	297	0.63	7.76	459068	7.1936e+06
413.2	60.7	422.3	3.4	420.6	153.5	3	92	0.59	10.99	459073	7.1936e+06
416.5	63.6	426.8	0	423.9	153.5	1	193	0	0.09	459078	7.1936e+06
509.3	155	518.3	83.3	516.5	158.6	3	295	0	0.17	459173	7.1936e+06
515.9	160.8	522.9	89.4	523.2	158.8	3	337	0	0.09	459178	7.1936e+06
519.2	163.7	527.4	92.5	526.4	159	4	304	0	0.15	459183	7.1936e+06
522.6	169.5	531.9	95.6	529.7	159.4	3	295	0	0.19	459188	7.1936e+06
174.4	28.3	178.8	37.9	189.5	150.9	8	320	0.49	4.49	458823	7.1936e+06
180.4	31.9	183.4	38.5	195.1	150.9	11	157	0.11	1.61	458828	7.1936e+06
183.4	33.5	187.9	39.3	197.9	150.3	1	180	0.33	6.73	458833	7.1936e+06
189.6	34.2	192.5	41.4	203.6	150.4	2	235	0.67	4.27	458838	7.1936e+06
192.6	36.2	197.1	41.4	206.4	150.5	10	321	0.64	5.3	458843	7.1936e+06
198.8	31.3	201.7	41.9	212.2	150.8	9	326	0.34	3.39	458848	7.1936e+06
201.9	28.5	206.3	42.6	215.1	150.5	11	70	0.67	7.4	458853	7.1936e+06
208.2	22.8	210.8	44.8	221	149.7	14	324	0.61	3.87	458858	7.1936e+06
211.3	17.5	220.1	46.2	224	150.1	16	23	1	9.67	458863	7.1936e+06
217.6	15	224.7	49.7	229.9	149.8	13	31	1	7.07	458868	7.1936e+06
355.2	19	361.8	3.4	362.9	150.7	9	120	0.64	8.23	459013	7.1936e+06
358.5	20.1	366.4	3.4	366.1	150.2	5	129	0.21	4.5	459018	7.1936e+06
365.1	22.8	371	0	372.7	150.9	7	324	0.75	13.83	459023	7.1936e+06
368.4	25.8	375.6	3.4	376	151.4	12	346	0.64	15.29	459028	7.1936e+06
371.7	27.7	380.1	4.9	379.2	151.6	4	307	0.78	14.98	459033	7.1936e+06
378.2	31.9	384.6	10.9	385.7	152	8	293	0.66	13.33	459038	7.1936e+06
381.5	36.1	389.1	14.2	389	152.6	5	323	0.67	9.59	459043	7.1936e+06
388.1	38.4	393.6	19.5	395.6	152.8	6	342	0.23	5.96	459048	7.1936e+06
391.4	43.3	402.7	22.1	398.8	153.2	8	313	0.46	12.42	459053	7.1936e+06
398.1	48.4	407.2	17.2	405.4	153.2	2	247	0.52	5.65	459058	7.1936e+06
401.4	51	411.8	13.8	408.7	153.6	6	249	0.85	5.96	459063	7.1936e+06
408	56.4	416.3	6.9	415.2	153.6	5	335	0.86	10.87	459068	7.1936e+06
411.3	61.8	420.9	3.4	418.5	153.6	4	65	0	0.18	459073	7.1936e+06
414.6	64.6	425.5	0	421.8	153.5	4	270	0	0.14	459078	7.1936e+06
497.5	147.1	507.8	71	504.7	158	4	288	0	0.13	459163	7.1936e+06
504.1	150	512.4	77.1	511.3	158.4	5	297	0	0.24	459168	7.1936e+06
507.4	155.8	516.9	80.1	514.5	158.8	3	273	0	0.11	459173	7.1936e+06
514.1	161.6	521.5	86.4	521.2	158.9	3	327	0	0.1	459178	7.1936e+06
517.4	164.5	526	89.6	524.5	159.1	4	297	0	0.15	459183	7.1936e+06
520.7	170.3	530.5	92.8	527.8	159.5	5	299	0	0.16	459188	7.1936e+06
166.7	30.6	167.1	34.5	181.9	150.4	8	302	0.2	2.4	458813	7.19359e+06
169.7	32.3	171.7	34.5	184.7	150.7	6	162	0.24	3.5	458818	7.19359e+06
172.7	33.5	176.3	34.5	187.5	150.5	10	146	0.3	3.71	458823	7.19359e+06
178.8	36.6	180.9	35.1	193.1	150.4	3	191	0.22	2.86	458828	7.19359e+06
181.8	39.5	185.5	36	195.9	150.3	1	32	0.17	3.65	458833	7.19359e+06
188	40	190.1	37.9	201.7	150.7	8	294	0.74	4.11	458838	7.19359e+06
191.1	37.1	194.8	37.9	204.6	150.9	7	82	0.73	6.28	458843	7.19359e+06
197.3	31.3	199.4	38.5	210.4	150.8	7	226	0.66	10.53	458848	7.19359e+06
200.5	28.5	204.1	39.3	213.3	150.7	4	118	0.71	12.81	458853	7.19359e+06
206.8	22.8	208.7	41.6	219.3	150.7	7	296	0.9	11.06	458858	7.19359e+06
209.9	17.5	218	43.2	222.3	150.8	3	9	0.69	10.51	458863	7.19359e+06
216.3	15	222.4	46.9	228.3	150.7	8	53	0.66	7.68	458868	7.19359e+06
219.5	10.8	226.9	49	231.3	149.6	6	55	0.9	7	458873	7.19359e+06
222.7	6	231.4	51.2	234.3	149.5	2	45	0	0.26	458878	7.19359e+06
354.2	23.4	359.1	0	361.8	150.6	3	155	0.05	2.97	459013	7.19359e+06
357.5	25.5	363.6	0	365.1	151	12	324	0.94	13.73	459018	7.19359e+06
364.1	28.3	368.1	0	371.6	151.7	9	304	0.59	9.28	459023	7.19359e+06
367.3	30.9	372.7	3.4	374.9	152	6	330	0.69	8.48	459028	7.19359e+06
370.6	32.5	377.2	6.9	378.1	152.1	7	6	0.76	14.19	459033	7.19359e+06
377.3	36.1	381.8	12.4	384.7	152.1	7	304	0.65	12.34	459038	7.19359e+06
380.6	40.4	386.3	15.4	387.9	153.1	6	257	0.93	19.05	459043	7.19359e+06
387.2	42.4	390.9	21.8	394.5	153	2	335	0.64	14.4	459048	7.19359e+06
390.5	46.9	400	24.1	397.8	153.2	5	306	0.66	11.02	459053	7.19359e+06
397.1	51.6	404.6	17.2	404.3	153.5	4	326	0.7	9.88	459058	7.19359e+06
400.4	54.1	409.2	13.8	407.6	153.7	6	335	0.52	17	459063	7.19359e+06
407.1	59.2	413.7	6.9	414.2	154	2	4	0.83	14.27	459068	7.19359e+06
410.4	64.4	418.3	3.4	417.5	154	3	29	0.62	12.99	459073	7.19359e+06
413.7	67.1	422.9	0	420.8	153.5	3	315	0	0.16	459078	7.19359e+06
486.6	137.6	496	60.2	493.8	157.4	6	317	0	0.22	459153	7.19359e+06
493.2	143.3	500.5	66.3	500.4	157.8	4	288	0	0.12	459158	7.19359e+06
496.5	148.9	505.1	69.3	503.7	158.1	5	284	0	0.18	459163	7.19359e+06
503.2	151.8	509.6	75.6	510.3	158.5	4	284	0	0.12	459168	7.19359e+06
506.5	157.5	514.2	78.7	513.6	158.8	3	287	0	0.12	459173	7.19359e+06
513.2	163.2	518.8	85.1	520.2	159	5	302	0	0.17	459178	7.19359e+06
516.5	166.1	523.2	88.3	523.5	159.4	4	298	0	0.14	459183	7.19359e+06
519.9	171.8	527.6	91.6	526.8	159.6	7	275	0	0.2	459188	7.19359e+06
154.3	36.1	156.7	29.4	169.5	150.4	2	295	0.44	3.04	458803	7.19359e+06
157.3	36	161.3	28.4	172.3	150.6	7	287	0.57	4.16	458808	7.19359e+06
163.4	36.5	165.9	27.6	177.9	150.3	6	144	0.33	3.07	458813	7.19359e+06
166.4	37.9	170.6	27.6	180.7	150.3	1	14	0.04	0.23	458818	7.19359e+06
169.5	39	175.2	27.6	183.5	150.5	4	226	0.37	3.27	458823	7.19359e+06
175.7	41.7	179.8	28.4	189.2	150.6	3	354	0.78	5.43	458828	7.19359e+06
178.8	45	184.5	29.4	192.1	150.8	6	332	0.65	11.15	458833	7.19359e+06
185.1	42.1	189.1	31	198	150.8	2	255	0.68	12.33	458838	7.19359e+06
188.2	36.1	193.8	31	200.9	150.9	1	139	0.79	12.55	458843	7.19359e+06
194.6	30.1	198.4	31.8	206.9	150.9	4	162	0.71	11.11	458848	7.19359e+06
197.7	27.2	202.9	32.7	209.9	150.6	4	75	0.13	5.16	458853	7.19359e+06
204.1	21.2	207.4	35.5	215.9	150.7	2	241	0.2	0.27	458858	7.19359e+06
207.3	15.3	216.3	37.3	218.9	150.8	1	94	0.59	6.57	458863	7.19359e+06
213.8	12.4	220.8	41.5	225	150.8	2	85	0.7	7.22	458868	7.19359e+06
217	6.7	225.3	43.9	228.1	149.8	17	100	0.8	7.35	458873	7.19359e+06
345.6	25.5	353.1	3.4	353.1	150.5	5	307	0.6	8.08	459008	7.19359e+06
352.2	28.3	357.6	0	359.6	150.9	10	298	0.23	7.44	459013	7.19359e+06
355.5	30	362.2	3.4	362.9	151.8	7	315	0.83	11.65	459018	7.19359e+06
362.1	33.5	366.7	4.9	369.4	152.2	7	320	0.74	7.22	459023	7.19359e+06
365.4	36.2	371.3	7.7	372.7	152.4	4	354	0.48	7.96	459028	7.19359e+06
368.7	37.6	375.9	9.7	376	152.5	7	324	0.64	11.9	459033	7.19359e+06
375.4	40.8	380.4	15.4	382.5	152.5	7	37	0.37	8.59	459038	7.19359e+06
378.7	44.6	385	18.6	385.8	152.9	5	321	0.68	11.36	459043	7.19359e+06
385.3	46.7	389.6	24.8	392.4	153.1	5	287	0.81	15.71	459048	7.19359e+06
388.7	50.9	398.7	25.1	395.7	153.5	7	314	0.79	15.07	459053	7.19359e+06
395.3	55.3	403.3	18.6	402.3	153.7	3	309	0.69	3.59	459058	7.19359e+06
398.7	57.6	407.9	15.4	405.6	154	5	280	0.68	6.77	459063	7.19359e+06
405.3	62.4	412.5	9.7	412.3	154.3	4	164	0.48	6.1	459068	7.19359e+06
408.7	67.4	417.1	6.9	415.6	154.2	6	17	0.66	17.64	459073	7.19359e+06
411.9	70	421.7	3.4	418.9	153.6	3	48	0.05	0.38	459078	7.19359e+06
418.5	75.2	426.3	0	425.5	153.7	3	293	0	0.26	459083	7.19359e+06
474.8	131	481	47.9	481.9	157.1	2	348	0	0.13	459143	7.19359e+06
481.4	136.8	485.5	53.9	488.5	157.4	7	315	0	0.32	459148	7.19359e+06
484.8	139.7	494.6	57	491.8	157.8	6	316	0	0.24	459153	7.19359e+06
491.4	145.4	499.2	63.4	498.4	158.1	6	323	0	0.2	459158	7.19359e+06
494.8	151	503.8	66.6	501.7	158.4	5	322	0	0.22	459163	7.19359e+06
501.4	153.8	508.2	73	508.4	158.7	6	317	0	0.18	459168	7.19359e+06
504.7	159.4	512.6	76.3	511.7	158.9	5	320	0	0.17	459173	7.19359e+06
511.3	165.1	517.1	82.8	518.3	159.2	3	294	0	0.17	459178	7.19359e+06
514.5	167.9	521.5	86.1	521.5	159.5	5	310	0	0.08	459183	7.19359e+06
517.9	173.6	526	89.5	524.7	159.8	4	307	0	0.2	459188	7.19359e+06
524.5	179.3	530.5	96.1	531.2	160.2	4	286	0	0.15	459193	7.19359e+06
146.6	40	151	27.8	162	150.8	2	294	0.55	4.15	458798	7.19358e+06
152.6	39.1	155.6	26.2	167.5	150.7	2	124	0.38	4.38	458803	7.19358e+06
155.7	39	160.3	25.1	170.2	150.5	6	139	0.4	3.88	458808	7.19358e+06
161.8	39.5	164.9	24.1	175.9	150.4	1	157	0.03	1.63	458813	7.19358e+06
164.9	40.8	169.6	24.1	178.7	150.5	3	274	0.32	3.31	458818	7.19358e+06
168	41.8	174.2	24.1	181.6	150.7	2	349	0.38	4.18	458823	7.19358e+06
174.2	44.3	178.9	25.1	187.4	150.6	2	29	0.83	4.65	458828	7.19358e+06
177.4	45	183.5	26.2	190.3	151	6	212	0.79	14.08	458833	7.19358e+06
183.7	42	187.9	27.6	196.2	150.9	3	99	0.7	10.19	458838	7.19358e+06
186.9	36	192.4	27.6	199.2	150.8	0	18	0.49	10.13	458843	7.19358e+06
193.2	30	196.8	28.4	205.2	150.8	1	285	0.67	7.26	458848	7.19358e+06
196.4	27	201.3	29.4	208.2	150.8	4	142	0.77	11.23	458853	7.19358e+06
202.9	21	205.8	32.5	214.3	150.7	3	6	0.67	12	458858	7.19358e+06
206.1	15	214.8	34.5	217.3	150.7	4	15	0.59	6.33	458863	7.19358e+06
212.6	12	219.3	39	223.4	150.8	1	352	0.25	4.8	458868	7.19358e+06
215.8	6	223.9	41.5	226.5	149.7	13	66	0.51	6.57	458873	7.19358e+06
219	0	228.4	43.9	229.6	149.5	0	-1	0.67	4.85	458878	7.19358e+06
341.3	24.2	347.2	3.4	348.7	150.4	7	322	0.13	3.62	459003	7.19358e+06
344.6	27.7	351.7	0	352	150.9	4	80	0.74	8.55	459008	7.19358e+06
351.2	30.9	356.3	3.4	358.5	151.6	17	303	0.57	8.38	459013	7.19358e+06
354.5	32.5	360.9	4.9	361.8	152.1	6	295	0.41	6.15	459018	7.19358e+06
361.2	36.1	365.4	7.7	368.4	152.4	5	265	0.75	9.66	459023	7.19358e+06
364.5	39	370	9.7	371.7	152.7	3	331	0.42	9.35	459028	7.19358e+06
367.8	40.2	374.6	12.4	374.9	152.9	5	310	0.81	9.69	459033	7.19358e+06
374.5	43.3	379.1	17.2	381.5	153	3	345	0.18	4.08	459038	7.19358e+06
377.8	46.9	383.7	20.1	384.8	153.2	4	5	0.78	15.95	459043	7.19358e+06
384.5	48.8	388.3	26.2	391.4	153.3	2	318	0.71	15.76	459048	7.19358e+06
387.8	53.1	397.5	26.2	394.8	153.5	6	219	0.75	12.89	459053	7.19358e+06
394.5	57.3	402.1	20.1	401.4	153.7	6	199	0.58	3.69	459058	7.19358e+06
397.8	59.5	406.7	17.2	404.7	154	3	184	0.59	5.75	459063	7.19358e+06
404.3	64.2	411.3	10.9	411.3	154.2	12	273	0.33	3.6	459068	7.19358e+06
407.6	69.1	415.9	7.7	414.6	154.5	3	182	0.91	18.07	459073	7.19358e+06
410.9	71.6	420.5	4.9	418	154.3	2	360	0.68	15.65	459078	7.19358e+06
417.5	76.7	425.1	0	424.6	154	3	19	0	0.2	459083	7.19358e+06
420.8	81.9	429.7	3.4	428	153.9	4	23	0	0.2	459088	7.19358e+06
470.6	126.2	475.1	43.2	477.6	157	5	301	0	0.25	459138	7.19358e+06
473.9	131.9	479.6	46.2	480.9	157.4	5	297	0	0.31	459143	7.19358e+06
480.6	137.6	484.2	52.5	487.5	157.8	6	329	0	0.27	459148	7.19358e+06
483.9	140.5	493.2	55.7	490.8	158.1	7	315	0	0.18	459153	7.19358e+06
490.5	146.3	497.6	62.1	497.5	158.5	6	321	0	0.22	459158	7.19358e+06
493.8	152.1	502.1	65.4	500.8	158.8	6	330	0	0.2	459163	7.19358e+06
500.4	154.9	506.5	72	507.4	159.1	5	330	0	0.19	459168	7.19358e+06
503.7	160.5	511	75.3	510.6	159.3	5	348	0	0.17	459173	7.19358e+06
510.3	166.1	515.4	81.9	517.1	159.5	5	321	0	0.18	459178	7.19358e+06
513.6	168.9	519.9	85.2	520.3	159.8	4	342	0	0.13	459183	7.19358e+06
516.9	174.6	524.4	88.6	523.5	160	3	310	0	0.12	459188	7.19358e+06
523.5	180.3	528.9	95.3	529.9	160.4	4	296	0	0.13	459193	7.19358e+06
134.2	48	140.7	24.1	149.6	150.5	6	341	0.41	6.94	458788	7.19358e+06
140.3	47.4	145.3	21.8	155.1	150.8	4	72	0.55	4.56	458793	7.19358e+06
143.3	45.9	150	21	157.8	150.5	6	135	0.17	2.33	458798	7.19358e+06
149.5	45.1	154.7	20.1	163.5	150.3	3	203	0.05	1.31	458803	7.19358e+06
152.6	45	159.3	18.6	166.3	150.6	2	317	0.6	4.14	458808	7.19358e+06
158.8	45.4	163.8	17.2	172.1	150.7	5	343	0.76	7.28	458813	7.19358e+06
162	46.6	168.4	17.2	175	150.9	5	331	0.56	3.16	458818	7.19358e+06
165.1	47.4	172.9	17.2	177.9	150.6	1	121	0.82	8.69	458823	7.19358e+06
171.5	49.7	177.4	18.6	183.8	150.7	2	237	0.57	6.19	458828	7.19358e+06
174.7	45	181.8	20.1	186.8	150.8	4	11	0.32	5.6	458833	7.19358e+06
181.1	42	186.3	20.7	192.8	150.8	4	359	0.29	2.56	458838	7.19358e+06
184.3	36	190.8	20.7	195.8	150.8	3	159	0.48	4.79	458843	7.19358e+06
190.8	30	195.3	21.8	201.9	150.8	1	234	0.26	2.55	458848	7.19358e+06
194	27	199.8	23.1	205	150.7	4	51	0.66	5.9	458853	7.19358e+06
200.5	21	204.3	26.9	211.1	150.7	3	337	0.51	6.39	458858	7.19358e+06
203.8	15	213.4	29.2	214.2	150.9	3	225	0.42	7.06	458863	7.19358e+06
210.3	12	218	34.1	220.5	150.7	1	118	0.88	6.62	458868	7.19358e+06
213.6	6	222.5	36.6	223.6	150.8	14	62	0.67	6.46	458873	7.19358e+06
216.9	0	227.1	39	226.7	149.5	6	298	0.86	10.26	458878	7.19358e+06
332.8	19	341.3	9.7	340	150.4	6	168	0.81	6.57	458998	7.19358e+06
339.4	20.1	345.8	3.4	346.6	150.6	9	221	0.41	2.13	459003	7.19358e+06
342.7	23.4	350.4	0	349.9	150.6	7	263	0.06	0.77	459008	7.19358e+06
349.4	27.7	355	4.9	356.5	151.8	11	309	0.63	11.08	459013	7.19358e+06
352.7	29.7	359.6	7.7	359.8	152.2	3	319	0.5	11.1	459018	7.19358e+06
359.4	34.2	364.2	14.2	366.4	152.6	5	294	0.63	12.16	459023	7.19358e+06
362.7	39.1	368.7	15.4	369.7	152.9	3	287	0.39	5.77	459028	7.19358e+06
366.1	41.7	373.3	17.2	373	153	6	264	0.82	18.56	459033	7.19358e+06
372.7	47	377.9	22.1	379.6	153.1	2	215	0.71	18.9	459038	7.19358e+06
376	51.6	382.5	24.4	382.9	153.4	4	290	0.43	5.61	459043	7.19358e+06
382.5	53.4	387.1	29.6	389.6	153.6	3	344	0.43	11.48	459048	7.19358e+06
385.8	57.3	396.3	29.4	392.9	153.7	4	19	0.74	16.88	459053	7.19358e+06
392.4	61.6	401	23.1	399.5	153.6	6	341	0.73	9.81	459058	7.19358e+06
395.7	63.6	405.6	20.1	402.9	153.6	3	165	0.79	5.32	459063	7.19358e+06
402.3	68	410.1	14.2	409.5	153.8	4	325	0.39	3.59	459068	7.19358e+06
405.6	72.6	414.6	10.9	412.9	154.2	3	144	0.35	9.46	459073	7.19358e+06
409	75	419.1	7.7	416.2	154.2	5	177	0.05	1.47	459078	7.19358e+06
415.6	79.9	423.7	3.4	422.8	154.1	2	156	0.54	1.76	459083	7.19358e+06
418.9	84.9	428.2	0	426.1	154.1	3	346	0	0.24	459088	7.19358e+06
458.8	119.8	464.6	30.8	465.7	156.7	5	327	0	0.15	459128	7.19358e+06
462.1	125.4	469.2	33.9	469.1	156.9	7	327	0.03	0.38	459133	7.19358e+06
468.7	128.2	473.7	40.3	475.7	157.3	8	324	0	0.22	459138	7.19358e+06
472	133.8	478.2	43.6	479	157.8	8	323	0	0.26	459143	7.19358e+06
478.6	139.5	482.6	50.2	485.7	158.2	7	326	0	0.24	459148	7.19358e+06
481.9	142.3	491.5	53.5	488.9	158.5	6	329	0	0.22	459153	7.19358e+06
488.5	148	496	60.2	495.3	158.8	5	316	0	0.16	459158	7.19358e+06
491.8	153.7	500.4	63.5	498.5	159.1	5	319	0	0.17	459163	7.19358e+06
498.4	156.6	504.9	70.3	504.9	159.4	5	314	0	0.1	459168	7.19358e+06
501.7	162.4	509.4	73.7	508.2	159.6	5	327	0	0.19	459173	7.19358e+06
508.2	168.1	513.8	80.4	514.6	159.8	2	308	0	0.12	459178	7.19358e+06
511.4	171	518.3	83.8	517.9	160	3	296	0	0.12	459183	7.19358e+06
514.6	176.6	522.8	87.2	521.1	160.2	3	332	0	0.14	459188	7.19358e+06
521.1	182.2	527.3	94.1	527.6	160.5	4	285	0	0.13	459193	7.19358e+06
123.5	55.3	130.4	23.1	139.4	150.6	2	68	0.74	6.47	458778	7.19357e+06
129.5	54.3	135.1	21	144.8	150.5	2	137	0.63	5.2	458783	7.19357e+06
132.6	54	139.7	20.7	147.5	150.5	4	141	0.44	4.28	458788	7.19357e+06
138.7	53.2	144.2	18.6	153	150.3	2	114	0.05	1.74	458793	7.19357e+06
141.8	51.8	148.8	17.6	155.8	150.3	2	250	0.23	2.22	458798	7.19357e+06
148	51.1	153.3	17.2	161.5	150.8	4	290	0.4	6.8	458803	7.19357e+06
151.1	51	157.9	15.4	164.4	150.7	4	182	0.91	11.08	458808	7.19357e+06
157.5	51.4	162.4	13.8	170.2	150.7	5	357	0	0.19	458813	7.19357e+06
160.6	52.4	166.8	13.8	173.2	150.7	1	40	0.05	1.95	458818	7.19357e+06
163.8	53.2	171.3	13.8	176.1	150.8	2	282	0.21	5.96	458823	7.19357e+06
170.2	51.4	175.8	15.4	182.1	150.7	0	45	0.32	5.65	458828	7.19357e+06
173.4	45.4	180.3	17.2	185.1	150.8	3	225	0.69	10.82	458833	7.19357e+06
179.9	42.4	184.8	17.2	191.1	150.9	5	198	0.83	5.48	458838	7.19357e+06
183.1	36.5	189.3	17.2	194.2	150.9	2	112	0.74	6.35	458843	7.19357e+06
189.6	30.6	193.8	18.6	200.3	150.8	2	57	0.51	8.72	458848	7.19357e+06
192.9	27.7	198.4	20.1	203.4	150.9	3	6	0.62	5.51	458853	7.19357e+06
199.4	21.8	202.9	24.4	209.6	151	7	340	0.56	9.85	458858	7.19357e+06
202.7	16.2	212.1	26.9	212.8	150.8	2	152	0.42	2.48	458863	7.19357e+06
209.3	13.4	216.7	31.8	219	150.7	4	100	0.19	2.85	458868	7.19357e+06
212.6	8.5	221.2	34.1	222.2	150.8	1	66	0.79	5.5	458873	7.19357e+06
215.9	6	225.8	36.6	225.3	150.7	18	65	0.44	5.3	458878	7.19357e+06
222.5	6	230.4	41.5	231.7	149.5	2	45	1	9.18	458883	7.19357e+06
338.5	15	344.6	3.4	345.6	149.6	8	254	0.25	5.2	459003	7.19357e+06
341.8	19.2	349.2	0	348.9	151.2	21	287	0.53	17.2	459008	7.19357e+06
348.5	23.4	353.7	6.9	355.5	152.2	5	310	0.75	14.25	459013	7.19357e+06
351.8	25.8	358.3	9.7	358.8	152.5	4	333	0.07	2.16	459018	7.19357e+06
358.5	30.9	362.9	15.4	365.4	152.7	3	307	0.33	8.37	459023	7.19357e+06
361.8	36.2	367.5	18.6	368.7	152.9	4	308	0.16	2.06	459028	7.19357e+06
365.1	39	372.1	20.1	372	153.1	3	1	0.25	4.75	459033	7.19357e+06
371.7	44.6	376.8	24.4	378.7	153.3	5	300	0.68	12.02	459038	7.19357e+06
374.9	50.3	381.4	26.9	382	153.7	1	288	0.21	6.02	459043	7.19357e+06
381.5	53.2	386	31.8	388.7	153.8	5	335	0.44	8	459048	7.19357e+06
384.8	58.9	395.1	30.8	392	154	7	318	0.26	9.48	459053	7.19357e+06
391.4	64.8	399.6	24.8	398.7	154.1	5	61	0.73	8.17	459058	7.19357e+06
394.8	67.7	404.1	21.8	402	153.7	6	65	0.38	7.5	459063	7.19357e+06
401.4	72.1	408.7	15.4	408.7	154	5	220	0.71	8	459068	7.19357e+06
404.7	76.5	413.2	12.4	411.9	153.9	5	301	0.65	9.75	459073	7.19357e+06
408	78.7	417.7	9.7	415.2	153.9	7	288	0.85	6.05	459078	7.19357e+06
414.6	83.4	422.3	4.9	421.8	153.9	4	40	0.39	4.51	459083	7.19357e+06
418	88.2	426.8	3.4	425.1	154.3	6	228	0.54	2.17	459088	7.19357e+06
424.6	90.7	431.4	0	431.7	154.5	6	310	0	0.17	459093	7.19357e+06
428	95.7	435.9	3.4	435	154.7	3	311	0	0.31	459098	7.19357e+06
447.9	114	454.2	20.1	454.9	156.2	4	295	0	0.2	459118	7.19357e+06
454.5	116.7	458.7	26.2	461.5	156.5	5	309	0	0.14	459123	7.19357e+06
457.8	122.2	463.2	29.4	464.8	156.9	6	309	0	0.19	459128	7.19357e+06
461.1	127.6	467.6	32.7	468.1	157.4	7	303	0	0.28	459133	7.19357e+06
467.7	130.4	472	39.3	474.8	157.9	7	311	0	0.21	459138	7.19357e+06
471	135.9	476.5	42.6	478	158.3	5	317	0.05	2.4	459143	7.19357e+06
477.6	141.5	481	49.3	484.4	158.7	5	320	0	0.15	459148	7.19357e+06
480.9	144.3	489.9	52.7	487.6	158.9	6	321	0	0.16	459153	7.19357e+06
487.5	149.9	494.3	59.5	494.1	159.2	6	332	0	0.21	459158	7.19357e+06
490.8	155.6	498.8	62.9	497.3	159.4	4	302	0	0.21	459163	7.19357e+06
497.3	158.4	503.3	69.7	503.7	159.7	4	328	0	0.18	459168	7.19357e+06
500.5	164.1	507.8	73.1	507	160	5	324	0	0.19	459173	7.19357e+06
507	169.8	512.3	79.9	513.4	160.1	4	347	0	0.12	459178	7.19357e+06
510.2	172.7	516.8	83.3	516.7	160.3	4	334	0	0.13	459183	7.19357e+06
513.4	178.4	521.3	86.8	519.9	160.5	3	330	0	0.13	459188	7.19357e+06
519.9	184.2	525.8	93.6	526.4	160.6	4	311	0	0.15	459193	7.19357e+06
523.2	187.1	530.3	97	529.7	161	5	305	0	0.11	459198	7.19357e+06
117.2	58.9	124.7	18.6	132.4	150.8	5	265	0.56	8	458773	7.19357e+06
120.2	58.2	129.2	17.2	135.1	150.5	9	127	0.41	3.62	458778	7.19357e+06
126.4	57.3	133.8	14.2	140.6	150.4	2	216	0.47	3.23	458783	7.19357e+06
129.5	56.9	138.3	13.8	143.4	150.5	3	298	0.26	4.5	458788	7.19357e+06
135.8	56	142.9	12.4	149.1	150.4	4	321	0.49	4.86	458793	7.19357e+06
138.9	54.7	147.3	10.9	152	150.6	9	303	0.59	5.83	458798	7.19357e+06
145.3	54.1	151.8	10.3	157.8	150.8	3	225	0.77	4.87	458803	7.19357e+06
148.5	54	156.3	9.7	160.7	150.8	2	350	0.38	6.98	458808	7.19357e+06
154.9	54.3	160.7	6.9	166.7	150.8	3	239	0.04	1.22	458813	7.19357e+06
158.1	55.3	165.2	6.9	169.7	150.8	2	66	0.73	9.87	458818	7.19357e+06
161.3	56	169.8	6.9	172.7	150.7	1	99	0.41	10.45	458823	7.19357e+06
167.8	51.8	174.3	9.7	178.8	150.8	6	338	0.07	0.62	458828	7.19357e+06
171.1	45.9	178.8	10.3	181.8	150.8	4	222	0.53	7.56	458833	7.19357e+06
177.6	43	183.4	10.3	188	150.9	5	358	0.56	11.49	458838	7.19357e+06
180.9	37.1	187.9	10.3	191.1	150.7	5	295	0.59	11.19	458843	7.19357e+06
187.5	31.3	192.5	12.4	197.3	150.9	2	132	0.18	3.88	458848	7.19357e+06
190.8	28.5	197.1	14.6	200.5	150.9	3	329	0.66	7.19	458853	7.19357e+06
197.4	22.8	201.7	19.5	206.8	150.8	1	241	0.63	5.35	458858	7.19357e+06
200.7	17.5	210.8	22.1	209.9	150.9	5	117	0.6	5.5	458863	7.19357e+06
207.3	15	215.5	26.9	216.3	151	1	349	0.43	4.88	458868	7.19357e+06
210.6	10.8	220.1	29.2	219.5	150.6	3	59	0.03	0.33	458873	7.19357e+06
214	9	224.7	31.8	222.7	150.5	10	32	0.53	1.91	458878	7.19357e+06
220.6	9	229.3	36.6	229.1	149.8	25	40	0.95	7.39	458883	7.19357e+06
224	8.5	233.9	39	232.3	149.5	0	-1	1	2.16	458888	7.19357e+06
330.1	10.8	338.8	6.9	337	149.6	10	301	0.13	5.14	458998	7.19357e+06
336.7	12.7	343.4	0	343.6	150.4	15	328	0.45	7.43	459003	7.19357e+06
340	17	348	0	347	151.7	15	281	0.88	16.83	459008	7.19357e+06
346.6	21.6	352.6	6.9	353.6	152.5	8	231	0.94	9.17	459013	7.19357e+06
349.9	24.2	357.2	10.3	356.9	152.7	4	242	0.53	4.39	459018	7.19357e+06
356.5	29.5	361.8	17.2	363.6	152.9	4	284	0.44	6.8	459023	7.19357e+06
359.8	35.1	366.4	20.7	366.9	153.1	4	281	0.75	9.11	459028	7.19357e+06
363.1	37.9	371	24.1	370.2	153.4	4	293	0.67	9.12	459033	7.19357e+06
369.7	43.7	375.6	29.6	376.9	153.6	4	299	0.59	8.32	459038	7.19357e+06
373	49.5	380.1	31.8	380.3	153.9	5	315	0.31	5.52	459043	7.19357e+06
379.6	52.4	384.6	36.6	386.9	154	3	300	0.48	18.26	459048	7.19357e+06
382.9	58.2	393.6	33.9	390.2	154.3	4	266	0.68	11.27	459053	7.19357e+06
389.6	64.1	398.2	27.8	396.7	154.4	2	339	0.56	3.26	459058	7.19357e+06
392.9	67.1	402.7	24.8	400	153.9	10	78	0.64	11.86	459063	7.19357e+06
399.5	73	407.2	19.5	406.6	153.7	2	275	0.39	5.86	459068	7.19357e+06
402.9	78.5	411.8	17.2	409.9	153.9	8	336	0.59	3.37	459073	7.19357e+06
406.2	80.7	416.3	14.2	413.2	153.8	5	272	0.77	4.82	459078	7.19357e+06
412.9	85.3	420.9	7.7	419.8	154.4	7	340	0.82	5.8	459083	7.19357e+06
416.2	90	425.5	4.9	423.2	154.3	9	322	0.56	2.88	459088	7.19357e+06
422.8	92.4	430	0	429.8	154.7	5	322	0.35	1.7	459093	7.19357e+06
426.1	97.3	434.6	0	433.1	155.1	7	318	0	0.21	459098	7.19357e+06
442.6	110.1	448.2	14.2	449.7	156.2	9	312	0	0.23	459113	7.19357e+06
445.9	115.4	452.6	17.6	453	156.6	5	328	0	0.17	459118	7.19357e+06
452.5	118.1	457	24.4	459.4	156.8	4	309	0	0.09	459123	7.19357e+06
455.8	123.4	461.5	27.8	462.6	157.2	6	283	0	0.26	459128	7.19357e+06
459.1	128.9	465.9	31.2	465.9	157.8	8	307	0	0.23	459133	7.19357e+06
465.7	131.6	470.4	38.1	472.3	158.3	6	325	0	0.17	459138	7.19357e+06
469.1	137.1	474.9	41.5	475.5	158.6	4	327	0.54	3.06	459143	7.19357e+06
475.5	142.6	479.3	48.4	481.9	158.9	5	303	0	0.23	459148	7.19357e+06
478.7	145.4	488.3	51.8	485.2	159.3	6	326	0	0.25	459153	7.19357e+06
485.2	151	492.8	58.7	491.6	159.7	5	331	0	0.23	459158	7.19357e+06
488.4	156.6	497.3	62.1	494.9	159.8	5	343	0	0.19	459163	7.19357e+06
494.9	159.4	501.8	69	501.4	159.9	4	320	0	0.19	459168	7.19357e+06
498.1	165.1	506.3	72.4	504.6	160.3	6	310	0	0.17	459173	7.19357e+06
504.6	170.8	510.8	79.3	511.1	160.4	6	341	0	0.21	459178	7.19357e+06
507.9	173.6	515.3	82.8	514.4	160.6	6	326	0	0.16	459183	7.19357e+06
511.1	179.3	519.8	86.2	517.6	160.9	5	335	0	0.15	459188	7.19357e+06
517.6	185.1	524.3	93.1	524.1	161	5	336	0	0.19	459193	7.19357e+06
520.9	187.9	528.8	96.5	527.4	161.3	5	314	0	0.16	459198	7.19357e+06
106.4	67.7	109.7	22.1	122.2	150.6	7	313	0.8	10.5	458763	7.19356e+06
112.5	66.4	118.8	17.2	127.5	150.7	1	333	0.62	9.68	458768	7.19356e+06
115.6	64.8	123.3	15.4	130.3	150.5	5	140	0.48	7.38	458773	7.19356e+06
118.7	64.1	127.9	14.2	133	150.5	2	355	0.28	3.71	458778	7.19356e+06
124.9	63.3	132.3	10.9	138.6	150.4	6	337	0.15	1.7	458783	7.19356e+06
128.1	62.6	136.8	10.3	141.4	150.6	7	311	0.42	6.98	458788	7.19356e+06
134.4	61.8	141.2	9.7	147.2	150.8	3	114	0.65	4.51	458793	7.19356e+06
137.6	60.7	145.7	7.7	150.1	150.9	0	11	0.5	3.97	458798	7.19356e+06
144	60.1	150.2	6.9	156	150.7	2	276	0.15	2.07	458803	7.19356e+06
147.2	60	154.7	6.9	159	150.7	2	344	0.35	7.12	458808	7.19356e+06
153.7	60.3	159.3	3.4	165	150.8	6	35	0.16	3.75	458813	7.19356e+06
156.9	61.2	163.8	3.4	168	150.7	2	92	0.64	12.57	458818	7.19356e+06
160.2	58.9	168.4	3.4	171.1	150.8	4	265	0.1	1.81	458823	7.19356e+06
166.7	53.2	172.9	6.9	177.2	150.8	2	358	0.24	3.5	458828	7.19356e+06
170	47.4	177.5	6.9	180.3	150.9	2	192	0.9	9.38	458833	7.19356e+06
176.6	44.6	182.1	6.9	186.5	150.8	1	157	0.41	7.14	458838	7.19356e+06
179.9	39	186.7	6.9	189.6	150.9	2	350	0.26	4.39	458843	7.19356e+06
186.5	33.5	191.3	9.7	195.9	150.9	4	132	0.59	6.5	458848	7.19356e+06
189.8	30.9	195.9	12.4	199.1	150.9	3	235	0.61	8	458853	7.19356e+06
196.4	25.8	200.5	17.2	205.4	150.9	1	93	0.63	7.19	458858	7.19356e+06
199.8	21.2	209.7	19.5	208.6	151	1	302	0.75	6.59	458863	7.19356e+06
206.4	19.2	214.4	24.4	215	151	2	242	0.59	5.1	458868	7.19356e+06
209.8	16.2	219	26.9	218.2	151	6	27	0.63	7.38	458873	7.19356e+06
213.1	15	223.6	29.2	221.4	150.9	4	71	0.45	8.34	458878	7.19356e+06
219.8	15	228.3	34.1	227.9	150.6	8	62	0.49	3.68	458883	7.19356e+06
223.2	13.4	232.9	36.6	231.1	150.2	23	27	0.34	5.21	458888	7.19356e+06
229.9	9.5	237.4	41.5	237.6	149.5	0	-1	1	10.28	458893	7.19356e+06
329.1	6.7	337.6	6.9	336.1	149.8	5	260	0.58	6.67	458998	7.19356e+06
335.7	8.5	342.2	0	342.7	150.7	11	257	0	0.32	459003	7.19356e+06
339	13.4	346.8	0	346	151.9	7	279	0.82	10.02	459008	7.19356e+06
345.6	19	351.4	6.9	352.7	152.4	5	299	0.7	10.21	459013	7.19356e+06
348.9	21.8	356	10.3	356	152.7	2	292	0.78	7.93	459018	7.19356e+06
355.5	27.7	360.5	17.2	362.7	152.9	3	294	0.78	8.01	459023	7.19356e+06
358.8	33.5	365	20.7	366.1	153.1	3	279	0.79	10.63	459028	7.19356e+06
362.1	36.5	369.6	24.1	369.4	153.4	5	257	0.69	9.44	459033	7.19356e+06
368.7	42.4	374.1	31	376	153.8	2	192	0.6	9.05	459038	7.19356e+06
372	48.4	378.6	34.5	379.3	154.1	1	225	0.17	5.03	459043	7.19356e+06
378.7	51.4	383.1	38.5	385.8	154.2	3	261	0.68	11.81	459048	7.19356e+06
382	57.3	392.2	35.5	389.1	154.5	4	320	0.26	5.64	459053	7.19356e+06
388.7	63.3	396.8	29.6	395.7	154.5	5	344	0.47	12.72	459058	7.19356e+06
392	66.3	401.3	26.9	399	154.2	15	64	0.6	12.59	459063	7.19356e+06
398.7	72.2	405.9	21.8	405.6	153.6	6	290	0	0.19	459068	7.19356e+06
402	78.2	410.4	18.6	409	154	8	150	0.29	2.19	459073	7.19356e+06
405.3	81.2	415	15.4	412.3	153.9	1	153	0	0.16	459078	7.19356e+06
411.9	87.2	419.6	9.7	418.9	154.2	12	252	0.54	4.79	459083	7.19356e+06
415.2	93.2	424.2	7.7	422.2	154.7	3	352	0.65	7.48	459088	7.19356e+06
421.8	96	428.7	3.4	428.9	154.9	9	349	0.53	3.32	459093	7.19356e+06
425.1	100.8	433.2	0	432.2	155.3	7	284	0.19	1.41	459098	7.19356e+06
431.7	105.7	437.6	3.4	438.8	155.8	3	311	0	0.11	459103	7.19356e+06
435	108.2	442	6.9	442.2	156	6	301	0	0.22	459108	7.19356e+06
441.6	113.2	446.5	13.8	448.6	156.6	6	303	0	0.25	459113	7.19356e+06
444.9	118.3	450.9	17.2	451.8	156.9	5	323	0	0.2	459118	7.19356e+06
451.5	120.9	455.4	24.1	458.2	157.2	6	335	0	0.25	459123	7.19356e+06
454.9	126.2	459.8	27.6	461.4	157.4	8	316	0	0.24	459128	7.19356e+06
458.2	131.5	464.3	31	464.6	158.1	7	298	0	0.25	459133	7.19356e+06
464.6	134.2	468.8	37.9	471.1	158.6	7	312	0	0.15	459138	7.19356e+06
467.8	139.6	473.3	41.4	474.3	158.9	5	347	0.67	4.88	459143	7.19356e+06
474.3	145	477.8	48.2	480.8	159.2	7	313	0	0.18	459148	7.19356e+06
477.5	147.7	486.7	51.7	484	159.7	6	300	0	0.19	459153	7.19356e+06
484	153.2	491.2	58.6	490.5	160	6	331	0.05	1.91	459158	7.19356e+06
487.2	158.8	495.7	62	493.7	160.1	4	7	0	0.13	459163	7.19356e+06
493.7	161.6	500.2	68.9	500.2	160.3	8	332	0	0.23	459168	7.19356e+06
497	167.1	504.8	72.4	503.5	160.7	8	329	0	0.21	459173	7.19356e+06
503.5	172.8	509.3	79.3	510	161	6	346	0	0.11	459178	7.19356e+06
506.7	175.6	513.8	82.7	513.2	161.1	6	343	0	0.18	459183	7.19356e+06
510	181.2	518.3	86.1	516.5	161.3	7	324	0	0.21	459188	7.19356e+06
516.5	186.9	522.8	93	523	161.5	5	345	0	0.12	459193	7.19356e+06
519.8	189.7	527.3	96.5	526.3	161.6	5	318	0.03	5.87	459198	7.19356e+06
526.3	195.4	531.8	103.4	532.9	161.9	5	359	0.56	11.75	459203	7.19356e+06
94.1	75.9	99.2	21.8	109.9	150.7	1	184	0.78	9.56	458753	7.19356e+06
100.2	74.2	103.8	18.6	115.2	150.9	9	194	0.63	10.01	458758	7.19356e+06
103.3	73.5	108.3	17.2	117.9	150.5	10	136	0.64	8.44	458763	7.19356e+06
109.5	72.1	117.3	12.4	123.4	150.4	2	4	0.7	7.29	458768	7.19356e+06
112.7	70.6	121.8	9.7	126.2	150.6	2	211	0.38	4.18	458773	7.19356e+06
115.8	70	126.2	7.7	129	150.7	3	298	0.65	6.05	458778	7.19356e+06
122.2	69.3	130.7	4.9	134.8	150.8	5	322	0.65	6.79	458783	7.19356e+06
125.4	68.4	135.2	3.4	137.7	150.7	2	356	0.26	6.88	458788	7.19356e+06
131.9	67.7	139.7	3.4	143.6	150.7	3	254	0.48	4.56	458793	7.19356e+06
135.1	66.6	144.2	3.4	146.6	150.8	2	130	0.23	2.42	458798	7.19356e+06
141.7	66.1	148.8	0	152.6	150.7	3	180	0.06	2.78	458803	7.19356e+06
144.9	66	153.3	0	155.7	150.7	3	155	0.05	2.05	458808	7.19356e+06
151.5	66.3	157.9	0	161.8	150.7	6	172	0	0.38	458813	7.19356e+06
154.8	63.6	162.5	0	164.9	150.5	2	168	0.1	2.99	458818	7.19356e+06
158.1	60.7	167.1	0	168	150.6	9	202	0.07	3.43	458823	7.19356e+06
164.7	55.2	171.7	0	174.2	150.7	8	184	0.28	6.08	458828	7.19356e+06
168	49.7	176.3	0	177.4	150.8	4	178	0.13	2.44	458833	7.19356e+06
174.7	47	180.9	0	183.7	151	2	225	0.1	3.01	458838	7.19356e+06
178	41.7	185.5	0	186.9	151	4	250	0.43	3.84	458843	7.19356e+06
184.7	36.6	190.1	4.9	193.2	150.9	3	12	0.25	6.48	458848	7.19356e+06
188	34.2	194.8	7.7	196.4	150.9	3	329	0.03	2.07	458853	7.19356e+06
194.7	29.7	199.4	12.4	202.9	151	3	282	0.59	6.65	458858	7.19356e+06
198.1	25.8	208.7	14.6	206.1	151	1	249	0.31	4.87	458863	7.19356e+06
204.8	24.2	213.4	19.5	212.6	150.9	0	45	0.66	6.31	458868	7.19356e+06
208.2	21.8	218	22.1	215.8	150.9	2	306	0.74	7.23	458873	7.19356e+06
211.4	21	222.4	24.4	219	151	2	104	0.7	13.7	458878	7.19356e+06
217.9	21	226.9	29.2	225.6	151	1	295	0.5	10.93	458883	7.19356e+06
221.2	15	231.4	31.8	228.8	150.4	15	91	0.66	11.51	458888	7.19356e+06
227.8	9	235.9	35.1	235.4	149.5	0	-1	0.9	4.45	458893	7.19356e+06
231.1	6	240.4	36	238.7	149.5	0	-1	1	7.74	458898	7.19356e+06
237.6	0	244.9	38.5	245.2	149.5	0	-1	1	5.66	458903	7.19356e+06
327.1	3	336.5	7.7	334.3	149.6	3	231	0.39	7.13	458998	7.19356e+06
333.7	6	341	3.4	341	150.8	24	267	0.84	11.15	459003	7.19356e+06
337	12	345.5	0	344.3	152.1	9	288	0.8	12.04	459008	7.19356e+06
343.6	18	350	6.9	350.9	152.7	5	268	0.72	7.22	459013	7.19356e+06
347	21	354.5	10.3	354.2	152.9	4	303	0.78	8.35	459018	7.19356e+06
353.6	27	359.1	17.2	360.8	153.1	3	59	0.81	16.11	459023	7.19356e+06
356.9	33	363.6	20.7	364.1	153.4	4	328	0.69	10.21	459028	7.19356e+06
360.3	36	368.1	24.1	367.3	153.6	5	302	0.86	16.89	459033	7.19356e+06
366.9	42	372.7	31	373.9	153.8	6	335	0.66	8.85	459038	7.19356e+06
370.2	48	377.2	34.5	377.3	154.2	7	333	0.73	14.4	459043	7.19356e+06
376.9	51	381.8	41.4	383.9	154.4	4	12	0.11	5.9	459048	7.19356e+06
380.3	57	390.9	39.3	387.2	154.5	1	15	0.77	9.67	459053	7.19356e+06
386.9	63	395.4	33.9	393.8	154.6	4	300	0.55	9.56	459058	7.19356e+06
390.2	66	400	30.8	397.1	154.6	17	69	0.76	9.7	459063	7.19356e+06
396.7	72	404.6	24.8	403.8	153.7	1	355	0.32	11.62	459068	7.19356e+06
400	78	409.2	22.1	407.1	153.6	1	202	0	0.16	459073	7.19356e+06
403.3	81	413.7	19.5	410.4	153.7	5	282	0.28	0.7	459078	7.19356e+06
409.9	87	418.2	14.2	417.1	154.1	10	278	0.18	0.6	459083	7.19356e+06
413.2	93	422.6	10.9	420.4	154.7	6	214	0.37	6.79	459088	7.19356e+06
419.8	96	427	4.9	426.8	155	8	250	0.69	7.18	459093	7.19356e+06
423.2	102	431.5	3.4	430	155.8	6	292	0.52	1.29	459098	7.19356e+06
429.8	108	435.9	3.4	436.4	155.9	2	315	0	0.14	459103	7.19356e+06
433.1	111	440.4	6.9	439.6	156.2	6	271	0	0.21	459108	7.19356e+06
439.6	116.5	444.8	13.8	446.1	156.7	5	287	0	0.2	459113	7.19356e+06
442.8	121.5	449.3	17.2	449.3	157.2	8	302	0	0.33	459118	7.19356e+06
449.3	124	453.8	24.1	455.7	157.7	7	334	0	0.51	459123	7.19356e+06
452.5	129.1	458.2	27.6	459	157.9	5	323	0	0.2	459128	7.19356e+06
455.7	134.3	462.7	31	462.2	158.4	10	289	0	0.31	459133	7.19356e+06
462.2	137	467.2	37.9	468.7	159.1	6	308	0	0.21	459138	7.19356e+06
465.4	142.2	471.7	41.4	471.9	159.4	6	331	0	0.17	459143	7.19356e+06
471.9	147.6	476.2	48.2	478.4	159.6	4	331	0	0.15	459148	7.19356e+06
475.2	150.3	485.2	51.7	481.7	159.9	4	304	0	0.22	459153	7.19356e+06
481.7	155.7	489.7	58.6	488.2	160.3	5	319	0	0.19	459158	7.19356e+06
484.9	161.1	494.3	62	491.5	160.5	4	334	0	0.15	459163	7.19356e+06
491.5	163.9	498.8	68.9	498	160.9	6	308	0	0.19	459168	7.19356e+06
494.7	169.4	503.3	72.4	501.2	161.2	6	328	0	0.23	459173	7.19356e+06
501.2	174.9	507.8	79.3	507.8	161.4	5	330	0	0.14	459178	7.19356e+06
504.5	177.7	512.3	82.7	511.1	161.5	6	338	0	0.14	459183	7.19356e+06
507.8	183.3	516.8	86.1	514.3	161.7	4	342	0	0.21	459188	7.19356e+06
514.3	188.9	521.3	93	520.9	161.9	4	342	0	0.13	459193	7.19356e+06
517.6	191.7	525.8	96.5	524.1	161.9	4	331	0	0.2	459198	7.19356e+06
524.1	197.4	530.3	103.4	530.7	162.3	8	323	0.49	11.74	459203	7.19356e+06
89.4	80.8	93.3	20.1	105	150.6	7	183	0.83	10.72	458748	7.19355e+06
92.5	78.7	97.9	18.6	107.7	150.7	3	162	0.68	10	458753	7.19355e+06
98.7	77.1	102.3	15.4	113	150.3	1	214	0.56	8.38	458758	7.19355e+06
101.8	76.5	106.8	14.2	115.8	150.3	2	48	0.4	7.9	458763	7.19355e+06
108.1	75	115.7	9.7	121.4	150.4	3	291	0.36	3.57	458768	7.19355e+06
111.3	73.5	120.2	7.7	124.2	150.7	2	303	0.7	4.61	458773	7.19355e+06
114.5	73	124.7	4.9	127.1	150.8	3	214	0.6	8.55	458778	7.19355e+06
121	72.2	129.2	3.4	133	150.7	4	79	0.64	6.44	458783	7.19355e+06
124.2	71.3	133.8	0	135.9	150.5	4	138	0.06	4.17	458788	7.19355e+06
130.8	70.6	138.3	0	141.9	150.5	8	339	0	0.27	458793	7.19355e+06
134	69.6	142.9	0	144.9	150.7	4	333	0.1	2.17	458798	7.19355e+06
140.6	69.1	147.5	0	151	150.7	2	321	0.22	3.16	458803	7.19355e+06
143.9	69	152.1	3.4	154.1	150.8	1	8	0.51	8.81	458808	7.19355e+06
150.5	69.3	156.7	3.4	160.3	150.8	2	6	0.4	7.77	458813	7.19355e+06
153.8	64.6	161.3	3.4	163.4	150.7	3	347	0	0.23	458818	7.19355e+06
157.2	61.8	165.9	3.4	166.5	150.8	2	32	0.76	8.26	458823	7.19355e+06
163.8	56.4	170.6	3.4	172.8	150.9	2	35	0.64	8.39	458828	7.19355e+06
167.2	51	175.2	0	176	151	3	168	0.29	5.7	458833	7.19355e+06
173.8	48.4	179.8	0	182.4	151	6	344	0.28	4.79	458838	7.19355e+06
177.2	43.3	184.5	0	185.6	150.8	11	31	0.2	3.85	458843	7.19355e+06
183.9	38.4	189.1	3.4	192	150.8	5	227	0.06	2.48	458848	7.19355e+06
187.3	36.1	193.8	4.9	195.2	150.9	2	172	0.78	6.47	458853	7.19355e+06
194	31.9	198.4	9.7	201.7	150.9	0	239	0.78	8.34	458858	7.19355e+06
197.3	28.3	207.4	12.4	204.9	150.9	2	358	0.76	6.53	458863	7.19355e+06
203.8	26.8	211.9	17.2	211.4	151	3	122	0.78	7.01	458868	7.19355e+06
207	24.7	216.3	19.5	214.7	151	4	56	0.69	6.59	458873	7.19355e+06
210.3	24	220.8	22.1	217.9	151.1	3	216	0.88	12.92	458878	7.19355e+06
216.9	21	225.3	26.9	224.5	150.9	4	144	0.6	12.47	458883	7.19355e+06
220.2	15	229.8	29.2	227.8	150.4	5	347	0.87	9.43	458888	7.19355e+06
226.7	9	234.4	31.8	234.3	150.7	13	29	0.34	3.12	458893	7.19355e+06
230	6	238.9	32.7	237.6	150	21	56	0.53	1.98	458898	7.19355e+06
236.7	0	243.4	35.5	244.1	149.5	0	-1	1	5.06	458903	7.19355e+06
326.1	3	335	9.7	333.4	149.6	4	106	0.29	3.83	458998	7.19355e+06
332.8	6	339.5	3.4	340	150.3	33	290	0.87	11.19	459003	7.19355e+06
336.1	12	344	0	343.3	152.3	11	267	0.7	8.67	459008	7.19355e+06
342.7	18	348.6	6.9	349.9	152.8	4	263	0.86	6.91	459013	7.19355e+06
346	21	353.1	10.3	353.2	153.1	3	269	0.85	7.28	459018	7.19355e+06
352.7	27	357.6	17.2	359.8	153.3	2	330	0.77	16.13	459023	7.19355e+06
356	33	362.2	20.7	363.1	153.6	6	301	0.8	7.15	459028	7.19355e+06
359.4	36	366.7	24.1	366.4	153.8	4	304	0.67	8.72	459033	7.19355e+06
366.1	42	371.3	31	373	154.1	6	280	0.65	8.66	459038	7.19355e+06
369.4	48	375.9	34.5	376.3	154.4	3	16	0.67	4.5	459043	7.19355e+06
376	51	380.4	41.4	382.9	154.4	1	264	0.51	7.85	459048	7.19355e+06
379.3	57	389.6	41.5	386.2	154.7	2	244	0.51	7.3	459053	7.19355e+06
385.8	63	394.1	35.5	392.9	154.7	4	111	0.57	8.96	459058	7.19355e+06
389.1	66	398.7	32.5	396.2	154.7	8	138	0.64	6.38	459063	7.19355e+06
395.7	72	403.1	26.9	402.9	153.9	8	103	0.34	5.97	459068	7.19355e+06
399	78	407.6	24.4	406.2	153.7	6	343	0.05	0.35	459073	7.19355e+06
402.3	81	412	21.8	409.5	154	4	342	0.22	1.76	459078	7.19355e+06
409	87	416.4	15.4	415.9	154.3	3	283	0.3	1.54	459083	7.19355e+06
412.3	93	420.9	12.4	419.1	154.3	1	219	0.4	7.27	459088	7.19355e+06
418.9	96	425.3	6.9	425.5	155	13	277	0.89	6.37	459093	7.19355e+06
422.2	102	429.8	3.4	428.7	155.9	1	194	0.78	3.29	459098	7.19355e+06
428.7	108	434.3	3.4	435.2	155.9	3	245	0	0.12	459103	7.19355e+06
432	111	438.7	6.9	438.4	156.2	3	272	0	0.19	459108	7.19355e+06
438.4	117	443.2	13.8	444.8	156.7	8	270	0	0.2	459113	7.19355e+06
441.6	123	447.7	17.2	448.1	157.4	11	281	0	0.29	459118	7.19355e+06
448.1	125.6	452.2	24.1	454.6	158.1	6	312	0.68	4.19	459123	7.19355e+06
451.3	130.7	456.7	27.6	457.8	158.3	6	337	0.52	3.08	459128	7.19355e+06
454.6	135.8	461.2	31	461	158.6	7	288	0	0.24	459133	7.19355e+06
461	138.4	465.7	37.9	467.5	159.3	5	291	0	0.14	459138	7.19355e+06
464.3	143.7	470.2	41.4	470.8	159.7	4	305	0	0.17	459143	7.19355e+06
470.8	148.9	474.7	48.2	477.3	159.9	6	325	0	0.2	459148	7.19355e+06
474	151.6	483.8	51.7	480.6	160.2	4	311	0	0.18	459153	7.19355e+06
480.6	157	488.3	58.6	487.1	160.5	4	327	0	0.11	459158	7.19355e+06
483.8	162.4	492.8	62	490.4	160.8	5	305	0	0.11	459163	7.19355e+06
490.4	165.1	497.3	68.9	496.9	161.2	5	294	0	0.27	459168	7.19355e+06
493.6	170.6	501.8	72.4	500.2	161.6	6	335	0	0.2	459173	7.19355e+06
500.2	176.1	506.3	79.3	506.7	161.7	3	348	0	0.11	459178	7.19355e+06
503.4	178.8	510.8	82.7	510	161.9	6	324	0	0.24	459183	7.19355e+06
506.7	184.4	515.3	86.1	513.2	162.2	5	329	0	0.27	459188	7.19355e+06
513.2	190	519.8	93	519.8	162.2	5	347	0	0.16	459193	7.19355e+06
516.5	192.8	524.3	96.5	523	162.4	5	344	0	0.21	459198	7.19355e+06
523	198.4	528.8	103.4	529.6	162.5	4	324	0.05	9.18	459203	7.19355e+06
78.7	89.9	83	23.1	95.1	150.6	1	273	0.86	9.96	458738	7.19355e+06
81.7	87.5	87.3	21.8	97.6	150.4	2	232	0.86	10.1	458743	7.19355e+06
87.9	86.4	91.7	17.2	102.8	150.1	6	162	0.46	2.38	458748	7.19355e+06
91	84.5	96.2	15.4	105.5	150.3	5	250	0.76	4.72	458753	7.19355e+06
97.3	83	100.7	12.4	111	150.6	6	342	0.71	3.87	458758	7.19355e+06
100.5	82.4	105.2	10.9	113.8	150.6	4	16	0.26	5.43	458763	7.19355e+06
106.9	80.8	114.2	7.7	119.5	150.6	2	264	0.23	3.38	458768	7.19355e+06
110.1	79.4	118.8	4.9	122.4	150.7	2	212	0.67	9.28	458773	7.19355e+06
113.3	78.9	123.3	3.4	125.3	150.6	5	152	0	0.2	458778	7.19355e+06
119.9	78.2	127.9	0	131.2	150.5	7	312	0.05	5.73	458783	7.19355e+06
123.1	77.1	132.5	0	134.2	150.6	2	75	0.25	7.59	458788	7.19355e+06
129.7	76.5	137.1	3.4	140.3	150.8	2	293	0.42	7.08	458793	7.19355e+06
133	75.5	141.7	3.4	143.3	150.8	4	357	0.23	4.86	458798	7.19355e+06
139.6	75.1	146.3	3.4	149.5	150.9	2	53	0	0.11	458803	7.19355e+06
143	75	151	4.9	152.6	150.9	3	143	0.48	5.65	458808	7.19355e+06
149.6	72.5	155.6	6.9	158.8	151	3	303	0.81	8.17	458813	7.19355e+06
152.9	67.1	160.3	6.9	162	150.8	3	287	0.55	7.56	458818	7.19355e+06
156.3	64.4	164.9	6.9	165.1	150.8	1	195	0.49	6.72	458823	7.19355e+06
163	59.2	169.6	4.9	171.5	150.9	1	45	0.72	7.03	458828	7.19355e+06
166.3	54.1	174.2	3.4	174.7	150.9	2	228	0.58	7.24	458833	7.19355e+06
173	51.6	178.9	3.4	181.1	150.8	2	169	0.14	5.25	458838	7.19355e+06
176.4	46.9	183.5	0	184.3	151	3	236	0.44	6.6	458843	7.19355e+06
183.1	42.4	187.9	0	190.8	151	2	90	0.6	5.37	458848	7.19355e+06
186.4	40.4	192.4	3.4	194	150.8	2	238	0.13	4.2	458853	7.19355e+06
192.9	36.6	196.8	7.7	200.5	150.9	2	302	0.6	10.21	458858	7.19355e+06
196.1	33.5	205.8	9.7	203.8	151.1	4	167	0.59	7.62	458863	7.19355e+06
202.7	32.3	210.3	14.6	210.3	151.1	4	238	0.79	8.33	458868	7.19355e+06
206	30.6	214.8	17.2	213.6	151.1	3	158	0.19	3.33	458873	7.19355e+06
209.3	24.7	219.3	19.5	216.9	151	2	92	0.77	11.38	458878	7.19355e+06
215.9	21.8	223.9	24.4	223.4	151	6	345	0.63	11.97	458883	7.19355e+06
219.2	16.2	228.4	26.2	226.7	151	7	357	0.67	10.44	458888	7.19355e+06
225.8	10.8	233	28.4	233.2	151	4	159	0.64	10.76	458893	7.19355e+06
229.1	8.5	237.5	29.4	236.5	150.7	10	123	0.19	1.33	458898	7.19355e+06
235.7	4.2	242.1	32.5	243	149.5	2	339	0.43	2.55	458903	7.19355e+06
321.9	0	329	10.9	329.1	149.5	2	287	1	6.46	458993	7.19355e+06
325.2	6	333.6	7.7	332.4	150	15	312	0	0.72	458998	7.19355e+06
331.8	8.5	338.1	3.4	339	151.8	18	302	0.73	9.5	459003	7.19355e+06
335.2	13.4	342.6	0	342.3	152.3	7	256	0.45	7.38	459008	7.19355e+06
341.8	19	347.2	6.9	348.9	152.9	3	248	0.58	6.33	459013	7.19355e+06
345.2	21.8	351.7	10.3	352.2	153.1	3	305	0.78	5.55	459018	7.19355e+06
351.8	27.7	356.3	17.2	358.8	153.3	4	297	0.48	10.97	459023	7.19355e+06
355.2	33.5	360.9	20.7	362.1	153.5	3	230	0.49	10.87	459028	7.19355e+06
358.5	36.5	365.4	24.1	365.4	153.9	4	223	0.68	14.04	459033	7.19355e+06
365.1	42.4	370	31	372	154.3	6	322	0.54	5.39	459038	7.19355e+06
368.4	48.4	374.6	34.5	375.4	154.5	2	113	0.61	5.25	459043	7.19355e+06
374.9	51.4	379.1	41.4	382	154.6	6	348	0.58	9.72	459048	7.19355e+06
378.2	57.3	388.1	41.6	385.3	154.6	4	41	0.62	15.34	459053	7.19355e+06
384.8	63.3	392.6	37.3	392	154.3	5	191	0.32	9.91	459058	7.19355e+06
388.1	66.3	397	34.5	395.3	154.4	10	112	0.02	1.86	459063	7.19355e+06
394.8	72.2	401.4	28.4	401.9	153.9	1	62	0	0.19	459068	7.19355e+06
398.1	78.2	405.9	25.1	405	154	3	306	0.02	0.45	459073	7.19355e+06
401.4	81.2	410.3	21.8	408.2	154.1	2	278	0.13	0.83	459078	7.19355e+06
408	87.2	414.8	15.4	414.6	154.2	5	271	0	0.2	459083	7.19355e+06
411.3	93.2	419.3	12.4	417.9	154.7	9	326	0.92	3.71	459088	7.19355e+06
417.9	96.2	423.7	6.9	424.3	155	13	290	0.34	4.27	459093	7.19355e+06
421.1	102.2	428.2	3.4	427.5	155.7	2	157	0.1	1.02	459098	7.19355e+06
427.5	108.2	432.7	3.4	434	155.8	3	253	0	0.17	459103	7.19355e+06
430.7	111.2	437.2	6.9	437.2	156.3	5	279	0	0.16	459108	7.19355e+06
437.2	117.2	441.7	13.8	443.7	156.7	7	283	0	0.18	459113	7.19355e+06
440.4	123.1	446.2	17.2	446.9	157.6	11	283	0	0.35	459118	7.19355e+06
446.9	126.1	450.7	24.1	453.4	158.4	5	299	0	0.25	459123	7.19355e+06
450.1	132.1	455.2	27.6	456.6	158.8	4	321	0.08	2.56	459128	7.19355e+06
453.4	138.1	459.7	31	459.9	158.8	3	352	0.18	3.56	459133	7.19355e+06
459.9	141.1	464.2	37.9	466.4	159.4	7	279	0	0.21	459138	7.19355e+06
463.1	146.6	468.7	41.4	469.7	159.9	5	301	0	0.17	459143	7.19355e+06
469.7	151.8	473.3	48.2	476.2	160.2	4	311	0	0.18	459148	7.19355e+06
472.9	154.4	482.2	51.7	479.5	160.5	5	295	0	0.17	459153	7.19355e+06
479.5	159.7	486.7	58.6	486	160.7	3	318	0	0.09	459158	7.19355e+06
482.7	165	491.2	62	489.3	161	3	301	0	0.22	459163	7.19355e+06
489.3	167.7	495.7	68.9	495.8	161.3	5	299	0	0.22	459168	7.19355e+06
492.5	173.1	500.2	72.4	499.1	161.8	4	300	0	0.2	459173	7.19355e+06
499.1	178.5	504.8	79.3	505.6	162	3	317	0	0.14	459178	7.19355e+06
502.3	181.2	509.3	82.7	508.9	162.2	4	329	0	0.14	459183	7.19355e+06
505.6	186.7	513.8	86.1	512.1	162.4	5	338	0	0.13	459188	7.19355e+06
512.1	192.2	518.3	93	518.7	162.6	4	346	0	0.21	459193	7.19355e+06
515.4	195	522.8	96.5	522	162.8	4	0	0	0.13	459198	7.19355e+06
522	200.6	527.3	103.4	528.5	162.8	5	307	0	0.14	459203	7.19355e+06
525.2	206.1	531.8	106.8	531.8	163.1	5	317	0.09	3	459208	7.19355e+06
66.3	99.4	72.4	23.1	82.8	150.5	1	217	0.75	9.06	458728	7.19354e+06
69.3	97.9	76.7	21.8	85.3	150.4	5	177	0.81	10.41	458733	7.19354e+06
75.6	95.3	81.2	17.2	90.4	150.3	7	176	0.8	8.36	458738	7.19354e+06
78.7	93	85.6	15.4	93.1	150.2	4	131	0.24	5.42	458743	7.19354e+06
85.1	92	90.1	12.4	98.6	150.3	6	347	0.54	6.53	458748	7.19354e+06
88.3	90.2	94.7	9.7	101.3	150.6	5	277	0.69	10.16	458753	7.19354e+06
94.8	88.8	99.2	6.9	107	150.6	3	337	0.53	6.1	458758	7.19354e+06
98.1	88.2	103.8	4.9	109.9	150.7	2	302	0.77	8.88	458763	7.19354e+06
104.6	86.6	112.9	3.4	115.8	150.7	3	191	0.6	6.26	458768	7.19354e+06
107.9	85.3	117.5	0	118.8	150.5	4	139	0	0.27	458773	7.19354e+06
111.2	84.9	122.1	0	121.8	150.7	3	321	0.33	9.62	458778	7.19354e+06
117.9	84.2	126.8	3.4	127.9	150.7	1	264	0	0.14	458783	7.19354e+06
121.2	83	131.4	4.9	131	150.7	2	246	0.73	11.58	458788	7.19354e+06
127.9	82.4	136	9.7	137.2	150.8	5	253	0.16	5.56	458793	7.19354e+06
131.2	81.5	140.7	10.3	140.3	150.8	1	45	0.13	1.98	458798	7.19354e+06
137.9	81.1	145.3	10.3	146.6	150.8	2	304	0.26	7.18	458803	7.19354e+06
141.3	80.5	150	10.9	149.8	151	2	39	0.5	9.63	458808	7.19354e+06
148	75.2	154.7	13.8	156.1	150.8	3	151	0.14	5.39	458813	7.19354e+06
151.4	70	159.3	13.8	159.3	151	2	322	0.51	5.48	458818	7.19354e+06
154.8	67.4	163.8	13.8	162.5	151	3	202	0.71	5.68	458823	7.19354e+06
161.3	62.4	168.4	10.9	169	150.9	1	193	0.68	6.02	458828	7.19354e+06
164.6	57.6	172.9	10.3	172.2	151	4	119	0.03	3.76	458833	7.19354e+06
171.1	55.3	177.4	7.7	178.7	150.9	2	7	0.63	8.06	458838	7.19354e+06
174.3	50.9	181.8	6.9	182	151	5	166	0.5	7.12	458843	7.19354e+06
180.9	46.9	186.3	3.4	188.5	151	3	304	0.59	6.63	458848	7.19354e+06
184.2	45	190.8	0	191.8	151	4	71	0.67	6.69	458853	7.19354e+06
190.8	41.7	195.3	3.4	198.4	150.7	5	204	0.24	7.7	458858	7.19354e+06
194.1	39	204.3	4.9	201.7	150.9	5	320	0.31	1.55	458863	7.19354e+06
200.7	36	208.9	9.7	208.2	151	1	166	0.58	7.89	458868	7.19354e+06
204	30	213.4	12.4	211.4	150.8	3	54	0.56	7.68	458873	7.19354e+06
207.3	24	218	14.6	214.7	151	8	342	0.64	9.4	458878	7.19354e+06
214	21	222.5	18.6	221.2	151.1	3	308	0.88	9.66	458883	7.19354e+06
217.3	15	227.1	20.1	224.5	151.2	2	120	0.3	4.24	458888	7.19354e+06
224	9	231.7	21.8	231.1	151	8	69	0.85	6.93	458893	7.19354e+06
227.3	6	236.2	23.1	234.3	149.5	15	15	0.59	10.98	458898	7.19354e+06
234	0	240.8	26.9	240.9	149.5	2	97	0.96	9.83	458903	7.19354e+06
310.1	6	318.5	17.2	317.2	149.5	0	-1	1	1.23	458983	7.19354e+06
313.4	4.2	323.1	14.2	320.5	149.5	0	-1	0.97	9.39	458988	7.19354e+06
320.1	3	327.6	7.7	327.1	149.9	12	335	0.6	4.7	458993	7.19354e+06
323.4	6.7	332.2	4.9	330.4	151	20	294	0.2	5.57	458998	7.19354e+06
330.1	9.5	336.7	0	337	152.2	2	229	0.27	4.71	459003	7.19354e+06
333.4	15.3	341.3	0	340.3	152.5	4	322	0.7	13.1	459008	7.19354e+06
340	21.2	345.8	6.9	347	152.9	3	273	0.68	8.67	459013	7.19354e+06
343.3	24.2	350.4	10.3	350.3	153.1	3	258	0.74	9.74	459018	7.19354e+06
349.9	29.5	355	17.2	356.9	153.3	4	346	0.2	5.62	459023	7.19354e+06
353.2	35.1	359.6	20.7	360.3	153.6	5	321	0.63	8.28	459028	7.19354e+06
356.5	37.9	364.2	24.1	363.6	153.8	4	273	0.78	10.79	459033	7.19354e+06
363.1	43.7	368.7	31	370.2	154.2	4	282	0.55	5.03	459038	7.19354e+06
366.4	49.5	373.1	34.5	373.6	154.6	5	295	0.8	4.08	459043	7.19354e+06
373	52.4	377.6	37.3	380.1	154.8	1	51	0.68	5.85	459048	7.19354e+06
376.3	58.2	386.4	35.5	383.3	154.9	2	59	0.59	5.42	459053	7.19354e+06
382.9	64.1	390.9	32.5	389.7	154.5	8	321	0.45	5.71	459058	7.19354e+06
386.2	67.1	395.3	30.8	392.9	154.2	3	4	0.29	1.89	459063	7.19354e+06
392.9	73	399.8	27.6	399.3	154.2	2	312	0.08	0.3	459068	7.19354e+06
396.1	78.9	404.2	24.1	402.5	154.2	4	344	0.36	2.66	459073	7.19354e+06
399.3	81.9	408.7	20.7	405.7	154.5	13	357	0.61	5.82	459078	7.19354e+06
405.7	87.8	413.2	13.8	412.2	154.5	9	30	0.7	3.41	459083	7.19354e+06
409	93.8	417.7	10.3	415.4	155.1	4	286	0.58	6.96	459088	7.19354e+06
415.4	96.7	422.2	3.4	421.9	155.6	10	249	0.6	5.55	459093	7.19354e+06
418.6	102.7	426.6	0	425.1	155.7	0	90	0	0.11	459098	7.19354e+06
425.1	108.7	431.1	3.4	431.6	155.7	5	291	0	0.39	459103	7.19354e+06
428.4	111.6	435.6	6.9	434.8	156.4	6	293	0	0.36	459108	7.19354e+06
434.8	117.6	440.2	13.8	441.3	156.9	6	298	0	0.22	459113	7.19354e+06
438.1	123.6	444.7	17.2	444.6	157.6	11	262	0	0.39	459118	7.19354e+06
444.6	126.6	449.2	24.1	451.1	158.4	8	277	0.48	3.22	459123	7.19354e+06
447.9	132.5	453.7	27.6	454.4	158.9	6	301	0.02	1.72	459128	7.19354e+06
451.1	138.5	458.2	31	457.7	159.2	4	345	0.71	4.34	459133	7.19354e+06
457.7	141.5	462.7	37.9	464.2	159.5	7	290	0	0.21	459138	7.19354e+06
460.9	147.5	467.2	41.4	467.5	160.1	4	291	0	0.25	459143	7.19354e+06
467.5	153.5	471.7	48.2	474	160.5	4	310	0	0.15	459148	7.19354e+06
470.8	156.5	480.7	51.7	477.3	160.7	3	323	0.03	2.02	459153	7.19354e+06
477.3	162.4	485.2	58.6	483.8	160.9	4	296	0.32	4.33	459158	7.19354e+06
480.6	167.8	489.7	62	487.1	161.3	4	316	0	0.2	459163	7.19354e+06
487.1	170.5	494.3	68.9	493.6	161.5	6	317	0	0.14	459168	7.19354e+06
490.4	175.8	498.8	72.4	496.9	161.9	4	300	0	0.11	459173	7.19354e+06
496.9	181.1	503.3	79.3	503.4	162.2	4	288	0	0.11	459178	7.19354e+06
500.2	183.8	507.8	82.7	506.7	162.4	5	287	0	0.16	459183	7.19354e+06
503.4	189.2	512.3	86.1	510	162.7	4	323	0	0.18	459188	7.19354e+06
510	194.7	516.8	93	516.5	162.9	3	309	0	0.24	459193	7.19354e+06
513.3	197.4	521.3	96.5	519.8	163	3	353	0	0.18	459198	7.19354e+06
519.9	202.9	525.8	103.4	526.3	163.2	5	338	0	0.21	459203	7.19354e+06
523.2	208.4	530.3	106.8	529.6	163.5	6	324	0.09	2.77	459208	7.19354e+06
58.6	105	66.2	24.4	75.6	150.7	8	21	0.68	10.39	458723	7.19354e+06
64.7	102	70.6	20.1	80.4	150.5	6	149	0.76	11.03	458728	7.19354e+06
67.9	100.6	75.1	18.6	83	150.1	4	139	0.71	9.4	458733	7.19354e+06
74.2	98.1	79.6	14.6	88.3	150.1	5	322	0.27	6.04	458738	7.19354e+06
77.4	95.9	84.2	12.4	91	150.4	4	318	0.41	10.95	458743	7.19354e+06
83.9	94.9	88.7	9.7	96.5	150.7	3	253	0.52	4.9	458748	7.19354e+06
87.2	93.1	93.3	7.7	99.4	150.7	4	239	0.61	11.83	458753	7.19354e+06
93.7	91.8	97.9	3.4	105.2	150.7	2	183	0.77	5.99	458758	7.19354e+06
97	91.1	102.5	3.4	108.1	150.7	8	152	0.25	4.56	458763	7.19354e+06
103.7	89.5	111.8	0	114.1	150.7	9	327	0.01	0.43	458768	7.19354e+06
107	88.3	116.5	0	117.2	150.8	2	28	0.03	1.24	458773	7.19354e+06
110.3	87.8	121.1	3.4	120.2	150.8	2	104	0.31	8.42	458778	7.19354e+06
117	87.2	125.8	6.9	126.4	150.8	1	209	0.03	0.51	458783	7.19354e+06
120.4	85.9	130.4	7.7	129.5	150.9	4	52	0.11	6.37	458788	7.19354e+06
127.1	85.3	135.1	12.4	135.8	150.9	3	181	0.03	1.76	458793	7.19354e+06
130.4	84.5	139.7	13.8	138.9	150.9	3	347	0.18	9.18	458798	7.19354e+06
137.2	84.1	144.2	13.8	145.3	150.9	1	180	0.57	11.69	458803	7.19354e+06
140.6	81.9	148.8	14.2	148.5	150.9	1	302	0	0.13	458808	7.19354e+06
147.2	76.7	153.3	17.2	154.9	150.9	5	2	0.54	8.37	458813	7.19354e+06
150.4	71.6	157.9	17.2	158.1	150.8	4	43	0.63	10.09	458818	7.19354e+06
153.7	69.1	162.4	17.2	161.3	150.9	2	12	0.27	6.15	458823	7.19354e+06
160.2	64.2	166.8	14.2	167.8	151	3	162	0	0.19	458828	7.19354e+06
163.5	59.5	171.3	13.8	171.1	151	3	150	0.37	4.02	458833	7.19354e+06
170	57.3	175.8	10.9	177.6	150.9	1	11	0.13	6.75	458838	7.19354e+06
173.3	53.1	180.3	9.7	180.9	151	2	338	0.6	10.46	458843	7.19354e+06
179.9	49.2	184.8	4.9	187.5	151	2	132	0.31	4.4	458848	7.19354e+06
183.2	47.4	189.3	3.4	190.8	151	4	15	0.49	6.92	458853	7.19354e+06
189.8	44.3	193.8	0	197.3	150.8	4	13	0.41	6.22	458858	7.19354e+06
193.1	39	202.9	3.4	200.5	150.7	11	221	0.4	8.28	458863	7.19354e+06
199.8	36	207.5	7.7	207	150.9	1	270	0.63	8.08	458868	7.19354e+06
203.1	30	212.1	9.7	210.3	150.8	2	11	0.84	9	458873	7.19354e+06
206.4	24	216.7	12.4	213.6	151.1	3	299	0.74	9.64	458878	7.19354e+06
213.1	21	221.2	15.4	220.2	151.2	2	38	0.72	9.18	458883	7.19354e+06
216.5	15	225.8	17.2	223.4	151.1	4	310	0.26	1.96	458888	7.19354e+06
223.2	9	230.4	18.6	230	150.9	5	99	0.72	9.6	458893	7.19354e+06
226.5	6	235	20.1	233.4	151.1	8	65	0.59	6.51	458898	7.19354e+06
233.2	0	239.7	24.4	240	150.4	20	44	0.5	5.45	458903	7.19354e+06
236.5	0	244.3	26.2	243.3	149.6	5	293	0	0.39	458908	7.19354e+06
309.2	6	317.1	14.6	316.2	149.5	0	-1	1	0	458983	7.19354e+06
312.6	6.7	321.7	12.4	319.5	149.6	6	293	0.79	6.48	458988	7.19354e+06
319.3	6	326.3	6.9	326.1	150.1	8	279	0.03	0.6	458993	7.19354e+06
322.5	8.5	330.8	3.4	329.4	151.4	23	279	0.62	17.16	458998	7.19354e+06
329.1	10.8	335.4	0	336.1	152.2	10	270	0.79	10.66	459003	7.19354e+06
332.4	16.2	340	3.4	339.4	152.8	2	219	0.68	11.4	459008	7.19354e+06
339	21.8	344.6	7.7	346	152.8	7	223	0.55	7.03	459013	7.19354e+06
342.3	24.7	349.2	10.9	349.4	153.2	5	275	0.03	2.79	459018	7.19354e+06
348.9	30.6	353.7	17.6	356	153.5	3	161	0.41	2.38	459023	7.19354e+06
352.2	36.2	358.2	21	359.4	153.6	4	112	0.36	3	459028	7.19354e+06
355.5	39	362.6	24.4	362.7	153.8	3	285	0.29	12.2	459033	7.19354e+06
362.1	44.6	367	31.2	369.2	154.3	5	269	0.38	8.18	459038	7.19354e+06
365.4	50.3	371.4	34.6	372.4	154.6	4	223	0.74	10.35	459043	7.19354e+06
372	53.2	375.9	34.5	378.8	154.8	6	295	0.68	7.12	459048	7.19354e+06
375.4	58.9	384.8	32.5	382	154.9	9	90	0.79	4.85	459053	7.19354e+06
382	64.8	389.2	29.4	388.4	154.4	8	139	0.39	3.88	459058	7.19354e+06
385.2	67.7	393.7	27.8	391.6	154.2	1	174	0.03	0.25	459063	7.19354e+06
391.6	73.5	398.2	25.1	398.1	154.6	14	282	0.37	2.51	459068	7.19354e+06
394.8	79.4	402.6	23.1	401.3	155.2	7	332	0.5	3.76	459073	7.19354e+06
398.1	82.4	407.1	20.1	404.5	155.3	8	26	0.53	7.73	459078	7.19354e+06
404.5	88.3	411.6	13.8	411	155.1	9	58	0.44	8.41	459083	7.19354e+06
407.7	94.2	416.1	10.3	414.2	155.1	7	239	0.87	7.19	459088	7.19354e+06
414.2	97.2	420.6	3.4	420.7	155.6	7	282	0.42	4.37	459093	7.19354e+06
417.5	103.1	425.1	0	423.9	155.8	3	309	0	0.12	459098	7.19354e+06
423.9	109	429.7	3.4	430.5	156.1	6	289	0.1	0.41	459103	7.19354e+06
427.2	112	434.2	6.9	433.7	156.5	6	277	0	0.36	459108	7.19354e+06
433.7	118	438.7	13.8	440.2	157.2	6	285	0	0.27	459113	7.19354e+06
437	123.9	443.2	17.2	443.5	157.5	5	280	0	0.36	459118	7.19354e+06
443.5	126.9	447.7	24.1	450	158.3	9	247	0.32	2.72	459123	7.19354e+06
446.8	132.9	452.2	27.6	453.3	158.9	7	264	0	0.25	459128	7.19354e+06
450	138.8	456.7	31	456.6	159.4	4	272	0	0.13	459133	7.19354e+06
456.6	141.8	461.2	37.9	463.1	159.8	5	295	0	0.24	459138	7.19354e+06
459.9	147.8	465.7	41.4	466.4	160.2	5	288	0	0.22	459143	7.19354e+06
466.4	153.7	470.2	48.2	472.9	160.6	5	286	0	0.18	459148	7.19354e+06
469.7	156.7	479.2	51.7	476.2	160.9	3	315	0.03	1.62	459153	7.19354e+06
476.2	162.7	483.8	58.6	482.7	161.1	5	295	0.49	4.69	459158	7.19354e+06
479.5	168.7	488.3	62	486	161.5	3	292	0	0.14	459163	7.19354e+06
486	171.7	492.8	68.9	492.5	161.8	4	269	0	0.19	459168	7.19354e+06
489.3	177.2	497.3	72.4	495.8	162	6	328	0	0.2	459173	7.19354e+06
495.8	182.5	501.8	79.3	502.3	162.5	7	302	0	0.21	459178	7.19354e+06
499.1	185.2	506.3	82.7	505.6	162.7	5	318	0	0.18	459183	7.19354e+06
502.4	190.5	510.8	86.1	508.9	162.9	5	337	0.21	3.55	459188	7.19354e+06
509	195.9	515.3	93	515.4	163.2	5	334	0	0.17	459193	7.19354e+06
512.3	198.6	519.8	96.5	518.7	163.3	4	310	0	0.11	459198	7.19354e+06
518.8	204.1	524.3	103.4	525.2	163.6	4	319	0	0.15	459203	7.19354e+06
522.1	209.6	528.8	106.8	528.5	163.8	5	312	0	0.19	459208	7.19354e+06
49.3	114.8	55.6	24.4	65.8	150.2	3	7	0.65	9.31	458713	7.19353e+06
52.5	113.2	60.1	22.1	68.2	150.1	6	132	0.8	5.7	458718	7.19353e+06
55.7	110.1	64.6	19.5	70.7	150	6	178	0.8	8.17	458723	7.19353e+06
62.1	107.3	69.2	14.6	75.9	150.1	2	221	0.89	7.48	458728	7.19353e+06
65.4	106	73.7	12.4	78.6	150.2	6	352	0.73	6.68	458733	7.19353e+06
72	103.6	78.3	9.7	84.1	150.6	2	236	0.59	10.84	458738	7.19353e+06
75.3	101.5	83	7.7	87	150.6	3	323	0.64	13.49	458743	7.19353e+06
81.9	100.6	87.6	3.4	92.8	150.5	4	315	0.41	6.02	458748	7.19353e+06
85.2	99	92.2	3.4	95.7	150.5	3	100	0.85	13.2	458753	7.19353e+06
91.9	97.7	96.9	0	101.8	150.4	4	195	0.63	11.15	458758	7.19353e+06
95.3	96.8	101.6	0	104.8	150.6	2	67	0.72	7.82	458763	7.19353e+06
102	95.3	110.9	3.4	111	150.7	2	24	0.49	10.92	458768	7.19353e+06
105.4	94.2	115.6	4.9	114.1	150.9	1	108	0.53	8.71	458773	7.19353e+06
108.8	93.8	120.2	7.7	117.2	150.9	3	357	0.6	9.7	458778	7.19353e+06
115.5	93.1	124.7	12.4	123.5	150.9	1	54	0.75	10.58	458783	7.19353e+06
118.8	91.8	129.2	14.2	126.7	151	5	293	0.06	0.23	458788	7.19353e+06
125.4	91.2	133.8	17.2	133.1	150.8	2	17	0.07	2.75	458793	7.19353e+06
128.7	90.4	138.3	19.5	136.3	150.8	4	32	0.03	0.23	458798	7.19353e+06
135.1	87.5	142.9	20.7	142.8	151	4	237	0.63	9.02	458803	7.19353e+06
138.4	84.9	147.3	21	146	150.9	1	264	0.52	9.53	458808	7.19353e+06
144.9	79.9	151.8	23.1	152.6	151.1	1	23	0.62	8.7	458813	7.19353e+06
148.2	75	156.3	24.1	155.8	151	3	207	0.68	7.59	458818	7.19353e+06
151.5	72.6	160.7	23.1	159.1	150.9	2	328	0.46	10.7	458823	7.19353e+06
158.1	68	165.2	21	165.7	150.9	1	90	0.31	9.4	458828	7.19353e+06
161.4	63.6	169.8	20.1	169	150.9	1	117	0.05	0.42	458833	7.19353e+06
168	61.6	174.3	17.2	175.5	150.9	3	143	0.08	5.34	458838	7.19353e+06
171.4	57.6	178.8	14.6	178.7	150.9	1	277	0.53	11.38	458843	7.19353e+06
178	54.1	183.4	9.7	185.2	151	3	339	0.5	6.67	458848	7.19353e+06
181.4	51.4	187.9	7.7	188.5	150.9	1	326	0.59	8.22	458853	7.19353e+06
188	45.4	192.5	3.4	195.1	150.9	4	86	0.54	8.1	458858	7.19353e+06
191.4	39.5	201.7	0	198.4	150.7	4	38	0	0.39	458863	7.19353e+06
198.1	36.5	206.3	3.4	205	151	5	292	0.78	10.96	458868	7.19353e+06
201.5	30.6	210.8	4.9	208.3	151	3	277	0.55	8.71	458873	7.19353e+06
204.8	24.7	215.5	6.9	211.6	151.2	1	93	0.81	7.99	458878	7.19353e+06
211.4	21.8	220.1	9.7	218.2	151.1	3	117	0.86	10.06	458883	7.19353e+06
214.7	16.2	224.7	10.3	221.5	151.1	5	329	0.62	8.28	458888	7.19353e+06
221.2	10.8	229.3	12.4	228.2	151.2	1	34	0.8	9.05	458893	7.19353e+06
224.5	8.5	233.9	14.6	231.5	150.9	6	209	0.64	16.68	458898	7.19353e+06
231.1	4.2	238.6	18.6	238.2	149.9	24	66	0.36	5.58	458903	7.19353e+06
234.3	3	243.2	20.1	241.5	149.8	1	126	0.89	15.34	458908	7.19353e+06
297.5	4.2	306.7	20.1	304.3	149.5	0	-1	1	5.21	458973	7.19353e+06
300.8	6	311.3	17.2	307.7	149.5	2	315	1	7.47	458978	7.19353e+06
307.3	8.5	315.8	10.9	314.3	149.5	0	-1	1	6.28	458983	7.19353e+06
310.6	10.8	320.4	7.7	317.6	149.8	22	337	0.23	1.41	458988	7.19353e+06
317.2	12	325	3.4	324.3	150.3	15	341	0.46	5.11	458993	7.19353e+06
320.5	13.4	329.6	0	327.6	151.2	12	263	0.5	8.44	458998	7.19353e+06
327.1	15	334.2	3.4	334.3	152	10	207	0.65	13.07	459003	7.19353e+06
330.4	19.2	338.8	6.9	337.6	152.4	10	195	0.32	7.87	459008	7.19353e+06
337	24.2	343.2	12.4	344.3	152.5	6	223	0.78	10.05	459013	7.19353e+06
340.3	26.8	347.6	14.6	347.5	152.9	3	232	0.67	12.8	459018	7.19353e+06
347	32.3	352	20.1	353.9	153.3	5	122	0.71	14.27	459023	7.19353e+06
350.3	37.9	356.4	23.1	357.1	153.4	8	239	0.47	12.75	459028	7.19353e+06
353.6	40.8	360.9	26.2	360.3	153.7	3	221	0.09	6.32	459033	7.19353e+06
360.3	46.6	365.3	32.7	366.7	154.1	2	235	0.84	14.01	459038	7.19353e+06
363.5	52.4	369.7	34.1	369.9	154.2	0	180	0.24	1.27	459043	7.19353e+06
369.9	55.2	374.2	29.2	376.3	154.6	4	250	0.85	7.22	459048	7.19353e+06
373.1	60.7	383.1	26.9	379.5	154.6	6	116	0.77	7.21	459053	7.19353e+06
379.5	66.4	387.6	23.1	386	154.4	1	174	0.63	3	459058	7.19353e+06
382.7	69.3	392.1	21.8	389.2	154.2	2	62	0.26	5.66	459063	7.19353e+06
389.2	75	396.6	18.6	395.7	154.5	13	237	0.73	13.08	459068	7.19353e+06
392.4	80.8	401.1	17.6	398.9	155.4	4	280	0.53	11.14	459073	7.19353e+06
395.7	83.7	405.6	17.2	402.2	155.7	3	232	0.8	9.45	459078	7.19353e+06
402.2	89.5	410.1	10.9	408.7	155.5	9	9	0.64	5.55	459083	7.19353e+06
405.4	95.3	414.6	7.7	411.9	155.3	10	347	0.36	4.61	459088	7.19353e+06
411.9	98.3	419.1	3.4	418.4	155.7	6	310	0	0.23	459093	7.19353e+06
415.2	104.1	423.7	0	421.7	156	3	346	0	0.1	459098	7.19353e+06
421.7	110	428.2	6.9	428.2	156.3	3	313	0	0.1	459103	7.19353e+06
425	113	432.7	9.7	431.5	156.6	5	259	0	0.19	459108	7.19353e+06
431.5	118.9	437.2	15.4	438.1	157.1	8	257	0	0.3	459113	7.19353e+06
434.8	124.8	441.7	18.6	441.3	157.7	4	273	0	0.14	459118	7.19353e+06
441.3	127.7	446.2	25.1	447.9	158	8	257	0	0.35	459123	7.19353e+06
444.6	133.7	450.7	28.4	451.1	158.8	8	255	0	0.26	459128	7.19353e+06
447.9	139.6	455.2	31.8	454.4	159.5	10	262	0.7	4.09	459133	7.19353e+06
454.4	142.6	459.7	38.5	460.9	160	6	275	0.81	5.54	459138	7.19353e+06
457.7	148.5	464.2	41.9	464.2	160.4	5	263	0.28	4.18	459143	7.19353e+06
464.2	154.4	468.7	48.7	470.8	160.8	4	281	0	0.13	459148	7.19353e+06
467.5	157.4	477.8	52.1	474	161	1	270	0	0.13	459153	7.19353e+06
474	163.4	482.2	59	480.6	161.3	6	298	0	0.21	459158	7.19353e+06
477.3	169.3	486.7	62.4	483.8	161.7	4	297	0	0.14	459163	7.19353e+06
483.9	172.3	491.2	69.3	490.4	162	4	303	0	0.23	459168	7.19353e+06
487.2	178.2	495.7	72.7	493.6	162.4	6	322	0	0.25	459173	7.19353e+06
493.8	184.2	500.2	79.6	500.2	162.8	5	293	0	0.3	459178	7.19353e+06
497.1	187.2	504.8	83	503.4	163	0	90	0.46	4.62	459183	7.19353e+06
500.4	193.1	509.3	86.4	506.7	163.2	4	315	0.59	4.52	459188	7.19353e+06
507	198.6	513.8	93.3	513.3	163.5	3	307	0	0.11	459193	7.19353e+06
510.3	201.2	518.3	96.7	516.6	163.6	5	356	0	0.18	459198	7.19353e+06
516.9	206.6	522.9	103.6	523.2	163.8	4	321	0	0.13	459203	7.19353e+06
520.2	212	527.4	107	526.4	164	5	304	0	0.27	459208	7.19353e+06
526.8	214.8	531.9	113.9	533	164.4	4	302	0	0.09	459213	7.19353e+06
38.5	126.2	45.1	29.6	56.5	150.3	2	99	0.8	8.49	458703	7.19353e+06
41.6	123.1	49.6	26.9	58.7	150.1	4	127	0.84	8.58	458708	7.19353e+06
48	119.9	54.2	22.1	63.4	150	9	136	0.82	9.49	458713	7.19353e+06
51.2	118.3	58.8	19.5	65.8	150	4	149	0.75	5.28	458718	7.19353e+06
54.5	115.4	63.4	17.2	68.4	150	5	339	0.66	5.72	458723	7.19353e+06
61.1	112.7	68	12.4	73.7	150.2	6	269	0.81	6.91	458728	7.19353e+06
64.4	111.5	72.7	9.7	76.5	150.4	1	278	0.84	11.2	458733	7.19353e+06
71	109.2	77.3	6.9	82.2	150.5	4	22	0.88	12.42	458738	7.19353e+06
74.4	107.2	82	4.9	85.1	150.5	5	226	0.9	10.56	458743	7.19353e+06
81.1	106.3	86.7	0	91	150.6	4	175	0.12	14.32	458748	7.19353e+06
84.5	104.8	91.4	0	94.1	150.6	2	309	0.72	6.5	458753	7.19353e+06
91.2	103.4	96.1	0	100.2	150.6	4	297	0.76	15.1	458758	7.19353e+06
94.6	102.6	100.7	0	103.3	150.6	2	57	0.81	12.81	458763	7.19353e+06
101.3	101.2	109.7	4.9	109.5	150.6	1	164	0.66	12.14	458768	7.19353e+06
104.6	100.1	114.2	7.7	112.7	150.8	2	348	0.68	8.24	458773	7.19353e+06
107.9	99.7	118.8	9.7	115.8	150.9	2	318	0.22	3.88	458778	7.19353e+06
114.5	99	123.3	14.6	122.2	150.9	3	279	0.63	9.6	458783	7.19353e+06
117.8	97.7	127.9	17.2	125.4	150.8	3	191	0.47	9.33	458788	7.19353e+06
124.2	97.2	132.3	20.1	131.9	150.9	0	225	0.51	12.11	458793	7.19353e+06
127.5	95.7	136.8	22.1	135.1	151	3	251	0.27	6.09	458798	7.19353e+06
134	90.7	141.2	24.1	141.7	150.9	3	170	0.58	10.71	458803	7.19353e+06
137.3	88.2	145.7	24.4	144.9	150.9	0	349	0.25	6.18	458808	7.19353e+06
143.9	83.4	150.2	26.2	151.5	151	2	138	0.77	12.46	458813	7.19353e+06
147.2	78.7	154.7	27.6	154.8	150.9	1	40	0.52	10.62	458818	7.19353e+06
150.5	76.5	159.3	26.2	158.1	150.9	2	146	0.45	10.49	458823	7.19353e+06
157.2	72.1	163.8	24.4	164.6	150.8	2	34	0.72	8.44	458828	7.19353e+06
160.5	68	168.4	23.1	167.8	150.9	3	45	0.07	5.13	458833	7.19353e+06
167.2	66.1	172.9	19.5	174.3	150.9	3	355	0.43	8.07	458838	7.19353e+06
170.5	61.2	177.5	17.2	177.6	150.9	1	60	0.24	7.59	458843	7.19353e+06
177.2	55.3	182.1	12.4	184.2	151	1	59	0.41	7.29	458848	7.19353e+06
180.5	52.4	186.7	9.7	187.5	151.1	6	238	0.56	7.34	458853	7.19353e+06
187.3	46.6	191.3	3.4	194.1	151.2	2	306	0.78	6.17	458858	7.19353e+06
190.6	40.8	200.5	0	197.4	151.3	3	359	0.63	7.27	458863	7.19353e+06
197.3	37.9	205.1	0	204	150.8	8	48	0.1	3.82	458868	7.19353e+06
200.5	32.3	209.7	3.4	207.3	151	7	211	0.18	8.94	458873	7.19353e+06
203.8	26.8	214.4	3.4	210.6	151.1	4	96	0.86	10.04	458878	7.19353e+06
210.3	24.2	219	6.9	217.3	151.2	2	282	0.81	7.93	458883	7.19353e+06
213.6	19.2	223.6	6.9	220.6	151.1	2	120	0.77	9.08	458888	7.19353e+06
220.2	15	228.3	9.7	227.3	151.1	5	145	0.79	10.36	458893	7.19353e+06
223.4	12.7	232.9	12.4	230.7	151.1	4	308	0.79	11.86	458898	7.19353e+06
230	9.5	237.4	15.4	237.4	150.1	29	53	0.73	10.41	458903	7.19353e+06
233.4	6.7	241.9	17.2	240.7	149.6	5	152	0.15	0.45	458908	7.19353e+06
240	4.2	246.4	20.1	247.4	149.5	3	313	0.89	14.97	458913	7.19353e+06
243.3	4.2	250.9	21.8	250.6	149.5	2	39	0.99	14.71	458918	7.19353e+06
256.6	6	264.4	25.1	263.7	149.5	0	-1	0.5	7.91	458933	7.19353e+06
263.3	0	268.9	27.6	270.3	149.5	0	-1	1	0.53	458938	7.19353e+06
266.6	3	273.5	27.6	273.6	149.5	0	-1	0	0.08	458943	7.19353e+06
273.3	3	278	28.4	280.2	149.5	0	-1	0	0.19	458948	7.19353e+06
276.6	0	282.6	29.4	283.5	149.5	1	18	0	0.1	458953	7.19353e+06
286.6	3	296.3	27.8	293.5	149.5	2	286	0.57	1.23	458963	7.19353e+06
296.4	9.5	305.4	18.6	303.4	149.6	7	296	0.5	4.71	458973	7.19353e+06
299.7	12	310	15.4	306.8	150.6	21	316	0.28	4.7	458978	7.19353e+06
306.3	13.4	314.6	9.7	313.4	151.2	7	359	0.41	10.33	458983	7.19353e+06
309.6	15	319.2	6.9	316.8	151.8	8	326	0.46	13.79	458988	7.19353e+06
316.2	18	323.8	0	323.4	151.2	7	51	0.19	5.78	458993	7.19353e+06
319.5	19	328.2	0	326.8	151.7	16	331	0.73	14.7	458998	7.19353e+06
326.1	20.1	332.6	3.4	333.5	151.9	7	338	0.5	13.94	459003	7.19353e+06
329.4	23.4	337	6.9	336.6	152.4	6	333	0.62	15.18	459008	7.19353e+06
336.1	27.7	341.4	13.8	343	152.5	3	263	0.28	13.95	459013	7.19353e+06
339.4	30	345.8	17.2	346.2	153	4	290	0.07	0.44	459018	7.19353e+06
346	35	350.3	22.1	352.6	153.3	4	304	0.49	11.45	459023	7.19353e+06
349.4	40.2	354.7	24.8	355.8	153.5	5	305	0.51	4.97	459028	7.19353e+06
352.6	43	359.2	27.8	359	154.1	7	323	0.58	7.25	459033	7.19353e+06
359	48.5	363.7	33.9	365.4	154.5	2	327	0.73	4.87	459038	7.19353e+06
362.2	54.1	368.1	31.8	368.6	154.6	4	62	0.73	4.49	459043	7.19353e+06
368.6	56.9	372.6	26.9	375.1	154.3	3	162	0.05	1.33	459048	7.19353e+06
371.8	62.6	381.6	24.4	378.3	154.3	1	150	0.27	0.74	459053	7.19353e+06
378.3	68.4	386.1	20.1	384.8	154.3	3	124	0.15	7.16	459058	7.19353e+06
381.5	71.3	390.6	18.6	388	154.5	12	345	0.46	7.06	459063	7.19353e+06
388	76.9	395.1	15.4	394.5	155.1	15	348	0.51	3.65	459068	7.19353e+06
391.3	82.5	399.6	14.2	397.8	155	19	25	0.27	2.78	459073	7.19353e+06
394.5	85.4	404.1	13.8	401	155.3	12	296	0.75	5.87	459078	7.19353e+06
401	91.1	408.7	9.7	407.5	156.1	9	315	0.64	4.65	459083	7.19353e+06
404.3	96.8	413.2	6.9	410.8	156.4	4	39	0.91	4.83	459088	7.19353e+06
410.8	99.7	417.7	0	417.3	156.1	7	349	0	0.21	459093	7.19353e+06
414.1	105.5	422.2	0	420.6	156.3	5	4	0	0.14	459098	7.19353e+06
420.6	111.3	426.6	6.9	427.2	156.6	6	345	0	0.22	459103	7.19353e+06
423.9	114.2	431.1	10.3	430.5	156.6	3	328	0	0.11	459108	7.19353e+06
430.5	120.1	435.6	17.2	437	156.9	6	258	0	0.16	459113	7.19353e+06
433.7	125.9	440.2	20.1	440.2	157.5	8	268	0	0.31	459118	7.19353e+06
440.2	128.9	444.7	26.2	446.8	158	4	283	0	0.18	459123	7.19353e+06
443.5	134.7	449.2	29.4	450	158.8	10	273	0	0.37	459128	7.19353e+06
446.8	140.6	453.7	32.7	453.3	159.4	7	266	0.07	1.67	459133	7.19353e+06
453.3	143.6	458.2	39.3	459.9	160	4	259	0.61	6.24	459138	7.19353e+06
456.6	149.5	462.7	42.6	463.1	160.4	3	284	0.86	6.32	459143	7.19353e+06
463.1	155.4	467.2	49.3	469.7	160.7	5	256	0	0.19	459148	7.19353e+06
466.4	158.3	476.2	52.7	472.9	161.1	4	293	0	0.1	459153	7.19353e+06
473	164.2	480.7	59.5	479.5	161.5	5	286	0	0.2	459158	7.19353e+06
476.3	170.2	485.2	62.9	482.7	161.8	4	300	0	0.19	459163	7.19353e+06
482.9	173.1	489.7	69.7	489.3	162.2	5	303	0	0.18	459168	7.19353e+06
486.2	179	494.3	73.1	492.5	162.7	7	283	0	0.22	459173	7.19353e+06
492.8	185	498.8	79.9	499.1	163.1	5	313	0	0.15	459178	7.19353e+06
496.1	187.9	503.3	83.3	502.4	163.3	5	337	0	0.12	459183	7.19353e+06
499.4	193.9	507.8	86.8	505.7	163.5	4	292	0	0.16	459188	7.19353e+06
506	199.8	512.4	93.6	512.3	163.7	4	314	0	0.22	459193	7.19353e+06
509.3	202.8	516.9	97	515.6	163.9	1	290	0.24	4.22	459198	7.19353e+06
515.9	208.8	521.5	103.9	522.1	164.1	4	328	0.6	5.62	459203	7.19353e+06
519.2	214.7	526	107.3	525.4	164.3	2	342	0.5	4.75	459208	7.19353e+06
525.9	217.4	530.5	114.2	532	164.5	4	322	0	0.19	459213	7.19353e+06
29.4	130.3	39.2	32.7	46.9	149.9	7	159	0.86	8.73	458698	7.19352e+06
36	128.8	43.8	26.2	51.2	149.8	8	169	0.65	6.14	458703	7.19352e+06
39.3	125.6	48.4	23.1	53.6	149.7	6	147	0.84	6.04	458708	7.19352e+06
46	122.5	53.1	17.2	58.7	149.7	5	224	0.7	3.81	458713	7.19352e+06
49.3	120.9	57.8	14.6	61.4	149.9	5	308	0.89	4.8	458718	7.19352e+06
52.7	118.1	62.5	12.4	64.1	150.2	4	240	0.74	6.44	458723	7.19352e+06
59.5	115.5	67.2	7.7	69.8	150.2	1	101	0.87	10.3	458728	7.19352e+06
62.9	114.2	71.9	4.9	72.7	150.2	7	217	0.83	10.36	458733	7.19352e+06
69.7	112	76.6	0	78.7	150.3	5	148	0.94	13.78	458738	7.19352e+06
73	110.1	81.2	0	81.7	150.1	3	252	0.51	6.46	458743	7.19352e+06
79.6	109.2	85.6	3.4	87.9	150.6	4	186	0.94	14.53	458748	7.19352e+06
82.8	107.7	90.1	3.4	91	150.5	4	134	0.85	13.74	458753	7.19352e+06
89.5	106.3	94.7	0	97.3	150.5	4	255	0.32	8.15	458758	7.19352e+06
92.8	105.5	99.2	0	100.5	150.7	3	245	0.89	11.99	458763	7.19352e+06
99.2	104.1	108.3	6.9	106.9	150.7	3	313	0.71	12.35	458768	7.19352e+06
102.5	103.1	112.9	10.3	110.1	150.7	1	117	0.35	6.77	458773	7.19352e+06
105.7	102.7	117.3	13.8	113.3	150.9	3	241	0.54	4.61	458778	7.19352e+06
112.2	101.9	121.8	19.5	119.9	150.9	2	264	0.27	6.2	458783	7.19352e+06
115.5	100.6	126.2	22.1	123.1	150.9	2	24	0.7	10.58	458788	7.19352e+06
122.1	100.1	130.7	26.2	129.7	150.9	4	321	0.69	14.81	458793	7.19352e+06
125.4	97.3	135.2	27.8	133	151	4	184	0.69	12.88	458798	7.19352e+06
132.1	92.4	139.7	31	139.5	150.8	1	239	0.25	11.53	458803	7.19352e+06
135.4	90	144.2	31.2	142.8	151	1	127	0.58	12.5	458808	7.19352e+06
142.1	85.3	148.8	32.7	149.3	150.9	0	315	0.58	8.07	458813	7.19352e+06
145.4	80.7	153.3	33.9	152.6	150.9	3	309	0.12	10.22	458818	7.19352e+06
148.8	78.5	157.9	32.7	155.8	151	2	248	0.59	10.35	458823	7.19352e+06
155.5	74.3	162.5	30.8	162.4	150.9	2	222	0.33	6.98	458828	7.19352e+06
158.8	70.3	167.1	29.2	165.7	151	2	145	0.16	0.91	458833	7.19352e+06
165.6	67.7	171.7	24.4	172.3	150.9	1	254	0.5	8.72	458838	7.19352e+06
169	61.8	176.3	21.8	175.6	151	1	338	0.63	9.75	458843	7.19352e+06
175.5	56	180.9	15.4	182.2	150.9	1	207	0.87	8.83	458848	7.19352e+06
178.7	53.2	185.5	12.4	185.6	151	3	330	0.7	7.38	458853	7.19352e+06
185.2	47.4	190.1	7.7	192.2	151	5	282	0.77	8.26	458858	7.19352e+06
188.5	41.8	199.4	4.9	195.6	151.2	3	180	0.63	7.08	458863	7.19352e+06
195.1	39	204.1	3.4	202.3	151.1	2	196	0.85	8.42	458868	7.19352e+06
198.4	33.5	208.7	0	205.6	151.2	10	38	0.2	8.12	458873	7.19352e+06
201.7	28.3	213.4	0	208.9	150.9	7	198	0.41	8.42	458878	7.19352e+06
208.3	25.8	218	0	215.7	151.1	5	172	0.84	10.13	458883	7.19352e+06
211.6	21.2	222.4	0	219	150.9	0	153	0.82	10.97	458888	7.19352e+06
218.2	17	226.9	4.9	225.6	150.8	4	78	0.73	10.54	458893	7.19352e+06
221.5	15	231.4	6.9	228.8	151.2	3	231	0.91	10.93	458898	7.19352e+06
228.2	12.4	235.9	9.7	235.4	151.1	3	47	0.84	12.04	458903	7.19352e+06
231.5	8.5	240.4	10.9	238.7	150.3	26	75	0.05	0.67	458908	7.19352e+06
238.2	6.7	244.9	14.2	245.2	150	14	304	0.81	12.39	458913	7.19352e+06
241.5	6.7	249.4	15.4	248.5	149.9	20	57	0.89	12.44	458918	7.19352e+06
248.2	6	253.9	17.2	255.1	149.8	15	284	0.74	8.24	458923	7.19352e+06
251.6	6.7	258.5	17.6	258.4	150.4	25	12	0.91	10.1	458928	7.19352e+06
254.9	6.7	263	18.6	261.7	150.2	25	15	0.68	7.95	458933	7.19352e+06
261.5	3	267.6	20.7	268.4	149.7	8	55	0.91	10.38	458938	7.19352e+06
264.8	4.2	272.1	20.7	271.7	149.5	4	304	0.57	1.24	458943	7.19352e+06
271.3	6	276.7	21.8	278.3	149.7	1	255	0.69	1.56	458948	7.19352e+06
274.6	3	281.2	23.1	281.7	149.9	13	19	0.07	2.37	458953	7.19352e+06
281.2	3	290.4	24.1	288.3	149.6	7	338	0.29	2.93	458958	7.19352e+06
284.5	4.2	295	23.1	291.7	149.9	6	356	0.07	2.86	458963	7.19352e+06
291.1	9.5	299.6	18.6	298.4	149.9	15	336	0.18	2.86	458968	7.19352e+06
294.4	12.4	304.2	15.4	301.7	150.3	23	316	0.35	12.6	458973	7.19352e+06
297.7	15	308.8	12.4	305	151.9	12	326	0.72	8.22	458978	7.19352e+06
304.3	16.2	313.2	6.9	311.7	152.1	6	339	0.79	10.92	458983	7.19352e+06
307.7	17.5	317.6	3.4	314.9	152.3	2	68	0.78	13.86	458988	7.19352e+06
314.3	21	322	0	321.3	151.9	8	335	0.11	2.57	458993	7.19352e+06
317.6	21.8	326.4	3.4	324.4	152.5	6	307	0.79	13.99	458998	7.19352e+06
324.3	22.8	330.8	7.7	330.8	152.3	7	56	0.64	10.22	459003	7.19352e+06
327.6	25.8	335.3	9.7	334	152.3	7	290	0.41	8.79	459008	7.19352e+06
334	29.7	339.7	15.4	340.4	152.8	2	34	0.65	15.31	459013	7.19352e+06
337.2	31.9	344.2	18.6	343.6	153.2	3	295	0.62	12.72	459018	7.19352e+06
343.6	36.6	348.6	25.1	350.1	153.4	2	320	0.75	19.04	459023	7.19352e+06
346.9	41.7	353.1	28.4	353.3	153.8	6	271	0.15	1.06	459028	7.19352e+06
350.1	44.3	357.6	31.8	356.5	154.1	4	293	0.59	5.86	459033	7.19352e+06
356.5	49.7	362.1	29.2	363	154.6	5	288	0.77	7.89	459038	7.19352e+06
359.8	55.2	366.6	26.9	366.2	154.5	6	96	0.64	5.18	459043	7.19352e+06
366.2	57.9	371.1	22.1	372.7	154.3	1	50	0	0.1	459048	7.19352e+06
376	69.3	384.6	14.6	382.5	154.5	9	304	0.55	11.11	459058	7.19352e+06
379.2	72.1	389.1	12.4	385.7	155.4	15	280	0.71	8.53	459063	7.19352e+06
385.7	77.9	393.6	9.7	392.3	156	4	308	0.08	7.26	459068	7.19352e+06
389	83.6	398.2	7.7	395.6	156	5	38	0.54	3.1	459073	7.19352e+06
392.3	86.4	402.6	6.9	398.8	156.1	19	318	0.53	7.14	459078	7.19352e+06
398.8	92	407.1	4.9	405.4	156.8	11	325	0.07	3.46	459083	7.19352e+06
402.1	97.7	411.6	3.4	408.7	157.2	10	40	0.62	5.5	459088	7.19352e+06
408.7	100.6	416.1	0	415.2	156.9	8	12	0	0.25	459093	7.19352e+06
411.9	106.3	420.6	3.4	418.4	156.9	9	329	0	0.27	459098	7.19352e+06
418.4	112.1	425.1	7.7	425	157	5	348	0.03	0.28	459103	7.19352e+06
421.7	115	429.7	10.9	428.2	157	7	355	0	0.24	459108	7.19352e+06
428.2	120.8	434.2	17.6	434.8	157.1	7	350	0	0.23	459113	7.19352e+06
431.5	126.6	438.7	21	438.1	157.5	10	282	0	0.28	459118	7.19352e+06
438.1	129.5	443.2	27.8	444.6	158.2	5	304	0	0.2	459123	7.19352e+06
441.3	135.4	447.7	31.2	447.9	158.7	8	281	0	0.28	459128	7.19352e+06
444.6	141.2	452.2	34.6	451.1	159.3	5	257	0	0.22	459133	7.19352e+06
451.2	144.2	456.7	41.5	457.7	159.8	4	252	0.56	6.05	459138	7.19352e+06
454.5	150	461.2	44.8	460.9	160.3	4	256	0.63	6.28	459143	7.19352e+06
461.1	155.9	465.7	51.2	467.5	160.6	6	276	0	0.2	459148	7.19352e+06
464.4	158.9	474.7	54.5	470.8	161.2	5	283	0	0.19	459153	7.19352e+06
471	164.8	479.2	61.1	477.3	161.6	5	282	0	0.19	459158	7.19352e+06
474.3	170.7	483.8	64.4	480.6	162.1	5	291	0	0.17	459163	7.19352e+06
480.9	173.6	488.3	71	487.2	162.3	4	298	0	0.24	459168	7.19352e+06
484.2	179.5	492.8	74.4	490.5	162.8	6	285	0	0.2	459173	7.19352e+06
490.8	185.4	497.4	81.1	497.1	163.3	4	295	0	0.15	459178	7.19352e+06
494.2	188.4	501.9	84.5	500.4	163.5	3	293	0	0.15	459183	7.19352e+06
497.5	194.3	506.4	87.9	503.7	163.7	4	298	0	0.18	459188	7.19352e+06
504.1	200.3	511	94.6	510.3	163.9	3	324	0.75	4.63	459193	7.19352e+06
507.4	203.2	515.5	98	513.6	164.2	5	308	0	0.13	459198	7.19352e+06
514.1	209.2	520.1	104.8	520.2	164.4	4	321	0	0.17	459203	7.19352e+06
517.4	215.1	524.6	108.2	523.5	164.5	3	1	0.16	3.95	459208	7.19352e+06
524.1	218.1	529.2	115	530.1	164.6	5	303	0	0.16	459213	7.19352e+06
527.4	224	533.8	118.4	533.4	165	2	275	0	0.09	459218	7.19352e+06
18.6	141.5	28.9	41.9	38.5	149.7	1	190	0.71	8.59	458688	7.19352e+06
25.1	138.4	33.6	35.1	42.1	149.7	1	108	0.65	8.92	458693	7.19352e+06
28.4	135.5	38.3	31.8	44.1	149.4	7	165	0.29	4.06	458698	7.19352e+06
35.1	134	43	25.1	48.7	149.3	2	170	0	0.15	458703	7.19352e+06
38.5	130.7	47.7	21.8	51.2	149.6	9	285	0.3	1.58	458708	7.19352e+06
45.3	127.6	52.5	15.4	56.5	149.8	4	351	0.82	6.63	458713	7.19352e+06
48.7	126.2	57.2	12.4	59.3	149.9	4	259	0.73	8.46	458718	7.19352e+06
52.1	123.4	61.8	9.7	62.1	150	1	40	0.87	8.74	458723	7.19352e+06
58.9	120.9	66.2	4.9	68	150.2	2	180	0.93	7.92	458728	7.19352e+06
62.1	119.8	70.6	3.4	71	150.2	6	145	0.28	3.42	458733	7.19352e+06
68.7	117.7	75.1	0	77.1	150.1	6	289	0.11	2.21	458738	7.19352e+06
72	115.8	79.6	0	80.1	150.3	3	225	0.83	11.68	458743	7.19352e+06
78.6	115	84.2	4.9	86.4	150.4	2	307	0.82	10.32	458748	7.19352e+06
81.9	113.6	88.7	6.9	89.6	150.5	2	286	0.71	9.81	458753	7.19352e+06
88.3	112.1	93.3	0	96	150.3	0	333	0.46	7.52	458758	7.19352e+06
91.6	111.3	97.9	3.4	99.2	150.6	4	130	0.7	9.19	458763	7.19352e+06
98.1	110	106.8	7.7	105.7	150.6	3	230	0.7	8.73	458768	7.19352e+06
101.3	109	111.2	10.9	109	150.7	1	108	0.89	9.04	458773	7.19352e+06
104.6	108.7	115.7	14.2	112.2	150.7	3	239	0.88	11.93	458778	7.19352e+06
111.2	107.7	120.2	21	118.8	150.9	2	337	0.94	13.63	458783	7.19352e+06
114.5	106.5	124.7	24.4	122.1	150.7	3	188	0.48	6.66	458788	7.19352e+06
121.2	105.7	129.2	29.2	128.7	150.8	2	155	0.84	5.25	458793	7.19352e+06
124.5	100.8	133.8	30.8	131.9	150.9	1	257	0.75	5.58	458798	7.19352e+06
131.2	96	138.3	34.5	138.4	150.9	1	201	0.38	5.5	458803	7.19352e+06
134.6	93.7	142.9	34.6	141.7	150.9	2	48	0.65	11.11	458808	7.19352e+06
141.3	89.2	147.5	36	148.2	150.9	5	274	0.68	12.67	458813	7.19352e+06
144.6	84.9	152.1	37.1	151.5	151	1	320	0.73	7.26	458818	7.19352e+06
148	82.8	156.7	36	154.8	150.9	3	279	0.52	7.08	458823	7.19352e+06
154.8	77.9	161.3	33.9	161.4	151	1	315	0.64	12.35	458828	7.19352e+06
158.1	72.1	165.9	31.8	164.7	151	1	3	0.68	7.93	458833	7.19352e+06
164.6	69.3	170.6	26.2	171.4	151.1	5	356	0.2	1.81	458838	7.19352e+06
167.8	63.6	175.2	23.1	174.7	151.1	1	11	0.7	4.17	458843	7.19352e+06
174.3	57.9	179.8	17.2	181.4	151	1	28	0.65	6.84	458848	7.19352e+06
177.6	55.2	184.5	14.6	184.7	151	2	352	0.66	7.98	458853	7.19352e+06
184.2	49.7	189.1	9.7	191.4	150.9	5	350	0.64	7.13	458858	7.19352e+06
187.5	44.3	198.4	7.7	194.7	150.9	4	169	0.45	6.59	458863	7.19352e+06
194.1	41.7	202.9	4.9	201.5	151.1	5	265	0.72	6.88	458868	7.19352e+06
197.4	36.6	207.4	3.4	204.8	151.2	2	288	0.87	7.4	458873	7.19352e+06
200.7	31.9	211.9	0	208.2	151.3	5	28	0.67	7.84	458878	7.19352e+06
207.3	29.7	216.3	0	214.7	151.2	7	55	0.45	7.88	458883	7.19352e+06
210.6	25.5	220.8	0	217.9	151	9	26	0.13	1.94	458888	7.19352e+06
217.3	21.6	225.3	3.4	224.5	150.7	2	352	0.14	8.04	458893	7.19352e+06
220.6	20.1	229.8	3.4	227.8	150.8	5	204	0.02	3.8	458898	7.19352e+06
227.3	17	234.4	6.9	234.3	151.1	4	245	0.82	15.76	458903	7.19352e+06
230.7	13.4	238.9	7.7	237.6	150.4	24	73	0.46	4.16	458908	7.19352e+06
237.4	12.4	243.4	10.9	244.2	151	7	236	0.04	2.35	458913	7.19352e+06
240.7	12.4	248	12.4	247.5	151.3	3	53	0.51	3.99	458918	7.19352e+06
247.4	12	252.5	13.8	254.2	151.2	10	340	0.81	3.74	458923	7.19352e+06
250.6	12.4	257.1	14.2	257.5	151.3	5	250	0.93	10.16	458928	7.19352e+06
253.9	10.8	261.7	15.4	260.8	151.2	2	38	0.88	7.25	458933	7.19352e+06
260.5	9	266.2	17.2	267.5	150.3	24	49	0.69	12.57	458938	7.19352e+06
263.7	9.5	270.8	17.2	270.8	149.7	20	292	0.32	3.47	458943	7.19352e+06
270.3	10.8	275.4	18.6	277.5	150.2	21	3	0.57	7.18	458948	7.19352e+06
273.6	9	280	20.1	280.8	150.6	8	6	0.27	2.16	458953	7.19352e+06
280.2	9	289.2	20.7	287.5	150.5	10	16	0.38	3.98	458958	7.19352e+06
283.5	9.5	293.8	20.1	290.8	150.8	13	314	0.42	5.86	458963	7.19352e+06
290.1	12.7	298.2	17.2	297.5	151.4	11	316	0.43	10.85	458968	7.19352e+06
293.5	15	302.6	14.2	300.8	151.9	10	345	0.77	4.89	458973	7.19352e+06
296.8	20.1	307	10.9	304	152.1	3	324	0.54	12.74	458978	7.19352e+06
303.4	21.8	311.4	4.9	310.4	152.4	1	235	0.75	16.43	458983	7.19352e+06
306.8	22.8	315.8	3.4	313.6	152.2	7	72	0.4	13.6	458988	7.19352e+06
313.4	25.8	320.3	0	319.9	152.2	7	300	0	0.27	458993	7.19352e+06
316.8	27.7	324.7	3.4	323.1	152.7	2	185	0.66	7.44	458998	7.19352e+06
323.1	28.5	329.2	9.7	329.5	152.6	7	114	0.16	4.34	459003	7.19352e+06
326.3	30.9	333.6	12.4	332.8	152.4	3	313	0.33	5.74	459008	7.19352e+06
332.8	34.2	338.1	17.2	339.2	153	6	284	0.57	4.19	459013	7.19352e+06
336	36.1	342.6	20.1	342.4	153.3	6	314	0.24	2.33	459018	7.19352e+06
342.4	40.4	347	26.2	348.9	153.8	9	336	0.19	4.68	459023	7.19352e+06
345.6	45	351.5	29.4	352.1	153.9	7	340	0.83	5.47	459028	7.19352e+06
348.9	47.4	356	32.5	355.3	154.1	5	262	0.69	3.74	459033	7.19352e+06
355.3	52.5	360.5	26.9	361.8	154.4	6	208	0.57	8.79	459038	7.19352e+06
358.6	57.7	365	24.4	365.1	154.5	5	327	0.78	3.29	459043	7.19352e+06
365.1	60.4	369.6	19.5	371.6	154.3	2	40	0.29	1.94	459048	7.19352e+06
368.3	65.8	378.6	17.2	374.9	154.5	9	350	0.7	10.57	459053	7.19352e+06
374.9	71.3	383.1	12.4	381.4	154.6	11	306	0.02	1.97	459058	7.19352e+06
378.1	74.1	387.6	9.7	384.7	155.3	5	294	0.04	8.18	459063	7.19352e+06
384.7	79.7	392.1	6.9	391.2	155.6	4	261	0	0.27	459068	7.19352e+06
387.9	85.4	396.6	4.9	394.5	156.2	7	295	0	0.22	459073	7.19352e+06
391.2	88.2	401.1	3.4	397.8	156.6	6	309	0	0.17	459078	7.19352e+06
397.8	94	405.6	3.4	404.3	157.1	5	270	0	0.15	459083	7.19352e+06
401	99.7	410.1	0	407.5	157.5	5	299	0	0.21	459088	7.19352e+06
407.5	102.5	414.6	0	414.1	157.5	7	19	0	0.19	459093	7.19352e+06
410.8	108.2	419.1	3.4	417.3	157.6	9	339	0	0.24	459098	7.19352e+06
417.3	113.8	423.7	9.7	423.9	157.6	8	2	0.03	0.21	459103	7.19352e+06
420.6	116.7	428.2	12.4	427.2	157.7	7	357	0	0.18	459108	7.19352e+06
427.2	122.4	432.7	18.6	433.7	157.7	4	342	0.06	0.33	459113	7.19352e+06
430.5	128.2	437.2	21.8	437	158	11	306	0.03	0.37	459118	7.19352e+06
437	131	441.7	28.4	443.5	158.6	7	303	0	0.2	459123	7.19352e+06
440.3	136.8	446.2	31.8	446.8	159	6	329	0	0.19	459128	7.19352e+06
443.6	142.6	450.7	35.1	450	159.3	4	289	0	0.15	459133	7.19352e+06
450.2	145.5	455.2	41.9	456.6	159.7	5	271	0	0.21	459138	7.19352e+06
453.5	151.3	459.7	45.3	459.9	160.2	7	265	0	0.19	459143	7.19352e+06
460.1	157.2	464.2	52.1	466.4	160.7	5	264	0	0.26	459148	7.19352e+06
463.4	160.1	473.3	55.6	469.7	161.1	5	273	0	0.16	459153	7.19352e+06
470	166	477.8	62.1	476.3	161.6	6	280	0	0.19	459158	7.19352e+06
473.3	171.8	482.3	65.4	479.6	162	6	277	0	0.2	459163	7.19352e+06
479.9	174.7	486.9	72	486.2	162.5	5	265	0	0.23	459168	7.19352e+06
483.3	180.6	491.4	75.3	489.5	163	4	256	0	0.21	459173	7.19352e+06
489.9	186.5	496	81.9	496.1	163.4	2	281	0	0.14	459178	7.19352e+06
493.2	189.5	500.5	85.2	499.4	163.6	3	351	0	0.12	459183	7.19352e+06
496.5	195.3	505.1	88.6	502.7	163.8	2	315	0	0.09	459188	7.19352e+06
503.2	201.2	509.6	95.3	509.3	164.1	3	298	0.06	1.94	459193	7.19352e+06
506.5	204.2	514.2	98.7	512.6	164.4	5	272	0	0.08	459198	7.19352e+06
513.2	210.1	518.8	105.4	519.2	164.6	3	287	0	0.15	459203	7.19352e+06
516.5	216	523.3	108.8	522.6	164.8	4	323	0.09	1.54	459208	7.19352e+06
523.2	219	527.9	115.6	529.2	164.9	3	328	0	0.15	459213	7.19352e+06
526.3	224.9	532.5	119	532.5	165.1	4	297	0.59	5.82	459218	7.19352e+06
6.9	151.4	19	51.7	28.4	149.2	8	233	0	0.52	458678	7.19351e+06
13.8	148.2	23.8	44.8	30.8	149.5	6	177	0.06	0.44	458683	7.19351e+06
17.2	146.6	28.5	41.4	32.5	149.5	10	158	0	0.41	458688	7.19351e+06
24.1	143.7	33.3	34.5	36.6	149.3	2	191	0	0.14	458693	7.19351e+06
27.6	140.6	38	31	39	149.1	1	315	0.24	1.45	458698	7.19351e+06
33.9	139	42.5	24.1	44.1	149.4	8	342	0.41	2.46	458703	7.19351e+06
37.1	135.8	46.8	20.7	46.9	149.6	3	253	0.62	2.98	458708	7.19351e+06
43.6	132.9	51.2	13.8	52.6	149.6	7	189	0.62	7.79	458713	7.19351e+06
46.9	131.5	55.6	10.3	55.6	149.7	5	228	0.82	10.55	458718	7.19351e+06
50.2	128.9	60.1	6.9	58.6	149.8	2	155	0.91	10.76	458723	7.19351e+06
56.8	126.5	64.6	0	64.7	150	5	119	0.38	2.39	458728	7.19351e+06
60.2	125.4	69.2	0	67.9	150.1	5	302	0.62	7.08	458733	7.19351e+06
66.6	123.3	73.7	0	74.2	150	3	111	0.27	8.91	458738	7.19351e+06
69.8	121.6	78.3	0	77.4	150.4	1	36	0.85	9.8	458743	7.19351e+06
76.3	120.8	83	3.4	83.9	150.4	0	90	0.19	6.01	458748	7.19351e+06
79.6	119.4	87.3	4.9	87.2	150.4	4	60	0.85	8.34	458753	7.19351e+06
86.1	117.9	91.7	0	93.7	150.4	4	105	0.63	7.97	458758	7.19351e+06
89.5	117.2	96.2	0	97	150.4	4	274	0.87	10.04	458763	7.19351e+06
96.1	115.9	105.2	6.9	103.7	150.6	2	260	0.54	6.78	458768	7.19351e+06
99.5	115	109.7	9.7	106.9	150.7	4	154	0.94	10.22	458773	7.19351e+06
102.8	114.6	114.2	12.4	110.1	150.7	3	282	0.76	7.32	458778	7.19351e+06
109.5	113.6	118.8	17.2	116.6	150.9	5	63	0.87	11.38	458783	7.19351e+06
112.9	111.6	123.3	20.1	119.9	150.7	2	242	0.75	10.29	458788	7.19351e+06
119.6	109.2	127.9	26.2	126.4	150.9	3	273	0.86	10.86	458793	7.19351e+06
123	104.5	132.5	29.4	129.7	150.8	2	130	0.88	11.78	458798	7.19351e+06
129.8	99.9	137.1	35.5	136.3	150.8	2	290	0.95	8.4	458803	7.19351e+06
133.1	97.7	141.7	38.5	139.6	150.9	3	96	0.73	10.02	458808	7.19351e+06
139.5	93.3	146.3	42.6	146.3	150.8	3	137	0.52	9.75	458813	7.19351e+06
142.8	88.2	151	43.6	149.6	150.9	1	135	0.83	9.87	458818	7.19351e+06
146	85.4	155.6	42.6	152.9	151	2	190	0.73	9.09	458823	7.19351e+06
152.6	79.7	160.3	38.5	159.6	151.1	2	172	0.6	8.35	458828	7.19351e+06
155.8	74.1	164.9	35.5	163	151	3	311	0.85	9.19	458833	7.19351e+06
162.4	71.3	169.6	29.6	169.7	151.1	1	270	0.38	1.84	458838	7.19351e+06
165.7	65.8	174.2	26.9	173	151	3	351	0.8	9.82	458843	7.19351e+06
172.3	60.4	178.9	22.1	179.8	151	3	231	0.73	7.63	458848	7.19351e+06
175.6	57.7	183.5	19.5	183.1	151.1	2	236	0.56	8.9	458853	7.19351e+06
182.2	52.5	187.9	15.4	189.6	151	1	281	0.69	9.18	458858	7.19351e+06
185.6	47.4	196.8	14.2	192.9	151.1	3	29	0.94	8.1	458863	7.19351e+06
192.2	45	201.3	9.7	199.4	150.9	2	215	0.72	8.27	458868	7.19351e+06
195.6	40.4	205.8	7.7	202.7	151.1	3	217	0.78	7.59	458873	7.19351e+06
198.9	36.1	210.3	6.9	206	151.3	4	179	0.73	6.12	458878	7.19351e+06
205.6	33.9	214.8	4.9	212.6	151.3	5	127	0.73	7.29	458883	7.19351e+06
208.9	30	219.3	3.4	215.9	151.1	4	171	0.75	10.06	458888	7.19351e+06
215.7	26.8	223.9	0	222.5	151	3	215	0.76	10.02	458893	7.19351e+06
219	25.5	228.4	0	225.8	151.1	1	285	0.63	7.2	458898	7.19351e+06
225.6	21.6	233	0	232.4	151	8	25	0.3	1.95	458903	7.19351e+06
228.8	19	237.5	3.4	235.7	151	7	329	0.51	10.21	458908	7.19351e+06
235.4	18.2	242.1	4.9	242.4	151	3	23	0.56	5.02	458913	7.19351e+06
238.7	18.2	246.7	6.9	245.7	151.1	1	215	0.41	5.1	458918	7.19351e+06
245.2	18	251.2	6.9	252.4	151.2	4	360	0.64	9.1	458923	7.19351e+06
248.5	18.2	255.8	7.7	255.7	151.4	7	325	0.71	7.6	458928	7.19351e+06
251.8	16.2	260.4	9.7	259.1	151.4	5	17	0.61	10.08	458933	7.19351e+06
258.4	15	265	10.3	265.8	151.5	10	41	0.78	8.85	458938	7.19351e+06
261.7	15.3	269.6	10.3	269.1	151.5	15	352	0.8	10.94	458943	7.19351e+06
268.4	16.2	274.2	12.4	275.7	151.6	9	5	0.61	15.37	458948	7.19351e+06
271.7	15	278.8	13.8	279	151.4	6	357	0.03	1.51	458953	7.19351e+06
278.3	15	287.6	13.8	285.5	151.2	11	337	0.29	6.55	458958	7.19351e+06
281.7	15.3	292	13.8	288.7	151.5	8	329	0.43	7.27	458963	7.19351e+06
288.3	17.5	296.4	10.9	295	152.1	6	318	0.77	10.47	458968	7.19351e+06
291.7	19.2	300.8	9.7	298.2	152.3	3	355	0.82	6.25	458973	7.19351e+06
295	23.4	305.3	7.7	301.4	152.3	5	51	0.76	10.39	458978	7.19351e+06
301.4	27.7	309.7	3.4	307.8	152.3	3	311	0.8	9.94	458983	7.19351e+06
304.6	28.5	314.1	0	311	152.4	3	334	0.24	4.57	458988	7.19351e+06
311	30.9	318.6	3.4	317.4	152.5	7	341	0.26	4.51	458993	7.19351e+06
314.2	33.5	323.1	6.9	320.6	152.8	14	354	0.71	3.73	458998	7.19351e+06
320.6	34.2	327.5	12.4	327.1	152.8	2	111	0.45	11.3	459003	7.19351e+06
323.9	36.2	332	15.4	330.3	152.9	2	20	0.77	16.55	459008	7.19351e+06
330.3	39.1	336.5	21.8	336.8	153	5	245	0.34	14.69	459013	7.19351e+06
333.6	40.8	341	24.4	340	153.4	6	229	0.69	9.7	459018	7.19351e+06
340	44.6	345.5	29.6	346.5	153.9	4	222	0.75	10.6	459023	7.19351e+06
343.3	48.8	350	31.8	349.8	154.2	4	232	0.92	11.15	459028	7.19351e+06
346.5	51.1	354.5	29.2	353.1	154.6	5	224	0.77	8.7	459033	7.19351e+06
353.1	55.8	359.1	23.1	359.6	154.2	7	165	0.61	8.57	459038	7.19351e+06
356.3	60.7	363.6	20.1	362.9	154.4	7	182	0.7	10.18	459043	7.19351e+06
362.9	63.3	368.1	14.6	369.4	154.4	9	157	0.21	2.64	459048	7.19351e+06
366.1	68.5	377.1	12.4	372.7	154.7	10	243	0.14	6.36	459053	7.19351e+06
372.7	73.8	381.6	7.7	379.2	155.2	4	5	0.03	0.34	459058	7.19351e+06
376	76.5	386.1	4.9	382.5	155.5	3	321	0	0.1	459063	7.19351e+06
382.5	81.9	390.6	0	389	155.8	4	280	0.02	5.97	459068	7.19351e+06
385.7	87.5	395.1	0	392.3	156.3	14	335	0.29	10.82	459073	7.19351e+06
389	90.2	399.6	0	395.6	157.3	21	322	0.14	5.86	459078	7.19351e+06
395.6	95.9	404.1	3.4	402.1	158	27	328	0.69	5.69	459083	7.19351e+06
398.8	101.5	408.7	3.4	405.4	158	15	8	0	0.31	459088	7.19351e+06
405.4	104.4	413.2	3.4	411.9	158.1	6	359	0	0.13	459093	7.19351e+06
408.7	110.1	417.7	6.9	415.2	158.1	5	6	0	0.25	459098	7.19351e+06
415.2	115.8	422.2	12.4	421.7	158.1	6	356	0	0.12	459103	7.19351e+06
418.5	118.7	426.6	15.4	425	158.2	7	357	0	0.23	459108	7.19351e+06
425.1	124.3	431.1	21.8	431.5	158.3	7	347	0	0.3	459113	7.19351e+06
428.4	130	435.6	24.8	434.8	158.7	8	316	0	0.24	459118	7.19351e+06
435	132.8	440.2	30.8	441.3	159.2	6	316	0	0.21	459123	7.19351e+06
438.3	138.5	444.7	33.9	444.6	159.5	6	336	0	0.21	459128	7.19351e+06
441.6	144.3	449.2	37.1	447.9	159.7	7	324	0	0.27	459133	7.19351e+06
448.2	147.1	453.7	43.6	454.5	160	8	330	0	0.27	459138	7.19351e+06
451.5	152.9	458.2	46.9	457.8	160.3	7	309	0	0.21	459143	7.19351e+06
458.2	158.7	462.8	53.5	464.4	160.8	6	302	0	0.19	459148	7.19351e+06
461.5	161.6	471.9	56.8	467.7	161.3	4	264	0	0.21	459153	7.19351e+06
468.1	167.4	476.4	63.5	474.3	161.8	5	286	0.02	0.39	459158	7.19351e+06
471.5	173.2	481	66.9	477.6	162.1	4	283	0.61	3.79	459163	7.19351e+06
478.1	176.1	485.5	73.7	484.2	162.5	4	270	0	0.16	459168	7.19351e+06
481.4	181.9	490.1	77.1	487.5	162.8	6	255	0	0.22	459173	7.19351e+06
488.1	187.8	494.6	83.8	494.2	163.4	8	263	0	0.24	459178	7.19351e+06
491.4	190.7	499.2	87.2	497.5	163.8	4	275	0	0.17	459183	7.19351e+06
494.8	196.5	503.8	90.4	500.8	164.1	3	319	0	0.19	459188	7.19351e+06
501.4	202.4	508.3	97	507.4	164.3	2	343	0	0.19	459193	7.19351e+06
504.8	205.3	512.9	100.3	510.8	164.5	2	315	0.56	4.4	459198	7.19351e+06
511.5	211.2	517.5	107	517.4	164.7	3	302	0	0.09	459203	7.19351e+06
514.1	217.1	522.1	110.3	520.7	165	4	294	0	0.11	459208	7.19351e+06
519	220	526.6	117	526.6	165.1	3	305	0	0.04	459213	7.19351e+06
521.4	225.9	531.2	120.4	525.9	165.3	5	279	0	0.23	459218	7.19351e+06
13.8	150.7	23.8	44.8	27.8	148.9	0	-1	0	0.47	458683	7.19351e+06
17.2	149.2	27.7	41.4	29.6	148.9	0	-1	0.25	0.45	458688	7.19351e+06
23.1	146.3	31.9	34.5	34.1	148.9	0	-1	0.22	0.58	458693	7.19351e+06
26.2	143.1	36.2	31	36.6	149	7	206	0	0.33	458698	7.19351e+06
32.7	141.5	40.6	24.1	42.1	149	9	182	0.62	3.04	458703	7.19351e+06
36	138.4	45.1	20.7	44.9	149.2	14	185	0.15	1.32	458708	7.19351e+06
42.6	135.5	49.6	13.8	50.9	149.1	14	200	0.43	7.49	458713	7.19351e+06
46	134.2	54.2	10.3	53.9	149.5	4	202	0.74	10.73	458718	7.19351e+06
49.3	131.6	58.8	6.9	57	149.7	6	223	0.56	8.39	458723	7.19351e+06
55.7	129.2	63.4	0	63.4	149.9	4	269	0.51	4.46	458728	7.19351e+06
58.9	128.2	68	3.4	66.6	150.1	4	214	0.61	8.48	458733	7.19351e+06
65.4	126.2	72.4	0	73	150.3	1	216	0.79	8.8	458738	7.19351e+06
68.7	124.5	76.7	0	76.3	150.3	7	198	0.8	8.45	458743	7.19351e+06
75.3	123.7	81.2	0	82.8	150.2	6	176	0.77	10.9	458748	7.19351e+06
78.6	122.4	85.6	3.4	86.1	150.3	5	218	0.8	9.39	458753	7.19351e+06
85.2	120.8	90.1	0	92.8	150.3	3	18	0.38	7.7	458758	7.19351e+06
88.6	120.1	94.7	0	96	150.5	7	219	0.61	9.26	458763	7.19351e+06
95.3	118.9	103.8	4.9	102.5	150.6	6	284	0.32	5.75	458768	7.19351e+06
98.7	118	108.3	7.7	105.7	150.6	2	349	0.78	6.82	458773	7.19351e+06
102	117.6	112.9	9.7	109	150.7	2	242	0.84	5.42	458778	7.19351e+06
108.8	116.5	117.5	15.4	115.5	150.7	2	176	0.87	7.16	458783	7.19351e+06
112.2	113.4	122.1	18.6	118.8	150.7	5	295	0.87	6.6	458788	7.19351e+06
118.8	111	126.8	24.8	125.4	150.8	1	75	0.67	8.45	458793	7.19351e+06
122.1	106.4	131.4	27.8	128.7	150.8	2	111	0.77	9.74	458798	7.19351e+06
128.7	101.9	136	33.9	135.4	150.9	1	249	0.67	7.71	458803	7.19351e+06
131.9	99.7	140.7	37.1	138.7	150.9	1	345	0.6	7.02	458808	7.19351e+06
138.4	94.9	145.3	43.2	145.4	150.8	3	77	0.71	9.4	458813	7.19351e+06
141.7	89.2	150	46.2	148.8	150.9	3	346	0.72	9.84	458818	7.19351e+06
144.9	86.4	154.7	46	152.1	151	3	356	0.56	5.89	458823	7.19351e+06
151.5	80.8	159.3	40.2	158.8	151.1	1	90	0.8	9.45	458828	7.19351e+06
154.8	75.2	163.8	37.3	162.2	151	3	350	0.94	8.85	458833	7.19351e+06
161.4	72.5	168.4	31.8	169	151	1	292	0.67	7.16	458838	7.19351e+06
164.7	67.1	172.9	29.2	172.2	151.1	4	6	0.6	6.59	458843	7.19351e+06
171.4	61.8	177.4	24.4	178.7	151.1	5	82	0.68	7.3	458848	7.19351e+06
174.7	59.2	181.8	22.1	182	151.1	2	351	0.62	8.75	458853	7.19351e+06
181.4	54.1	186.3	18.6	188.5	151.1	1	216	0.61	8.48	458858	7.19351e+06
184.7	49.2	195.3	17.2	191.8	151.1	3	246	0.85	6.99	458863	7.19351e+06
191.4	46.9	199.8	12.4	198.4	151.1	3	1	0.41	9.94	458868	7.19351e+06
194.7	42.4	204.3	10.9	201.7	151	4	171	0	2.43	458873	7.19351e+06
198.1	38.2	208.9	10.3	205	151.2	5	305	0.8	7.6	458878	7.19351e+06
204.8	36.1	213.4	7.7	211.6	151.3	3	49	0.83	8.14	458883	7.19351e+06
208.2	32.5	218	6.9	214.9	151.2	4	99	0.76	8.37	458888	7.19351e+06
214.7	29.5	222.5	3.4	221.5	151.3	5	356	0.86	8.71	458893	7.19351e+06
217.9	27.7	227.1	3.4	224.9	151.1	1	329	0	0.16	458898	7.19351e+06
224.5	24.2	231.7	0	231.5	151.5	10	347	0.27	10.59	458903	7.19351e+06
227.8	21.8	236.2	0	234.8	151.7	1	191	0.92	9.78	458908	7.19351e+06
234.3	21.2	240.8	3.4	241.5	151.7	8	7	0.15	4.62	458913	7.19351e+06
237.6	21.2	245.4	3.4	244.9	151.1	2	73	0.29	4.23	458918	7.19351e+06
244.2	21	250	3.4	251.6	151.4	7	236	0.89	11.25	458923	7.19351e+06
247.5	21.2	254.6	4.9	254.9	151.6	2	295	0.9	9.04	458928	7.19351e+06
250.9	19	259.2	6.9	258.3	151.6	3	51	0.56	4.94	458933	7.19351e+06
257.5	18	263.9	6.9	264.8	151.7	4	326	0.5	5.83	458938	7.19351e+06
260.8	18.2	268.2	6.9	268.1	151.9	5	327	0.64	8.87	458943	7.19351e+06
267.5	19	272.6	9.7	274.6	152	0	18	0.81	11.95	458948	7.19351e+06
270.8	18	277	10.3	277.8	151.8	7	90	0.73	8.58	458953	7.19351e+06
277.5	18	285.8	10.3	284.2	151.8	4	1	0.44	7.35	458958	7.19351e+06
280.8	18.2	290.2	10.3	287.3	152.2	9	299	0.26	7.4	458963	7.19351e+06
287.3	20.1	294.7	7.7	293.7	152.4	4	325	0.71	11.32	458968	7.19351e+06
290.5	21.6	299.1	6.9	296.9	152.6	3	259	0.68	5.36	458973	7.19351e+06
293.7	25.5	303.6	4.9	300.1	152.8	4	18	0.88	8.34	458978	7.19351e+06
300.1	30	308.1	0	306.5	152.5	2	358	0.03	2.62	458983	7.19351e+06
303.3	31.3	312.5	0	309.7	152.8	10	290	0.78	4.76	458988	7.19351e+06
309.7	33.5	317	3.4	316.2	153	8	346	0.87	12.36	458993	7.19351e+06
313	36.5	321.5	6.9	319.4	153.2	5	346	0.57	6.63	458998	7.19351e+06
319.4	37.1	326	13.8	325.9	153.1	3	37	0.62	13.14	459003	7.19351e+06
322.7	39	330.5	17.2	329.1	153.1	6	19	0.25	12.8	459008	7.19351e+06
329.1	41.7	335	23.1	335.6	153.4	6	2	0.43	15.73	459013	7.19351e+06
332.4	43.3	339.5	26.2	338.9	153.5	3	261	0.6	12.26	459018	7.19351e+06
338.9	46.9	344	31.8	345.4	153.7	4	335	0.76	10.99	459023	7.19351e+06
342.2	50.9	348.6	29.6	348.7	153.9	2	267	0.79	13.13	459028	7.19351e+06
345.4	53.1	353.1	26.9	352	154	6	163	0.73	10.5	459033	7.19351e+06
352	57.6	357.6	21.8	358.5	154.1	4	253	0.25	6.93	459038	7.19351e+06
355.2	62.4	362.1	18.6	361.8	154.7	7	12	0.58	18.15	459043	7.19351e+06
361.8	64.9	366.6	12.4	368.3	154.6	6	28	0.8	4.99	459048	7.19351e+06
365.1	70	375.6	9.7	371.6	154.6	11	294	0.35	3.37	459053	7.19351e+06
371.6	75.2	380.1	4.9	378.1	155.6	7	318	0.19	6.84	459058	7.19351e+06
374.9	77.8	384.6	3.4	381.4	155.7	4	335	0	0.32	459063	7.19351e+06
381.4	83.2	389.1	0	387.9	156.6	9	291	0.59	12.09	459068	7.19351e+06
384.7	88.6	393.6	3.4	391.2	157	7	12	0.23	9.66	459073	7.19351e+06
387.9	91.4	398.2	3.4	394.5	157.7	12	285	0.23	2.1	459078	7.19351e+06
394.5	96.9	402.6	6.9	401	158.5	14	287	0.48	9.91	459083	7.19351e+06
397.8	102.5	407.1	3.4	404.3	158.7	3	31	0	0.17	459088	7.19351e+06
404.3	105.3	411.6	3.4	410.8	158.5	7	345	0	0.25	459093	7.19351e+06
407.6	111	416.1	6.9	414.1	158.5	6	26	0	0.13	459098	7.19351e+06
414.2	116.7	420.6	13.8	420.6	158.6	6	336	0	0.21	459103	7.19351e+06
417.5	119.5	425.1	17.2	423.9	158.8	7	339	0	0.24	459108	7.19351e+06
424.1	125.3	429.7	23.1	430.5	159	9	344	0	0.22	459113	7.19351e+06
427.4	131	434.2	26.2	433.7	159.3	8	328	0	0.24	459118	7.19351e+06
434	133.8	438.7	32.5	440.3	159.7	8	328	0	0.2	459123	7.19351e+06
437.3	139.5	443.2	35.5	443.6	160	7	330	0	0.18	459128	7.19351e+06
440.7	145.2	447.8	38.5	446.9	160.2	7	345	0	0.19	459133	7.19351e+06
447.3	148	452.3	44.8	453.5	160.6	7	323	0.63	4.37	459138	7.19351e+06
450.6	153.7	456.8	48	456.8	160.7	7	328	0.18	4.25	459143	7.19351e+06
457.3	159.5	461.4	54.5	463.4	161	5	313	0	0.21	459148	7.19351e+06
460.6	162.4	470.5	57.8	466.7	161.3	5	287	0	0.23	459153	7.19351e+06
467.2	168.1	475.1	64.4	473.3	161.7	5	262	0	0.25	459158	7.19351e+06
470.6	173.9	479.6	67.7	476.6	162	3	251	0.13	1.86	459163	7.19351e+06
477.2	176.8	484.2	74.4	483.3	162.4	5	223	0	0.18	459168	7.19351e+06
480.6	182.6	488.7	77.7	486.6	162.9	8	270	0	0.23	459173	7.19351e+06
487.2	188.5	493.3	84.5	493.2	163.4	5	276	0	0.21	459178	7.19351e+06
490.6	191.4	497.9	87.9	496.5	163.9	5	283	0	0.2	459183	7.19351e+06
493.9	197.2	502.5	91.2	499.9	164.2	2	318	0	0.11	459188	7.19351e+06
500.6	203	507.1	98	506.5	164.4	3	299	0	0.11	459193	7.19351e+06
504	206	511.6	101.3	509.9	164.6	3	308	0	0.14	459198	7.19351e+06
509.2	211.8	516.2	107.9	516.5	164.8	3	309	0	0.16	459203	7.19351e+06
511.7	217.7	520.8	111.2	519.9	165	3	276	0	0.07	459208	7.19351e+06
516.6	220.6	525.4	117.9	523.3	165.2	1	307	0	0.11	459213	7.19351e+06
519	226.5	530	121.2	522.5	165.4	4	279	0	0.2	459218	7.19351e+06
523.9	232.4	534.6	127.9	521.1	165.7	4	297	0	0.14	459223	7.19351e+06
44.8	139.6	53.1	10.9	52.5	148.9	2	263	0.57	9.49	458718	7.1935e+06
48	137.1	57.4	7.7	55.7	149.4	9	184	0.91	9.39	458723	7.1935e+06
54.5	134.8	61.8	3.4	62.1	149.5	2	250	0.66	8.5	458728	7.1935e+06
57.8	133.8	66.2	4.9	65.4	149.7	2	212	0.48	10.01	458733	7.1935e+06
64.4	131.9	70.6	3.4	72	149.6	6	248	0.41	4.8	458738	7.1935e+06
67.7	130.3	75.1	3.4	75.3	149.9	5	176	0.8	15.04	458743	7.1935e+06
74.4	129.5	79.6	0	81.9	149.9	2	339	0.5	6.03	458748	7.1935e+06
77.7	128.2	84.2	0	85.1	150.1	2	270	0.68	13.91	458753	7.1935e+06
84.5	126.6	88.7	3.4	91.6	150.2	3	188	0.19	6.67	458758	7.1935e+06
87.9	125.9	93.3	0	94.8	150.4	2	126	0.04	2.93	458763	7.1935e+06
94.6	124.8	102.5	3.4	101.3	150.4	5	226	0.75	11.47	458768	7.1935e+06
98	123.9	107.2	4.9	104.6	150.6	5	190	0.89	9.38	458773	7.1935e+06
101.3	123.6	111.8	7.7	107.9	150.7	4	200	0.69	5.23	458778	7.1935e+06
107.9	121.8	116.5	14.2	114.5	150.8	4	295	0.76	8.57	458783	7.1935e+06
111.2	117.2	121.1	17.2	117.9	150.8	1	126	0.51	7.75	458788	7.1935e+06
117.8	114.9	125.8	23.1	124.5	150.8	1	257	0.88	10.88	458793	7.1935e+06
121	110.4	130.4	26.2	127.9	150.9	2	248	0.94	11.93	458798	7.1935e+06
127.5	105.3	135.1	32.5	134.6	151.1	2	7	0.8	7.92	458803	7.1935e+06
130.8	102.5	139.7	35.5	137.9	151	1	93	0.88	8.1	458808	7.1935e+06
137.3	96.9	144.2	41.6	144.6	150.9	1	66	0.92	10.65	458813	7.1935e+06
140.6	91.4	148.8	44.8	148	151	1	23	0.76	7.96	458818	7.1935e+06
143.9	88.6	153.3	47.9	151.4	151	2	146	0.68	8.23	458823	7.1935e+06
150.5	83.2	157.9	42.1	158.1	151	3	73	0.77	7.61	458828	7.1935e+06
153.8	77.8	162.4	39.3	161.3	151	2	339	0.82	6.49	458833	7.1935e+06
160.5	75.2	166.8	34.1	167.8	151.1	1	16	0.85	5.47	458838	7.1935e+06
163.8	70	171.3	31.8	171.1	151.2	1	155	0.94	4.58	458843	7.1935e+06
170.5	64.9	175.8	26.9	177.6	151.2	2	42	0.86	4.55	458848	7.1935e+06
173.8	62.4	180.3	24.8	180.9	151.2	4	12	0.83	5.7	458853	7.1935e+06
180.5	57.6	184.8	21.8	187.5	151	2	53	0.87	7.51	458858	7.1935e+06
183.9	53.1	193.8	19.5	190.8	151.2	2	124	0.86	7.41	458863	7.1935e+06
190.6	50.9	198.4	15.4	197.4	151.1	3	179	0.59	7.09	458868	7.1935e+06
194	46.7	202.9	14.2	200.7	151.1	1	36	0.63	9.42	458873	7.1935e+06
197.3	42.6	207.5	13.8	204	151.1	1	135	0.89	9.06	458878	7.1935e+06
203.8	40.8	212.1	10.9	210.6	151.2	2	10	0.9	7.89	458883	7.1935e+06
207	37.6	216.7	9.7	214	151.3	0	162	0.63	8.2	458888	7.1935e+06
213.6	34.2	221.2	6.9	220.6	151.4	2	326	0.71	9.89	458893	7.1935e+06
216.9	32.5	225.8	4.9	224	151.2	5	296	0.84	10.88	458898	7.1935e+06
223.4	29.5	230.4	3.4	230.7	151.6	4	260	0.76	10.31	458903	7.1935e+06
226.7	27.7	235	0	234	151.7	2	346	0.72	8.37	458908	7.1935e+06
233.4	27.2	239.7	0	240.7	151.7	2	180	0.65	7.28	458913	7.1935e+06
236.7	27.2	244.3	0	244.1	151.6	5	80	0.69	8.59	458918	7.1935e+06
243.3	27	248.9	0	250.6	151.4	9	43	0.5	7.69	458923	7.1935e+06
246.6	26.8	253.3	3.4	253.9	151.4	2	328	0.05	2.28	458928	7.1935e+06
249.9	24.7	257.6	3.4	257.2	151.7	7	213	0.15	4.02	458933	7.1935e+06
256.6	24	262	3.4	263.7	151.8	2	159	0.41	9.96	458938	7.1935e+06
259.9	24.2	266.4	3.4	267	152	4	211	0.87	7.71	458943	7.1935e+06
266.6	24.7	270.8	6.9	273.3	152.1	2	317	0.83	9.37	458948	7.1935e+06
269.9	24	275.2	6.9	276.5	152	5	355	0.59	13.05	458953	7.1935e+06
276.5	24	284.1	6.9	282.8	152	2	129	0.72	11.08	458958	7.1935e+06
279.6	24.2	288.6	6.9	286	152.1	5	213	0.79	11.11	458963	7.1935e+06
286	25.6	293	4.9	292.4	152.5	1	265	0.63	8.09	458968	7.1935e+06
289.2	26.8	297.5	3.4	295.6	152.6	3	181	0.43	7.78	458973	7.1935e+06
292.4	30	302	3.4	298.9	152.6	4	339	0	0.18	458978	7.1935e+06
298.9	33.9	306.5	0	305.3	152.7	6	8	0.67	10.23	458983	7.1935e+06
302.1	36.1	311	0	308.5	153	4	260	0.63	4.46	458988	7.1935e+06
308.5	39	315.5	4.9	315	153.2	3	17	0.72	3.68	458993	7.1935e+06
311.8	41.7	320	7.7	318.3	153.4	2	13	0.89	3.2	458998	7.1935e+06
318.3	43	324.5	14.2	324.8	153.4	3	22	0.63	5.36	459003	7.1935e+06
321.5	44.6	329	17.6	328	153.6	1	333	0.63	7.17	459008	7.1935e+06
328	47	333.6	24.4	334.5	153.4	6	63	0.36	6.38	459013	7.1935e+06
331.3	48.4	338.1	27.8	337.8	153.6	5	295	0.55	11.42	459018	7.1935e+06
337.8	51.6	342.6	30.8	344.3	154	2	227	0.78	14.05	459023	7.1935e+06
341.1	55.3	347	27.8	347.6	154.4	3	275	0.81	7.98	459028	7.1935e+06
344.3	57.3	351.5	24.8	350.9	154	5	78	0.04	0.35	459033	7.1935e+06
350.9	61.6	356	19.5	357.4	154	8	246	0.08	4.45	459038	7.1935e+06
354.2	66.1	360.5	17.2	360.7	154.5	8	250	0	0.47	459043	7.1935e+06
360.7	68.4	365	10.9	367.2	154.7	10	316	0.54	7.62	459048	7.1935e+06
364	73.2	374.1	7.7	370.5	155.8	19	326	0.18	1.26	459053	7.1935e+06
370.5	78.2	378.6	3.4	377	156.2	9	76	0.26	14.57	459058	7.1935e+06
373.8	80.8	383.1	0	380.3	156.2	12	321	0.13	11.56	459063	7.1935e+06
380.3	86	387.6	3.4	386.9	156.5	14	278	0.15	12.13	459068	7.1935e+06
383.6	91.2	392.1	4.9	390.1	157.5	12	301	0.3	9	459073	7.1935e+06
386.9	93.9	396.6	6.9	393.4	158.1	8	333	0.25	11.34	459078	7.1935e+06
393.4	99.3	401.1	4.9	399.9	158.8	6	301	0.65	4.5	459083	7.1935e+06
396.7	104.8	405.6	3.4	403.2	158.9	2	344	0	0.09	459088	7.1935e+06
403.3	107.5	410.1	3.4	409.7	158.9	4	307	0	0.14	459093	7.1935e+06
406.6	113.1	414.6	6.9	413	158.7	4	94	0	0.16	459098	7.1935e+06
413.2	118.7	419.1	13.8	419.6	159	4	310	0	0.17	459103	7.1935e+06
416.5	121.5	423.7	17.2	422.8	159.3	7	306	0	0.27	459108	7.1935e+06
423.2	127.1	428.2	24.1	429.4	159.6	6	341	0	0.17	459113	7.1935e+06
426.5	132.8	432.7	27.6	432.7	159.8	6	327	0	0.17	459118	7.1935e+06
433.1	135.7	437.3	33.9	439.3	160.2	6	312	0	0.13	459123	7.1935e+06
436.4	141.4	441.8	37.1	442.6	160.5	7	312	0	0.22	459128	7.1935e+06
439.7	147.1	446.4	40.2	445.9	160.8	6	345	0	0.16	459133	7.1935e+06
446.4	149.9	450.9	46.2	452.5	161	6	305	0	0.22	459138	7.1935e+06
449.7	155.6	455.5	49.3	455.8	161.2	6	345	0	0.24	459143	7.1935e+06
456.4	161.3	460	55.7	462.4	161.3	5	355	0	0.11	459148	7.1935e+06
459.7	164.1	469.2	58.9	465.7	161.4	3	328	0	0.12	459153	7.1935e+06
466.4	169.8	473.7	65.4	472.4	161.6	3	252	0	0.25	459158	7.1935e+06
469.7	175.6	478.3	68.7	475.7	161.9	4	271	0	0.2	459163	7.1935e+06
476.4	178.4	482.9	75.3	482.3	162.4	6	297	0	0.17	459168	7.1935e+06
479.7	184.2	487.5	78.6	485.7	163	7	291	0	0.23	459173	7.1935e+06
486.4	190	492.1	85.2	492.3	163.5	7	278	0	0.23	459178	7.1935e+06
489.7	192.9	496.6	88.6	495.6	163.9	5	269	0	0.16	459183	7.1935e+06
493.1	198.7	501.2	91.9	499	164.4	4	261	0	0.13	459188	7.1935e+06
499.6	204.5	505.8	98.7	505.6	164.6	2	309	0	0.12	459193	7.1935e+06
502	207.4	510.4	102	509	164.7	3	319	0	0.15	459198	7.1935e+06
506.8	213.2	515	108.8	515.7	164.9	3	258	0	0.16	459203	7.1935e+06
509.2	219	519.6	112.2	519	165.1	3	260	0.87	5.55	459208	7.1935e+06
514.1	221.9	524.2	118.8	519.9	165.3	2	310	0	0.18	459213	7.1935e+06
516.6	227.8	528.8	122.1	519.1	165.5	2	278	0	0.17	459218	7.1935e+06
521.5	233.6	533.5	127.9	517.7	165.8	3	298	0	0.13	459223	7.1935e+06
0	167.3	10.6	56.1	14.2	149.3	9	72	0	0.41	458673	7.1935e+06
46	142.6	55.6	12.4	53.5	148.9	5	205	0.33	1.12	458723	7.1935e+06
52.7	140.5	60.1	10.3	60.2	149	10	194	0.09	1.08	458728	7.1935e+06
56.1	139.5	64.6	10.9	63.4	149.4	13	217	0.56	2.5	458733	7.1935e+06
62.9	137.6	69.2	9.7	69.8	149.7	7	166	0.78	2.96	458738	7.1935e+06
66.3	136.1	73.7	7.7	73	149.6	9	210	0.5	5.3	458743	7.1935e+06
73	135.4	78.3	4.9	79.6	149.6	3	211	0.82	4.97	458748	7.1935e+06
76.3	133.9	83	3.4	82.8	149.7	6	197	0.77	6.04	458753	7.1935e+06
82.8	132.4	87.6	0	89.5	149.9	5	175	0.6	6.13	458758	7.1935e+06
86.1	131.8	92.2	0	92.8	150.1	8	237	0.88	7.88	458763	7.1935e+06
92.8	130.7	101.6	0	99.5	150.2	3	99	0.35	3.7	458768	7.1935e+06
96	129.9	106.2	3.4	102.8	150.6	2	207	0.73	14.08	458773	7.1935e+06
99.2	129.5	110.9	4.9	106.2	150.5	2	105	0.35	11.3	458778	7.1935e+06
105.7	125.6	115.6	10.9	112.9	150.7	1	24	0.72	11.71	458783	7.1935e+06
109	121.1	120.2	14.2	116.2	150.7	2	160	0.85	8.64	458788	7.1935e+06
115.5	118.7	124.7	20.1	123	150.8	2	205	0.34	1.21	458793	7.1935e+06
118.8	113.1	129.2	23.1	126.4	150.9	6	320	0.32	3.68	458798	7.1935e+06
125.4	107.5	133.8	29.4	133.1	150.9	2	268	0.14	5.86	458803	7.1935e+06
128.7	104.8	138.3	32.5	136.3	151.1	0	169	0.24	5.88	458808	7.1935e+06
135.4	99.3	142.9	38.5	142.8	151	1	267	0.39	6.83	458813	7.1935e+06
138.7	93.9	147.3	41.6	146	151	1	87	0.76	11.09	458818	7.1935e+06
142.1	91.2	151.8	44.8	149.3	151	4	242	0.67	8.79	458823	7.1935e+06
148.8	86	156.3	46.4	155.8	151	4	155	0.85	8.2	458828	7.1935e+06
152.1	80.8	160.7	43.9	159.1	151.1	2	187	0.79	7.32	458833	7.1935e+06
158.8	78.2	165.2	39	165.7	151.1	2	350	0.8	4.99	458838	7.1935e+06
162.2	73.2	169.8	36.6	169	151.2	0	149	0.84	6.64	458843	7.1935e+06
169	68.4	174.3	32.5	175.6	151.2	3	113	0.81	5.28	458848	7.1935e+06
172.2	66.1	178.8	30.8	178.9	151.2	2	6	0.92	6.09	458853	7.1935e+06
178.7	61.6	183.4	26.9	185.6	151.1	3	341	0.89	7.79	458858	7.1935e+06
182	57.3	192.5	24.8	188.9	151.1	1	344	0.93	7.36	458863	7.1935e+06
188.5	55.2	197.1	21.8	195.6	151.1	1	37	0.98	6.95	458868	7.1935e+06
191.8	51.1	201.7	21	198.9	151.2	1	336	0.84	6.63	458873	7.1935e+06
195.1	47.4	206.3	20.1	202.3	151.1	2	344	0.69	9.64	458878	7.1935e+06
201.7	45.8	210.8	17.2	208.9	151.2	1	142	0.43	5.93	458883	7.1935e+06
205	42.6	215.5	15.4	212.3	151.3	3	271	0.83	8.77	458888	7.1935e+06
211.6	39.1	220.1	12.4	219	151.4	3	22	0.7	7.42	458893	7.1935e+06
214.9	37.6	224.7	10.9	222.3	151.5	2	244	0.83	9.92	458898	7.1935e+06
221.5	35.1	229.3	4.9	228.8	151.6	5	215	0.74	8.34	458903	7.1935e+06
224.9	33.5	233.9	3.4	232.1	151.6	1	51	0.63	6.29	458908	7.1935e+06
231.5	33.1	238.3	3.4	238.7	151.8	3	245	0.82	7.52	458913	7.1935e+06
234.8	33.1	242.6	3.4	241.9	151.7	4	91	0.63	9.65	458918	7.1935e+06
241.5	33	247	3.4	248.4	151.8	1	252	0.38	8.52	458923	7.1935e+06
244.9	32.3	251.4	0	251.6	151.7	4	299	0.47	11.87	458928	7.1935e+06
248.2	30.6	255.8	0	254.7	151.9	2	307	0.56	13.44	458933	7.1935e+06
254.7	30	260.2	0	261.1	151.9	5	338	0.69	12.03	458938	7.1935e+06
257.9	30.1	264.7	0	264.3	152	9	357	0.64	8.87	458943	7.1935e+06
264.3	30.6	269.1	0	270.7	152.1	6	10	0.48	6.99	458948	7.1935e+06
267.5	30	273.6	0	273.9	152.1	4	350	0.45	8.94	458953	7.1935e+06
273.9	30	282.5	0	280.3	152.1	6	20	0.31	11.65	458958	7.1935e+06
277.1	30.1	287	0	283.5	152.2	9	3	0.16	2.57	458963	7.1935e+06
283.5	31.3	291.5	0	290	152.4	6	340	0.49	14.86	458968	7.1935e+06
286.8	32.3	295.9	0	293.2	152.7	5	332	0.55	6.62	458973	7.1935e+06
290	35	300.4	0	296.5	153	1	183	0.57	6.04	458978	7.1935e+06
296.5	38.4	305	3.4	303	153.1	4	350	0.67	3.69	458983	7.1935e+06
299.7	40.4	309.5	4.9	306.2	153.2	5	307	0.74	6.5	458988	7.1935e+06
306.2	44.6	314	9.7	312.7	153.4	3	22	0.57	5.51	458993	7.1935e+06
309.5	47	318.5	12.4	316	153.5	2	63	0.7	4.27	458998	7.1935e+06
316	48.4	323.1	17.2	322.5	153.5	2	49	0.73	4.34	459003	7.1935e+06
319.3	50.3	327.5	20.1	325.8	153.6	5	313	0.69	6.75	459008	7.1935e+06
325.8	52.4	332	26.2	332.4	154	9	29	0.87	8.27	459013	7.1935e+06
329.1	53.7	336.5	29.4	335.6	153.8	4	293	0.48	6.4	459018	7.1935e+06
335.6	56.6	341	27.8	342.2	154.5	5	297	0.83	7.3	459023	7.1935e+06
338.9	60	345.5	24.8	345.4	154.5	7	90	0.58	4.94	459028	7.1935e+06
342.2	61.8	350	21.8	348.7	154.1	5	4	0.19	2.74	459033	7.1935e+06
348.7	65.8	354.5	15.4	355.2	154.2	4	340	0.62	9.05	459038	7.1935e+06
352	70	359.1	12.4	358.5	154.3	4	1	0.42	3.04	459043	7.1935e+06
358.5	72.2	363.6	7.7	365.1	155.4	21	286	0.26	10.82	459048	7.1935e+06
361.8	76.8	372.6	4.9	368.3	156.2	4	61	0	0.08	459053	7.1935e+06
368.4	81.6	377.1	0	374.9	156.1	2	308	0	0.38	459058	7.1935e+06
371.7	84.1	381.6	3.4	378.1	156.7	3	272	0.63	14.9	459063	7.1935e+06
378.2	89	386.1	7.7	384.7	156.6	9	282	0.32	14.19	459068	7.1935e+06
381.5	94.2	390.6	9.7	387.9	157.9	12	286	0.27	10.02	459073	7.1935e+06
384.8	96.7	395.1	10.3	391.2	158.5	11	296	0.56	12.51	459078	7.1935e+06
391.4	102	399.6	3.4	397.8	159.2	5	46	0.46	11.6	459083	7.1935e+06
394.8	107.3	404.1	0	401.1	159.1	3	6	0	0.09	459088	7.1935e+06
401.4	110	408.7	4.9	407.6	159.1	4	354	0	0.17	459093	7.1935e+06
404.7	115.5	413.2	7.7	410.9	159	8	358	0	0.18	459098	7.1935e+06
411.3	120.9	417.7	14.2	417.5	159.3	7	341	0	0.22	459103	7.1935e+06
414.6	123.7	422.3	17.6	420.8	159.7	7	303	0	0.22	459108	7.1935e+06
421.3	129.2	426.8	24.4	427.4	160.1	6	318	0	0.17	459113	7.1935e+06
424.6	134.8	431.4	27.8	430.7	160.2	7	342	0.03	1	459118	7.1935e+06
431.3	137.6	435.9	34.6	437.3	160.5	4	321	0	0.13	459123	7.1935e+06
434.6	143.3	440.5	38.1	440.7	160.8	6	305	0	0.26	459128	7.1935e+06
437.9	148.9	445	41.5	444	161.2	5	333	0	0.21	459133	7.1935e+06
444.6	151.8	449.6	48.4	450.6	161.3	6	339	0	0.23	459138	7.1935e+06
448	157.5	454.2	51.8	453.9	161.7	7	304	0.56	5.52	459143	7.1935e+06
454.6	163.2	458.7	58.6	460.6	161.8	6	2	0	0.19	459148	7.1935e+06
458	166.1	467.9	61.6	463.9	161.7	6	2	0	0.17	459153	7.1935e+06
464.7	171.7	472.5	67.9	470.6	161.8	5	332	0	0.19	459158	7.1935e+06
468	177.4	477.1	71	473.9	162.1	7	320	0	0.18	459163	7.1935e+06
474.7	180.3	481.7	77.4	480.6	162.6	4	297	0	0.17	459168	7.1935e+06
478.1	186	486.2	80.7	483.9	163	7	266	0	0.17	459173	7.1935e+06
484.8	191.7	490.8	87.2	490.6	163.5	7	263	0.02	0.39	459178	7.1935e+06
487.4	194.5	495.4	90.4	493.9	163.9	4	261	0	0.16	459183	7.1935e+06
489.8	200.3	500	93.7	497.3	164.2	5	248	0	0.18	459188	7.1935e+06
494.6	206	504.6	100.3	504	164.6	5	250	0	0.25	459193	7.1935e+06
497.1	208.9	509.3	103.7	507.3	164.9	3	268	0	0.13	459198	7.1935e+06
501.9	214.7	513.9	110.3	514	165	2	225	0	0.18	459203	7.1935e+06
504.4	220.5	518.5	113.7	514.8	165.1	4	261	0	0.16	459208	7.1935e+06
509.3	223.4	523.1	120.4	513.2	165.4	3	271	0	0.14	459213	7.1935e+06
511.8	229.2	527.7	123	512.4	165.6	2	260	0	0.1	459218	7.1935e+06
516.8	235	532.3	121.2	510.9	165.8	4	276	0.57	5.08	459223	7.1935e+06
519.3	237.9	537	120.4	510.2	166.1	1	20	0	0.12	459228	7.1935e+06
55.6	142.3	62.5	14.2	62.1	148.9	0	-1	0	0.37	458733	7.19349e+06
62.1	140.5	67.2	12.4	68.7	149	7	234	0.03	1.59	458738	7.19349e+06
65.4	139	71.9	10.9	72	149.4	2	94	0.44	4.25	458743	7.19349e+06
72	138.3	76.6	7.7	78.6	149.5	2	239	0.72	3.51	458748	7.19349e+06
75.3	136.8	81.2	4.9	81.9	149.6	5	197	0.8	9.44	458753	7.19349e+06
81.9	135.4	85.6	0	88.6	149.7	5	214	0.91	8.57	458758	7.19349e+06
85.1	134.7	90.1	0	91.9	149.7	5	215	0.72	4.62	458763	7.19349e+06
91.6	133.7	99.2	0	98.7	150.3	2	246	0.73	4.41	458768	7.19349e+06
94.8	132.9	103.8	0	102	150.3	4	208	0.75	14.25	458773	7.19349e+06
98.1	132.1	108.3	3.4	105.4	150.3	2	255	0.69	9.28	458778	7.19349e+06
104.6	127.6	112.9	9.7	112.2	150.7	4	238	0.77	12.65	458783	7.19349e+06
107.9	122.6	117.3	12.4	115.5	150.7	2	207	0.59	6.41	458788	7.19349e+06
114.5	119.8	121.8	18.6	122.1	150.7	6	235	0.1	0.16	458793	7.19349e+06
117.9	114.2	126.2	21.8	125.4	150.8	2	255	0.92	11.75	458798	7.19349e+06
124.5	108.7	130.7	27.8	131.9	151	2	317	0.51	6.93	458803	7.19349e+06
127.9	106	135.2	30.8	135.1	151.1	3	266	0.37	4.17	458808	7.19349e+06
134.6	100.6	139.7	37.1	141.7	151.1	1	215	0.42	9.33	458813	7.19349e+06
137.9	95.3	144.2	40.3	144.9	151.1	1	246	0.4	5.66	458818	7.19349e+06
141.3	92.7	148.8	43.6	148.2	151.1	3	74	0.38	5.58	458823	7.19349e+06
148	87.5	153.3	48.7	154.8	151.1	2	261	0.74	10.33	458828	7.19349e+06
151.4	82.4	157.9	46.4	158.1	151.1	3	276	0.65	8.58	458833	7.19349e+06
158.1	79.9	162.5	41.5	164.7	151.2	2	297	0.6	5.22	458838	7.19349e+06
161.3	75	167.1	39.3	168	151.3	4	289	0.85	6.06	458843	7.19349e+06
167.8	70.3	171.7	35.5	174.7	151.2	3	336	0.78	5.57	458848	7.19349e+06
171.1	68	176.3	33.9	178	151.2	3	62	0.93	5.85	458853	7.19349e+06
177.6	63.6	180.9	29.6	184.7	151.2	1	69	0.93	7.02	458858	7.19349e+06
180.9	59.4	190.1	27.8	188	151.2	3	280	0.92	6.74	458863	7.19349e+06
187.5	57.3	194.8	25.1	194.7	151.2	0	90	0.92	6.22	458868	7.19349e+06
190.8	53.4	199.4	24.4	198.1	151.3	4	40	0.9	8.35	458873	7.19349e+06
194.1	49.9	204.1	23.1	201.5	151.2	1	0	0.93	10.44	458878	7.19349e+06
200.7	48.4	208.4	20.1	208.2	151.2	3	294	0.3	10.12	458883	7.19349e+06
204	45	212.7	18.6	211.4	151.4	2	194	0.61	8.47	458888	7.19349e+06
210.6	41.7	217.1	15.4	217.9	151.4	1	293	0.74	7.91	458893	7.19349e+06
214	40.2	221.4	12.4	221.2	151.3	1	45	0.81	8.66	458898	7.19349e+06
220.6	37.9	225.8	7.7	227.8	151.4	4	236	0.92	8.67	458903	7.19349e+06
224	36.5	230.2	6.9	231.1	151.6	3	166	0.75	7.3	458908	7.19349e+06
230.7	36.1	234.7	6.9	237.6	151.6	2	184	0.85	8.98	458913	7.19349e+06
234	36.1	239.1	6.9	240.7	151.7	2	305	0.79	10.85	458918	7.19349e+06
240.7	36	243.5	4.9	247	151.8	1	216	0.32	6.16	458923	7.19349e+06
243.9	35.1	248	3.4	250.2	151.9	2	122	0.36	3.89	458928	7.19349e+06
247	33.5	252.4	3.4	253.4	152	5	302	0.39	8.01	458933	7.19349e+06
253.4	33	256.9	3.4	259.8	152.2	6	265	0.56	11.04	458938	7.19349e+06
256.6	33.1	261.4	3.4	263	152.4	4	90	0.27	5.84	458943	7.19349e+06
263	33.5	265.9	0	269.4	152.5	2	27	0.77	6.91	458948	7.19349e+06
266.2	33	270.4	0	272.6	152.6	6	351	0.54	7.38	458953	7.19349e+06
272.6	33	279.4	0	279.1	152.6	2	337	0.64	7.23	458958	7.19349e+06
275.9	33.1	284	3.4	282.3	152.5	4	337	0.51	7.07	458963	7.19349e+06
282.3	34.2	288.5	0	288.8	152.7	1	342	0.36	13.52	458968	7.19349e+06
285.6	35.1	293	0	292.1	152.9	4	351	0.78	6.11	458973	7.19349e+06
288.8	37.6	297.5	0	295.3	153.1	4	1	0.61	9.52	458978	7.19349e+06
295.3	40.8	302	4.9	301.8	153.2	2	338	0.71	3.73	458983	7.19349e+06
298.6	42.6	306.5	7.7	305.1	153.3	4	298	0.68	6.61	458988	7.19349e+06
305.1	46.7	311	12.4	311.7	153.4	4	294	0.68	6.31	458993	7.19349e+06
308.4	49.7	315.5	14.6	314.9	153.7	3	352	0.66	3.2	458998	7.19349e+06
314.9	51	320	19.5	321.5	153.8	9	346	0.57	3.92	459003	7.19349e+06
318.2	53.2	324.5	22.1	324.8	153.7	4	306	0.59	4.58	459008	7.19349e+06
324.8	55.2	329	27.8	331.3	154	4	297	0.88	16	459013	7.19349e+06
328	56.4	333.6	30.8	334.5	153.9	1	357	0.62	7.32	459018	7.19349e+06
334.5	59.2	338.1	26.2	341.1	154.2	2	277	0.22	4.95	459023	7.19349e+06
337.8	62.4	342.6	23.1	344.3	154.8	3	256	0.83	6.98	459028	7.19349e+06
341.1	64.2	347	20.1	347.6	154.2	4	228	0.51	9.64	459033	7.19349e+06
347.6	68	351.5	14.2	354.2	154.4	1	284	0.46	12.08	459038	7.19349e+06
350.9	72.1	356	10.9	357.4	154.6	5	268	0.08	0.81	459043	7.19349e+06
357.5	74.3	360.5	4.9	364	155.5	13	243	0.05	7.85	459048	7.19349e+06
360.8	78.7	369.6	3.4	367.2	155.8	3	243	0.02	0.42	459053	7.19349e+06
367.3	83.4	374.1	0	373.8	156.5	16	305	0	0.48	459058	7.19349e+06
370.6	85.8	378.6	3.4	377	157	11	310	0.31	7.5	459063	7.19349e+06
377.3	90.7	383.1	9.7	383.6	157.6	16	351	0.37	7.18	459068	7.19349e+06
380.6	95.7	387.7	12.4	386.9	158	12	273	0.18	10.06	459073	7.19349e+06
383.9	98.3	392.2	10.3	390.2	158.9	13	297	0.78	8.64	459078	7.19349e+06
390.5	103.4	396.8	3.4	396.7	159.5	2	37	0.4	4.89	459083	7.19349e+06
393.8	108.7	401.3	0	400	159.3	3	349	0	0.15	459088	7.19349e+06
400.4	111.4	405.9	6.9	406.6	159.5	4	333	0	0.12	459093	7.19349e+06
403.8	116.7	410.4	9.7	409.9	159.5	5	3	0	0.18	459098	7.19349e+06
410.4	122.2	415	15.4	416.5	159.7	4	329	0	0.16	459103	7.19349e+06
413.7	124.9	419.6	18.6	419.8	159.9	7	298	0	0.22	459108	7.19349e+06
420.4	130.4	424.2	25.1	426.5	160.5	6	320	0.55	4.9	459113	7.19349e+06
423.7	135.9	428.7	28.4	429.8	160.7	5	317	0.1	1.97	459118	7.19349e+06
430.4	138.7	433.3	35.1	436.4	160.8	5	344	0	0.2	459123	7.19349e+06
433.8	144.3	437.9	38.5	439.7	161.2	8	297	0	0.21	459128	7.19349e+06
437.1	149.9	442.5	41.9	443.1	161.7	6	319	0	0.17	459133	7.19349e+06
443.8	152.8	447.1	48.7	449.7	161.9	6	355	0	0.19	459138	7.19349e+06
447.1	158.4	451.7	52.1	453	162	6	321	0	0.17	459143	7.19349e+06
453.8	164.1	456.3	59	459.7	162.3	5	359	0	0.23	459148	7.19349e+06
457.2	167	465.5	62.4	463	162.3	8	357	0	0.21	459153	7.19349e+06
463.9	172.7	470.1	69.3	469.7	162.3	7	338	0	0.19	459158	7.19349e+06
467.2	178.4	474.7	72.4	473	162.5	4	340	0	0.2	459163	7.19349e+06
473.9	181.2	479.3	78.7	479.7	162.7	5	309	0	0.11	459168	7.19349e+06
477.3	186.9	483.9	81.9	483.1	163	5	276	0	0.17	459173	7.19349e+06
482.5	192.6	488.5	88.3	489.7	163.5	5	270	0	0.22	459178	7.19349e+06
484.9	195.4	493.2	91.6	493.1	163.8	7	260	0	0.19	459183	7.19349e+06
487.3	201.2	497.8	94.8	496.4	164.2	4	275	0	0.18	459188	7.19349e+06
492.2	206.9	502.4	101.3	503.1	164.5	4	253	0	0.21	459193	7.19349e+06
494.6	209.8	507	104.6	506.5	164.8	3	251	0	0.13	459198	7.19349e+06
499.5	215.5	511.7	111.2	512.3	164.9	1	254	0	0.08	459203	7.19349e+06
502	221.3	516.3	114.5	511.5	165.2	4	293	0	0.14	459208	7.19349e+06
506.9	224.2	520.9	119.6	509.8	165.4	4	282	0.46	4.56	459213	7.19349e+06
509.4	230	525.6	119.6	509.1	165.7	2	304	0	0.1	459218	7.19349e+06
514.4	235.8	530.2	117.9	507.6	165.9	3	271	0.33	4.28	459223	7.19349e+06
516.9	238.7	534.8	117	506.9	166.2	4	256	0	0.04	459228	7.19349e+06
0	171.9	10.6	55.7	7.7	148.9	9	73	0.15	0.44	458678	7.19349e+06
60.2	146.3	66.2	18.6	66.9	148.9	2	254	0	0.31	458738	7.19349e+06
63.4	144.8	70.6	17.2	70.3	149.2	6	237	0.26	1.17	458743	7.19349e+06
69.8	144.2	75.1	10.9	77.1	149.2	2	164	0.02	0.51	458748	7.19349e+06
73	142.6	79.6	7.7	80.4	149.4	7	249	0.02	1.91	458753	7.19349e+06
79.6	141.2	84.2	3.4	87.2	149.5	3	232	0.74	6.58	458758	7.19349e+06
82.8	140.6	88.7	0	90.4	149.7	1	183	0.28	3.16	458763	7.19349e+06
89.5	139.6	97.9	3.4	97	150.2	2	61	0.63	5.89	458768	7.19349e+06
92.8	138.3	102.3	0	100.3	150.2	2	54	0.05	0.31	458773	7.19349e+06
96.1	135.9	106.8	0	103.7	150.3	5	270	0.72	11.41	458778	7.19349e+06
102.8	130.4	111.2	6.9	110.1	150.5	3	130	0.87	13.83	458783	7.19349e+06
106.2	124.9	115.7	9.7	113.3	150.5	5	254	0.65	9.07	458788	7.19349e+06
112.9	122.2	120.2	15.4	119.9	150.5	4	273	0.75	9.41	458793	7.19349e+06
116.2	116.7	124.7	18.6	123.1	150.8	2	206	0.86	10.61	458798	7.19349e+06
123	111.4	129.2	25.1	129.7	150.9	2	0	0.33	3.09	458803	7.19349e+06
126.4	108.7	133.8	28.4	133	150.9	3	300	0.71	13.05	458808	7.19349e+06
133.1	103.4	138.3	35.1	139.6	151.1	2	254	0.71	9.33	458813	7.19349e+06
136.3	98.3	142.9	38.5	143	151	3	248	0.73	11.73	458818	7.19349e+06
139.5	95.7	147.5	41.6	146.3	151.1	1	233	0.79	9.63	458823	7.19349e+06
146	90.7	152.1	47.9	152.9	151.2	3	83	0.75	8.15	458828	7.19349e+06
149.3	85.8	156.7	50.9	156.3	151.2	0	243	0.78	7.83	458833	7.19349e+06
155.8	83.4	161.3	46.9	163	151.2	4	272	0.56	6.1	458838	7.19349e+06
159.1	78.7	165.9	44.9	166.3	151.4	2	209	0.73	5.97	458843	7.19349e+06
165.7	74.3	170.6	41.5	173	151.2	1	276	0.92	6.5	458848	7.19349e+06
169	72.1	175.2	39.3	176.4	151.3	3	315	0.82	6.51	458853	7.19349e+06
175.6	67.9	179.8	35.5	183.1	151.3	1	18	0.94	6.03	458858	7.19349e+06
178.9	63.8	189.1	33.9	186.4	151.3	2	97	0.87	5.25	458863	7.19349e+06
185.6	61.8	193.4	31.8	192.9	151.3	2	279	0.84	6.62	458868	7.19349e+06
188.9	58.2	197.8	30.8	196.1	151.3	1	105	0.85	10.35	458873	7.19349e+06
192.2	55.1	202.1	29.4	199.4	151.2	1	187	0.49	8.31	458878	7.19349e+06
198.9	53.4	206.5	26.2	206	151.2	1	342	0.8	9.01	458883	7.19349e+06
202.3	49.9	210.8	24.8	209.3	151.4	2	23	0.53	9.03	458888	7.19349e+06
208.9	47	215.2	19.5	215.9	151.4	1	259	0.67	10.29	458893	7.19349e+06
212.3	45.7	219.7	17.2	219	151.4	4	9	0.7	8.55	458898	7.19349e+06
219	43.7	224.1	14.2	225.3	151.5	2	346	0.85	10.87	458903	7.19349e+06
222.2	42.4	228.5	13.8	228.5	151.6	1	320	0.77	9.72	458908	7.19349e+06
228.5	42.1	233	13.8	234.8	151.8	3	272	0.78	8.77	458913	7.19349e+06
231.7	42.1	237.4	13.8	238	152	3	304	0	0.25	458918	7.19349e+06
238	41.8	241.9	10.9	244.4	151.8	1	180	0.49	6.26	458923	7.19349e+06
241.2	40.8	246.4	10.3	247.6	151.9	3	306	0.7	11.02	458928	7.19349e+06
244.4	39.5	250.9	10.3	250.9	152.1	2	324	0.65	12.39	458933	7.19349e+06
250.9	39	255.4	9.7	257.3	152.3	3	333	0.54	8.87	458938	7.19349e+06
254.1	39.1	259.9	7.7	260.5	152.6	4	347	0.81	6.04	458943	7.19349e+06
260.5	39.5	264.4	6.9	267	152.5	3	341	0.57	5.73	458948	7.19349e+06
263.8	39	268.9	6.9	270.3	152.6	2	282	0.29	4.89	458953	7.19349e+06
270.3	39	278	3.4	276.8	152.7	2	88	0.43	7.97	458958	7.19349e+06
273.5	39.1	282.5	3.4	280	152.8	3	345	0.61	6.06	458963	7.19349e+06
280	40	287	3.4	286.6	152.8	2	293	0.33	1.84	458968	7.19349e+06
283.3	40.8	291.5	4.9	289.9	153	4	304	0.73	8.4	458973	7.19349e+06
286.6	43	295.9	6.9	293.1	153.1	2	180	0.54	5.66	458978	7.19349e+06
293.1	45.8	300.4	9.7	299.7	153.2	3	301	0.68	12.16	458983	7.19349e+06
296.4	47.4	305	12.4	303	153.3	4	24	0.5	8.42	458988	7.19349e+06
303	51.1	309.5	17.2	309.5	153.4	3	17	0.57	9.29	458993	7.19349e+06
306.2	55.2	314	19.5	312.7	153.7	8	254	0.88	4.38	458998	7.19349e+06
312.7	56.4	318.5	24.4	319.3	154	6	249	0.84	5.38	459003	7.19349e+06
316	58.9	323.1	26.9	322.5	154.2	4	343	0.86	3.93	459008	7.19349e+06
322.5	60.7	327.5	31.8	329.1	154.3	5	354	0.89	5.8	459013	7.19349e+06
325.8	61.8	332	31.2	332.4	154.2	4	336	0.52	4.54	459018	7.19349e+06
332.4	64.4	336.5	24.4	338.9	154.6	7	287	0.7	6.9	459023	7.19349e+06
335.7	67.4	341	21	342.2	154.7	7	110	0.59	5.24	459028	7.19349e+06
339	69.1	345.5	17.6	345.4	154.6	2	18	0.7	9.21	459033	7.19349e+06
345.6	72.6	350	10.9	352	154.5	2	132	0.23	5.15	459038	7.19349e+06
348.9	76.5	354.5	7.7	355.2	154.7	6	267	0.72	13.55	459043	7.19349e+06
355.5	78.5	359.1	3.4	361.8	155.3	6	274	0	0.18	459048	7.19349e+06
358.8	82.8	368.1	0	365.1	155.5	6	236	0	0.14	459053	7.19349e+06
365.4	87.2	372.7	4.9	371.7	156.4	16	295	0.15	8.36	459058	7.19349e+06
368.7	89.5	377.2	7.7	374.9	157.7	9	275	0.75	19.53	459063	7.19349e+06
375.4	94.2	381.8	12.4	381.5	158.4	10	323	0.93	19.83	459068	7.19349e+06
378.7	99	386.3	12.4	384.8	158.4	10	349	0.08	2.53	459073	7.19349e+06
382	101.5	390.9	9.7	388.1	159.2	13	266	0.84	10.89	459078	7.19349e+06
388.7	106.5	395.4	3.4	394.8	159.4	2	60	0.05	3.89	459083	7.19349e+06
392	111.6	400	0	398.1	159.5	2	324	0	0.1	459088	7.19349e+06
398.7	114.2	404.6	6.9	404.7	159.6	2	285	0	0.13	459093	7.19349e+06
402	119.5	409.2	10.3	408	159.8	1	305	0	0.05	459098	7.19349e+06
408.7	124.8	413.7	17.2	414.6	160	4	311	0	0.15	459103	7.19349e+06
412	127.5	418.3	20.7	418	160.2	6	320	0	0.23	459108	7.19349e+06
418.7	132.9	422.9	27.6	424.6	160.7	6	299	0.03	0.26	459113	7.19349e+06
422.1	138.3	427.5	30.8	428	161	6	304	0	0.13	459118	7.19349e+06
428.8	141	432.1	37.1	434.6	161.2	3	348	0	0.09	459123	7.19349e+06
432.1	146.5	436.7	40.3	437.9	161.5	6	302	0	0.21	459128	7.19349e+06
435.5	152.1	441.3	43.6	441.3	161.9	7	300	0	0.29	459133	7.19349e+06
442.2	154.9	445.9	50.2	448	162.3	4	351	0	0.14	459138	7.19349e+06
445.5	160.5	450.5	53.5	451.3	162.4	6	336	0	0.2	459143	7.19349e+06
452.2	166.1	455.1	60.2	458	162.8	6	297	0	0.15	459148	7.19349e+06
455.6	168.9	464.3	63.5	461.3	162.7	2	233	0	0.22	459153	7.19349e+06
462.3	174.6	469	70.3	468	162.8	4	342	0	0.19	459158	7.19349e+06
465.7	180.3	473.6	73.7	471.4	162.9	6	358	0	0.19	459163	7.19349e+06
470.4	183.1	478.2	80.4	478.1	162.9	4	338	0	0.1	459168	7.19349e+06
472.8	188.8	482.8	83.8	481.4	163	4	278	0	0.15	459173	7.19349e+06
477.6	194.5	487.5	90.6	488.1	163.3	4	263	0	0.2	459178	7.19349e+06
480	197.4	492.1	94.1	491.5	163.8	6	279	0	0.2	459183	7.19349e+06
482.4	203	496.7	97.3	494.9	164.3	6	273	0	0.24	459188	7.19349e+06
487.3	208.7	501.4	103.7	501.6	164.5	4	293	0	0.16	459193	7.19349e+06
489.8	211.6	506	106.9	504.9	164.8	4	285	0	0.18	459198	7.19349e+06
494.7	217.3	510.6	111.1	505.6	165.1	4	301	0	0.19	459203	7.19349e+06
497.2	223	515.3	111.6	504.8	165.3	3	309	0	0.18	459208	7.19349e+06
502.1	225.9	519.9	112.9	503.1	165.5	3	323	0	0.13	459213	7.19349e+06
504.7	231.6	524.6	112.9	502.3	165.7	3	251	0	0.15	459218	7.19349e+06
509.7	237.4	529.2	111.2	500.8	165.8	3	232	0	0.13	459223	7.19349e+06
512.3	240.2	533.9	110.3	500.1	166.1	3	245	0	0.18	459228	7.19349e+06
0	177.2	9.5	57	6.9	149.6	11	62	0	0.11	458678	7.19348e+06
62.1	150.7	69.2	18.6	69.7	148.9	3	2	0.22	0.28	458743	7.19348e+06
68.7	150	73.7	12.4	76.3	149.2	5	170	0.32	1.48	458748	7.19348e+06
72	148.4	78.3	9.7	79.6	149.4	3	317	0.06	0.19	458753	7.19348e+06
78.6	147.1	83	3.4	86.1	149.5	2	266	0	0.18	458758	7.19348e+06
81.9	146.5	87.3	0	89.5	149.7	1	266	0.41	2.53	458763	7.19348e+06
88.6	145.5	96.2	3.4	96	150	2	284	0.72	5.39	458768	7.19348e+06
91.9	141	100.7	3.4	99.2	150.2	4	111	0.35	10.61	458773	7.19348e+06
95.3	138.3	105.2	0	102.5	150.2	1	236	0.14	7.65	458778	7.19348e+06
102	132.9	109.7	4.9	109	150.4	3	66	0.88	14.51	458783	7.19348e+06
105.4	127.5	114.2	7.7	112.2	150.4	0	198	0	0.29	458788	7.19348e+06
112.2	124.8	118.8	14.2	118.8	150.6	3	301	0.63	11.75	458793	7.19348e+06
115.5	119.5	123.3	17.6	122.1	150.7	3	262	0.29	9.8	458798	7.19348e+06
122.1	114.2	127.9	24.4	128.7	150.9	1	283	0.58	13.2	458803	7.19348e+06
125.4	111.6	132.5	27.8	132.1	150.9	2	187	0.69	9.33	458808	7.19348e+06
131.9	106.5	137.1	33.9	138.7	151	2	103	0.75	11.24	458813	7.19348e+06
135.1	101.5	141.7	37.1	142.1	151	4	299	0.79	13.36	458818	7.19348e+06
138.4	99	146.3	40.2	145.4	151.1	4	171	0.54	8.35	458823	7.19348e+06
144.9	94.2	151	46.2	152.1	151.1	2	22	0.88	8.15	458828	7.19348e+06
148.2	89.5	155.6	49.3	155.5	151.2	6	294	0.82	7.38	458833	7.19348e+06
154.8	87.2	160.3	49.7	162.2	151.1	3	292	0.78	7.77	458838	7.19348e+06
158.1	82.8	164.9	47.9	165.6	151.3	0	349	0.8	7.2	458843	7.19348e+06
164.7	78.5	169.6	44.1	172.2	151.2	2	167	0.82	5.94	458848	7.19348e+06
168	76.4	174.2	42.1	175.5	151.2	2	197	0.91	6.97	458853	7.19348e+06
174.7	72.2	178.5	38.5	182	151.3	4	332	0.9	5.81	458858	7.19348e+06
178	68.4	187.1	37.1	185.2	151.3	2	270	0.75	5.88	458863	7.19348e+06
184.7	66.6	191.5	35.1	191.8	151.3	1	17	0.84	6.37	458868	7.19348e+06
188	63.3	195.9	33.9	195.1	151.4	2	212	0.85	6.94	458873	7.19348e+06
191.4	60	200.3	32.5	198.4	151.3	2	356	0.8	9.97	458878	7.19348e+06
198.1	58.2	204.7	29.4	205	151.3	3	344	0.71	11.02	458883	7.19348e+06
201.5	55.1	209.1	26.9	208.2	151.3	3	202	0.68	12.38	458888	7.19348e+06
208.2	52.4	213.5	22.1	214.5	151.5	2	153	0.81	13.5	458893	7.19348e+06
211.3	51.3	218	20.1	217.6	151.5	2	257	0.5	10.71	458898	7.19348e+06
217.6	49.5	222.4	17.6	224	151.6	3	264	0.68	10.83	458903	7.19348e+06
220.8	48.4	226.9	17.2	227.2	151.6	3	339	0.67	8.9	458908	7.19348e+06
227.2	48.1	231.4	17.2	233.6	151.9	0	31	0.56	7.03	458913	7.19348e+06
230.4	48.1	235.9	17.2	236.8	152	6	257	0.88	7.57	458918	7.19348e+06
236.8	47.4	240.4	14.2	243.2	152.1	3	2	0.66	5.92	458923	7.19348e+06
240	46.6	244.9	13.8	246.4	152.2	5	280	0.45	5.77	458928	7.19348e+06
243.2	45.4	249.4	13.8	249.7	152.3	2	261	0.45	5.16	458933	7.19348e+06
249.7	45	253.9	12.4	256.1	152.4	5	23	0.77	7.56	458938	7.19348e+06
252.9	45.1	258.5	10.9	259.4	152.6	2	310	0.46	5.59	458943	7.19348e+06
259.4	45.4	263	10.3	265.9	152.6	3	273	0.8	6.34	458948	7.19348e+06
262.6	45	267.5	9.7	269.2	152.8	1	356	0.56	5.5	458953	7.19348e+06
269.2	45	276.4	6.9	275.7	152.9	5	330	0.74	5.64	458958	7.19348e+06
272.4	45.1	280.9	6.9	279	152.9	2	173	0.48	3.62	458963	7.19348e+06
279	45.9	285.4	6.9	285.5	152.9	3	329	0.38	4.92	458968	7.19348e+06
282.2	46.6	289.9	7.7	288.8	153.3	5	326	0.68	5.27	458973	7.19348e+06
285.5	48.5	294.5	9.7	292.1	153.3	6	297	0.54	5.37	458978	7.19348e+06
292.1	51	299	12.4	298.6	153.5	7	316	0.42	10.21	458983	7.19348e+06
295.3	52.5	303.5	14.6	301.8	153.4	4	314	0.6	11.8	458988	7.19348e+06
301.8	55.8	308.1	19.5	308.4	153.7	1	86	0.75	15.1	458993	7.19348e+06
305.1	59.5	312.5	22.1	311.7	153.6	1	186	0.88	10.36	458998	7.19348e+06
311.7	61.6	317	26.9	318.2	154	3	297	0.92	6.15	459003	7.19348e+06
314.9	64.4	321.5	29.2	321.5	154.4	4	260	0.79	6.76	459008	7.19348e+06
321.5	66.4	326	34.1	328	154.7	1	329	0.77	3.78	459013	7.19348e+06
324.8	67.4	330.5	31	331.3	154.7	3	323	0.82	4.48	459018	7.19348e+06
331.4	69.8	335	24.1	337.8	154.9	2	334	0.69	4.31	459023	7.19348e+06
334.7	72.6	339.5	20.7	341.1	154.8	3	277	0.26	4.05	459028	7.19348e+06
338	74.1	344	17.2	344.3	155	8	111	0.47	5.69	459033	7.19348e+06
344.6	77.4	348.6	10.3	350.9	154.7	4	343	0.64	3.84	459038	7.19348e+06
347.9	81.1	353.1	6.9	354.2	154.6	3	298	0.05	0.28	459043	7.19348e+06
354.5	83	357.6	0	360.8	155.2	3	246	0	0.08	459048	7.19348e+06
357.8	87	366.7	0	364.1	155.6	6	248	0.15	4.81	459053	7.19348e+06
364.5	91.2	371.3	6.9	370.6	156.7	18	249	0.6	13.34	459058	7.19348e+06
367.8	93.4	375.9	9.7	373.9	157.9	11	284	0.85	15.1	459063	7.19348e+06
374.5	97.9	380.4	10.3	380.6	158.8	4	269	0.7	6.05	459068	7.19348e+06
377.8	102.6	385	10.3	383.9	159	6	313	0.21	5.39	459073	7.19348e+06
381.1	105	389.6	7.7	387.2	159.4	9	328	0.74	6.92	459078	7.19348e+06
387.8	109.9	394.1	3.4	393.8	159.6	1	145	0.24	2.97	459083	7.19348e+06
391.1	114.8	398.7	0	397.1	159.6	2	248	0	0.16	459088	7.19348e+06
397.8	117.3	403.3	6.9	403.8	159.6	0	180	0	0.08	459093	7.19348e+06
401.2	122.5	407.9	10.3	407.1	159.7	4	233	0	0.15	459098	7.19348e+06
407.8	127.6	412.5	17.2	413.7	160.3	8	298	0	0.24	459103	7.19348e+06
411.2	130.3	417.1	20.7	417.1	160.7	7	321	0.91	5.5	459108	7.19348e+06
417.9	135.5	421.7	27.6	423.7	160.9	4	323	0.12	2.45	459113	7.19348e+06
421.3	140.9	426.3	31	427.1	161.1	4	290	0	0.12	459118	7.19348e+06
428	143.6	430.9	37.9	433.8	161.4	3	283	0	0.17	459123	7.19348e+06
[truncated: 15,989 more rows]
