# Supplementary material for: High-resolution prediction of American red squirrel in Interior Alaska: a role model for conservation using open access data, machine learning, GIS and LIDAR
Source: PeerJ. 2021 Sep 14;9:e11830. doi: 10.7717/peerj.11830 (PMC8447940; doi:10.7717/peerj.11830)
Supplement: Supplemental Information 3 — The calculated RIO prediction for each point of the lattice grid. PROB_0 shows the probability for “no midden occurring”; PROB_1 shows the probability for the opposite event. [file peerj-09-11830-s003.xlsx]

## Sheet: Data
CASEID	RESPONSE	PROB_0	PROB_1	PREDICTION	XCORD	YCORD
1	-0.932204	0.86581	0.13419	0	459053	7.19365e+06
2	-0.134773	0.566981	0.433019	0	459048	7.19365e+06
3	-0.290173	0.641147	0.358853	0	459053	7.19365e+06
4	-0.963409	0.872897	0.127103	0	459058	7.19365e+06
5	-0.892951	0.856424	0.143576	0	459043	7.19364e+06
6	-0.533938	0.744193	0.255807	0	459048	7.19364e+06
7	-0.874243	0.851762	0.148238	0	459053	7.19364e+06
8	-0.954643	0.870939	0.129061	0	459058	7.19364e+06
9	-0.919997	0.862948	0.137052	0	459063	7.19364e+06
10	-0.129789	0.564532	0.435468	0	459043	7.19364e+06
11	-0.897557	0.857553	0.142447	0	459048	7.19364e+06
12	-0.278301	0.635666	0.364334	0	459053	7.19364e+06
13	-0.888888	0.855422	0.144578	0	459058	7.19364e+06
14	-0.592174	0.765729	0.234271	0	459063	7.19364e+06
15	-0.44198	0.707642	0.292358	0	459068	7.19364e+06
16	-0.998605	0.880504	0.119496	0	459073	7.19364e+06
17	-0.816439	0.836563	0.163437	0	459038	7.19363e+06
18	-0.236051	0.615881	0.384119	0	459043	7.19363e+06
19	-0.685076	0.797405	0.202595	0	459048	7.19363e+06
20	-0.227049	0.611613	0.388387	0	459053	7.19363e+06
21	-0.533803	0.744141	0.255859	0	459058	7.19363e+06
22	-0.632074	0.779739	0.220261	0	459063	7.19363e+06
23	-0.793605	0.830223	0.169777	0	459068	7.19363e+06
24	-0.863873	0.849124	0.150876	0	459073	7.19363e+06
25	-0.000198065	0.500099	0.499901	0	459033	7.19363e+06
26	-0.293612	0.642728	0.357272	0	459038	7.19363e+06
27	-0.956347	0.871322	0.128678	0	459043	7.19363e+06
28	-0.781216	0.826702	0.173298	0	459048	7.19363e+06
29	-0.630062	0.779047	0.220953	0	459053	7.19363e+06
30	-0.687061	0.798045	0.201955	0	459058	7.19363e+06
31	-0.764658	0.821906	0.178094	0	459063	7.19363e+06
32	-0.810308	0.83488	0.16512	0	459068	7.19363e+06
33	-0.887914	0.855181	0.144819	0	459073	7.19363e+06
34	-0.857136	0.84739	0.15261	0	459033	7.19362e+06
35	-0.9745	0.875338	0.124662	0	459038	7.19362e+06
36	-0.451818	0.711696	0.288304	0	459043	7.19362e+06
37	-0.32915	0.658878	0.341122	0	459048	7.19362e+06
38	-0.917063	0.862252	0.137748	0	459053	7.19362e+06
39	0.0604914	0.469791	0.530209	1	459058	7.19362e+06
40	-0.00995245	0.504976	0.495024	0	459063	7.19362e+06
41	-0.639094	0.782141	0.217859	0	459068	7.19362e+06
42	-0.251563	0.623194	0.376806	0	459073	7.19362e+06
43	-0.836952	0.842096	0.157904	0	458858	7.19362e+06
44	-0.0430282	0.521501	0.478499	0	459028	7.19362e+06
45	-0.957262	0.871527	0.128473	0	459033	7.19362e+06
46	-0.226032	0.61113	0.38887	0	459038	7.19362e+06
47	-0.90667	0.859765	0.140235	0	459043	7.19362e+06
48	-0.806799	0.83391	0.16609	0	459048	7.19362e+06
49	-0.526898	0.741503	0.258497	0	459053	7.19362e+06
50	0.0926655	0.453799	0.546201	1	459058	7.19362e+06
51	-0.714147	0.806635	0.193365	0	459063	7.19362e+06
52	-0.0146901	0.507345	0.492655	0	459068	7.19362e+06
53	-0.180881	0.589467	0.410533	0	459073	7.19362e+06
54	-0.807423	0.834083	0.165917	0	458848	7.19361e+06
55	-0.0276905	0.513842	0.486158	0	458853	7.19361e+06
56	-0.842223	0.843492	0.156508	0	458858	7.19361e+06
57	-0.942671	0.868223	0.131777	0	459028	7.19361e+06
58	-0.261331	0.62777	0.37223	0	459033	7.19361e+06
59	-0.457562	0.714048	0.285952	0	459038	7.19361e+06
60	-0.879286	0.853031	0.146969	0	459043	7.19361e+06
61	-0.892924	0.856418	0.143582	0	459048	7.19361e+06
62	0.129071	0.43582	0.56418	1	459053	7.19361e+06
63	0.0463125	0.47686	0.52314	1	459058	7.19361e+06
64	0.0152008	0.4924	0.5076	1	459063	7.19361e+06
65	-0.130146	0.564708	0.435292	0	459068	7.19361e+06
66	-0.113788	0.55665	0.44335	0	459073	7.19361e+06
67	-0.888124	0.855233	0.144767	0	458838	7.19361e+06
68	-0.811936	0.835328	0.164672	0	458843	7.19361e+06
69	-0.783385	0.827323	0.172677	0	458848	7.19361e+06
70	-0.826352	0.839256	0.160744	0	458853	7.19361e+06
71	-0.810877	0.835037	0.164963	0	458858	7.19361e+06
72	-0.821502	0.837943	0.162057	0	458863	7.19361e+06
73	-0.16671	0.582591	0.417409	0	459023	7.19361e+06
74	-0.389778	0.685584	0.314416	0	459028	7.19361e+06
75	-0.886799	0.854905	0.145095	0	459033	7.19361e+06
76	-0.0736665	0.536767	0.463233	0	459038	7.19361e+06
77	-0.02657	0.513282	0.486718	0	459043	7.19361e+06
78	-0.400464	0.690173	0.309827	0	459048	7.19361e+06
79	-0.85484	0.846795	0.153205	0	459053	7.19361e+06
80	0.0449728	0.477529	0.522471	1	459058	7.19361e+06
81	-0.315669	0.652793	0.347207	0	459063	7.19361e+06
82	-0.958737	0.871856	0.128144	0	459068	7.19361e+06
83	-0.948185	0.86948	0.13052	0	459073	7.19361e+06
84	-1.01258	0.883413	0.116587	0	459078	7.19361e+06
85	-0.941602	0.867979	0.132021	0	459178	7.19361e+06
86	-0.943014	0.868302	0.131698	0	459183	7.19361e+06
87	-0.177937	0.588041	0.411959	0	458833	7.1936e+06
88	-0.757346	0.819756	0.180244	0	458838	7.1936e+06
89	-0.756999	0.819653	0.180347	0	458843	7.1936e+06
90	-0.813045	0.835633	0.164367	0	458848	7.1936e+06
91	-0.677114	0.79482	0.20518	0	458853	7.1936e+06
92	-0.671994	0.793145	0.206855	0	458858	7.1936e+06
93	-0.205347	0.601254	0.398746	0	458863	7.1936e+06
94	-0.313373	0.651751	0.348249	0	459018	7.1936e+06
95	-0.234673	0.615229	0.384771	0	459023	7.1936e+06
96	-0.199696	0.598541	0.401459	0	459028	7.1936e+06
97	-0.0847553	0.542276	0.457724	0	459033	7.1936e+06
98	-0.0140905	0.507045	0.492955	0	459038	7.1936e+06
99	0.0192444	0.490379	0.509621	1	459043	7.1936e+06
100	-0.063873	0.531893	0.468107	0	459048	7.1936e+06
101	0.0217524	0.489126	0.510874	1	459053	7.1936e+06
102	-0.813814	0.835844	0.164156	0	459058	7.1936e+06
103	-0.892207	0.856241	0.143759	0	459063	7.1936e+06
104	-0.718608	0.808023	0.191977	0	459068	7.1936e+06
105	-0.215074	0.605909	0.394091	0	459073	7.1936e+06
106	-0.995363	0.87982	0.12018	0	459078	7.1936e+06
107	-0.943014	0.868302	0.131698	0	459173	7.1936e+06
108	-0.948215	0.869487	0.130513	0	459178	7.1936e+06
109	-0.943014	0.868302	0.131698	0	459183	7.1936e+06
110	-0.943014	0.868302	0.131698	0	459188	7.1936e+06
111	-0.926392	0.864454	0.135546	0	458823	7.1936e+06
112	-0.922398	0.863515	0.136485	0	458828	7.1936e+06
113	-0.849398	0.845378	0.154622	0	458833	7.1936e+06
114	-0.869181	0.850479	0.149521	0	458838	7.1936e+06
115	-0.861576	0.848534	0.151466	0	458843	7.1936e+06
116	-0.943523	0.868418	0.131582	0	458848	7.1936e+06
117	-0.658787	0.788778	0.211222	0	458853	7.1936e+06
118	-0.886407	0.854807	0.145193	0	458858	7.1936e+06
119	-0.0730869	0.536478	0.463522	0	458863	7.1936e+06
120	-0.582596	0.762275	0.237725	0	458868	7.1936e+06
121	-0.597277	0.767554	0.232446	0	459013	7.1936e+06
122	-0.937616	0.867062	0.132938	0	459018	7.1936e+06
123	-0.219065	0.607813	0.392187	0	459023	7.1936e+06
124	-0.200169	0.598769	0.401231	0	459028	7.1936e+06
125	0.0201082	0.489947	0.510053	1	459033	7.1936e+06
126	0.0405396	0.479741	0.520259	1	459038	7.1936e+06
127	-0.205719	0.601432	0.398568	0	459043	7.1936e+06
128	-0.824171	0.838667	0.161333	0	459048	7.1936e+06
129	-0.0529831	0.526467	0.473533	0	459053	7.1936e+06
130	-0.820393	0.837642	0.162358	0	459058	7.1936e+06
131	-0.752902	0.818439	0.181561	0	459063	7.1936e+06
132	-0.039706	0.519843	0.480157	0	459068	7.1936e+06
133	-0.968927	0.874116	0.125884	0	459073	7.1936e+06
134	-1.01107	0.883102	0.116898	0	459078	7.1936e+06
135	-0.923776	0.863839	0.136161	0	459163	7.1936e+06
136	-0.939557	0.867509	0.132491	0	459168	7.1936e+06
137	-0.935633	0.866605	0.133395	0	459173	7.1936e+06
138	-0.943189	0.868342	0.131658	0	459178	7.1936e+06
139	-0.943014	0.868302	0.131698	0	459183	7.1936e+06
140	-0.949074	0.869682	0.130318	0	459188	7.1936e+06
141	-0.943572	0.86843	0.13157	0	458813	7.19359e+06
142	-0.887036	0.854963	0.145037	0	458818	7.19359e+06
143	-0.893651	0.856596	0.143404	0	458823	7.19359e+06
144	-0.898735	0.857841	0.142159	0	458828	7.19359e+06
145	-0.883737	0.854143	0.145857	0	458833	7.19359e+06
146	-0.884588	0.854355	0.145645	0	458838	7.19359e+06
147	-0.735688	0.813266	0.186734	0	458843	7.19359e+06
148	-0.119488	0.559461	0.440539	0	458848	7.19359e+06
149	-0.0578498	0.528893	0.471107	0	458853	7.19359e+06
150	0.00874748	0.495626	0.504374	1	458858	7.19359e+06
151	-0.188231	0.593019	0.406981	0	458863	7.19359e+06
152	-0.626707	0.77789	0.22211	0	458868	7.19359e+06
153	-0.578996	0.760968	0.239032	0	458873	7.19359e+06
154	-0.799285	0.831819	0.168181	0	458878	7.19359e+06
155	-0.9468	0.869165	0.130835	0	459013	7.19359e+06
156	-0.0499527	0.524956	0.475044	0	459018	7.19359e+06
157	-0.463023	0.716272	0.283728	0	459023	7.19359e+06
158	-0.678897	0.795401	0.204599	0	459028	7.19359e+06
159	-0.0690086	0.53445	0.46555	0	459033	7.19359e+06
160	0.0279288	0.486039	0.513961	1	459038	7.19359e+06
161	0.19859	0.40199	0.59801	1	459043	7.19359e+06
162	0.0410547	0.479484	0.520516	1	459048	7.19359e+06
163	0.0013402	0.49933	0.50067	1	459053	7.19359e+06
164	-0.118555	0.559001	0.440999	0	459058	7.19359e+06
165	-0.0584326	0.529183	0.470817	0	459063	7.19359e+06
166	-0.0960512	0.547878	0.452122	0	459068	7.19359e+06
167	-0.278089	0.635568	0.364432	0	459073	7.19359e+06
168	-1.00667	0.88219	0.11781	0	459078	7.19359e+06
169	-0.907419	0.859946	0.140054	0	459153	7.19359e+06
170	-0.918737	0.86265	0.13735	0	459158	7.19359e+06
171	-0.934234	0.866281	0.133719	0	459163	7.19359e+06
172	-0.937897	0.867127	0.132873	0	459168	7.19359e+06
173	-0.933498	0.86611	0.13389	0	459173	7.19359e+06
174	-0.949074	0.869682	0.130318	0	459178	7.19359e+06
175	-0.943014	0.868302	0.131698	0	459183	7.19359e+06
176	-0.938819	0.86734	0.13266	0	459188	7.19359e+06
177	-0.866834	0.849881	0.150119	0	458803	7.19359e+06
178	-0.846192	0.844537	0.155463	0	458808	7.19359e+06
179	-0.832582	0.84093	0.15907	0	458813	7.19359e+06
180	-0.864199	0.849207	0.150793	0	458818	7.19359e+06
181	-0.898457	0.857773	0.142227	0	458823	7.19359e+06
182	-0.778174	0.825829	0.174171	0	458828	7.19359e+06
183	-0.0193617	0.50968	0.49032	0	458833	7.19359e+06
184	0.033524	0.483244	0.516756	1	458838	7.19359e+06
185	0.204308	0.399244	0.600756	1	458843	7.19359e+06
186	0.128352	0.436174	0.563826	1	458848	7.19359e+06
187	-0.822482	0.838209	0.161791	0	458853	7.19359e+06
188	-0.916535	0.862127	0.137873	0	458858	7.19359e+06
189	-0.703825	0.803395	0.196605	0	458863	7.19359e+06
190	-0.659908	0.789151	0.210849	0	458868	7.19359e+06
191	-0.62222	0.776336	0.223664	0	458873	7.19359e+06
192	-0.688643	0.798555	0.201445	0	459008	7.19359e+06
193	-0.864576	0.849304	0.150696	0	459013	7.19359e+06
194	-0.203944	0.600581	0.399419	0	459018	7.19359e+06
195	-0.681066	0.796106	0.203894	0	459023	7.19359e+06
196	-0.619182	0.775279	0.224721	0	459028	7.19359e+06
197	-0.0501826	0.52507	0.47493	0	459033	7.19359e+06
198	-0.540683	0.746752	0.253248	0	459038	7.19359e+06
199	-0.0182588	0.509128	0.490872	0	459043	7.19359e+06
200	0.148995	0.426049	0.573951	1	459048	7.19359e+06
201	0.103622	0.448374	0.551626	1	459053	7.19359e+06
202	-0.905988	0.859601	0.140399	0	459058	7.19359e+06
203	-0.819545	0.837411	0.162589	0	459063	7.19359e+06
204	-0.824303	0.838703	0.161297	0	459068	7.19359e+06
205	-0.219601	0.608069	0.391931	0	459073	7.19359e+06
206	-0.980606	0.876664	0.123336	0	459078	7.19359e+06
207	-1.00873	0.882618	0.117382	0	459083	7.19359e+06
208	-0.989777	0.878634	0.121366	0	459143	7.19359e+06
209	-0.886474	0.854824	0.145176	0	459148	7.19359e+06
210	-0.889346	0.855535	0.144465	0	459153	7.19359e+06
211	-0.907498	0.859965	0.140035	0	459158	7.19359e+06
212	-0.920543	0.863077	0.136923	0	459163	7.19359e+06
213	-0.939557	0.867509	0.132491	0	459168	7.19359e+06
214	-0.939557	0.867509	0.132491	0	459173	7.19359e+06
215	-0.943014	0.868302	0.131698	0	459178	7.19359e+06
216	-0.949074	0.869682	0.130318	0	459183	7.19359e+06
217	-0.943014	0.868302	0.131698	0	459188	7.19359e+06
218	-0.947413	0.869305	0.130695	0	459193	7.19359e+06
219	-0.840913	0.843146	0.156854	0	458798	7.19358e+06
220	-0.813943	0.83588	0.16412	0	458803	7.19358e+06
221	-0.828366	0.839799	0.160201	0	458808	7.19358e+06
222	-0.834737	0.841506	0.158494	0	458813	7.19358e+06
223	-0.909603	0.860471	0.139529	0	458818	7.19358e+06
224	-0.902527	0.858763	0.141237	0	458823	7.19358e+06
225	-0.706879	0.804358	0.195642	0	458828	7.19358e+06
226	0.100395	0.44997	0.55003	1	458833	7.19358e+06
227	0.0774171	0.461369	0.538631	1	458838	7.19358e+06
228	-0.0903818	0.545068	0.454932	0	458843	7.19358e+06
229	-0.631294	0.779471	0.220529	0	458848	7.19358e+06
230	0.187081	0.407536	0.592464	1	458853	7.19358e+06
231	-0.0594233	0.529677	0.470323	0	458858	7.19358e+06
232	-0.782281	0.827007	0.172993	0	458863	7.19358e+06
233	-0.898864	0.857872	0.142128	0	458868	7.19358e+06
234	-0.759623	0.820428	0.179572	0	458873	7.19358e+06
235	-0.867966	0.85017	0.14983	0	458878	7.19358e+06
236	-0.98471	0.877549	0.122451	0	459003	7.19358e+06
237	-0.561577	0.754573	0.245427	0	459008	7.19358e+06
238	-0.601197	0.76895	0.23105	0	459013	7.19358e+06
239	-0.853935	0.84656	0.15344	0	459018	7.19358e+06
240	-0.183437	0.590704	0.409296	0	459023	7.19358e+06
241	-0.515356	0.737054	0.262946	0	459028	7.19358e+06
242	-0.110211	0.554883	0.445117	0	459033	7.19358e+06
243	-0.907226	0.859899	0.140101	0	459038	7.19358e+06
244	-0.0413992	0.520688	0.479312	0	459043	7.19358e+06
245	0.0853742	0.457416	0.542584	1	459048	7.19358e+06
246	0.101242	0.449551	0.550449	1	459053	7.19358e+06
247	-0.814632	0.836069	0.163931	0	459058	7.19358e+06
248	-0.74126	0.814953	0.185047	0	459063	7.19358e+06
249	-0.947801	0.869393	0.130607	0	459068	7.19358e+06
250	0.0410548	0.479484	0.520516	1	459073	7.19358e+06
251	-0.14026	0.569674	0.430326	0	459078	7.19358e+06
252	-1.01945	0.884822	0.115178	0	459083	7.19358e+06
253	-1.00698	0.882255	0.117745	0	459088	7.19358e+06
254	-1.02408	0.885762	0.114238	0	459138	7.19358e+06
255	-1.00257	0.881337	0.118663	0	459143	7.19358e+06
256	-0.891626	0.856098	0.143902	0	459148	7.19358e+06
257	-0.886474	0.854824	0.145176	0	459153	7.19358e+06
258	-0.898126	0.857692	0.142308	0	459158	7.19358e+06
259	-0.918911	0.862691	0.137309	0	459163	7.19358e+06
260	-0.923951	0.863881	0.136119	0	459168	7.19358e+06
261	-0.939987	0.867608	0.132392	0	459173	7.19358e+06
262	-0.939781	0.867561	0.132439	0	459178	7.19358e+06
263	-0.948215	0.869487	0.130513	0	459183	7.19358e+06
264	-0.943014	0.868302	0.131698	0	459188	7.19358e+06
265	-0.943014	0.868302	0.131698	0	459193	7.19358e+06
266	-0.857547	0.847496	0.152504	0	458788	7.19358e+06
267	-0.801451	0.832424	0.167576	0	458793	7.19358e+06
268	-0.896471	0.857288	0.142712	0	458798	7.19358e+06
269	-0.931719	0.865697	0.134303	0	458803	7.19358e+06
270	-0.894094	0.856705	0.143295	0	458808	7.19358e+06
271	-0.709493	0.805179	0.194821	0	458813	7.19358e+06
272	-0.926282	0.864428	0.135572	0	458818	7.19358e+06
273	-0.354716	0.670276	0.329724	0	458823	7.19358e+06
274	-0.80822	0.834303	0.165697	0	458828	7.19358e+06
275	-0.907983	0.860081	0.139919	0	458833	7.19358e+06
276	-0.927823	0.864789	0.135211	0	458838	7.19358e+06
277	-0.738099	0.813998	0.186002	0	458843	7.19358e+06
278	-0.876618	0.85236	0.14764	0	458848	7.19358e+06
279	-0.668444	0.791978	0.208022	0	458853	7.19358e+06
280	-0.75356	0.818634	0.181366	0	458858	7.19358e+06
281	-0.731223	0.811907	0.188093	0	458863	7.19358e+06
282	-0.682303	0.796507	0.203493	0	458868	7.19358e+06
283	-0.761031	0.820842	0.179158	0	458873	7.19358e+06
284	-0.113188	0.556353	0.443647	0	458878	7.19358e+06
285	-0.693018	0.799959	0.200041	0	458998	7.19358e+06
286	-0.951464	0.870223	0.129777	0	459003	7.19358e+06
287	-0.997162	0.8802	0.1198	0	459008	7.19358e+06
288	-0.0471758	0.52357	0.47643	0	459013	7.19358e+06
289	-0.062317	0.531118	0.468882	0	459018	7.19358e+06
290	0.0573685	0.471347	0.528653	1	459023	7.19358e+06
291	-0.86048	0.848252	0.151748	0	459028	7.19358e+06
292	0.048945	0.475547	0.524453	1	459033	7.19358e+06
293	0.0318389	0.484086	0.515914	1	459038	7.19358e+06
294	-0.834919	0.841554	0.158446	0	459043	7.19358e+06
295	-0.0864841	0.543135	0.456865	0	459048	7.19358e+06
296	-0.0101741	0.505087	0.494913	0	459053	7.19358e+06
297	-0.14676	0.572858	0.427142	0	459058	7.19358e+06
298	-0.794003	0.830335	0.169665	0	459063	7.19358e+06
299	-0.959522	0.872032	0.127968	0	459068	7.19358e+06
300	-0.474375	0.720864	0.279136	0	459073	7.19358e+06
301	-0.968018	0.873916	0.126084	0	459078	7.19358e+06
302	-0.905554	0.859496	0.140504	0	459083	7.19358e+06
303	-1.0085	0.88257	0.11743	0	459088	7.19358e+06
304	-0.920791	0.863136	0.136864	0	459128	7.19358e+06
305	-0.980524	0.876646	0.123354	0	459133	7.19358e+06
306	-1.01532	0.883978	0.116022	0	459138	7.19358e+06
307	-1.01449	0.883806	0.116194	0	459143	7.19358e+06
308	-0.969743	0.874296	0.125704	0	459148	7.19358e+06
309	-0.883462	0.854075	0.145925	0	459153	7.19358e+06
310	-0.907419	0.859946	0.140054	0	459158	7.19358e+06
311	-0.924796	0.864079	0.135921	0	459163	7.19358e+06
312	-0.929835	0.865258	0.134742	0	459168	7.19358e+06
313	-0.933673	0.866151	0.133849	0	459173	7.19358e+06
314	-0.932086	0.865782	0.134218	0	459178	7.19358e+06
315	-0.943014	0.868302	0.131698	0	459183	7.19358e+06
316	-0.943189	0.868342	0.131658	0	459188	7.19358e+06
317	-0.947413	0.869305	0.130695	0	459193	7.19358e+06
318	-0.686369	0.797822	0.202178	0	458778	7.19357e+06
319	-0.784816	0.827731	0.172269	0	458783	7.19357e+06
320	-0.851969	0.846048	0.153952	0	458788	7.19357e+06
321	-0.893526	0.856565	0.143435	0	458793	7.19357e+06
322	-0.949517	0.869782	0.130218	0	458798	7.19357e+06
323	-0.928802	0.865018	0.134982	0	458803	7.19357e+06
324	0.151432	0.424858	0.575142	1	458808	7.19357e+06
325	-0.969065	0.874146	0.125854	0	458813	7.19357e+06
326	-0.902082	0.858655	0.141345	0	458818	7.19357e+06
327	-0.902213	0.858687	0.141313	0	458823	7.19357e+06
328	-0.835024	0.841582	0.158418	0	458828	7.19357e+06
329	-0.00903725	0.504519	0.495481	0	458833	7.19357e+06
330	-0.757689	0.819857	0.180143	0	458838	7.19357e+06
331	-0.687724	0.798259	0.201741	0	458843	7.19357e+06
332	-0.373366	0.678466	0.321534	0	458848	7.19357e+06
333	-0.814718	0.836092	0.163908	0	458853	7.19357e+06
334	-0.0747487	0.537305	0.462695	0	458858	7.19357e+06
335	-0.798851	0.831697	0.168303	0	458863	7.19357e+06
336	-0.74223	0.815245	0.184755	0	458868	7.19357e+06
337	-0.720464	0.808598	0.191402	0	458873	7.19357e+06
338	-0.829565	0.840121	0.159879	0	458878	7.19357e+06
339	-0.169437	0.583917	0.416083	0	458883	7.19357e+06
340	-0.967126	0.873719	0.126281	0	459003	7.19357e+06
341	-0.253932	0.624306	0.375694	0	459008	7.19357e+06
342	0.0331265	0.483443	0.516557	1	459013	7.19357e+06
343	-0.929566	0.865196	0.134804	0	459018	7.19357e+06
344	-0.632567	0.779909	0.220091	0	459023	7.19357e+06
345	-0.900193	0.858196	0.141804	0	459028	7.19357e+06
346	-0.881465	0.853576	0.146424	0	459033	7.19357e+06
347	-0.0157983	0.507899	0.492101	0	459038	7.19357e+06
348	-0.850523	0.845671	0.154329	0	459043	7.19357e+06
349	-0.59034	0.76507	0.23493	0	459048	7.19357e+06
350	-0.405137	0.692168	0.307832	0	459053	7.19357e+06
351	-0.453219	0.712271	0.287729	0	459058	7.19357e+06
352	-0.749594	0.817453	0.182547	0	459063	7.19357e+06
353	-0.584112	0.762824	0.237176	0	459068	7.19357e+06
354	-0.193191	0.595411	0.404589	0	459073	7.19357e+06
355	-0.790295	0.829288	0.170712	0	459078	7.19357e+06
356	-0.923101	0.863681	0.136319	0	459083	7.19357e+06
357	-0.91897	0.862705	0.137295	0	459088	7.19357e+06
358	-1.00926	0.882729	0.117271	0	459093	7.19357e+06
359	-1.01685	0.884291	0.115709	0	459098	7.19357e+06
360	-0.9821	0.876987	0.123013	0	459118	7.19357e+06
361	-0.951358	0.870199	0.129801	0	459123	7.19357e+06
362	-0.938814	0.867338	0.132662	0	459128	7.19357e+06
363	-0.986408	0.877913	0.122087	0	459133	7.19357e+06
364	-1.02037	0.88501	0.11499	0	459138	7.19357e+06
365	-1.02325	0.885593	0.114407	0	459143	7.19357e+06
366	-0.990435	0.878774	0.121226	0	459148	7.19357e+06
367	-0.888218	0.855256	0.144744	0	459153	7.19357e+06
368	-0.883462	0.854075	0.145925	0	459158	7.19357e+06
369	-0.907323	0.859922	0.140078	0	459163	7.19357e+06
370	-0.923951	0.863881	0.136119	0	459168	7.19357e+06
371	-0.923951	0.863881	0.136119	0	459173	7.19357e+06
372	-0.939987	0.867608	0.132392	0	459178	7.19357e+06
373	-0.943189	0.868342	0.131658	0	459183	7.19357e+06
374	-0.943189	0.868342	0.131658	0	459188	7.19357e+06
375	-0.943014	0.868302	0.131698	0	459193	7.19357e+06
376	-0.949074	0.869682	0.130318	0	459198	7.19357e+06
377	-0.632178	0.779775	0.220225	0	458773	7.19357e+06
378	-0.860253	0.848194	0.151806	0	458778	7.19357e+06
379	-0.895973	0.857166	0.142834	0	458783	7.19357e+06
380	-0.939996	0.86761	0.13239	0	458788	7.19357e+06
381	-0.900343	0.858232	0.141768	0	458793	7.19357e+06
382	-0.824039	0.838631	0.161369	0	458798	7.19357e+06
383	-0.850687	0.845714	0.154286	0	458803	7.19357e+06
384	-0.918751	0.862653	0.137347	0	458808	7.19357e+06
385	-0.990665	0.878823	0.121177	0	458813	7.19357e+06
386	-0.169819	0.584103	0.415897	0	458818	7.19357e+06
387	-0.317781	0.653749	0.346251	0	458823	7.19357e+06
388	-0.986704	0.877977	0.122023	0	458828	7.19357e+06
389	-0.740767	0.814804	0.185196	0	458833	7.19357e+06
390	-0.11162	0.555579	0.444421	0	458838	7.19357e+06
391	-0.0126508	0.506325	0.493675	0	458843	7.19357e+06
392	-0.830431	0.840354	0.159646	0	458848	7.19357e+06
393	-0.687189	0.798087	0.201913	0	458853	7.19357e+06
394	-0.79155	0.829643	0.170357	0	458858	7.19357e+06
395	-0.693125	0.799993	0.200007	0	458863	7.19357e+06
396	-0.82006	0.837551	0.162449	0	458868	7.19357e+06
397	-0.743895	0.815746	0.184254	0	458873	7.19357e+06
398	-0.693633	0.800155	0.199845	0	458878	7.19357e+06
399	-0.566616	0.756435	0.243565	0	458883	7.19357e+06
400	-0.823138	0.838387	0.161613	0	458888	7.19357e+06
401	-0.887985	0.855199	0.144801	0	458998	7.19357e+06
402	-0.836454	0.841963	0.158037	0	459003	7.19357e+06
403	-0.142678	0.570859	0.429141	0	459008	7.19357e+06
404	-0.161261	0.579939	0.420061	0	459013	7.19357e+06
405	-0.839825	0.842858	0.157142	0	459018	7.19357e+06
406	-0.785627	0.827962	0.172038	0	459023	7.19357e+06
407	-0.241508	0.61846	0.38154	0	459028	7.19357e+06
408	-0.289753	0.640954	0.359046	0	459033	7.19357e+06
409	-0.44304	0.708081	0.291919	0	459038	7.19357e+06
410	-0.871369	0.851035	0.148965	0	459043	7.19357e+06
411	-0.158069	0.578383	0.421617	0	459048	7.19357e+06
412	-0.104254	0.551939	0.448061	0	459053	7.19357e+06
413	-0.873885	0.851671	0.148329	0	459058	7.19357e+06
414	0.109658	0.44539	0.55461	1	459063	7.19357e+06
415	-0.91316	0.861323	0.138677	0	459068	7.19357e+06
416	-0.885523	0.854588	0.145412	0	459073	7.19357e+06
417	-0.859622	0.848031	0.151969	0	459078	7.19357e+06
418	-0.825982	0.839156	0.160844	0	459083	7.19357e+06
419	-0.87755	0.852595	0.147405	0	459088	7.19357e+06
420	-1.0028	0.881383	0.118617	0	459093	7.19357e+06
421	-1.01739	0.8844	0.1156	0	459098	7.19357e+06
422	-0.953345	0.870647	0.129353	0	459113	7.19357e+06
423	-0.96887	0.874104	0.125896	0	459118	7.19357e+06
424	-0.956812	0.871426	0.128574	0	459123	7.19357e+06
425	-0.960284	0.872202	0.127798	0	459128	7.19357e+06
426	-0.909239	0.860384	0.139616	0	459133	7.19357e+06
427	-1.01736	0.884395	0.115605	0	459138	7.19357e+06
428	-0.96079	0.872314	0.127686	0	459143	7.19357e+06
429	-1.00257	0.881337	0.118663	0	459148	7.19357e+06
430	-0.891626	0.856098	0.143902	0	459153	7.19357e+06
431	-0.883462	0.854075	0.145925	0	459158	7.19357e+06
432	-0.907848	0.860049	0.139951	0	459163	7.19357e+06
433	-0.918737	0.86265	0.13735	0	459168	7.19357e+06
434	-0.929835	0.865258	0.134742	0	459173	7.19357e+06
435	-0.938699	0.867312	0.132688	0	459178	7.19357e+06
436	-0.943189	0.868342	0.131658	0	459183	7.19357e+06
437	-0.948215	0.869487	0.130513	0	459188	7.19357e+06
438	-0.948215	0.869487	0.130513	0	459193	7.19357e+06
439	-0.949074	0.869682	0.130318	0	459198	7.19357e+06
440	-0.0743439	0.537104	0.462896	0	458763	7.19356e+06
441	-0.318363	0.654013	0.345987	0	458768	7.19356e+06
442	-0.696225	0.800983	0.199017	0	458773	7.19356e+06
443	-0.951187	0.87016	0.12984	0	458778	7.19356e+06
444	-0.97312	0.875036	0.124964	0	458783	7.19356e+06
445	-0.903799	0.859071	0.140929	0	458788	7.19356e+06
446	-0.846568	0.844636	0.155364	0	458793	7.19356e+06
447	-0.934739	0.866398	0.133602	0	458798	7.19356e+06
448	-0.993756	0.87948	0.12052	0	458803	7.19356e+06
449	-0.916368	0.862087	0.137913	0	458808	7.19356e+06
450	-0.996938	0.880153	0.119847	0	458813	7.19356e+06
451	-0.316349	0.653101	0.346899	0	458818	7.19356e+06
452	-1.02281	0.885504	0.114496	0	458823	7.19356e+06
453	-0.963689	0.872959	0.127041	0	458828	7.19356e+06
454	-0.261967	0.628067	0.371933	0	458833	7.19356e+06
455	-0.888679	0.85537	0.14463	0	458838	7.19356e+06
456	-0.911307	0.860879	0.139121	0	458843	7.19356e+06
457	-0.732117	0.812179	0.187821	0	458848	7.19356e+06
458	-0.512643	0.736001	0.263999	0	458853	7.19356e+06
459	-0.591762	0.765581	0.234419	0	458858	7.19356e+06
460	-0.747122	0.816714	0.183286	0	458863	7.19356e+06
461	-0.748838	0.817228	0.182772	0	458868	7.19356e+06
462	-0.553114	0.751425	0.248575	0	458873	7.19356e+06
463	-0.400308	0.690106	0.309894	0	458878	7.19356e+06
464	-0.788937	0.828903	0.171097	0	458883	7.19356e+06
465	-0.899728	0.858083	0.141917	0	458888	7.19356e+06
466	-0.0572482	0.528593	0.471407	0	458893	7.19356e+06
467	-0.785211	0.827844	0.172156	0	458998	7.19356e+06
468	-0.977362	0.875961	0.124039	0	459003	7.19356e+06
469	-0.297843	0.644669	0.355331	0	459008	7.19356e+06
470	-0.166075	0.582282	0.417718	0	459013	7.19356e+06
471	-0.518321	0.738202	0.261798	0	459018	7.19356e+06
472	-0.488078	0.726345	0.273655	0	459023	7.19356e+06
473	0.0702216	0.464947	0.535053	1	459028	7.19356e+06
474	-0.238805	0.617183	0.382817	0	459033	7.19356e+06
475	-0.178091	0.588116	0.411884	0	459038	7.19356e+06
476	-0.942696	0.868229	0.131771	0	459043	7.19356e+06
477	-0.156817	0.577772	0.422228	0	459048	7.19356e+06
478	-0.942233	0.868123	0.131877	0	459053	7.19356e+06
479	-0.0277249	0.513859	0.486141	0	459058	7.19356e+06
480	0.106851	0.446777	0.553223	1	459063	7.19356e+06
481	-0.970259	0.874409	0.125591	0	459068	7.19356e+06
482	-0.900937	0.858377	0.141623	0	459073	7.19356e+06
483	-0.937752	0.867094	0.132906	0	459078	7.19356e+06
484	-0.870839	0.8509	0.1491	0	459083	7.19356e+06
485	-0.757713	0.819864	0.180136	0	459088	7.19356e+06
486	-0.942164	0.868107	0.131893	0	459093	7.19356e+06
487	-0.999318	0.880654	0.119346	0	459098	7.19356e+06
488	-1.01685	0.884291	0.115709	0	459103	7.19356e+06
489	-1.00161	0.881134	0.118866	0	459108	7.19356e+06
490	-0.98139	0.876833	0.123167	0	459113	7.19356e+06
491	-0.960965	0.872353	0.127647	0	459118	7.19356e+06
492	-0.958075	0.871709	0.128291	0	459123	7.19356e+06
493	-0.953013	0.870572	0.129428	0	459128	7.19356e+06
494	-0.927058	0.86461	0.13539	0	459133	7.19356e+06
495	-1.02037	0.88501	0.11499	0	459138	7.19356e+06
496	-0.962175	0.872623	0.127377	0	459143	7.19356e+06
497	-0.999702	0.880735	0.119265	0	459148	7.19356e+06
498	-0.897511	0.857542	0.142458	0	459153	7.19356e+06
499	-0.883462	0.854075	0.145925	0	459158	7.19356e+06
500	-0.855997	0.847095	0.152905	0	459163	7.19356e+06
501	-0.916039	0.862009	0.137991	0	459168	7.19356e+06
502	-0.921078	0.863203	0.136797	0	459173	7.19356e+06
503	-0.939987	0.867608	0.132392	0	459178	7.19356e+06
504	-0.939987	0.867608	0.132392	0	459183	7.19356e+06
505	-0.940317	0.867684	0.132316	0	459188	7.19356e+06
506	-0.949503	0.869779	0.130221	0	459193	7.19356e+06
507	-0.902529	0.858763	0.141237	0	459198	7.19356e+06
508	-0.345954	0.666391	0.333609	0	459203	7.19356e+06
509	-0.267532	0.630664	0.369336	0	458753	7.19356e+06
510	-0.120648	0.560033	0.439967	0	458758	7.19356e+06
511	-0.506894	0.733761	0.266239	0	458763	7.19356e+06
512	-0.806334	0.833782	0.166218	0	458768	7.19356e+06
513	-0.964642	0.87317	0.12683	0	458773	7.19356e+06
514	-0.86203	0.848651	0.151349	0	458778	7.19356e+06
515	-0.873588	0.851596	0.148404	0	458783	7.19356e+06
516	-0.985207	0.877655	0.122345	0	458788	7.19356e+06
517	-0.976945	0.87587	0.12413	0	458793	7.19356e+06
518	-0.967419	0.873784	0.126216	0	458798	7.19356e+06
519	-0.971373	0.874654	0.125346	0	458803	7.19356e+06
520	-0.971373	0.874654	0.125346	0	458808	7.19356e+06
521	-0.984659	0.877538	0.122462	0	458813	7.19356e+06
522	-0.990581	0.878805	0.121195	0	458818	7.19356e+06
523	-1.01183	0.883258	0.116742	0	458823	7.19356e+06
524	-0.960354	0.872217	0.127783	0	458828	7.19356e+06
525	-0.985362	0.877689	0.122311	0	458833	7.19356e+06
526	-1.00897	0.882668	0.117332	0	458838	7.19356e+06
527	-0.975324	0.875517	0.124483	0	458843	7.19356e+06
528	-0.863842	0.849116	0.150884	0	458848	7.19356e+06
529	-0.920312	0.863023	0.136977	0	458853	7.19356e+06
530	-0.737214	0.813729	0.186271	0	458858	7.19356e+06
531	-0.875132	0.851986	0.148014	0	458863	7.19356e+06
532	-0.680514	0.795927	0.204073	0	458868	7.19356e+06
533	-0.655813	0.787785	0.212215	0	458873	7.19356e+06
534	0.162518	0.419449	0.580551	1	458878	7.19356e+06
535	0.042865	0.478581	0.521419	1	458883	7.19356e+06
536	0.146025	0.427502	0.572498	1	458888	7.19356e+06
537	-0.832625	0.840941	0.159059	0	458893	7.19356e+06
538	-0.614594	0.773677	0.226323	0	458898	7.19356e+06
539	-0.754904	0.819033	0.180967	0	458903	7.19356e+06
540	-0.814297	0.835977	0.164023	0	458998	7.19356e+06
541	-0.182754	0.590373	0.409627	0	459003	7.19356e+06
542	-0.203133	0.600192	0.399808	0	459008	7.19356e+06
543	-0.728879	0.81119	0.18881	0	459013	7.19356e+06
544	-0.481408	0.723685	0.276315	0	459018	7.19356e+06
545	0.169734	0.415939	0.584061	1	459023	7.19356e+06
546	-0.067681	0.533789	0.466211	0	459028	7.19356e+06
547	0.0933193	0.453475	0.546525	1	459033	7.19356e+06
548	-0.370692	0.677298	0.322702	0	459038	7.19356e+06
549	-0.0592583	0.529595	0.470405	0	459043	7.19356e+06
550	-0.93529	0.866525	0.133475	0	459048	7.19356e+06
551	-0.354507	0.670183	0.329817	0	459053	7.19356e+06
552	-0.285037	0.63878	0.36122	0	459058	7.19356e+06
553	-0.0561087	0.528025	0.471975	0	459063	7.19356e+06
554	-0.271361	0.632445	0.367555	0	459068	7.19356e+06
555	-0.941199	0.867886	0.132114	0	459073	7.19356e+06
556	-0.960205	0.872184	0.127816	0	459078	7.19356e+06
557	-0.931709	0.865695	0.134305	0	459083	7.19356e+06
558	-0.883837	0.854168	0.145832	0	459088	7.19356e+06
559	-0.796649	0.83108	0.16892	0	459093	7.19356e+06
560	-0.952416	0.870438	0.129562	0	459098	7.19356e+06
561	-1.02276	0.885494	0.114506	0	459103	7.19356e+06
562	-1.00957	0.882792	0.117208	0	459108	7.19356e+06
563	-0.98139	0.876833	0.123167	0	459113	7.19356e+06
564	-0.967385	0.873776	0.126224	0	459118	7.19356e+06
565	-0.950177	0.869932	0.130068	0	459123	7.19356e+06
566	-0.947828	0.869399	0.130601	0	459128	7.19356e+06
567	-0.909935	0.860551	0.139449	0	459133	7.19356e+06
568	-1.02325	0.885593	0.114407	0	459138	7.19356e+06
569	-1.01736	0.884395	0.115605	0	459143	7.19356e+06
570	-0.99669	0.8801	0.1199	0	459148	7.19356e+06
571	-0.891452	0.856055	0.143945	0	459153	7.19356e+06
572	-0.889346	0.855535	0.144465	0	459158	7.19356e+06
573	-0.883462	0.854075	0.145925	0	459163	7.19356e+06
574	-0.913382	0.861376	0.138624	0	459168	7.19356e+06
575	-0.923951	0.863881	0.136119	0	459173	7.19356e+06
576	-0.923951	0.863881	0.136119	0	459178	7.19356e+06
577	-0.938699	0.867312	0.132688	0	459183	7.19356e+06
578	-0.948215	0.869487	0.130513	0	459188	7.19356e+06
579	-0.948215	0.869487	0.130513	0	459193	7.19356e+06
580	-0.943189	0.868342	0.131658	0	459198	7.19356e+06
581	-0.309311	0.649905	0.350095	0	459203	7.19356e+06
582	0.0168779	0.491562	0.508438	1	458748	7.19355e+06
583	-0.137383	0.568263	0.431737	0	458753	7.19355e+06
584	-0.599531	0.768358	0.231642	0	458758	7.19355e+06
585	-0.68628	0.797794	0.202206	0	458763	7.19355e+06
586	-0.987635	0.878176	0.121824	0	458768	7.19355e+06
587	-0.931528	0.865653	0.134347	0	458773	7.19355e+06
588	-0.551948	0.750989	0.249011	0	458778	7.19355e+06
589	-0.87535	0.852041	0.147959	0	458783	7.19355e+06
590	-0.975531	0.875562	0.124438	0	458788	7.19355e+06
591	-1.02843	0.886639	0.113361	0	458793	7.19355e+06
592	-1.02374	0.885693	0.114307	0	458798	7.19355e+06
593	-0.999846	0.880765	0.119235	0	458803	7.19355e+06
594	-0.742063	0.815195	0.184805	0	458808	7.19355e+06
595	-0.953717	0.870731	0.129269	0	458813	7.19355e+06
596	-1.01121	0.883131	0.116869	0	458818	7.19355e+06
597	-0.668285	0.791925	0.208075	0	458823	7.19355e+06
598	-0.671521	0.79299	0.20701	0	458828	7.19355e+06
599	-0.960551	0.872261	0.127739	0	458833	7.19355e+06
600	-1.01357	0.883616	0.116384	0	458838	7.19355e+06
601	-0.980184	0.876573	0.123427	0	458843	7.19355e+06
602	-0.98824	0.878305	0.121695	0	458848	7.19355e+06
603	-0.730845	0.811791	0.188209	0	458853	7.19355e+06
604	-0.529826	0.742624	0.257376	0	458858	7.19355e+06
605	-0.753811	0.818709	0.181291	0	458863	7.19355e+06
606	-0.612634	0.772989	0.227011	0	458868	7.19355e+06
607	-0.67339	0.793603	0.206397	0	458873	7.19355e+06
608	0.161043	0.420168	0.579832	1	458878	7.19355e+06
609	0.173586	0.414069	0.585931	1	458883	7.19355e+06
610	-0.0944813	0.547101	0.452899	0	458888	7.19355e+06
611	-0.788358	0.828739	0.171261	0	458893	7.19355e+06
612	-0.768946	0.823158	0.176842	0	458898	7.19355e+06
613	-0.794795	0.830559	0.169441	0	458903	7.19355e+06
614	-0.856866	0.84732	0.15268	0	458998	7.19355e+06
615	-0.147812	0.573372	0.426628	0	459003	7.19355e+06
616	-0.604812	0.770232	0.229768	0	459008	7.19355e+06
617	-0.679809	0.795698	0.204302	0	459013	7.19355e+06
618	-0.628126	0.77838	0.22162	0	459018	7.19355e+06
619	0.0847315	0.457735	0.542265	1	459023	7.19355e+06
620	-0.638863	0.782063	0.217937	0	459028	7.19355e+06
621	-0.414322	0.696068	0.303932	0	459033	7.19355e+06
622	-0.413354	0.695658	0.304342	0	459038	7.19355e+06
623	-0.92382	0.86385	0.13615	0	459043	7.19355e+06
624	-0.74172	0.815092	0.184908	0	459048	7.19355e+06
625	-0.777269	0.825568	0.174432	0	459053	7.19355e+06
626	-0.365504	0.675026	0.324974	0	459058	7.19355e+06
627	-0.75911	0.820276	0.179724	0	459063	7.19355e+06
628	-0.771624	0.823936	0.176064	0	459068	7.19355e+06
629	-0.945049	0.868767	0.131233	0	459073	7.19355e+06
630	-0.950869	0.870088	0.129912	0	459078	7.19355e+06
631	-0.966633	0.873611	0.126389	0	459083	7.19355e+06
632	-0.826226	0.839222	0.160778	0	459088	7.19355e+06
633	-0.767941	0.822865	0.177135	0	459093	7.19355e+06
634	-0.899262	0.857969	0.142031	0	459098	7.19355e+06
635	-1.01665	0.884249	0.115751	0	459103	7.19355e+06
636	-1.00904	0.882682	0.117318	0	459108	7.19355e+06
637	-0.982916	0.877163	0.122837	0	459113	7.19355e+06
638	-0.960897	0.872338	0.127662	0	459118	7.19355e+06
639	-0.886174	0.854749	0.145251	0	459123	7.19355e+06
640	-0.908234	0.860142	0.139858	0	459128	7.19355e+06
641	-0.935107	0.866483	0.133517	0	459133	7.19355e+06
642	-1.02325	0.885593	0.114407	0	459138	7.19355e+06
643	-1.01719	0.884359	0.115641	0	459143	7.19355e+06
644	-0.99669	0.8801	0.1199	0	459148	7.19355e+06
645	-0.942607	0.868209	0.131791	0	459153	7.19355e+06
646	-0.883462	0.854075	0.145925	0	459158	7.19355e+06
647	-0.889346	0.855535	0.144465	0	459163	7.19355e+06
648	-0.907419	0.859946	0.140054	0	459168	7.19355e+06
649	-0.923938	0.863877	0.136123	0	459173	7.19355e+06
650	-0.930264	0.865359	0.134641	0	459178	7.19355e+06
651	-0.933673	0.866151	0.133849	0	459183	7.19355e+06
652	-0.943189	0.868342	0.131658	0	459188	7.19355e+06
653	-0.949503	0.869779	0.130221	0	459193	7.19355e+06
654	-0.949503	0.869779	0.130221	0	459198	7.19355e+06
655	-0.637756	0.781685	0.218315	0	459203	7.19355e+06
656	-0.195837	0.596686	0.403314	0	458738	7.19355e+06
657	-0.16693	0.582698	0.417302	0	458743	7.19355e+06
658	-0.898155	0.857699	0.142301	0	458748	7.19355e+06
659	-0.892848	0.856399	0.143601	0	458753	7.19355e+06
660	-0.911813	0.861001	0.138999	0	458758	7.19355e+06
661	-0.906659	0.859762	0.140238	0	458763	7.19355e+06
662	-0.974458	0.875328	0.124672	0	458768	7.19355e+06
663	-0.476085	0.721552	0.278448	0	458773	7.19355e+06
664	-0.97243	0.874885	0.125115	0	458778	7.19355e+06
665	-1.00101	0.881009	0.118991	0	458783	7.19355e+06
666	-0.873412	0.851552	0.148448	0	458788	7.19355e+06
667	-0.988025	0.87826	0.12174	0	458793	7.19355e+06
668	-1.01395	0.883695	0.116305	0	458798	7.19355e+06
669	-0.980951	0.876739	0.123261	0	458803	7.19355e+06
670	-0.862335	0.848729	0.151271	0	458808	7.19355e+06
671	-0.66875	0.792079	0.207921	0	458813	7.19355e+06
672	-0.832728	0.840969	0.159031	0	458818	7.19355e+06
673	-0.859264	0.847939	0.152061	0	458823	7.19355e+06
674	-0.759294	0.820331	0.179669	0	458828	7.19355e+06
675	-0.860806	0.848336	0.151664	0	458833	7.19355e+06
676	-0.980113	0.876557	0.123443	0	458838	7.19355e+06
677	-0.942162	0.868107	0.131893	0	458843	7.19355e+06
678	-0.883737	0.854143	0.145857	0	458848	7.19355e+06
679	-0.97948	0.87642	0.12358	0	458853	7.19355e+06
680	-0.109433	0.554499	0.445501	0	458858	7.19355e+06
681	-0.636235	0.781165	0.218835	0	458863	7.19355e+06
682	-0.478616	0.722567	0.277433	0	458868	7.19355e+06
683	-0.834621	0.841475	0.158525	0	458873	7.19355e+06
684	0.156194	0.422532	0.577468	1	458878	7.19355e+06
685	0.0130333	0.493484	0.506516	1	458883	7.19355e+06
686	-0.0198784	0.509938	0.490062	0	458888	7.19355e+06
687	0.122886	0.438864	0.561136	1	458893	7.19355e+06
688	-0.741861	0.815134	0.184866	0	458898	7.19355e+06
689	-0.846089	0.84451	0.15549	0	458903	7.19355e+06
690	-0.649845	0.785783	0.214217	0	458993	7.19355e+06
691	-0.928644	0.864981	0.135019	0	458998	7.19355e+06
692	-0.45923	0.714728	0.285272	0	459003	7.19355e+06
693	-0.855643	0.847003	0.152997	0	459008	7.19355e+06
694	-0.784292	0.827582	0.172418	0	459013	7.19355e+06
695	-0.815247	0.836237	0.163763	0	459018	7.19355e+06
696	0.0178519	0.491075	0.508925	1	459023	7.19355e+06
697	0.0526318	0.473708	0.526292	1	459028	7.19355e+06
698	0.126608	0.437032	0.562968	1	459033	7.19355e+06
699	-0.800539	0.832169	0.167831	0	459038	7.19355e+06
700	-0.82997	0.84023	0.15977	0	459043	7.19355e+06
701	-0.253667	0.624181	0.375819	0	459048	7.19355e+06
702	0.00823076	0.495885	0.504115	1	459053	7.19355e+06
703	-0.377676	0.680344	0.319656	0	459058	7.19355e+06
704	-0.916822	0.862195	0.137805	0	459063	7.19355e+06
705	-0.860965	0.848377	0.151623	0	459068	7.19355e+06
706	-0.941666	0.867993	0.132007	0	459073	7.19355e+06
707	-0.97039	0.874438	0.125562	0	459078	7.19355e+06
708	-0.977287	0.875944	0.124056	0	459083	7.19355e+06
709	-0.735697	0.813269	0.186731	0	459088	7.19355e+06
710	-0.987258	0.878095	0.121905	0	459093	7.19355e+06
711	-1.0042	0.881676	0.118324	0	459098	7.19355e+06
712	-1.01665	0.884249	0.115751	0	459103	7.19355e+06
713	-1.00957	0.882792	0.117208	0	459108	7.19355e+06
714	-0.982916	0.877163	0.122837	0	459113	7.19355e+06
715	-0.960897	0.872338	0.127662	0	459118	7.19355e+06
716	-0.951028	0.870124	0.129876	0	459123	7.19355e+06
717	-0.943638	0.868445	0.131555	0	459128	7.19355e+06
718	-0.913329	0.861363	0.138637	0	459133	7.19355e+06
719	-1.04125	0.889191	0.110809	0	459138	7.19355e+06
720	-1.02325	0.885593	0.114407	0	459143	7.19355e+06
721	-0.996516	0.880063	0.119937	0	459148	7.19355e+06
722	-0.957669	0.871618	0.128382	0	459153	7.19355e+06
723	-0.883287	0.854031	0.145969	0	459158	7.19355e+06
724	-0.883287	0.854031	0.145969	0	459163	7.19355e+06
725	-0.907419	0.859946	0.140054	0	459168	7.19355e+06
726	-0.918737	0.86265	0.13735	0	459173	7.19355e+06
727	-0.923776	0.863839	0.136161	0	459178	7.19355e+06
728	-0.933673	0.866151	0.133849	0	459183	7.19355e+06
729	-0.938699	0.867312	0.132688	0	459188	7.19355e+06
730	-0.949503	0.869779	0.130221	0	459193	7.19355e+06
731	-0.902522	0.858762	0.141238	0	459198	7.19355e+06
732	-0.949074	0.869682	0.130318	0	459203	7.19355e+06
733	-0.949074	0.869682	0.130318	0	459208	7.19355e+06
734	-0.446799	0.709632	0.290368	0	458728	7.19354e+06
735	-0.0683513	0.534123	0.465877	0	458733	7.19354e+06
736	-0.557708	0.753137	0.246863	0	458738	7.19354e+06
737	-0.872166	0.851236	0.148764	0	458743	7.19354e+06
738	-0.894804	0.856879	0.143121	0	458748	7.19354e+06
739	-0.383035	0.68267	0.31733	0	458753	7.19354e+06
740	-0.908266	0.860149	0.139851	0	458758	7.19354e+06
741	-0.549164	0.749947	0.250053	0	458763	7.19354e+06
742	-0.866476	0.84979	0.15021	0	458768	7.19354e+06
743	-0.960133	0.872168	0.127832	0	458773	7.19354e+06
744	-0.718998	0.808144	0.191856	0	458778	7.19354e+06
745	-1.00803	0.882474	0.117526	0	458783	7.19354e+06
746	-0.25454	0.624591	0.375409	0	458788	7.19354e+06
747	-0.991067	0.878908	0.121092	0	458793	7.19354e+06
748	-0.923728	0.863828	0.136172	0	458798	7.19354e+06
749	-0.900625	0.858301	0.141699	0	458803	7.19354e+06
750	-0.284248	0.638416	0.361584	0	458808	7.19354e+06
751	-0.875694	0.852128	0.147872	0	458813	7.19354e+06
752	-0.91683	0.862197	0.137803	0	458818	7.19354e+06
753	-0.805754	0.833621	0.166379	0	458823	7.19354e+06
754	-0.783453	0.827342	0.172658	0	458828	7.19354e+06
755	-0.917349	0.862321	0.137679	0	458833	7.19354e+06
756	-0.669769	0.792414	0.207586	0	458838	7.19354e+06
757	-0.799534	0.831888	0.168112	0	458843	7.19354e+06
758	-0.909162	0.860365	0.139635	0	458848	7.19354e+06
759	-0.867453	0.850039	0.149961	0	458853	7.19354e+06
760	-0.88507	0.854475	0.145525	0	458858	7.19354e+06
761	-0.919925	0.862931	0.137069	0	458863	7.19354e+06
762	-0.533298	0.743949	0.256051	0	458868	7.19354e+06
763	-0.563111	0.755141	0.244859	0	458873	7.19354e+06
764	-0.301388	0.646291	0.353709	0	458878	7.19354e+06
765	-0.0777527	0.538798	0.461202	0	458883	7.19354e+06
766	-0.843386	0.843799	0.156201	0	458888	7.19354e+06
767	-0.557096	0.75291	0.24709	0	458893	7.19354e+06
768	0.00856543	0.495717	0.504283	1	458898	7.19354e+06
769	0.223161	0.390236	0.609764	1	458903	7.19354e+06
770	-0.79695	0.831164	0.168836	0	458983	7.19354e+06
771	-0.230105	0.613064	0.386936	0	458988	7.19354e+06
772	-0.821979	0.838073	0.161927	0	458993	7.19354e+06
773	-0.872693	0.85137	0.14863	0	458998	7.19354e+06
774	-0.981348	0.876825	0.123175	0	459003	7.19354e+06
775	-0.283212	0.637938	0.362062	0	459008	7.19354e+06
776	-0.490033	0.727121	0.272879	0	459013	7.19354e+06
777	-0.105258	0.552435	0.447565	0	459018	7.19354e+06
778	-0.81936	0.837361	0.162639	0	459023	7.19354e+06
779	-0.493329	0.728427	0.271573	0	459028	7.19354e+06
780	0.0934129	0.453429	0.546571	1	459033	7.19354e+06
781	-0.79054	0.829357	0.170643	0	459038	7.19354e+06
782	-0.875319	0.852033	0.147967	0	459043	7.19354e+06
783	-0.826777	0.839371	0.160629	0	459048	7.19354e+06
784	-0.818922	0.837241	0.162759	0	459053	7.19354e+06
785	-0.826325	0.839249	0.160751	0	459058	7.19354e+06
786	-0.884973	0.854451	0.145549	0	459063	7.19354e+06
787	-0.951905	0.870322	0.129678	0	459068	7.19354e+06
788	-0.934396	0.866318	0.133682	0	459073	7.19354e+06
789	-0.851666	0.845969	0.154031	0	459078	7.19354e+06
790	-0.822516	0.838219	0.161781	0	459083	7.19354e+06
791	-0.782019	0.826932	0.173068	0	459088	7.19354e+06
792	-0.889291	0.855522	0.144478	0	459093	7.19354e+06
793	-0.989575	0.87859	0.12141	0	459098	7.19354e+06
794	-1.01739	0.8844	0.1156	0	459103	7.19354e+06
795	-1.00517	0.881879	0.118121	0	459108	7.19354e+06
796	-0.98139	0.876833	0.123167	0	459113	7.19354e+06
797	-0.960897	0.872338	0.127662	0	459118	7.19354e+06
798	-0.885675	0.854625	0.145375	0	459123	7.19354e+06
799	-0.955052	0.871031	0.128969	0	459128	7.19354e+06
800	-0.884435	0.854317	0.145683	0	459133	7.19354e+06
801	-1.03685	0.888321	0.111679	0	459138	7.19354e+06
802	-1.01719	0.884359	0.115641	0	459143	7.19354e+06
803	-0.996516	0.880063	0.119937	0	459148	7.19354e+06
804	-0.951785	0.870295	0.129705	0	459153	7.19354e+06
805	-0.865795	0.849616	0.150384	0	459158	7.19354e+06
806	-0.883287	0.854031	0.145969	0	459163	7.19354e+06
807	-0.889346	0.855535	0.144465	0	459168	7.19354e+06
808	-0.907323	0.859922	0.140078	0	459173	7.19354e+06
809	-0.923776	0.863839	0.136161	0	459178	7.19354e+06
810	-0.929835	0.865258	0.134742	0	459183	7.19354e+06
811	-0.933673	0.866151	0.133849	0	459188	7.19354e+06
812	-0.943014	0.868302	0.131698	0	459193	7.19354e+06
813	-0.949503	0.869779	0.130221	0	459198	7.19354e+06
814	-0.948215	0.869487	0.130513	0	459203	7.19354e+06
815	-0.943189	0.868342	0.131658	0	459208	7.19354e+06
816	-0.229761	0.612901	0.387099	0	458723	7.19354e+06
817	-0.112824	0.556174	0.443826	0	458728	7.19354e+06
818	-0.442723	0.70795	0.29205	0	458733	7.19354e+06
819	-0.937904	0.867129	0.132871	0	458738	7.19354e+06
820	-0.39507	0.687861	0.312139	0	458743	7.19354e+06
821	-0.945183	0.868797	0.131203	0	458748	7.19354e+06
822	-0.312569	0.651386	0.348614	0	458753	7.19354e+06
823	-0.88842	0.855306	0.144694	0	458758	7.19354e+06
824	-0.946571	0.869113	0.130887	0	458763	7.19354e+06
825	-0.99474	0.879688	0.120312	0	458768	7.19354e+06
826	-0.962701	0.87274	0.12726	0	458773	7.19354e+06
827	-0.838342	0.842465	0.157535	0	458778	7.19354e+06
828	-0.966758	0.873638	0.126362	0	458783	7.19354e+06
829	-0.882713	0.853888	0.146112	0	458788	7.19354e+06
830	-0.91811	0.862501	0.137499	0	458793	7.19354e+06
831	-0.601947	0.769217	0.230783	0	458798	7.19354e+06
832	-0.0327208	0.516355	0.483645	0	458803	7.19354e+06
833	-0.981765	0.876915	0.123085	0	458808	7.19354e+06
834	-0.630011	0.77903	0.22097	0	458813	7.19354e+06
835	-0.108286	0.553932	0.446068	0	458818	7.19354e+06
836	-0.908591	0.860228	0.139772	0	458823	7.19354e+06
837	-0.894118	0.856711	0.143289	0	458828	7.19354e+06
838	-0.889466	0.855565	0.144435	0	458833	7.19354e+06
839	-0.912722	0.861218	0.138782	0	458838	7.19354e+06
840	-0.156554	0.577644	0.422356	0	458843	7.19354e+06
841	-0.928651	0.864982	0.135018	0	458848	7.19354e+06
842	-0.939863	0.86758	0.13242	0	458853	7.19354e+06
843	-0.996229	0.880003	0.119997	0	458858	7.19354e+06
844	-0.807707	0.834162	0.165838	0	458863	7.19354e+06
845	-0.571079	0.758076	0.241924	0	458868	7.19354e+06
846	-0.413246	0.695613	0.304387	0	458873	7.19354e+06
847	-0.12885	0.564071	0.435929	0	458878	7.19354e+06
848	-0.267959	0.630862	0.369138	0	458883	7.19354e+06
849	-0.898697	0.857831	0.142169	0	458888	7.19354e+06
850	-0.11783	0.558644	0.441356	0	458893	7.19354e+06
851	-0.641198	0.782857	0.217143	0	458898	7.19354e+06
852	-0.700176	0.80224	0.19776	0	458903	7.19354e+06
853	-0.881186	0.853506	0.146494	0	458908	7.19354e+06
854	-0.79695	0.831164	0.168836	0	458983	7.19354e+06
855	-0.732826	0.812396	0.187604	0	458988	7.19354e+06
856	-0.938672	0.867306	0.132694	0	458993	7.19354e+06
857	-0.222916	0.609648	0.390352	0	458998	7.19354e+06
858	-0.212877	0.60486	0.39514	0	459003	7.19354e+06
859	-0.292604	0.642265	0.357735	0	459008	7.19354e+06
860	-0.718424	0.807966	0.192034	0	459013	7.19354e+06
861	-0.929464	0.865172	0.134828	0	459018	7.19354e+06
862	-0.841659	0.843343	0.156657	0	459023	7.19354e+06
863	-0.825645	0.839065	0.160935	0	459028	7.19354e+06
864	-0.134993	0.567089	0.432911	0	459033	7.19354e+06
865	-0.657469	0.788338	0.211662	0	459038	7.19354e+06
866	-0.116915	0.558192	0.441808	0	459043	7.19354e+06
867	-0.806601	0.833855	0.166145	0	459048	7.19354e+06
868	-0.723977	0.809683	0.190317	0	459053	7.19354e+06
869	-0.828404	0.839809	0.160191	0	459058	7.19354e+06
870	-0.892919	0.856416	0.143584	0	459063	7.19354e+06
871	-0.930964	0.865522	0.134478	0	459068	7.19354e+06
872	-0.90742	0.859946	0.140054	0	459073	7.19354e+06
873	-0.676303	0.794555	0.205445	0	459078	7.19354e+06
874	-0.518568	0.738297	0.261703	0	459083	7.19354e+06
875	-0.698745	0.801785	0.198215	0	459088	7.19354e+06
876	-1.0072	0.8823	0.1177	0	459093	7.19354e+06
877	-1.01685	0.884291	0.115709	0	459098	7.19354e+06
878	-1.02095	0.885127	0.114873	0	459103	7.19354e+06
879	-1.00957	0.882792	0.117208	0	459108	7.19354e+06
880	-0.985788	0.87778	0.12222	0	459113	7.19354e+06
881	-0.974656	0.875372	0.124628	0	459118	7.19354e+06
882	-0.903885	0.859092	0.140908	0	459123	7.19354e+06
883	-0.956578	0.871373	0.128627	0	459128	7.19354e+06
884	-0.940257	0.86767	0.13233	0	459133	7.19354e+06
885	-1.03973	0.88889	0.11111	0	459138	7.19354e+06
886	-1.02325	0.885593	0.114407	0	459143	7.19354e+06
887	-1.00697	0.882254	0.117746	0	459148	7.19354e+06
888	-0.95161	0.870256	0.129744	0	459153	7.19354e+06
889	-0.864014	0.84916	0.15084	0	459158	7.19354e+06
890	-0.883287	0.854031	0.145969	0	459163	7.19354e+06
891	-0.887686	0.855124	0.144876	0	459168	7.19354e+06
892	-0.901534	0.858522	0.141478	0	459173	7.19354e+06
893	-0.921923	0.863403	0.136597	0	459178	7.19354e+06
894	-0.929835	0.865258	0.134742	0	459183	7.19354e+06
895	-0.91623	0.862054	0.137946	0	459188	7.19354e+06
896	-0.943189	0.868342	0.131658	0	459193	7.19354e+06
897	-0.943014	0.868302	0.131698	0	459198	7.19354e+06
898	-0.943014	0.868302	0.131698	0	459203	7.19354e+06
899	-0.949074	0.869682	0.130318	0	459208	7.19354e+06
900	-0.520313	0.738971	0.261029	0	458713	7.19353e+06
901	-0.761817	0.821073	0.178927	0	458718	7.19353e+06
902	-0.611797	0.772695	0.227305	0	458723	7.19353e+06
903	-0.720701	0.808672	0.191328	0	458728	7.19353e+06
904	-0.879705	0.853136	0.146864	0	458733	7.19353e+06
905	-0.314072	0.652069	0.347931	0	458738	7.19353e+06
906	-0.298321	0.644887	0.355113	0	458743	7.19353e+06
907	-1.02527	0.886001	0.113999	0	458748	7.19353e+06
908	-0.328051	0.658384	0.341616	0	458753	7.19353e+06
909	-0.408954	0.693792	0.306208	0	458758	7.19353e+06
910	-0.805564	0.833568	0.166432	0	458763	7.19353e+06
911	-0.432167	0.703565	0.296435	0	458768	7.19353e+06
912	-0.552821	0.751316	0.248684	0	458773	7.19353e+06
913	-0.428324	0.70196	0.29804	0	458778	7.19353e+06
914	-0.0167919	0.508395	0.491605	0	458783	7.19353e+06
915	-0.972803	0.874967	0.125033	0	458788	7.19353e+06
916	-0.943751	0.86847	0.13153	0	458793	7.19353e+06
917	-0.902941	0.858863	0.141137	0	458798	7.19353e+06
918	-0.49309	0.728333	0.271667	0	458803	7.19353e+06
919	-0.450018	0.710957	0.289043	0	458808	7.19353e+06
920	-0.507094	0.733839	0.266161	0	458813	7.19353e+06
921	-0.691042	0.799326	0.200674	0	458818	7.19353e+06
922	-0.240991	0.618216	0.381784	0	458823	7.19353e+06
923	-0.472498	0.720108	0.279892	0	458828	7.19353e+06
924	-0.897224	0.857472	0.142528	0	458833	7.19353e+06
925	-0.866069	0.849686	0.150314	0	458838	7.19353e+06
926	-0.0392237	0.519602	0.480398	0	458843	7.19353e+06
927	-0.877486	0.852579	0.147421	0	458848	7.19353e+06
928	-0.600675	0.768765	0.231235	0	458853	7.19353e+06
929	-0.673261	0.79356	0.20644	0	458858	7.19353e+06
930	-0.955314	0.87109	0.12891	0	458863	7.19353e+06
931	-0.271745	0.632624	0.367376	0	458868	7.19353e+06
932	-0.481313	0.723647	0.276353	0	458873	7.19353e+06
933	-0.460403	0.715206	0.284794	0	458878	7.19353e+06
934	-0.0134009	0.5067	0.4933	0	458883	7.19353e+06
935	-0.546516	0.748952	0.251048	0	458888	7.19353e+06
936	-0.203108	0.60018	0.39982	0	458893	7.19353e+06
937	0.0408503	0.479586	0.520414	1	458898	7.19353e+06
938	-0.797846	0.831415	0.168585	0	458903	7.19353e+06
939	0.244246	0.380249	0.619751	1	458908	7.19353e+06
940	-0.749574	0.817447	0.182553	0	458973	7.19353e+06
941	-0.491206	0.727587	0.272413	0	458978	7.19353e+06
942	-0.73313	0.812488	0.187512	0	458983	7.19353e+06
943	-0.910365	0.860654	0.139346	0	458988	7.19353e+06
944	-0.931979	0.865758	0.134242	0	458993	7.19353e+06
945	-0.653978	0.787171	0.212829	0	458998	7.19353e+06
946	-0.207277	0.602179	0.397821	0	459003	7.19353e+06
947	-0.755006	0.819063	0.180937	0	459008	7.19353e+06
948	-0.0111884	0.505594	0.494406	0	459013	7.19353e+06
949	0.0571863	0.471438	0.528562	1	459018	7.19353e+06
950	0.131201	0.434773	0.565227	1	459023	7.19353e+06
951	0.00611038	0.496945	0.503055	1	459028	7.19353e+06
952	-0.792349	0.829869	0.170131	0	459033	7.19353e+06
953	0.0560199	0.472019	0.527981	1	459038	7.19353e+06
954	-0.927593	0.864735	0.135265	0	459043	7.19353e+06
955	-0.607548	0.7712	0.2288	0	459048	7.19353e+06
956	-0.600461	0.768689	0.231311	0	459053	7.19353e+06
957	-0.846832	0.844705	0.155295	0	459058	7.19353e+06
958	-0.814741	0.836099	0.163901	0	459063	7.19353e+06
959	-0.0633268	0.531621	0.468379	0	459068	7.19353e+06
960	-0.0653739	0.53264	0.46736	0	459073	7.19353e+06
961	-0.284547	0.638554	0.361446	0	459078	7.19353e+06
962	-0.898504	0.857784	0.142216	0	459083	7.19353e+06
963	-0.945661	0.868906	0.131094	0	459088	7.19353e+06
964	-1.01739	0.8844	0.1156	0	459093	7.19353e+06
965	-1.01662	0.884243	0.115757	0	459098	7.19353e+06
966	-1.00464	0.881768	0.118232	0	459103	7.19353e+06
967	-1.00066	0.880936	0.119064	0	459108	7.19353e+06
968	-0.974009	0.87523	0.12477	0	459113	7.19353e+06
969	-0.978594	0.876228	0.123772	0	459118	7.19353e+06
970	-0.936268	0.866751	0.133249	0	459123	7.19353e+06
971	-0.939766	0.867557	0.132443	0	459128	7.19353e+06
972	-0.818423	0.837105	0.162895	0	459133	7.19353e+06
973	-0.957018	0.871472	0.128528	0	459138	7.19353e+06
974	-1.02663	0.886277	0.113723	0	459143	7.19353e+06
975	-0.988775	0.87842	0.12158	0	459148	7.19353e+06
976	-0.957057	0.871481	0.128519	0	459153	7.19353e+06
977	-0.949505	0.869779	0.130221	0	459158	7.19353e+06
978	-0.883287	0.854031	0.145969	0	459163	7.19353e+06
979	-0.883287	0.854031	0.145969	0	459168	7.19353e+06
980	-0.898126	0.857692	0.142308	0	459173	7.19353e+06
981	-0.924796	0.864079	0.135921	0	459178	7.19353e+06
982	-0.766437	0.822426	0.177574	0	459183	7.19353e+06
983	-0.814286	0.835974	0.164026	0	459188	7.19353e+06
984	-0.933498	0.86611	0.13389	0	459193	7.19353e+06
985	-0.95613	0.871273	0.128727	0	459198	7.19353e+06
986	-0.933722	0.866162	0.133838	0	459203	7.19353e+06
987	-0.949074	0.869682	0.130318	0	459208	7.19353e+06
988	-0.943014	0.868302	0.131698	0	459213	7.19353e+06
989	-0.449776	0.710857	0.289143	0	458703	7.19353e+06
990	-0.441629	0.707497	0.292503	0	458708	7.19353e+06
991	-0.2693	0.631487	0.368513	0	458713	7.19353e+06
992	-0.859354	0.847962	0.152038	0	458718	7.19353e+06
993	-0.899017	0.85791	0.14209	0	458723	7.19353e+06
994	-0.825089	0.838915	0.161085	0	458728	7.19353e+06
995	-0.243818	0.619549	0.380451	0	458733	7.19353e+06
996	-0.230573	0.613286	0.386714	0	458738	7.19353e+06
997	-0.171572	0.584954	0.415046	0	458743	7.19353e+06
998	-0.564021	0.755477	0.244523	0	458748	7.19353e+06
999	-0.963736	0.872969	0.127031	0	458753	7.19353e+06
1000	-0.427703	0.7017	0.2983	0	458758	7.19353e+06
1001	-0.344612	0.665794	0.334206	0	458763	7.19353e+06
1002	-0.209686	0.603333	0.396667	0	458768	7.19353e+06
1003	-0.708533	0.804878	0.195122	0	458773	7.19353e+06
1004	-0.961937	0.87257	0.12743	0	458778	7.19353e+06
1005	-0.337604	0.662668	0.337332	0	458783	7.19353e+06
1006	-0.408338	0.69353	0.30647	0	458788	7.19353e+06
1007	-0.149668	0.57428	0.42572	0	458793	7.19353e+06
1008	-0.903246	0.858937	0.141063	0	458798	7.19353e+06
1009	0.0196272	0.490188	0.509812	1	458803	7.19353e+06
1010	-0.896942	0.857403	0.142597	0	458808	7.19353e+06
1011	0.0285755	0.485716	0.514284	1	458813	7.19353e+06
1012	-0.0645854	0.532248	0.467752	0	458818	7.19353e+06
1013	-0.129644	0.564461	0.435539	0	458823	7.19353e+06
1014	-0.485557	0.725342	0.274658	0	458828	7.19353e+06
1015	-0.830626	0.840406	0.159594	0	458833	7.19353e+06
1016	-0.702704	0.803041	0.196959	0	458838	7.19353e+06
1017	-0.73805	0.813983	0.186017	0	458843	7.19353e+06
1018	-0.763434	0.821548	0.178452	0	458848	7.19353e+06
1019	-0.791542	0.829641	0.170359	0	458853	7.19353e+06
1020	-0.915989	0.861997	0.138003	0	458858	7.19353e+06
1021	-0.828516	0.839839	0.160161	0	458863	7.19353e+06
1022	-0.948045	0.869448	0.130552	0	458868	7.19353e+06
1023	-0.717443	0.807661	0.192339	0	458873	7.19353e+06
1024	-0.2416	0.618503	0.381497	0	458878	7.19353e+06
1025	-0.530115	0.742735	0.257265	0	458883	7.19353e+06
1026	-0.288297	0.640283	0.359717	0	458888	7.19353e+06
1027	0.021824	0.48909	0.51091	1	458893	7.19353e+06
1028	0.0729817	0.463574	0.536426	1	458898	7.19353e+06
1029	0.0729294	0.4636	0.5364	1	458903	7.19353e+06
1030	-0.847354	0.844842	0.155158	0	458908	7.19353e+06
1031	0.208685	0.397146	0.602854	1	458913	7.19353e+06
1032	0.293012	0.357548	0.642452	1	458918	7.19353e+06
1033	-0.53001	0.742694	0.257306	0	458933	7.19353e+06
1034	-0.730657	0.811734	0.188266	0	458938	7.19353e+06
1035	-0.853768	0.846516	0.153484	0	458943	7.19353e+06
1036	-0.846448	0.844605	0.155395	0	458948	7.19353e+06
1037	-0.818571	0.837146	0.162854	0	458953	7.19353e+06
1038	-0.789978	0.829198	0.170802	0	458963	7.19353e+06
1039	-0.838015	0.842378	0.157622	0	458973	7.19353e+06
1040	-0.894907	0.856904	0.143096	0	458978	7.19353e+06
1041	-0.272965	0.633191	0.366809	0	458983	7.19353e+06
1042	-0.101329	0.550492	0.449508	0	458988	7.19353e+06
1043	-0.91666	0.862157	0.137843	0	458993	7.19353e+06
1044	-0.214496	0.605633	0.394367	0	458998	7.19353e+06
1045	-0.291286	0.641659	0.358341	0	459003	7.19353e+06
1046	-0.00592971	0.502965	0.497035	0	459008	7.19353e+06
1047	-0.111069	0.555307	0.444693	0	459013	7.19353e+06
1048	-0.913598	0.861427	0.138573	0	459018	7.19353e+06
1049	0.0234762	0.488264	0.511736	1	459023	7.19353e+06
1050	-0.781686	0.826837	0.173163	0	459028	7.19353e+06
1051	-0.652913	0.786814	0.213186	0	459033	7.19353e+06
1052	-0.878433	0.852817	0.147183	0	459038	7.19353e+06
1053	-0.723128	0.809422	0.190578	0	459043	7.19353e+06
1054	-0.864413	0.849262	0.150738	0	459048	7.19353e+06
1055	-0.862442	0.848757	0.151243	0	459053	7.19353e+06
1056	-0.813605	0.835787	0.164213	0	459058	7.19353e+06
1057	-0.802059	0.832593	0.167407	0	459063	7.19353e+06
1058	-0.908203	0.860134	0.139866	0	459068	7.19353e+06
1059	-0.917398	0.862332	0.137668	0	459073	7.19353e+06
1060	-0.826592	0.839321	0.160679	0	459078	7.19353e+06
1061	-0.900305	0.858223	0.141777	0	459083	7.19353e+06
1062	-0.762832	0.821371	0.178629	0	459088	7.19353e+06
1063	-1.02072	0.88508	0.11492	0	459093	7.19353e+06
1064	-1.03381	0.887715	0.112285	0	459098	7.19353e+06
1065	-0.995646	0.87988	0.12012	0	459103	7.19353e+06
1066	-0.986383	0.877908	0.122092	0	459108	7.19353e+06
1067	-0.965749	0.873415	0.126585	0	459113	7.19353e+06
1068	-0.971783	0.874743	0.125257	0	459118	7.19353e+06
1069	-0.943556	0.868426	0.131574	0	459123	7.19353e+06
1070	-0.906429	0.859707	0.140293	0	459128	7.19353e+06
1071	-1.00645	0.882145	0.117855	0	459133	7.19353e+06
1072	-0.883847	0.854171	0.145829	0	459138	7.19353e+06
1073	-0.896421	0.857275	0.142725	0	459143	7.19353e+06
1074	-0.985927	0.87781	0.12219	0	459148	7.19353e+06
1075	-0.95161	0.870256	0.129744	0	459153	7.19353e+06
1076	-0.953904	0.870773	0.129227	0	459158	7.19353e+06
1077	-0.883287	0.854031	0.145969	0	459163	7.19353e+06
1078	-0.889346	0.855535	0.144465	0	459168	7.19353e+06
1079	-0.890872	0.855912	0.144088	0	459173	7.19353e+06
1080	-0.913382	0.861376	0.138624	0	459178	7.19353e+06
1081	-0.928977	0.865058	0.134942	0	459183	7.19353e+06
1082	-0.923776	0.863839	0.136161	0	459188	7.19353e+06
1083	-0.933498	0.86611	0.13389	0	459193	7.19353e+06
1084	-0.914689	0.861688	0.138312	0	459198	7.19353e+06
1085	-0.784782	0.827722	0.172278	0	459203	7.19353e+06
1086	-0.873864	0.851666	0.148334	0	459208	7.19353e+06
1087	-0.933722	0.866162	0.133838	0	459213	7.19353e+06
1088	-0.638918	0.782081	0.217919	0	458698	7.19352e+06
1089	-0.791134	0.829525	0.170475	0	458703	7.19352e+06
1090	-0.778838	0.82602	0.17398	0	458708	7.19352e+06
1091	-0.908011	0.860088	0.139912	0	458713	7.19352e+06
1092	-0.817576	0.836874	0.163126	0	458718	7.19352e+06
1093	-0.892161	0.85623	0.14377	0	458723	7.19352e+06
1094	-0.133433	0.566323	0.433677	0	458728	7.19352e+06
1095	-0.280138	0.636516	0.363484	0	458733	7.19352e+06
1096	-0.228351	0.612231	0.387769	0	458738	7.19352e+06
1097	-0.979479	0.87642	0.12358	0	458743	7.19352e+06
1098	-0.24517	0.620187	0.379813	0	458748	7.19352e+06
1099	-0.373066	0.678335	0.321665	0	458753	7.19352e+06
1100	-0.921327	0.863262	0.136738	0	458758	7.19352e+06
1101	-0.359438	0.672359	0.327641	0	458763	7.19352e+06
1102	-0.27065	0.632115	0.367885	0	458768	7.19352e+06
1103	-0.870626	0.850846	0.149154	0	458773	7.19352e+06
1104	-0.903689	0.859045	0.140955	0	458778	7.19352e+06
1105	-0.918301	0.862546	0.137454	0	458783	7.19352e+06
1106	-0.0945727	0.547146	0.452854	0	458788	7.19352e+06
1107	-0.0961464	0.547926	0.452074	0	458793	7.19352e+06
1108	-0.0124824	0.506241	0.493759	0	458798	7.19352e+06
1109	-0.283759	0.63819	0.36181	0	458803	7.19352e+06
1110	0.00900232	0.495499	0.504501	1	458808	7.19352e+06
1111	-0.663565	0.790365	0.209635	0	458813	7.19352e+06
1112	-0.460198	0.715123	0.284877	0	458818	7.19352e+06
1113	-0.209639	0.60331	0.39669	0	458823	7.19352e+06
1114	-0.834328	0.841397	0.158603	0	458828	7.19352e+06
1115	-0.863238	0.848961	0.151039	0	458833	7.19352e+06
1116	-0.555778	0.752419	0.247581	0	458838	7.19352e+06
1117	-0.189902	0.593826	0.406174	0	458843	7.19352e+06
1118	-0.336151	0.662018	0.337982	0	458848	7.19352e+06
1119	-0.718253	0.807913	0.192087	0	458853	7.19352e+06
1120	-0.593429	0.766179	0.233821	0	458858	7.19352e+06
1121	-0.716198	0.807274	0.192726	0	458863	7.19352e+06
1122	-0.586361	0.763637	0.236363	0	458868	7.19352e+06
1123	-0.789623	0.829098	0.170902	0	458873	7.19352e+06
1124	-0.802686	0.832768	0.167232	0	458878	7.19352e+06
1125	-0.261318	0.627764	0.372236	0	458883	7.19352e+06
1126	-0.197251	0.597366	0.402634	0	458888	7.19352e+06
1127	-0.0375219	0.518752	0.481248	0	458893	7.19352e+06
1128	0.0753443	0.462399	0.537601	1	458898	7.19352e+06
1129	0.0926381	0.453813	0.546187	1	458903	7.19352e+06
1130	-0.840814	0.84312	0.15688	0	458908	7.19352e+06
1131	0.157058	0.422111	0.577889	1	458913	7.19352e+06
1132	0.257563	0.373992	0.626008	1	458918	7.19352e+06
1133	-0.434685	0.704614	0.295386	0	458923	7.19352e+06
1134	0.0819421	0.45912	0.54088	1	458928	7.19352e+06
1135	-0.517015	0.737697	0.262303	0	458933	7.19352e+06
1136	0.255285	0.37506	0.62494	1	458938	7.19352e+06
1137	-0.837622	0.842274	0.157726	0	458943	7.19352e+06
1138	-0.830164	0.840282	0.159718	0	458948	7.19352e+06
1139	-0.880302	0.853285	0.146715	0	458953	7.19352e+06
1140	-0.880262	0.853275	0.146725	0	458958	7.19352e+06
1141	-0.905303	0.859435	0.140565	0	458963	7.19352e+06
1142	-0.890756	0.855883	0.144117	0	458968	7.19352e+06
1143	-0.162815	0.580696	0.419304	0	458973	7.19352e+06
1144	-0.467804	0.718212	0.281788	0	458978	7.19352e+06
1145	-0.020726	0.510362	0.489638	0	458983	7.19352e+06
1146	-0.159537	0.579099	0.420901	0	458988	7.19352e+06
1147	-0.990592	0.878807	0.121193	0	458993	7.19352e+06
1148	-0.218065	0.607337	0.392663	0	458998	7.19352e+06
1149	-0.0176629	0.508831	0.491169	0	459003	7.19352e+06
1150	-0.618866	0.775169	0.224831	0	459008	7.19352e+06
1151	0.14769	0.426687	0.573313	1	459013	7.19352e+06
1152	0.0388112	0.480604	0.519396	1	459018	7.19352e+06
1153	0.0669468	0.466577	0.533423	1	459023	7.19352e+06
1154	-0.882421	0.853815	0.146185	0	459028	7.19352e+06
1155	-0.701868	0.802776	0.197224	0	459033	7.19352e+06
1156	-0.496889	0.729833	0.270167	0	459038	7.19352e+06
1157	-0.700344	0.802293	0.197707	0	459043	7.19352e+06
1158	-0.891241	0.856003	0.143997	0	459048	7.19352e+06
1159	-0.00441145	0.502206	0.497794	0	459058	7.19352e+06
1160	-0.54354	0.747831	0.252169	0	459063	7.19352e+06
1161	-0.894169	0.856723	0.143277	0	459068	7.19352e+06
1162	-0.875009	0.851955	0.148045	0	459073	7.19352e+06
1163	-0.858331	0.847698	0.152302	0	459078	7.19352e+06
1164	-0.979194	0.876358	0.123642	0	459083	7.19352e+06
1165	-0.897947	0.857648	0.142352	0	459088	7.19352e+06
1166	-1.03168	0.88729	0.11271	0	459093	7.19352e+06
1167	-1.00576	0.882002	0.117998	0	459098	7.19352e+06
1168	-0.986407	0.877913	0.122087	0	459103	7.19352e+06
1169	-0.97989	0.876509	0.123491	0	459108	7.19352e+06
1170	-0.957857	0.87166	0.12834	0	459113	7.19352e+06
1171	-0.946474	0.869091	0.130909	0	459118	7.19352e+06
1172	-0.945807	0.868939	0.131061	0	459123	7.19352e+06
1173	-0.931601	0.86567	0.13433	0	459128	7.19352e+06
1174	-1.02341	0.885625	0.114375	0	459133	7.19352e+06
1175	-0.879289	0.853031	0.146969	0	459138	7.19352e+06
1176	-0.866877	0.849892	0.150108	0	459143	7.19352e+06
1177	-0.962068	0.872599	0.127401	0	459148	7.19352e+06
1178	-0.953904	0.870773	0.129227	0	459153	7.19352e+06
1179	-0.953904	0.870773	0.129227	0	459158	7.19352e+06
1180	-0.940502	0.867726	0.132274	0	459163	7.19352e+06
1181	-0.883287	0.854031	0.145969	0	459168	7.19352e+06
1182	-0.893745	0.856619	0.143381	0	459173	7.19352e+06
1183	-0.90136	0.85848	0.14152	0	459178	7.19352e+06
1184	-0.918737	0.86265	0.13735	0	459183	7.19352e+06
1185	-0.923776	0.863839	0.136161	0	459188	7.19352e+06
1186	-0.863842	0.849116	0.150884	0	459193	7.19352e+06
1187	-0.949074	0.869682	0.130318	0	459198	7.19352e+06
1188	-0.933722	0.866162	0.133838	0	459203	7.19352e+06
1189	-0.887565	0.855094	0.144906	0	459208	7.19352e+06
1190	-0.949074	0.869682	0.130318	0	459213	7.19352e+06
1191	-0.929702	0.865227	0.134773	0	459218	7.19352e+06
1192	-0.697277	0.801318	0.198682	0	458688	7.19352e+06
1193	-0.5923	0.765774	0.234226	0	458693	7.19352e+06
1194	-0.910932	0.86079	0.13921	0	458698	7.19352e+06
1195	-0.92087	0.863154	0.136846	0	458703	7.19352e+06
1196	-0.96011	0.872163	0.127837	0	458708	7.19352e+06
1197	-0.850563	0.845682	0.154318	0	458713	7.19352e+06
1198	-0.672815	0.793414	0.206586	0	458718	7.19352e+06
1199	-0.521351	0.739371	0.260629	0	458723	7.19352e+06
1200	-0.526664	0.741414	0.258586	0	458728	7.19352e+06
1201	-0.989149	0.8785	0.1215	0	458733	7.19352e+06
1202	-1.01279	0.883457	0.116543	0	458738	7.19352e+06
1203	-0.44169	0.707522	0.292478	0	458743	7.19352e+06
1204	-0.304405	0.647669	0.352331	0	458748	7.19352e+06
1205	-0.445752	0.7092	0.2908	0	458753	7.19352e+06
1206	-0.943163	0.868336	0.131664	0	458758	7.19352e+06
1207	-0.63974	0.782361	0.217639	0	458763	7.19352e+06
1208	-0.628232	0.778417	0.221583	0	458768	7.19352e+06
1209	-0.26008	0.627185	0.372815	0	458773	7.19352e+06
1210	-0.0294455	0.514718	0.485282	0	458778	7.19352e+06
1211	0.00392197	0.498039	0.501961	1	458783	7.19352e+06
1212	-0.769475	0.823312	0.176688	0	458788	7.19352e+06
1213	-0.721901	0.809043	0.190957	0	458793	7.19352e+06
1214	-0.827221	0.839491	0.160509	0	458798	7.19352e+06
1215	-0.945173	0.868795	0.131205	0	458803	7.19352e+06
1216	-0.144177	0.571593	0.428407	0	458808	7.19352e+06
1217	-0.326638	0.657748	0.342252	0	458813	7.19352e+06
1218	-0.82909	0.839994	0.160006	0	458818	7.19352e+06
1219	-0.888666	0.855367	0.144633	0	458823	7.19352e+06
1220	-0.243881	0.619579	0.380421	0	458828	7.19352e+06
1221	-0.599169	0.768229	0.231771	0	458833	7.19352e+06
1222	-0.933435	0.866096	0.133904	0	458838	7.19352e+06
1223	-0.874988	0.85195	0.14805	0	458843	7.19352e+06
1224	-0.734792	0.812994	0.187006	0	458848	7.19352e+06
1225	-0.590593	0.765161	0.234839	0	458853	7.19352e+06
1226	-0.805438	0.833533	0.166467	0	458858	7.19352e+06
1227	-0.81501	0.836172	0.163828	0	458863	7.19352e+06
1228	-0.795366	0.830719	0.169281	0	458868	7.19352e+06
1229	-0.772942	0.824319	0.175681	0	458873	7.19352e+06
1230	-0.740138	0.814614	0.185386	0	458878	7.19352e+06
1231	-0.779524	0.826217	0.173783	0	458883	7.19352e+06
1232	-0.97546	0.875547	0.124453	0	458888	7.19352e+06
1233	-0.841615	0.843332	0.156668	0	458893	7.19352e+06
1234	-0.965676	0.873399	0.126601	0	458898	7.19352e+06
1235	0.0386568	0.480681	0.519319	1	458903	7.19352e+06
1236	-0.793822	0.830284	0.169716	0	458908	7.19352e+06
1237	-0.91714	0.862271	0.137729	0	458913	7.19352e+06
1238	-0.757943	0.819932	0.180068	0	458918	7.19352e+06
1239	-0.724454	0.80983	0.19017	0	458923	7.19352e+06
1240	0.184387	0.408838	0.591162	1	458928	7.19352e+06
1241	-0.526169	0.741224	0.258776	0	458933	7.19352e+06
1242	0.085472	0.457368	0.542632	1	458938	7.19352e+06
1243	-0.906876	0.859815	0.140185	0	458943	7.19352e+06
1244	-0.730733	0.811757	0.188243	0	458948	7.19352e+06
1245	-0.881937	0.853694	0.146306	0	458953	7.19352e+06
1246	-0.855034	0.846845	0.153155	0	458958	7.19352e+06
1247	-0.85544	0.84695	0.15305	0	458963	7.19352e+06
1248	-0.030371	0.515181	0.484819	0	458968	7.19352e+06
1249	-0.722186	0.809131	0.190869	0	458973	7.19352e+06
1250	0.0607174	0.469679	0.530321	1	458978	7.19352e+06
1251	0.0153644	0.492318	0.507682	1	458983	7.19352e+06
1252	-0.399704	0.689848	0.310152	0	458988	7.19352e+06
1253	-0.99362	0.879451	0.120549	0	458993	7.19352e+06
1254	-0.773102	0.824365	0.175635	0	458998	7.19352e+06
1255	-0.862068	0.848661	0.151339	0	459003	7.19352e+06
1256	-0.854058	0.846592	0.153408	0	459008	7.19352e+06
1257	-0.831031	0.840515	0.159485	0	459013	7.19352e+06
1258	-0.88719	0.855002	0.144998	0	459018	7.19352e+06
1259	-0.828297	0.83978	0.16022	0	459023	7.19352e+06
1260	-0.757123	0.81969	0.18031	0	459028	7.19352e+06
1261	-0.85713	0.847388	0.152612	0	459033	7.19352e+06
1262	-0.369885	0.676945	0.323055	0	459038	7.19352e+06
1263	-0.844175	0.844007	0.155993	0	459043	7.19352e+06
1264	-0.894584	0.856825	0.143175	0	459048	7.19352e+06
1265	-0.0524027	0.526177	0.473823	0	459053	7.19352e+06
1266	-0.970645	0.874494	0.125506	0	459058	7.19352e+06
1267	-0.787954	0.828624	0.171376	0	459063	7.19352e+06
1268	-1.01411	0.883729	0.116271	0	459068	7.19352e+06
1269	-0.994436	0.879624	0.120376	0	459073	7.19352e+06
1270	-1.02907	0.886767	0.113233	0	459078	7.19352e+06
1271	-1.03346	0.887647	0.112353	0	459083	7.19352e+06
1272	-1.02907	0.886767	0.113233	0	459088	7.19352e+06
1273	-1.03979	0.888902	0.111098	0	459093	7.19352e+06
1274	-1.01079	0.883044	0.116956	0	459098	7.19352e+06
1275	-0.991459	0.878992	0.121008	0	459103	7.19352e+06
1276	-0.975617	0.875581	0.124419	0	459108	7.19352e+06
1277	-0.969929	0.874336	0.125664	0	459113	7.19352e+06
1278	-0.95636	0.871324	0.128676	0	459118	7.19352e+06
1279	-0.944274	0.86859	0.13141	0	459123	7.19352e+06
1280	-0.92419	0.863937	0.136063	0	459128	7.19352e+06
1281	-1.02576	0.886102	0.113898	0	459133	7.19352e+06
1282	-1.04413	0.889756	0.110244	0	459138	7.19352e+06
1283	-1.02976	0.886905	0.113095	0	459143	7.19352e+06
1284	-0.974459	0.875329	0.124671	0	459148	7.19352e+06
1285	-0.953904	0.870773	0.129227	0	459153	7.19352e+06
1286	-0.953904	0.870773	0.129227	0	459158	7.19352e+06
1287	-0.953904	0.870773	0.129227	0	459163	7.19352e+06
1288	-0.893745	0.856619	0.143381	0	459168	7.19352e+06
1289	-0.878779	0.852904	0.147096	0	459173	7.19352e+06
1290	-0.892566	0.856329	0.143671	0	459178	7.19352e+06
1291	-0.925225	0.86418	0.13582	0	459183	7.19352e+06
1292	-0.922363	0.863507	0.136493	0	459188	7.19352e+06
1293	-0.933498	0.86611	0.13389	0	459193	7.19352e+06
1294	-0.932176	0.865803	0.134197	0	459198	7.19352e+06
1295	-0.943014	0.868302	0.131698	0	459203	7.19352e+06
1296	-0.943189	0.868342	0.131658	0	459208	7.19352e+06
1297	-0.943189	0.868342	0.131658	0	459213	7.19352e+06
1298	-0.761343	0.820934	0.179066	0	459218	7.19352e+06
1299	-0.964313	0.873097	0.126903	0	458678	7.19351e+06
1300	-1.0155	0.884013	0.115987	0	458683	7.19351e+06
1301	-0.996584	0.880078	0.119922	0	458688	7.19351e+06
1302	-0.977953	0.876089	0.123911	0	458693	7.19351e+06
1303	-0.904984	0.859358	0.140642	0	458698	7.19351e+06
1304	-0.967731	0.873853	0.126147	0	458703	7.19351e+06
1305	-0.927644	0.864747	0.135253	0	458708	7.19351e+06
1306	-0.775915	0.825178	0.174822	0	458713	7.19351e+06
1307	-0.303444	0.647231	0.352769	0	458718	7.19351e+06
1308	-0.0928764	0.546305	0.453695	0	458723	7.19351e+06
1309	-0.994037	0.879539	0.120461	0	458728	7.19351e+06
1310	-0.961462	0.872464	0.127536	0	458733	7.19351e+06
1311	-0.774331	0.82472	0.17528	0	458738	7.19351e+06
1312	-0.465603	0.71732	0.28268	0	458743	7.19351e+06
1313	-0.952934	0.870554	0.129446	0	458748	7.19351e+06
1314	-0.591855	0.765614	0.234386	0	458753	7.19351e+06
1315	-0.801875	0.832542	0.167458	0	458758	7.19351e+06
1316	-0.471331	0.719637	0.280363	0	458763	7.19351e+06
1317	-0.926302	0.864433	0.135567	0	458768	7.19351e+06
1318	-0.0709999	0.53544	0.46456	0	458773	7.19351e+06
1319	-0.756182	0.819411	0.180589	0	458778	7.19351e+06
1320	0.0557071	0.472175	0.527825	1	458783	7.19351e+06
1321	-0.119886	0.559657	0.440343	0	458788	7.19351e+06
1322	-0.0380577	0.51902	0.48098	0	458793	7.19351e+06
1323	0.110012	0.445215	0.554785	1	458798	7.19351e+06
1324	-0.569799	0.757606	0.242394	0	458803	7.19351e+06
1325	-0.227153	0.611663	0.388337	0	458808	7.19351e+06
1326	-0.303955	0.647464	0.352536	0	458813	7.19351e+06
1327	-0.206939	0.602017	0.397983	0	458818	7.19351e+06
1328	-0.440155	0.706886	0.293114	0	458823	7.19351e+06
1329	-0.59562	0.766963	0.233037	0	458828	7.19351e+06
1330	-0.479975	0.723112	0.276888	0	458833	7.19351e+06
1331	-0.953397	0.870659	0.129341	0	458838	7.19351e+06
1332	-0.0834657	0.541636	0.458364	0	458843	7.19351e+06
1333	-0.664	0.79051	0.20949	0	458848	7.19351e+06
1334	-0.416306	0.696907	0.303093	0	458853	7.19351e+06
1335	-0.383318	0.682793	0.317207	0	458858	7.19351e+06
1336	-0.385101	0.683565	0.316435	0	458863	7.19351e+06
1337	-0.570143	0.757732	0.242268	0	458868	7.19351e+06
1338	-0.653033	0.786854	0.213146	0	458873	7.19351e+06
1339	-0.744211	0.815841	0.184159	0	458878	7.19351e+06
1340	-0.647187	0.784887	0.215113	0	458883	7.19351e+06
1341	-0.291862	0.641924	0.358076	0	458888	7.19351e+06
1342	-0.304288	0.647616	0.352384	0	458893	7.19351e+06
1343	-0.856187	0.847144	0.152856	0	458898	7.19351e+06
1344	-0.98371	0.877334	0.122666	0	458903	7.19351e+06
1345	-0.430039	0.702677	0.297323	0	458908	7.19351e+06
1346	-0.774796	0.824855	0.175145	0	458913	7.19351e+06
1347	-0.889894	0.855671	0.144329	0	458918	7.19351e+06
1348	-0.389952	0.685659	0.314341	0	458923	7.19351e+06
1349	-0.645381	0.784276	0.215724	0	458928	7.19351e+06
1350	-0.150241	0.57456	0.42544	0	458933	7.19351e+06
1351	-0.210648	0.603793	0.396207	0	458938	7.19351e+06
1352	0.0946339	0.452824	0.547176	1	458943	7.19351e+06
1353	0.0307409	0.484634	0.515366	1	458948	7.19351e+06
1354	-0.894914	0.856906	0.143094	0	458953	7.19351e+06
1355	-0.832236	0.840837	0.159163	0	458958	7.19351e+06
1356	-0.708877	0.804986	0.195014	0	458963	7.19351e+06
1357	0.0831569	0.458517	0.541483	1	458968	7.19351e+06
1358	-0.70598	0.804075	0.195925	0	458973	7.19351e+06
1359	0.0981385	0.451088	0.548912	1	458978	7.19351e+06
1360	-0.275044	0.634156	0.365844	0	458983	7.19351e+06
1361	-0.978134	0.876129	0.123871	0	458988	7.19351e+06
1362	-0.983695	0.87733	0.12267	0	458993	7.19351e+06
1363	-0.852617	0.846217	0.153783	0	458998	7.19351e+06
1364	0.0346738	0.48267	0.51733	1	459003	7.19351e+06
1365	0.0200211	0.489991	0.510009	1	459008	7.19351e+06
1366	-0.114941	0.557219	0.442781	0	459013	7.19351e+06
1367	-0.165015	0.581766	0.418234	0	459018	7.19351e+06
1368	0.117161	0.441686	0.558314	1	459023	7.19351e+06
1369	0.199347	0.401626	0.598374	1	459028	7.19351e+06
1370	-0.364654	0.674653	0.325347	0	459033	7.19351e+06
1371	-0.380566	0.681599	0.318401	0	459038	7.19351e+06
1372	-0.0194731	0.509735	0.490265	0	459043	7.19351e+06
1373	-0.873092	0.851471	0.148529	0	459048	7.19351e+06
1374	-0.882116	0.853739	0.146261	0	459053	7.19351e+06
1375	-0.998409	0.880463	0.119537	0	459058	7.19351e+06
1376	-0.981044	0.876759	0.123241	0	459063	7.19351e+06
1377	-1.00276	0.881375	0.118625	0	459068	7.19351e+06
1378	-0.602198	0.769306	0.230694	0	459073	7.19351e+06
1379	-0.994496	0.879636	0.120364	0	459078	7.19351e+06
1380	-0.927973	0.864824	0.135176	0	459083	7.19351e+06
1381	-1.03079	0.887112	0.112888	0	459088	7.19351e+06
1382	-1.03546	0.888044	0.111956	0	459093	7.19351e+06
1383	-0.996506	0.880061	0.119939	0	459098	7.19351e+06
1384	-0.97849	0.876206	0.123794	0	459103	7.19351e+06
1385	-0.975617	0.875581	0.124419	0	459108	7.19351e+06
1386	-0.961128	0.87239	0.12761	0	459113	7.19351e+06
1387	-0.938602	0.86729	0.13271	0	459118	7.19351e+06
1388	-0.930075	0.865314	0.134686	0	459123	7.19351e+06
1389	-0.996162	0.879989	0.120011	0	459128	7.19351e+06
1390	-1.02306	0.885556	0.114444	0	459133	7.19351e+06
1391	-1.03097	0.887148	0.112852	0	459138	7.19351e+06
1392	-1.01618	0.884153	0.115847	0	459143	7.19351e+06
1393	-0.961895	0.872561	0.127439	0	459148	7.19351e+06
1394	-0.947845	0.869403	0.130597	0	459153	7.19351e+06
1395	-0.953904	0.870773	0.129227	0	459158	7.19351e+06
1396	-0.861145	0.848424	0.151576	0	459163	7.19351e+06
1397	-0.887686	0.855124	0.144876	0	459168	7.19351e+06
1398	-0.884838	0.854417	0.145583	0	459173	7.19351e+06
1399	-0.890872	0.855912	0.144088	0	459178	7.19351e+06
1400	-0.899942	0.858135	0.141865	0	459183	7.19351e+06
1401	-0.923776	0.863839	0.136161	0	459188	7.19351e+06
1402	-0.938574	0.867283	0.132717	0	459193	7.19351e+06
1403	-0.828271	0.839773	0.160227	0	459198	7.19351e+06
1404	-0.943014	0.868302	0.131698	0	459203	7.19351e+06
1405	-0.943014	0.868302	0.131698	0	459208	7.19351e+06
1406	-0.943014	0.868302	0.131698	0	459213	7.19351e+06
1407	-0.937174	0.866961	0.133039	0	459218	7.19351e+06
1408	-1.01268	0.883433	0.116567	0	458683	7.19351e+06
1409	-1.00975	0.88283	0.11717	0	458688	7.19351e+06
1410	-0.993178	0.879357	0.120643	0	458693	7.19351e+06
1411	-0.927498	0.864713	0.135287	0	458698	7.19351e+06
1412	-0.825301	0.838972	0.161028	0	458703	7.19351e+06
1413	-0.937045	0.866931	0.133069	0	458708	7.19351e+06
1414	-0.848242	0.845075	0.154925	0	458713	7.19351e+06
1415	-0.299198	0.645289	0.354711	0	458718	7.19351e+06
1416	-0.721975	0.809066	0.190934	0	458723	7.19351e+06
1417	-0.980336	0.876606	0.123394	0	458728	7.19351e+06
1418	-0.786413	0.828186	0.171814	0	458733	7.19351e+06
1419	-0.764211	0.821775	0.178225	0	458738	7.19351e+06
1420	-0.759959	0.820526	0.179474	0	458743	7.19351e+06
1421	-0.454172	0.712661	0.287339	0	458748	7.19351e+06
1422	-0.657985	0.78851	0.21149	0	458753	7.19351e+06
1423	-0.984417	0.877486	0.122514	0	458758	7.19351e+06
1424	-0.701905	0.802788	0.197212	0	458763	7.19351e+06
1425	-0.971991	0.874789	0.125211	0	458768	7.19351e+06
1426	-0.882189	0.853757	0.146243	0	458773	7.19351e+06
1427	-0.882901	0.853935	0.146065	0	458778	7.19351e+06
1428	-0.699881	0.802146	0.197854	0	458783	7.19351e+06
1429	-0.808267	0.834316	0.165684	0	458788	7.19351e+06
1430	-0.476509	0.721722	0.278278	0	458793	7.19351e+06
1431	-0.0393826	0.519681	0.480319	0	458798	7.19351e+06
1432	-0.794009	0.830337	0.169663	0	458803	7.19351e+06
1433	-0.860743	0.84832	0.15168	0	458808	7.19351e+06
1434	-0.4042	0.691768	0.308232	0	458813	7.19351e+06
1435	-0.365946	0.67522	0.32478	0	458818	7.19351e+06
1436	-0.913291	0.861354	0.138646	0	458823	7.19351e+06
1437	-0.348759	0.667637	0.332363	0	458828	7.19351e+06
1438	-0.4715	0.719705	0.280295	0	458833	7.19351e+06
1439	-0.754055	0.818781	0.181219	0	458838	7.19351e+06
1440	-0.781299	0.826726	0.173274	0	458843	7.19351e+06
1441	-0.612023	0.772775	0.227225	0	458848	7.19351e+06
1442	-0.500856	0.731395	0.268605	0	458853	7.19351e+06
1443	-0.4966	0.72972	0.27028	0	458858	7.19351e+06
1444	-0.692212	0.799701	0.200299	0	458863	7.19351e+06
1445	-0.337092	0.662439	0.337561	0	458868	7.19351e+06
1446	-0.896112	0.8572	0.1428	0	458873	7.19351e+06
1447	-0.639983	0.782444	0.217556	0	458878	7.19351e+06
1448	-0.439652	0.706678	0.293322	0	458883	7.19351e+06
1449	-0.443659	0.708337	0.291663	0	458888	7.19351e+06
1450	-0.576192	0.759946	0.240054	0	458893	7.19351e+06
1451	-0.985128	0.877639	0.122361	0	458898	7.19351e+06
1452	-0.472226	0.719998	0.280002	0	458903	7.19351e+06
1453	-0.178258	0.588197	0.411803	0	458908	7.19351e+06
1454	-0.986463	0.877925	0.122075	0	458913	7.19351e+06
1455	-0.931282	0.865596	0.134404	0	458918	7.19351e+06
1456	-0.147422	0.573182	0.426818	0	458923	7.19351e+06
1457	-0.169444	0.58392	0.41608	0	458928	7.19351e+06
1458	-0.744497	0.815927	0.184073	0	458933	7.19351e+06
1459	-0.819422	0.837377	0.162623	0	458938	7.19351e+06
1460	-0.410796	0.694574	0.305426	0	458943	7.19351e+06
1461	-0.0179901	0.508994	0.491006	0	458948	7.19351e+06
1462	-0.3814	0.681961	0.318039	0	458953	7.19351e+06
1463	-0.781009	0.826643	0.173357	0	458958	7.19351e+06
1464	-0.739085	0.814296	0.185704	0	458963	7.19351e+06
1465	-0.0221513	0.511074	0.488926	0	458968	7.19351e+06
1466	-0.826137	0.839198	0.160802	0	458973	7.19351e+06
1467	-0.443193	0.708144	0.291856	0	458978	7.19351e+06
1468	-1.00133	0.881075	0.118925	0	458983	7.19351e+06
1469	-0.854375	0.846674	0.153326	0	458988	7.19351e+06
1470	-0.191937	0.594807	0.405193	0	458993	7.19351e+06
1471	-0.810297	0.834877	0.165123	0	458998	7.19351e+06
1472	0.155493	0.422874	0.577126	1	459003	7.19351e+06
1473	-0.188269	0.593038	0.406962	0	459008	7.19351e+06
1474	-0.0742927	0.537078	0.462922	0	459013	7.19351e+06
1475	0.100494	0.449922	0.550078	1	459018	7.19351e+06
1476	0.0527481	0.47365	0.52635	1	459023	7.19351e+06
1477	0.109	0.445715	0.554285	1	459028	7.19351e+06
1478	0.0703299	0.464893	0.535107	1	459033	7.19351e+06
1479	-0.795593	0.830783	0.169217	0	459038	7.19351e+06
1480	-0.0276628	0.513828	0.486172	0	459043	7.19351e+06
1481	-0.744129	0.815817	0.184183	0	459048	7.19351e+06
1482	-0.975535	0.875563	0.124437	0	459053	7.19351e+06
1483	-0.927788	0.86478	0.13522	0	459058	7.19351e+06
1484	-1.03869	0.888686	0.111314	0	459063	7.19351e+06
1485	-0.34776	0.667194	0.332806	0	459068	7.19351e+06
1486	-0.73867	0.814171	0.185829	0	459073	7.19351e+06
1487	-0.995801	0.879913	0.120087	0	459078	7.19351e+06
1488	-0.364441	0.67456	0.32544	0	459083	7.19351e+06
1489	-1.00247	0.881314	0.118686	0	459088	7.19351e+06
1490	-1.02883	0.886719	0.113281	0	459093	7.19351e+06
1491	-0.983686	0.877329	0.122671	0	459098	7.19351e+06
1492	-0.977123	0.875909	0.124091	0	459103	7.19351e+06
1493	-0.963118	0.872832	0.127168	0	459108	7.19351e+06
1494	-0.935956	0.866679	0.133321	0	459113	7.19351e+06
1495	-0.933862	0.866195	0.133805	0	459118	7.19351e+06
1496	-0.93504	0.866467	0.133533	0	459123	7.19351e+06
1497	-1.02306	0.885556	0.114444	0	459128	7.19351e+06
1498	-1.01756	0.884436	0.115564	0	459133	7.19351e+06
1499	-0.954103	0.870818	0.129182	0	459138	7.19351e+06
1500	-0.984926	0.877595	0.122405	0	459143	7.19351e+06
1501	-0.961895	0.872561	0.127439	0	459148	7.19351e+06
1502	-0.949505	0.869779	0.130221	0	459153	7.19351e+06
1503	-0.953904	0.870773	0.129227	0	459158	7.19351e+06
1504	-0.930885	0.865503	0.134497	0	459163	7.19351e+06
1505	-0.881216	0.853514	0.146486	0	459168	7.19351e+06
1506	-0.890872	0.855912	0.144088	0	459173	7.19351e+06
1507	-0.893745	0.856619	0.143381	0	459178	7.19351e+06
1508	-0.900037	0.858158	0.141842	0	459183	7.19351e+06
1509	-0.922363	0.863507	0.136493	0	459188	7.19351e+06
1510	-0.923776	0.863839	0.136161	0	459193	7.19351e+06
1511	-0.933498	0.86611	0.13389	0	459198	7.19351e+06
1512	-0.943014	0.868302	0.131698	0	459203	7.19351e+06
1513	-0.935633	0.866605	0.133395	0	459208	7.19351e+06
1514	-0.944063	0.868542	0.131458	0	459213	7.19351e+06
1515	-0.931115	0.865557	0.134443	0	459218	7.19351e+06
1516	-0.938496	0.867265	0.132735	0	459223	7.19351e+06
1517	-0.554856	0.752076	0.247924	0	458718	7.1935e+06
1518	-0.292446	0.642192	0.357808	0	458723	7.1935e+06
1519	-0.80949	0.834654	0.165346	0	458728	7.1935e+06
1520	-0.490143	0.727165	0.272835	0	458733	7.1935e+06
1521	-1.02338	0.88562	0.11438	0	458738	7.1935e+06
1522	-0.462888	0.716217	0.283783	0	458743	7.1935e+06
1523	-0.989626	0.878601	0.121399	0	458748	7.1935e+06
1524	-0.530147	0.742747	0.257253	0	458753	7.1935e+06
1525	-0.963752	0.872973	0.127027	0	458758	7.1935e+06
1526	-0.984999	0.877611	0.122389	0	458763	7.1935e+06
1527	-0.418295	0.697746	0.302254	0	458768	7.1935e+06
1528	-0.334708	0.661373	0.338627	0	458773	7.1935e+06
1529	-0.884586	0.854355	0.145645	0	458778	7.1935e+06
1530	-0.586855	0.763815	0.236185	0	458783	7.1935e+06
1531	-0.732548	0.812311	0.187689	0	458788	7.1935e+06
1532	-0.050703	0.52533	0.47467	0	458793	7.1935e+06
1533	0.0395203	0.48025	0.51975	1	458798	7.1935e+06
1534	-0.604419	0.770093	0.229907	0	458803	7.1935e+06
1535	-0.565696	0.756096	0.243904	0	458808	7.1935e+06
1536	-0.0568851	0.528412	0.471588	0	458813	7.1935e+06
1537	-0.601911	0.769204	0.230796	0	458818	7.1935e+06
1538	-0.574492	0.759325	0.240675	0	458823	7.1935e+06
1539	-0.713873	0.80655	0.19345	0	458828	7.1935e+06
1540	-0.906919	0.859825	0.140175	0	458833	7.1935e+06
1541	-0.886568	0.854847	0.145153	0	458838	7.1935e+06
1542	-0.732644	0.81234	0.18766	0	458843	7.1935e+06
1543	-0.743883	0.815743	0.184257	0	458848	7.1935e+06
1544	-0.758378	0.82006	0.17994	0	458853	7.1935e+06
1545	-0.567979	0.756937	0.243063	0	458858	7.1935e+06
1546	-0.604108	0.769983	0.230017	0	458863	7.1935e+06
1547	-0.662416	0.789985	0.210015	0	458868	7.1935e+06
1548	-0.198727	0.598076	0.401924	0	458873	7.1935e+06
1549	-0.188556	0.593176	0.406824	0	458878	7.1935e+06
1550	-0.552298	0.75112	0.24888	0	458883	7.1935e+06
1551	-0.505199	0.733098	0.266902	0	458888	7.1935e+06
1552	-0.176038	0.587121	0.412879	0	458893	7.1935e+06
1553	-0.012538	0.506269	0.493731	0	458898	7.1935e+06
1554	-0.257002	0.625745	0.374255	0	458903	7.1935e+06
1555	-0.723218	0.809449	0.190551	0	458908	7.1935e+06
1556	-0.789358	0.829023	0.170977	0	458913	7.1935e+06
1557	-0.584472	0.762954	0.237046	0	458918	7.1935e+06
1558	-0.752602	0.818349	0.181651	0	458923	7.1935e+06
1559	-0.958306	0.87176	0.12824	0	458928	7.1935e+06
1560	-0.950518	0.870009	0.129991	0	458933	7.1935e+06
1561	-0.507412	0.733963	0.266037	0	458938	7.1935e+06
1562	-0.648195	0.785227	0.214773	0	458943	7.1935e+06
1563	-0.21374	0.605272	0.394728	0	458948	7.1935e+06
1564	-0.0227649	0.51138	0.48862	0	458953	7.1935e+06
1565	-0.00499735	0.502499	0.497501	0	458958	7.1935e+06
1566	0.0561511	0.471954	0.528046	1	458963	7.1935e+06
1567	-0.551187	0.750705	0.249295	0	458968	7.1935e+06
1568	-0.811398	0.83518	0.16482	0	458973	7.1935e+06
1569	-0.994053	0.879543	0.120457	0	458978	7.1935e+06
1570	-0.439298	0.706531	0.293469	0	458983	7.1935e+06
1571	-0.905614	0.85951	0.14049	0	458988	7.1935e+06
1572	-0.863412	0.849006	0.150994	0	458993	7.1935e+06
1573	-0.831778	0.840715	0.159285	0	458998	7.1935e+06
1574	-0.781556	0.8268	0.1732	0	459003	7.1935e+06
1575	-0.734845	0.81301	0.18699	0	459008	7.1935e+06
1576	-0.745657	0.816276	0.183724	0	459013	7.1935e+06
1577	0.052995	0.473527	0.526473	1	459018	7.1935e+06
1578	0.163262	0.419086	0.580914	1	459023	7.1935e+06
1579	-0.446486	0.709503	0.290497	0	459028	7.1935e+06
1580	-0.827151	0.839472	0.160528	0	459033	7.1935e+06
1581	-0.923542	0.863784	0.136216	0	459038	7.1935e+06
1582	-0.940465	0.867718	0.132282	0	459043	7.1935e+06
1583	-0.676199	0.794521	0.205479	0	459048	7.1935e+06
1584	-0.966616	0.873607	0.126393	0	459053	7.1935e+06
1585	-0.480081	0.723154	0.276846	0	459058	7.1935e+06
1586	-0.605467	0.770464	0.229536	0	459063	7.1935e+06
1587	-0.613825	0.773407	0.226593	0	459068	7.1935e+06
1588	-0.70796	0.804698	0.195302	0	459073	7.1935e+06
1589	-0.447228	0.709809	0.290191	0	459078	7.1935e+06
1590	-0.908726	0.86026	0.13974	0	459083	7.1935e+06
1591	-1.0342	0.887794	0.112206	0	459088	7.1935e+06
1592	-1.02853	0.886659	0.113341	0	459093	7.1935e+06
1593	-0.95985	0.872105	0.127895	0	459098	7.1935e+06
1594	-0.985327	0.877681	0.122319	0	459103	7.1935e+06
1595	-0.967385	0.873776	0.126224	0	459108	7.1935e+06
1596	-0.95017	0.86993	0.13007	0	459113	7.1935e+06
1597	-0.941262	0.867901	0.132099	0	459118	7.1935e+06
1598	-0.997021	0.88017	0.11983	0	459123	7.1935e+06
1599	-1.02895	0.886743	0.113257	0	459128	7.1935e+06
1600	-1.02044	0.885022	0.114978	0	459133	7.1935e+06
1601	-1.01115	0.883118	0.116882	0	459138	7.1935e+06
1602	-0.991441	0.878988	0.121012	0	459143	7.1935e+06
1603	-0.968952	0.874122	0.125878	0	459148	7.1935e+06
1604	-0.943621	0.868441	0.131559	0	459153	7.1935e+06
1605	-0.938938	0.867367	0.132633	0	459158	7.1935e+06
1606	-0.947845	0.869403	0.130597	0	459163	7.1935e+06
1607	-0.949505	0.869779	0.130221	0	459168	7.1935e+06
1608	-0.886474	0.854824	0.145176	0	459173	7.1935e+06
1609	-0.890872	0.855912	0.144088	0	459178	7.1935e+06
1610	-0.900037	0.858158	0.141842	0	459183	7.1935e+06
1611	-0.911355	0.860891	0.139109	0	459188	7.1935e+06
1612	-0.922363	0.863507	0.136493	0	459193	7.1935e+06
1613	-0.933498	0.86611	0.13389	0	459198	7.1935e+06
1614	-0.926726	0.864532	0.135468	0	459203	7.1935e+06
1615	-0.850277	0.845607	0.154393	0	459208	7.1935e+06
1616	-0.937083	0.86694	0.13306	0	459213	7.1935e+06
1617	-0.929702	0.865227	0.134773	0	459218	7.1935e+06
1618	-0.938496	0.867265	0.132735	0	459223	7.1935e+06
1619	-0.88928	0.855519	0.144481	0	458673	7.1935e+06
1620	-0.968738	0.874075	0.125925	0	458723	7.1935e+06
1621	-0.954703	0.870952	0.129048	0	458728	7.1935e+06
1622	-0.94839	0.869527	0.130473	0	458733	7.1935e+06
1623	-0.911381	0.860897	0.139103	0	458738	7.1935e+06
1624	-0.915416	0.861861	0.138139	0	458743	7.1935e+06
1625	-0.881051	0.853473	0.146527	0	458748	7.1935e+06
1626	-0.973695	0.875162	0.124838	0	458753	7.1935e+06
1627	-0.943885	0.868501	0.131499	0	458758	7.1935e+06
1628	-0.847017	0.844754	0.155246	0	458763	7.1935e+06
1629	-0.95188	0.870317	0.129683	0	458768	7.1935e+06
1630	-0.420334	0.698606	0.301394	0	458773	7.1935e+06
1631	-0.392656	0.686824	0.313176	0	458778	7.1935e+06
1632	-0.115043	0.557269	0.442731	0	458783	7.1935e+06
1633	-0.452016	0.711778	0.288222	0	458788	7.1935e+06
1634	-0.945856	0.868951	0.131049	0	458793	7.1935e+06
1635	-0.967865	0.873882	0.126118	0	458798	7.1935e+06
1636	-0.893267	0.856502	0.143498	0	458803	7.1935e+06
1637	-0.863283	0.848973	0.151027	0	458808	7.1935e+06
1638	-0.977038	0.87589	0.12411	0	458813	7.1935e+06
1639	-0.123291	0.561335	0.438665	0	458818	7.1935e+06
1640	-0.6396	0.782314	0.217686	0	458823	7.1935e+06
1641	-0.567486	0.756755	0.243245	0	458828	7.1935e+06
1642	-0.765105	0.822037	0.177963	0	458833	7.1935e+06
1643	-0.941648	0.867989	0.132011	0	458838	7.1935e+06
1644	-0.824888	0.838861	0.161139	0	458843	7.1935e+06
1645	-0.766435	0.822426	0.177574	0	458848	7.1935e+06
1646	-0.73375	0.812677	0.187323	0	458853	7.1935e+06
1647	-0.613389	0.773254	0.226746	0	458858	7.1935e+06
1648	-0.585945	0.763486	0.236514	0	458863	7.1935e+06
1649	-0.609689	0.771954	0.228046	0	458868	7.1935e+06
1650	-0.785092	0.82781	0.17219	0	458873	7.1935e+06
1651	-0.269893	0.631763	0.368237	0	458878	7.1935e+06
1652	-0.793245	0.830122	0.169878	0	458883	7.1935e+06
1653	-0.38536	0.683677	0.316323	0	458888	7.1935e+06
1654	-0.660535	0.78936	0.21064	0	458893	7.1935e+06
1655	-0.00720096	0.5036	0.4964	0	458898	7.1935e+06
1656	-0.487931	0.726286	0.273714	0	458903	7.1935e+06
1657	-0.855825	0.84705	0.15295	0	458908	7.1935e+06
1658	-0.706236	0.804156	0.195844	0	458913	7.1935e+06
1659	-0.394783	0.687738	0.312262	0	458918	7.1935e+06
1660	-0.803948	0.833119	0.166881	0	458923	7.1935e+06
1661	-0.313186	0.651666	0.348334	0	458928	7.1935e+06
1662	-0.263155	0.628622	0.371378	0	458933	7.1935e+06
1663	-0.322096	0.655701	0.344299	0	458938	7.1935e+06
1664	-0.568201	0.757019	0.242981	0	458943	7.1935e+06
1665	-0.905717	0.859535	0.140465	0	458948	7.1935e+06
1666	-0.642562	0.783321	0.216679	0	458953	7.1935e+06
1667	-0.497731	0.730165	0.269835	0	458958	7.1935e+06
1668	-0.957201	0.871513	0.128487	0	458963	7.1935e+06
1669	-0.311349	0.650832	0.349168	0	458968	7.1935e+06
1670	-0.897568	0.857556	0.142444	0	458973	7.1935e+06
1671	-0.848069	0.84503	0.15497	0	458978	7.1935e+06
1672	-0.909729	0.860501	0.139499	0	458983	7.1935e+06
1673	-0.744295	0.815866	0.184134	0	458988	7.1935e+06
1674	-0.835909	0.841818	0.158182	0	458993	7.1935e+06
1675	-0.80673	0.833891	0.166109	0	458998	7.1935e+06
1676	-0.793738	0.830261	0.169739	0	459003	7.1935e+06
1677	-0.807923	0.834221	0.165779	0	459008	7.1935e+06
1678	-0.256358	0.625443	0.374557	0	459013	7.1935e+06
1679	-0.772428	0.82417	0.17583	0	459018	7.1935e+06
1680	-0.6061	0.770688	0.229312	0	459023	7.1935e+06
1681	-0.678611	0.795308	0.204692	0	459028	7.1935e+06
1682	-0.910891	0.86078	0.13922	0	459033	7.1935e+06
1683	-0.387562	0.684628	0.315372	0	459038	7.1935e+06
1684	-0.952942	0.870556	0.129444	0	459043	7.1935e+06
1685	-0.364402	0.674543	0.325457	0	459048	7.1935e+06
1686	-0.933762	0.866172	0.133828	0	459053	7.1935e+06
1687	-1.04314	0.889563	0.110437	0	459058	7.1935e+06
1688	-0.354946	0.670377	0.329623	0	459063	7.1935e+06
1689	-0.314853	0.652423	0.347577	0	459068	7.1935e+06
1690	-0.482424	0.724092	0.275908	0	459073	7.1935e+06
1691	-0.146806	0.57288	0.42712	0	459078	7.1935e+06
1692	-0.434802	0.704663	0.295337	0	459083	7.1935e+06
1693	-1.03925	0.888797	0.111203	0	459088	7.1935e+06
1694	-0.991002	0.878895	0.121105	0	459093	7.1935e+06
1695	-1.00374	0.88158	0.11842	0	459098	7.1935e+06
1696	-0.974251	0.875283	0.124717	0	459103	7.1935e+06
1697	-0.967385	0.873776	0.126224	0	459108	7.1935e+06
1698	-0.948855	0.869632	0.130368	0	459113	7.1935e+06
1699	-0.943415	0.868394	0.131606	0	459118	7.1935e+06
1700	-1.00466	0.881772	0.118228	0	459123	7.1935e+06
1701	-1.03182	0.887319	0.112681	0	459128	7.1935e+06
1702	-1.02594	0.886137	0.113863	0	459133	7.1935e+06
1703	-1.01029	0.882941	0.117059	0	459138	7.1935e+06
1704	-0.857965	0.847604	0.152396	0	459143	7.1935e+06
1705	-0.933135	0.866026	0.133974	0	459148	7.1935e+06
1706	-0.920745	0.863125	0.136875	0	459153	7.1935e+06
1707	-0.943621	0.868441	0.131559	0	459158	7.1935e+06
1708	-0.946632	0.869127	0.130873	0	459163	7.1935e+06
1709	-0.943446	0.868401	0.131599	0	459168	7.1935e+06
1710	-0.890872	0.855912	0.144088	0	459173	7.1935e+06
1711	-0.890872	0.855912	0.144088	0	459178	7.1935e+06
1712	-0.887686	0.855124	0.144876	0	459183	7.1935e+06
1713	-0.908508	0.860208	0.139792	0	459188	7.1935e+06
1714	-0.913547	0.861415	0.138585	0	459193	7.1935e+06
1715	-0.926117	0.864389	0.135611	0	459198	7.1935e+06
1716	-0.912175	0.861087	0.138913	0	459203	7.1935e+06
1717	-0.935633	0.866605	0.133395	0	459208	7.1935e+06
1718	-0.931115	0.865557	0.134443	0	459213	7.1935e+06
1719	-0.929702	0.865227	0.134773	0	459218	7.1935e+06
1720	-0.796841	0.831134	0.168866	0	459223	7.1935e+06
1721	-0.90148	0.858509	0.141491	0	459228	7.1935e+06
1722	-0.999252	0.88064	0.11936	0	458733	7.19349e+06
1723	-0.999222	0.880634	0.119366	0	458738	7.19349e+06
1724	-0.914735	0.861699	0.138301	0	458743	7.19349e+06
1725	-0.964794	0.873204	0.126796	0	458748	7.19349e+06
1726	-0.527212	0.741624	0.258376	0	458753	7.19349e+06
1727	-0.659719	0.789088	0.210912	0	458758	7.19349e+06
1728	-0.98523	0.87766	0.12234	0	458763	7.19349e+06
1729	-0.979509	0.876427	0.123573	0	458768	7.19349e+06
1730	-0.479055	0.722743	0.277257	0	458773	7.19349e+06
1731	-0.721544	0.808932	0.191068	0	458778	7.19349e+06
1732	-0.249377	0.622166	0.377834	0	458783	7.19349e+06
1733	-0.790902	0.82946	0.17054	0	458788	7.19349e+06
1734	-0.971599	0.874703	0.125297	0	458793	7.19349e+06
1735	0.0167188	0.491641	0.508359	1	458798	7.19349e+06
1736	-0.796976	0.831171	0.168829	0	458803	7.19349e+06
1737	-0.948984	0.869661	0.130339	0	458808	7.19349e+06
1738	-0.652682	0.786736	0.213264	0	458813	7.19349e+06
1739	-0.989197	0.87851	0.12149	0	458818	7.19349e+06
1740	-0.914556	0.861656	0.138344	0	458823	7.19349e+06
1741	-0.230696	0.613344	0.386656	0	458828	7.19349e+06
1742	-0.633415	0.7802	0.2198	0	458833	7.19349e+06
1743	-0.938001	0.867151	0.132849	0	458838	7.19349e+06
1744	-0.875636	0.852113	0.147887	0	458843	7.19349e+06
1745	-0.961744	0.872527	0.127473	0	458848	7.19349e+06
1746	-0.723241	0.809456	0.190544	0	458853	7.19349e+06
1747	-0.556012	0.752506	0.247494	0	458858	7.19349e+06
1748	-0.711134	0.805694	0.194306	0	458863	7.19349e+06
1749	-0.608355	0.771484	0.228516	0	458868	7.19349e+06
1750	-0.336052	0.661974	0.338026	0	458873	7.19349e+06
1751	-0.00736488	0.503682	0.496318	0	458878	7.19349e+06
1752	-0.285641	0.639059	0.360941	0	458883	7.19349e+06
1753	-0.441311	0.707365	0.292635	0	458888	7.19349e+06
1754	-0.498205	0.730352	0.269648	0	458893	7.19349e+06
1755	-0.309694	0.650079	0.349921	0	458898	7.19349e+06
1756	-0.356634	0.671123	0.328877	0	458903	7.19349e+06
1757	-0.635487	0.78091	0.21909	0	458908	7.19349e+06
1758	-0.223682	0.610012	0.389988	0	458913	7.19349e+06
1759	0.00623137	0.496884	0.503116	1	458918	7.19349e+06
1760	-0.863386	0.848999	0.151001	0	458923	7.19349e+06
1761	-0.948871	0.869636	0.130364	0	458928	7.19349e+06
1762	-0.837799	0.842321	0.157679	0	458933	7.19349e+06
1763	-0.286677	0.639537	0.360463	0	458938	7.19349e+06
1764	-0.901405	0.858491	0.141509	0	458943	7.19349e+06
1765	-0.807994	0.834241	0.165759	0	458948	7.19349e+06
1766	-0.830594	0.840398	0.159602	0	458953	7.19349e+06
1767	-0.84703	0.844757	0.155243	0	458958	7.19349e+06
1768	-0.887403	0.855054	0.144946	0	458963	7.19349e+06
1769	-0.461603	0.715695	0.284305	0	458968	7.19349e+06
1770	-0.836368	0.84194	0.15806	0	458973	7.19349e+06
1771	-0.545096	0.748418	0.251582	0	458978	7.19349e+06
1772	-0.835241	0.84164	0.15836	0	458983	7.19349e+06
1773	-0.798262	0.831532	0.168468	0	458988	7.19349e+06
1774	-0.804066	0.833152	0.166848	0	458993	7.19349e+06
1775	-0.884169	0.854251	0.145749	0	458998	7.19349e+06
1776	-0.850144	0.845572	0.154428	0	459003	7.19349e+06
1777	-0.848763	0.845211	0.154789	0	459008	7.19349e+06
1778	0.142599	0.42918	0.57082	1	459013	7.19349e+06
1779	-0.657393	0.788313	0.211687	0	459018	7.19349e+06
1780	-0.882151	0.853748	0.146252	0	459023	7.19349e+06
1781	-0.6707	0.79272	0.20728	0	459028	7.19349e+06
1782	-0.232235	0.614074	0.385926	0	459033	7.19349e+06
1783	-0.127561	0.563437	0.436563	0	459038	7.19349e+06
1784	-0.969711	0.874289	0.125711	0	459043	7.19349e+06
1785	-0.879855	0.853173	0.146827	0	459048	7.19349e+06
1786	-1.02555	0.886059	0.113941	0	459053	7.19349e+06
1787	-1.02877	0.886706	0.113294	0	459058	7.19349e+06
1788	-0.951506	0.870232	0.129768	0	459063	7.19349e+06
1789	-0.887536	0.855087	0.144913	0	459068	7.19349e+06
1790	-0.408991	0.693808	0.306192	0	459073	7.19349e+06
1791	-0.544949	0.748362	0.251638	0	459078	7.19349e+06
1792	-0.995379	0.879823	0.120177	0	459083	7.19349e+06
1793	-1.0283	0.886612	0.113388	0	459088	7.19349e+06
1794	-1.00399	0.881632	0.118368	0	459093	7.19349e+06
1795	-1.00297	0.88142	0.11858	0	459098	7.19349e+06
1796	-0.976035	0.875672	0.124328	0	459103	7.19349e+06
1797	-0.967385	0.873776	0.126224	0	459108	7.19349e+06
1798	-0.832269	0.840846	0.159154	0	459113	7.19349e+06
1799	-0.947146	0.869244	0.130756	0	459118	7.19349e+06
1800	-1.02044	0.885022	0.114978	0	459123	7.19349e+06
1801	-1.02895	0.886743	0.113257	0	459128	7.19349e+06
1802	-1.03182	0.887319	0.112681	0	459133	7.19349e+06
1803	-0.990162	0.878716	0.121284	0	459138	7.19349e+06
1804	-0.960767	0.872309	0.127691	0	459143	7.19349e+06
1805	-0.968952	0.874122	0.125878	0	459148	7.19349e+06
1806	-0.953689	0.870724	0.129276	0	459153	7.19349e+06
1807	-0.945774	0.868932	0.131068	0	459158	7.19349e+06
1808	-0.948647	0.869585	0.130415	0	459163	7.19349e+06
1809	-0.949505	0.869779	0.130221	0	459168	7.19349e+06
1810	-0.944901	0.868733	0.131267	0	459173	7.19349e+06
1811	-0.893745	0.856619	0.143381	0	459178	7.19349e+06
1812	-0.890872	0.855912	0.144088	0	459183	7.19349e+06
1813	-0.893978	0.856677	0.143323	0	459188	7.19349e+06
1814	-0.907488	0.859962	0.140038	0	459193	7.19349e+06
1815	-0.907488	0.859962	0.140038	0	459198	7.19349e+06
1816	-0.918258	0.862536	0.137464	0	459203	7.19349e+06
1817	-0.938496	0.867265	0.132735	0	459208	7.19349e+06
1818	-0.865434	0.849523	0.150477	0	459213	7.19349e+06
1819	-0.937083	0.86694	0.13306	0	459218	7.19349e+06
1820	-0.90962	0.860475	0.139525	0	459223	7.19349e+06
1821	-0.922208	0.86347	0.13653	0	459228	7.19349e+06
1822	-0.88928	0.855519	0.144481	0	458678	7.19349e+06
1823	-0.991793	0.879063	0.120937	0	458738	7.19349e+06
1824	-0.980283	0.876594	0.123406	0	458743	7.19349e+06
1825	-0.960978	0.872356	0.127644	0	458748	7.19349e+06
1826	-1.01548	0.88401	0.11599	0	458753	7.19349e+06
1827	-0.994191	0.879572	0.120428	0	458758	7.19349e+06
1828	-0.996634	0.880088	0.119912	0	458763	7.19349e+06
1829	-0.909158	0.860364	0.139636	0	458768	7.19349e+06
1830	-0.953276	0.870631	0.129369	0	458773	7.19349e+06
1831	-0.573814	0.759077	0.240923	0	458778	7.19349e+06
1832	-0.142536	0.570789	0.429211	0	458783	7.19349e+06
1833	-0.555675	0.752381	0.247619	0	458788	7.19349e+06
1834	-0.399516	0.689767	0.310233	0	458793	7.19349e+06
1835	-0.0265601	0.513277	0.486723	0	458798	7.19349e+06
1836	-0.912986	0.861281	0.138719	0	458803	7.19349e+06
1837	-0.124464	0.561912	0.438088	0	458808	7.19349e+06
1838	-0.535802	0.744902	0.255098	0	458813	7.19349e+06
1839	-0.270779	0.632175	0.367825	0	458818	7.19349e+06
1840	-0.398974	0.689535	0.310465	0	458823	7.19349e+06
1841	-0.555541	0.752331	0.247669	0	458828	7.19349e+06
1842	-0.745308	0.816171	0.183829	0	458833	7.19349e+06
1843	-0.905729	0.859538	0.140462	0	458838	7.19349e+06
1844	-0.844197	0.844013	0.155987	0	458843	7.19349e+06
1845	-0.835863	0.841806	0.158194	0	458848	7.19349e+06
1846	-0.869081	0.850453	0.149547	0	458853	7.19349e+06
1847	-0.817122	0.83675	0.16325	0	458858	7.19349e+06
1848	-0.773914	0.8246	0.1754	0	458863	7.19349e+06
1849	-0.703056	0.803152	0.196848	0	458868	7.19349e+06
1850	0.208216	0.397371	0.602629	1	458873	7.19349e+06
1851	-0.457173	0.713889	0.286111	0	458878	7.19349e+06
1852	-0.301366	0.646281	0.353719	0	458883	7.19349e+06
1853	-0.259518	0.626922	0.373078	0	458888	7.19349e+06
1854	-0.0236795	0.511838	0.488162	0	458893	7.19349e+06
1855	-0.512297	0.735867	0.264133	0	458898	7.19349e+06
1856	0.0823339	0.458926	0.541074	1	458903	7.19349e+06
1857	-0.05789	0.528913	0.471087	0	458908	7.19349e+06
1858	-0.394083	0.687438	0.312562	0	458913	7.19349e+06
1859	-0.912853	0.861249	0.138751	0	458918	7.19349e+06
1860	-0.741415	0.815	0.185	0	458923	7.19349e+06
1861	-0.0159684	0.507984	0.492016	0	458928	7.19349e+06
1862	-0.00445755	0.502229	0.497771	0	458933	7.19349e+06
1863	-0.404726	0.691993	0.308007	0	458938	7.19349e+06
1864	-0.699716	0.802094	0.197906	0	458943	7.19349e+06
1865	-0.81894	0.837246	0.162754	0	458948	7.19349e+06
1866	-0.914975	0.861756	0.138244	0	458953	7.19349e+06
1867	-0.730276	0.811617	0.188383	0	458958	7.19349e+06
1868	-0.886631	0.854863	0.145137	0	458963	7.19349e+06
1869	-0.978032	0.876106	0.123894	0	458968	7.19349e+06
1870	-0.513838	0.736465	0.263535	0	458973	7.19349e+06
1871	-0.789204	0.828979	0.171021	0	458978	7.19349e+06
1872	-0.0557933	0.527868	0.472132	0	458983	7.19349e+06
1873	-0.513028	0.736151	0.263849	0	458988	7.19349e+06
1874	-0.356624	0.671118	0.328882	0	458993	7.19349e+06
1875	-0.785723	0.82799	0.17201	0	458998	7.19349e+06
1876	-0.762765	0.821351	0.178649	0	459003	7.19349e+06
1877	-0.786315	0.828158	0.171842	0	459008	7.19349e+06
1878	-0.687985	0.798343	0.201657	0	459013	7.19349e+06
1879	-0.851786	0.846001	0.153999	0	459018	7.19349e+06
1880	-0.741533	0.815035	0.184965	0	459023	7.19349e+06
1881	-0.736077	0.813385	0.186615	0	459028	7.19349e+06
1882	-0.448371	0.71028	0.28972	0	459033	7.19349e+06
1883	-0.870013	0.85069	0.14931	0	459038	7.19349e+06
1884	-0.147879	0.573405	0.426595	0	459043	7.19349e+06
1885	-1.03069	0.887093	0.112907	0	459048	7.19349e+06
1886	-1.02609	0.886167	0.113833	0	459053	7.19349e+06
1887	-0.786965	0.828343	0.171657	0	459058	7.19349e+06
1888	-0.0721801	0.536027	0.463973	0	459063	7.19349e+06
1889	0.0845623	0.457819	0.542181	1	459068	7.19349e+06
1890	-0.952459	0.870447	0.129553	0	459073	7.19349e+06
1891	-0.115477	0.557483	0.442517	0	459078	7.19349e+06
1892	-1.00125	0.88106	0.11894	0	459083	7.19349e+06
1893	-1.03444	0.887841	0.112159	0	459088	7.19349e+06
1894	-1.02852	0.886657	0.113343	0	459093	7.19349e+06
1895	-1.01268	0.883435	0.116565	0	459098	7.19349e+06
1896	-0.982836	0.877146	0.122854	0	459103	7.19349e+06
1897	-0.97012	0.874378	0.125622	0	459108	7.19349e+06
1898	-0.947146	0.869244	0.130756	0	459113	7.19349e+06
1899	-0.930075	0.865314	0.134686	0	459118	7.19349e+06
1900	-1.02044	0.885022	0.114978	0	459123	7.19349e+06
1901	-1.03182	0.887319	0.112681	0	459128	7.19349e+06
1902	-1.02895	0.886743	0.113257	0	459133	7.19349e+06
1903	-0.9716	0.874703	0.125297	0	459138	7.19349e+06
1904	-0.953132	0.870599	0.129401	0	459143	7.19349e+06
1905	-0.961895	0.872561	0.127439	0	459148	7.19349e+06
1906	-0.946294	0.86905	0.13095	0	459153	7.19349e+06
1907	-0.948647	0.869585	0.130415	0	459158	7.19349e+06
1908	-0.956562	0.87137	0.12863	0	459163	7.19349e+06
1909	-0.948647	0.869585	0.130415	0	459168	7.19349e+06
1910	-0.947845	0.869403	0.130597	0	459173	7.19349e+06
1911	-0.887686	0.855124	0.144876	0	459178	7.19349e+06
1912	-0.893745	0.856619	0.143381	0	459183	7.19349e+06
1913	-0.900037	0.858158	0.141842	0	459188	7.19349e+06
1914	-0.918737	0.86265	0.13735	0	459193	7.19349e+06
1915	-0.928175	0.864871	0.135129	0	459198	7.19349e+06
1916	-0.933498	0.86611	0.13389	0	459203	7.19349e+06
1917	-0.938496	0.867265	0.132735	0	459208	7.19349e+06
1918	-0.938671	0.867306	0.132694	0	459213	7.19349e+06
1919	-0.922208	0.86347	0.13653	0	459218	7.19349e+06
1920	-0.918586	0.862614	0.137386	0	459223	7.19349e+06
1921	-0.922208	0.86347	0.13653	0	459228	7.19349e+06
1922	-0.903566	0.859015	0.140985	0	458678	7.19348e+06
1923	-0.965239	0.873302	0.126698	0	458743	7.19348e+06
1924	-0.964123	0.873055	0.126945	0	458748	7.19348e+06
1925	-0.996696	0.880102	0.119898	0	458753	7.19348e+06
1926	-1.02651	0.886252	0.113748	0	458758	7.19348e+06
1927	-1.03558	0.888067	0.111933	0	458763	7.19348e+06
1928	-0.986719	0.87798	0.12202	0	458768	7.19348e+06
1929	-0.616407	0.774311	0.225689	0	458773	7.19348e+06
1930	-0.972572	0.874916	0.125084	0	458778	7.19348e+06
1931	-0.165727	0.582113	0.417887	0	458783	7.19348e+06
1932	-0.972028	0.874797	0.125203	0	458788	7.19348e+06
1933	-0.139712	0.569405	0.430595	0	458793	7.19348e+06
1934	-0.418091	0.69766	0.30234	0	458798	7.19348e+06
1935	-0.122217	0.560806	0.439194	0	458803	7.19348e+06
1936	-0.290313	0.641212	0.358788	0	458808	7.19348e+06
1937	-0.0688912	0.534391	0.465609	0	458813	7.19348e+06
1938	-0.277272	0.635189	0.364811	0	458818	7.19348e+06
1939	-0.591865	0.765618	0.234382	0	458823	7.19348e+06
1940	-0.600518	0.768709	0.231291	0	458828	7.19348e+06
1941	-0.771274	0.823835	0.176165	0	458833	7.19348e+06
1942	-0.773323	0.824429	0.175571	0	458838	7.19348e+06
1943	-0.790461	0.829335	0.170665	0	458843	7.19348e+06
1944	-0.826433	0.839278	0.160722	0	458848	7.19348e+06
1945	-0.720415	0.808583	0.191417	0	458853	7.19348e+06
1946	-0.857067	0.847372	0.152628	0	458858	7.19348e+06
1947	-0.872605	0.851348	0.148652	0	458863	7.19348e+06
1948	-0.842888	0.843668	0.156332	0	458868	7.19348e+06
1949	-0.699636	0.802068	0.197932	0	458873	7.19348e+06
1950	-0.0260348	0.513014	0.486986	0	458878	7.19348e+06
1951	0.00563727	0.497181	0.502819	1	458883	7.19348e+06
1952	0.0925929	0.453835	0.546165	1	458888	7.19348e+06
1953	0.186948	0.4076	0.5924	1	458893	7.19348e+06
1954	-0.0033538	0.501677	0.498323	0	458898	7.19348e+06
1955	0.00423898	0.497881	0.502119	1	458903	7.19348e+06
1956	-0.413113	0.695556	0.304444	0	458908	7.19348e+06
1957	-0.696824	0.801174	0.198826	0	458913	7.19348e+06
1958	-0.567289	0.756683	0.243317	0	458918	7.19348e+06
1959	-0.824334	0.838711	0.161289	0	458923	7.19348e+06
1960	-0.845005	0.844226	0.155774	0	458928	7.19348e+06
1961	-0.875917	0.852184	0.147816	0	458933	7.19348e+06
1962	-0.605572	0.770501	0.229499	0	458938	7.19348e+06
1963	-0.868304	0.850256	0.149744	0	458943	7.19348e+06
1964	-0.75605	0.819372	0.180628	0	458948	7.19348e+06
1965	-0.893505	0.85656	0.14344	0	458953	7.19348e+06
1966	-0.820569	0.83769	0.16231	0	458958	7.19348e+06
1967	-0.860009	0.848131	0.151869	0	458963	7.19348e+06
1968	-0.927671	0.864753	0.135247	0	458968	7.19348e+06
1969	-0.860173	0.848173	0.151827	0	458973	7.19348e+06
1970	-0.860261	0.848196	0.151804	0	458978	7.19348e+06
1971	-0.246364	0.620749	0.379251	0	458983	7.19348e+06
1972	0.0605532	0.46976	0.53024	1	458988	7.19348e+06
1973	0.204294	0.399251	0.600749	1	458993	7.19348e+06
1974	0.192751	0.404801	0.595199	1	458998	7.19348e+06
1975	-0.65162	0.78638	0.21362	0	459003	7.19348e+06
1976	-0.72317	0.809434	0.190566	0	459008	7.19348e+06
1977	-0.903303	0.858951	0.141049	0	459013	7.19348e+06
1978	-0.781697	0.82684	0.17316	0	459018	7.19348e+06
1979	-0.882445	0.853821	0.146179	0	459023	7.19348e+06
1980	-0.937485	0.867032	0.132968	0	459028	7.19348e+06
1981	-0.740639	0.814766	0.185234	0	459033	7.19348e+06
1982	-0.904808	0.859315	0.140685	0	459038	7.19348e+06
1983	-0.981101	0.876771	0.123229	0	459043	7.19348e+06
1984	-1.02555	0.886059	0.113941	0	459048	7.19348e+06
1985	-1.01507	0.883926	0.116074	0	459053	7.19348e+06
1986	-0.182911	0.590449	0.409551	0	459058	7.19348e+06
1987	-0.0466415	0.523304	0.476696	0	459063	7.19348e+06
1988	-0.86111	0.848415	0.151585	0	459068	7.19348e+06
1989	-0.947886	0.869412	0.130588	0	459073	7.19348e+06
1990	-0.779975	0.826346	0.173654	0	459078	7.19348e+06
1991	-0.993406	0.879406	0.120594	0	459083	7.19348e+06
1992	-1.03917	0.888779	0.111221	0	459088	7.19348e+06
1993	-1.00679	0.882215	0.117785	0	459093	7.19348e+06
1994	-1.00049	0.880899	0.119101	0	459098	7.19348e+06
1995	-0.976026	0.87567	0.12433	0	459103	7.19348e+06
1996	-0.755559	0.819227	0.180773	0	459108	7.19348e+06
1997	-0.937146	0.866954	0.133046	0	459113	7.19348e+06
1998	-0.927953	0.864819	0.135181	0	459118	7.19348e+06
1999	-1.03016	0.886986	0.113014	0	459123	7.19348e+06
[truncated: 15,989 more rows]
